# Supplementary material for: Protocol for SYNchronising Exercises, Remedies in GaIt and Cognition at Home (SYNERGIC@Home): feasibility of a home-based double-blind randomised controlled trial to improve gait and cognition in individuals at risk for dementia
Source: PubMed Central journal article supplement — BMJ Open. 2022 Mar 31;12(3):e059988. doi: 10.1136/bmjopen-2021-059988 (PMC8971768; doi:10.1136/bmjopen-2021-059988), 2022-03-31
Supplement: bmjopen-2021-059988.draft_revisions.pdf [file bmjopen-2021-059988.draft_revisions.pdf]

# BMJ Open

BMJ Open is committed to open peer review. As part of this commitment we make the peer review history of every article we publish publicly available.

When an article is published we post the peer reviewers' comments and the authors' responses online. We also post the versions of the paper that were used during peer review. These are the versions that the peer review comments apply to.

The versions of the paper that follow are the versions that were submitted during the peer review process. They are not the versions of record or the final published versions. They should not be cited or distributed as the published version of this manuscript.

BMJ Open is an open access journal and the full, final, typeset and author-corrected version of record of the manuscript is available on our site with no access controls, subscription charges or pay-per-view fees (<http://bmjopen.bmj.com>).

If you have any questions on BMJ Open's open peer review process please email [info.bmjopen@bmj.com](mailto:info.bmjopen@bmj.com)

# BMJ Open

## **SYNchronizing Exercises, Remedies in GaIt and Cognition at Home (SYNERGIC@Home): Feasibility of a home-based double-blind randomized controlled trial to improve gait and cognition in individuals at risk for dementia**

|                                 |                                                                                                                                                                                                                                                                                                                                                                                                                                                                                                                                                                                                                                                                                                                                                                                                                                                                                                                                                                                                                                                                                                                                                                                                                                                                                                                                                                                                                                                                                                                                                                                                                                                                                                                                                                                                                                                                                                                                                                                                         |
|---------------------------------|---------------------------------------------------------------------------------------------------------------------------------------------------------------------------------------------------------------------------------------------------------------------------------------------------------------------------------------------------------------------------------------------------------------------------------------------------------------------------------------------------------------------------------------------------------------------------------------------------------------------------------------------------------------------------------------------------------------------------------------------------------------------------------------------------------------------------------------------------------------------------------------------------------------------------------------------------------------------------------------------------------------------------------------------------------------------------------------------------------------------------------------------------------------------------------------------------------------------------------------------------------------------------------------------------------------------------------------------------------------------------------------------------------------------------------------------------------------------------------------------------------------------------------------------------------------------------------------------------------------------------------------------------------------------------------------------------------------------------------------------------------------------------------------------------------------------------------------------------------------------------------------------------------------------------------------------------------------------------------------------------------|
| Journal:                        | <i>BMJ Open</i>                                                                                                                                                                                                                                                                                                                                                                                                                                                                                                                                                                                                                                                                                                                                                                                                                                                                                                                                                                                                                                                                                                                                                                                                                                                                                                                                                                                                                                                                                                                                                                                                                                                                                                                                                                                                                                                                                                                                                                                         |
| Manuscript ID                   | bmjopen-2021-059988                                                                                                                                                                                                                                                                                                                                                                                                                                                                                                                                                                                                                                                                                                                                                                                                                                                                                                                                                                                                                                                                                                                                                                                                                                                                                                                                                                                                                                                                                                                                                                                                                                                                                                                                                                                                                                                                                                                                                                                     |
| Article Type:                   | Protocol                                                                                                                                                                                                                                                                                                                                                                                                                                                                                                                                                                                                                                                                                                                                                                                                                                                                                                                                                                                                                                                                                                                                                                                                                                                                                                                                                                                                                                                                                                                                                                                                                                                                                                                                                                                                                                                                                                                                                                                                |
| Date Submitted by the Author:   | 08-Dec-2021                                                                                                                                                                                                                                                                                                                                                                                                                                                                                                                                                                                                                                                                                                                                                                                                                                                                                                                                                                                                                                                                                                                                                                                                                                                                                                                                                                                                                                                                                                                                                                                                                                                                                                                                                                                                                                                                                                                                                                                             |
| Complete List of Authors:       | <p>McGibbon, Chris; University of New Brunswick Fredericton Faculty of Kinesiology, ; University of New Brunswick Institute of Biomedical Engineering,<br/>         Jarrett, Pam; Horizon Health Network, Geriatric Medicine ; Dalhousie University Faculty of Medicine<br/>         Handrigan, Grant ; Universite de Moncton, School of Kinesiology and Recreation, Faculty of Health Sciences and Community Services<br/>         Bouchard, Danielle; University of New Brunswick Fredericton Faculty of Kinesiology,<br/>         Tranchant, Carole; Universite de Moncton, School of Food Science, Nutrition and Family Studies, Faculty of Health Sciences and Community Services<br/>         Sexton, Andrew; University of New Brunswick Institute of Biomedical Engineering,<br/>         Yetman, Linda; Horizon Health Network, Research Services<br/>         Robinson, Bryn; Horizon Health Network, Research Services<br/>         Crapoulet, Stephanie; Vitalite Health Network<br/>         Chamard-Witkowski, Ludivine; Dr Georges-L-Dumont University Hospital Centre, Department of Neuroscience<br/>         Liu-Ambrose, Teresa; The University of British Columbia, Department of Physical Therapy,<br/>         Middleton, Laura; University of Waterloo, Kinesiology<br/>         Almeida, Quincy; Wilfrid Laurier University Faculty of Science, Kinesiology and Physical Education<br/>         Bherer, Louis; Université de Montréal, Department of Medicine<br/>         Lim, Andrew; Sunnybrook Health Sciences Centre Neurology Division, Department of Medicine<br/>         Speechley, Mark; University of Western Ontario, Epidemiology &amp; Biostatistics<br/>         Kamkar, Nellie; Lawson Health Research Institute, Gait and Brain Laboratory<br/>         Montero Odasso, Manuel; Lawson Health Research Institute, Gait and Brain Laboratory; Schulich School of Medicine and Dentistry, Department of Medicine (Geriatrics), University of Western Ontario</p> |
| <b>Primary Subject Heading</b>: | Geriatric medicine                                                                                                                                                                                                                                                                                                                                                                                                                                                                                                                                                                                                                                                                                                                                                                                                                                                                                                                                                                                                                                                                                                                                                                                                                                                                                                                                                                                                                                                                                                                                                                                                                                                                                                                                                                                                                                                                                                                                                                                      |

1  
2  
3  
4  
5  
6  
7  
8  
9  
10  
11  
12  
13  
14  
15  
16  
17  
18  
19  
20  
21  
22  
23  
24  
25  
26  
27  
28  
29  
30  
31  
32  
33  
34  
35  
36  
37  
38  
39  
40  
41  
42  
43  
44  
45  
46  
47  
48  
49  
50  
51  
52  
53  
54  
55  
56  
57  
58  
59  
60

|                            |                                                                                                                |
|----------------------------|----------------------------------------------------------------------------------------------------------------|
| Secondary Subject Heading: | Neurology, Rehabilitation medicine                                                                             |
| Keywords:                  | Dementia < NEUROLOGY, Physiology < NATURAL SCIENCE DISCIPLINES, GERIATRIC MEDICINE, Neuropathology < NEUROLOGY |
|                            |                                                                                                                |

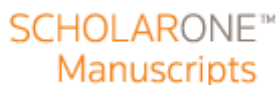

1  
2  
3 1  
4  
5  
6 2 **SYNchronizing Exercises, Remedies in GaIt and Cognition at Home (SYNERGIC@Home):**  
7 3 **Feasibility of a home-based double-blind randomized controlled trial to improve gait and**  
8 4 **cognition in individuals at risk for dementia**  
9  
10 5

11  
12 6 Chris A. McGibbon<sup>1,2</sup>, Pamela Jarrett<sup>3,4</sup>, Grant Handrigan<sup>5</sup>, Danielle R. Bouchard<sup>1</sup>, Carole C.  
13 7 Tranchant<sup>6</sup>, Andrew Sexton<sup>2</sup>, Linda Yetman<sup>7</sup>, Bryn Robinson<sup>7</sup>, Stephanie Crapoulet<sup>8</sup>, Ludivine  
14 8 Chamard-Witkowski<sup>9</sup>, Teresa Liu-Ambrose<sup>10</sup>, Laura Middleton<sup>11</sup>, Quincy J. Almeida<sup>12</sup>, Louis  
15 9 Bherer<sup>13</sup>, Andrew Lim<sup>14</sup>, Mark Speechley<sup>15</sup>, Nellie Kamkar<sup>16</sup>, Manuel Montero-Odasso<sup>16,17</sup>, and  
16 10 the Canadian Consortium for Neurodegeneration in Aging (CCNA), CAN-THUMBS UP Group.

17  
18  
19 11 **Author Affiliations:** <sup>1</sup>Faculty of Kinesiology, University of New Brunswick, Fredericton, New  
20 12 Brunswick, Canada; <sup>2</sup>Institute of Biomedical Engineering, University of New Brunswick,  
21 13 Fredericton, New Brunswick, Canada; <sup>3</sup>Department of Geriatric Medicine, Horizon Health  
22 14 Network, Saint John New Brunswick; <sup>4</sup>Dalhousie Medicine New Brunswick, Dalhousie  
23 15 University, Halifax, Nova Scotia, Canada; <sup>5</sup>School of Kinesiology and Recreation, Faculty of  
24 16 Health Sciences and Community Services, Université de Moncton, Moncton, New Brunswick,  
25 17 Canada; <sup>6</sup>School of Food Science, Nutrition and Family Studies, Faculty of Health Sciences and  
26 18 Community Services, Université de Moncton, Moncton, New Brunswick, Canada; <sup>7</sup>Research  
27 19 Services, Horizon Health Network, Saint John, New Brunswick; <sup>8</sup>Research Services, Vitalité  
28 20 Health Network, Moncton, New Brunswick; <sup>9</sup>Department of Neuroscience, Dr. Georges-L.-  
29 21 Dumont University Hospital Centre, Moncton, New Brunswick, Canada; <sup>10</sup>Department of  
30 22 Physical Therapy, University of British Columbia, Vancouver, British Columbia, Canada;  
31 23 <sup>11</sup>Department of Kinesiology and Health Sciences, Faculty of Health, University of Waterloo,  
32 24 Waterloo, Ontario, Canada; <sup>12</sup>Department of Kinesiology and Physical Education, Faculty of  
33 25 Science, Wilfred Laurier University, Waterloo, Ontario, Canada; <sup>13</sup>Department of Medicine,  
34 26 Faculty of Medicine, Université de Montréal, Québec, Canada; <sup>14</sup>Division of Neurology,  
35 27 Department of Medicine, Sunnybrook Health Sciences Centre, Toronto, Ontario, Canada;  
36 28 <sup>15</sup>Schulich School of Medicine and Dentistry, Department of Epidemiology and Biostatistics,  
37 29 University of Western Ontario, London, Ontario, Canada; <sup>16</sup>Gait and Brain Laboratory, Lawson  
38 30 Health Research Institute, Parkwood Hospital, London Ontario, Canada; <sup>17</sup>Schulich School of  
39 31 Medicine and Dentistry, Departments of Medicine (Geriatrics), University of Western Ontario,  
40 32 London, Ontario, Canada.

41  
42  
43  
44  
45  
46 33 **Trial Registration:** ClinicalTrials.gov, NCT04997681

47  
48 34 Corresponding author: Chris A. McGibbon, PhD. Email: [cmcgibb@unb.ca](mailto:cmcgibb@unb.ca)  
49  
50  
51 35

**ABSTRACT**

**Introduction:** Physical exercise and cognitive training are emerging interventions with the potential to enhance cognitive function and mobility in older adults at risk of Alzheimer's disease and related dementia (ADRD), but little is known about the feasibility of delivering multi-domain interventions in home settings of older adults at risk of ADRD. This study aims to assess the feasibility of home-based delivery of exercise and cognitive interventions, and to evaluate the relationship between participants' intervention preferences and their subsequent adherence. Secondary objectives include the effect of the interventions on ADRD risk factors including frailty, mobility, sleep, diet and psychological health.

**Methods and analysis:** The SYNERGIC@Home feasibility trial is a randomized control trial that follows a 2x2 factorial design, with a 16-week home-based intervention program of physical exercises combined with cognitive training. Participants will be randomized in blocks of four to one of the following four arms: 1) combined exercise (aerobic and resistance) + cognitive training (NEUROPEAK™); 2) combined exercise + control cognitive training (web searching); 3) control exercise (balance and toning) + cognitive training; and 4) control exercise + control cognitive training. SYNERGIC@Home will be implemented through videoconferencing. Baseline and post-intervention assessments at 4 months and 10 months follow-up will include measures of cognition, frailty, mobility, sleep, diet, and psychological health. Primary feasibility outcome is adherence to the interventions. Primary analytic outcome is the relationship between pre-allocation preference for a given intervention and subsequent adherence to the allocated intervention. A series of secondary analytic outcomes examining the potential effect of the individual and combined interventions on cognitive, mobility, and general well-being will be measured at baseline and follow-up.

**Ethics and dissemination:** Ethics approval was granted by the Research Ethics Boards of the University of New Brunswick (#2020-168), Horizon Health Network (#2020-2954), Vitalité Health Network (#2020-35), and Université de Moncton (#2021-049).

**Keywords:** Exercise, cognitive training, intervention preference, cognition, gait, dementia, home-based intervention program.

**66 Strengths and limitations of this study**

- 67 • This study is one of the first randomized control trials (RCTs) in Canada to establish the  
68 feasibility of fully remote recruitment, consent, assessment and delivery of bilingual,  
69 multi-domain, contactless interventions in the home for preventing dementia in at-risk  
70 older adults.
- 71 • This study will also quantify the relationship between participants' preferences for  
72 intervention type and their subsequent adherence to the interventions they were allocated  
73 to, which will provide evidence on whether alternate experimental designs that account  
74 for preference are scientifically justified.
- 75 • Consistent with a feasibility study, the sample is powered for feasibility outcomes rather  
76 than cognitive and health outcomes.
- 77 • The study intervention duration of 16-weeks is short but sufficient for evaluating  
78 feasibility and estimating effect sizes of cognitive and mobility outcomes using remote  
79 assessments.
- 80 • Elements of the study design are consistent with a full-scale double-blind RCT, including  
81 robust screening, randomization and allocation, comprehensive pre- and post-assessments  
82 with long-term follow-up assessment and semi-structured exit interview.

83

84

85

86

87

88

89

90

## 91 1 INTRODUCTION

92 In 2015, over 46 million people lived with Alzheimer’s disease and related dementias (ADRD)  
93 worldwide, with 1 new case appearing every 4.1 seconds<sup>1</sup>. The cost associated with these cases is  
94 over a trillion Canadian dollars<sup>1-3</sup>. There is no cure for dementia<sup>4</sup>. Recently, there has been a shift  
95 in interventional studies on ADRD to targeting pre-dementia states, such as mild cognitive  
96 impairment (MCI)<sup>5,6</sup>. The SYNERGIC Trial (SYNchronizing Exercises, Remedies in GaIt and  
97 Cognition) implemented a multi-domain intervention study for individuals with MCI at sites  
98 across Canada<sup>7</sup> in both English and in French. The positive results of multidomain trials like  
99 SYNERGIC,<sup>8-10</sup> and the ensuing COVID-19 pandemic, have warranted investigation of a home-  
100 based version of the protocol that can reach a wider population of older adults.

101 The primary goal of the SYNERGIC@Home feasibility trial is to assess the feasibility of in-  
102 home delivery of exercise and cognitive training interventions for improving cognitive and  
103 physical functioning in older adults at risk for ADRD. Remote delivery of physical exercise  
104 interventions has been of significant interest for decades<sup>11,12</sup> but randomised controlled trials  
105 (RCT) almost always happen in clinical or academic environments. Building capacity for  
106 conducting assessments and interventions in the home of older adults is now critical for ensuring  
107 safety and accessibility, with the added benefit of reaching a wider and more diverse population  
108 of at-risk older adults<sup>13</sup> while reducing costs of program delivery<sup>14</sup>.

109 The analytic aim of this feasibility trial is to assess if participant’s pre-allocation preference for  
110 different types of interventions is related to their subsequent adherence to the interventions  
111 allocated to them. The landmark Finnish Geriatric Intervention Study to Prevent Cognitive  
112 Impairment and Disability (FINGER)<sup>10</sup> supports the efficacy of multidomain interventions, but  
113 to date no studies have examined if preference plays a role in adherence to those interventions.  
114 This study will inform whether a future preference trial design is warranted.<sup>15</sup>

### 115 1.1 Rationale for the SYNERGIC@HOME Interventions

116 Aerobic exercise (AE) and progressive resistance training (RT) have been shown to improve  
117 cognition, physical capacity and mobility in older adults.<sup>16-19</sup> Both AE<sup>20</sup> and RT<sup>21</sup> trials have  
118 reported positive results in improving cognitive performance, with effects lasting more than 3  
119 months.<sup>16,22</sup> Given the potential benefits of combining both types of exercise, we will deliver a  
120 combined (AE+RT) progressive exercise program as our active exercise intervention. The  
121 control exercise will include balance and toning (BAT) exercises with equivalent time exposure  
122 but no progression. While evidence exists that BAT exercises can improve gait stability<sup>23</sup> and  
123 strength<sup>24</sup>, their effect on cognition is not demonstrated<sup>25</sup>.

124 The rationale for adding cognitive training stems from a plethora of recent research suggesting  
125 that improvements in brain plasticity occur after cognitive training,<sup>26-28</sup> and from the potential  
126 synergistic effect of combining it with physical exercise. Active cognitive training will be  
127 delivered using the NEUROPEAK™ program which consists of a dual-task cognitive training  
128 regimen designed by our group. NEUROPEAK™ has been shown to improve balance<sup>29</sup>,  
129 mobility<sup>27</sup>, and cognition<sup>30,31</sup> in healthy older adults. The control cognitive training will involve

1  
2  
3 130 basic web searching and watching videos (WS+V), which is expected to have a minimal effect  
4 131 on cognition or mobility.

5  
6  
7 132 Finally, sixteen-week interventions of exercise and cognitive training has been conducted in  
8 133 previous studies in a clinical environment which has been shown to give significant and  
9 134 promising results<sup>32,33</sup>, however has not been tested virtually in a home setting.

## 11 135 **1.2 Primary objectives and research questions**

12  
13  
14 136 Our **primary feasibility objective** will measure **adherence to interventions** to answer the  
15 137 question: Will community-dwelling older adults adhere to a 16-week in-home, multidomain,  
16 138 supervised intervention program to improve their health and reduce their risk of ADRD?

17  
18 139 To determine if affinity for any one intervention is an important factor in participants' adherence  
19 140 to the study interventions, we designed the Intervention Preference Questionnaire (see Appendix  
20 141 A) that will be used to answer the following questions:

- 22  
23 142 • **Relation to adherence:** Is adherence correlated with receiving the active treatment they  
24 143 prefer as indicated by their pre-allocation preference ratings?
- 25 144 • **Preference attitudes:** Which intervention type (physical exercise or cognitive training)  
26 145 do most participants prefer over the other? What proportion of participants have no  
27 146 particular preference for either intervention?

28  
29  
30 147 Our **secondary feasibility objectives** will measure **recruitment rate, retention rate, trial**  
31 148 **experience, adverse events, and data loss** to answer the questions, respectively: How efficient  
32 149 is recruitment? Do participants stay in the trial for its duration? How satisfied are participants  
33 150 with the interventions? What adverse events are related to the intervention(s)? What is the rate of  
34 151 data loss when doing remote assessments?

## 36 152 37 38 39 153 **2 METHODS AND ANALYSIS**

### 40 41 154 **2.1 Study design**

42  
43  
44 155 SYNERGIC@Home is a home-based, double-blind, randomized controlled trial, with a four-arm  
45 156 full-factorial (2x2) design. It will be administered virtually through a secure online video  
46 157 conferencing platform. Block randomization by four will be used to allocate enrolled participants  
47 158 into one of four arms, with 16 participants in each arm (experimental conditions are in bold):

- 48  
49 159 • Arm 1: **Combined exercise (AE+RT) + Cognitive training (NEUROPEAK™)**
- 50 160 • Arm 2: **Combined exercise (AE+RT) + Control cognitive training (WS+V)**
- 51 161 • Arm 3: Control exercise (BAT) + **Cognitive training (NEUROPEAK™)**
- 52 162 • Arm 4: Control exercise (BAT) + Control cognitive training (WS+V)

53  
54  
55 163 The experimental design is shown in Figure 1.



164 <Figure 1>

165 Assessments will occur at baseline (T0), 4mo (T4), and at 10mo follow-up (T10). The SPIRIT  
166 schedule of enrollment, interventions, and assessments is shown in Figure 2.

167 <Figure 2>

## 168 2.2 Participants and setting

169 Sixty-four older adults (age 60-90 years) at risk of developing ADRD, who live in the province  
170 of New Brunswick, Canada, and meet the inclusion and exclusion criteria will be recruited by  
171 study staff not involved in the participant's ongoing care. Participants will include francophone  
172 and anglophone and geographical recruitment areas will be both rural and urban. All intervention  
173 activity will take place in the participant's home.

## 174 2.3 Inclusion criteria

- 175 • Age 60 to 90 years
- 176 • Has a Family Physician/Nurse Practitioner
- 177 • Has internet access and basic technology ability (able to send and receive emails)
- 178 • Resides in their own home/apartment
- 179 • Has access to a home computer and/or a laptop computer device
- 180 • Self-reported levels of proficiency in English and/or French for reading, speaking and  
181 writing
- 182 • Able to comply with scheduled home-based assessments and interventions
- 183 • Able to ambulate at least 10 m independently with or without a walking aid
- 184 • At risk of developing dementia (see Table 1 and Appendix B):
  - 185 a) Mild Cognitive Impairment (MCI)
  - 186 b) Subjective Cognitive Impairment (SCI)
  - 187 c) Cognitively Intact (CI) with 2 or more of the following risk factors: obesity,  
188 hypertension, diabetes, cardiovascular disease, physical inactivity, first-degree  
189 family history of dementia, dyslipidemia, poor sleep, and poor diet
- 190 • Deemed safe by the study physician to participate in exercise<sup>31</sup>
- 191 • Preserved activities of daily living (score of > 14/23 on the Lawton-Brody Instrumental  
192 Activities of Daily Living (IADL) scale<sup>34</sup>).

193 <Table 1>

## 194 2.4 Exclusion criteria

- 195 • Diagnosis of dementia
- 196 • Living in Nursing Homes or Adult Residential Facilities.

- 197 • Serious underlying disease, which, in the opinion of the study physician would
- 198 compromise the participant's safety
- 199 • Surgery within the last two months or in the coming 12 months
- 200 • History of intracranial surgery
- 201 • Regularly takes benzodiazepines that would interfere with participation
- 202 • Presence of major depression, schizophrenia, severe anxiety or drug/alcohol abuse or
- 203 other medical illness that would prohibit safe participation
- 204 • Current Parkinsonism or any neurological disorder, active musculoskeletal disorders or
- 205 history of knee/hip replacement that affects gait
- 206 • Severe visual and/or auditory impairment
- 207 • Intention to enroll in other clinical trials during the same period
- 208 • Active participation in an organized and planned exercise program involving aerobic
- 209 and/or resistance training regimen in previous 6 months

## 210 **2.5 Recruitment and screening**

### 211 **2.5.1 Recruitment procedures**

212 Recruitment will include posters and posts on community and healthcare provider websites,  
213 public and social media, physician offices, and paid newspaper advertisements.

### 214 **2.5.2 Screening and consenting procedures**

215 Consent will be obtained (see Appendix C) before any screening activities occur. The screening  
216 visit will be done virtually using a secure online platform. Following the screening visit, a virtual  
217 meeting with the study physician will occur for diagnostic validation and determination of  
218 inclusion and exclusion criteria. Participants will then be enrolled and randomized. Participants  
219 will indicate on the consent form if acquisition and retention of their saliva sample is permitted  
220 for the Polygenic Hazard Score analysis.<sup>35,36</sup>

### 221 **2.5.3 Study Care Partners**

222 Each participant will be asked to identify a care partner (someone who knows them well) who  
223 can assist with some of the cognitive tests and assessments as needed. A care partner is not  
224 mandatory unless the participant has MCI or SCI. The care partner will be asked to provide  
225 informed consent as well (see Appendix D).

## 226 **2.6 Randomization and allocation**

227 Randomization will be conducted by research personnel not involved in screening, assessments  
228 or interventions using a simple excel formula that generates a random number within a sequence.  
229 A block randomization by four will be applied to ensure an appropriate balance between  
230 treatment arms. Permuted blocks will be employed to ensure balance over time.

231

## 2.7 Blinding and debriefing

To minimize bias, the study will be double-blinded. Research personnel performing the outcome assessments will be blinded to group allocation. Participants will also be blinded to which intervention they received and to study hypotheses. Only the designated research personnel delivering the interventions will know the treatment group that participants belong to and will not reveal the participants' allocation (unless it is medically necessary to do so) until the end of the trial.

## 2.8 Early withdrawals

Participants will be withdrawn from the study if they: 1) no longer wish to continue their participation in the study (voluntary withdrawal), or 2) in the opinion of one of the study physicians, it is medically necessary to withdraw the participant (medically necessary withdrawal).

### 2.8.1 Voluntary withdrawal

Participants who inform their Intervention Research Assistant (RA) that they wish to voluntarily withdraw will be asked by the Intervention Coordinator (to protect blinding) if they would be willing to continue their participation in either intervention on its own and return for their follow-up assessments. In this scenario, they will not be withdrawn from the study provided they agreed to at least the T4 assessment. Voluntary non-compliance will be captured by entering 0 values in their intervention logs for the remainder of the weekly session(s) they withdrew from.

If the participant wishes to completely withdraw from the study, s/he will be asked to complete the Exit Survey and will subsequently be withdrawn from the study.

### 2.8.2 Medically necessary withdrawal

Medically necessary withdrawals may be required if participants experience unanticipated adverse events or changes in medication or health status, that in the judgement of a study physician, places the participant at risk of harm.

If it is deemed medically necessary to withdraw the participant, the Clinical Research Coordinator and/or Study Physician will meet with the participant to explain the reason(s) for being withdrawn from the study, and to inquire about the elements of the study that may have led to their change in health status (if applicable). If willing, the participant will be asked to complete the Exit Survey and will subsequently be withdrawn from the study.

## 2.9 Interventions

All participants will receive home-based intervention sessions of 90 minutes each three times per week for 16 weeks (48 sessions). Intervention research assistants (RA) trained and certified by the Canadian Society for Exercise Physiology (CSEP) will remotely supervise all sessions via a secure online video conferencing platform. Each participant will be assigned an RA that remains

with them throughout the trial. Each session will consist of 20-25 minutes of cognitive training (NEUROPEAK™) or the control cognitive training (WS+V), followed by 50-60 minutes of exercise intervention (AE+RT) or control exercise (BAT). RAs will maintain an intervention log for each participant, documenting start and end times for each activity.

### **2.9.1 Active Exercise Intervention: Aerobic Exercise + Resistance Training (AE+RT)**

Participants receiving the AE+RT intervention will have home-based aerobic and resistance exercise (Table 2). The RA trainers will coach participants throughout the entire session and document their progress. The level of difficulty and progression for the AE+RT exercise will be tailored to their individual level with constant monitoring.

### **2.9.2 Control Exercise Intervention: Balance and Toning (BAT)**

Participants receiving the BAT control exercise will have home-based balance and toning exercises (Table 3). The format of the BAT session including the duration of activities and the amount of coaching will mirror that of the AE+RT session except the exercises will be devoted to improving muscle tone, balance and flexibility. Resistant load and number of repetitions will *not* progress during the trial.

### **2.9.3 Cognitive Training Intervention: NEUROPEAK™**

Participants assigned to the active cognitive intervention will first receive training on how to use NEUROPEAK™ on a tablet computer provided by the study (for uniformity). For this study a custom-written program consisting of a dual-task training program will be used<sup>37-39</sup> that requires participants to maintain and prepare for many response alternatives (working memory) and to share attention between two concurrent tasks (divided attention). Difficulty and progression of cognitive training is tailored to their individual functioning level and performance.

### **2.9.4 Control Cognitive Intervention: Web Search and Video (WS+V)**

Participants assigned to the control cognitive training will received home-based sessions that alternate between two different tasks: web searching for tourist sites and video watching. For the touristic web searching, participants will be required to find hotels, touristic places, and restaurants of their own preference in a city assigned by the RA (a new city will be selected each session). For the video watching, participants will view an educational video about nature and will be asked several questions about it.

## **2.10 Assessment Outcomes**

All feasibility objectives are consistent with current recommendations on conducting feasibility trials.<sup>40</sup>

### **2.10.1 Primary Feasibility Outcome**

- 1  
2  
3 300 • **Intervention Adherence:** Defined as the percent of all intervention sessions attended of  
4 301 the total planned sessions per participant (48-2=46 allowing for 2 missed sessions). To  
5 302 account for partial sessions each intervention session will be treated as a fractional  
6 303 measure: number of minutes training/scheduled session minutes, where scheduled  
7 304 minutes are 50min for exercise interventions and 20min for cognitive interventions.

9  
10 305 **2.10.2 Secondary Feasibility Outcomes**

- 11  
12 306 • **Recruitment Rate:** Defined as the total percent of enrolled participants relative to  
13 307 number of people screened for eligibility.  
14 308 • **Retention Rate:** Defined as the total percent of enrolled participants who continue  
15 309 throughout the trial and participate in outcomes assessments. Enrollment retention is the  
16 310 % of enrolled participants who complete T4 assessment, and follow-up retention is the %  
17 311 of those who complete the follow-up T10 assessment.  
18 312 • **Trial Experience:** A mixed methods approach will be used to explore participant  
19 313 experience after the trial using one-on-one interviews with a sub-sample (3 per arm=12).  
20 314 All participants will be invited to complete an Exit Survey about their experience.  
21 315 • **Adverse Events (AEs):** Relationship between AEs severity and relation to trial.  
22 316 • **Data Loss:** Defined as data lost due to technical failures resulting in data loss include  
23 317 problems with electronic equipment or internet communications, personnel errors such as  
24 318 issuing improperly configured equipment, scheduling errors, and omitting assessments,  
25 319 and participant non-compliance such as omitting responses on surveys or declining  
26 320 assessments.

27  
28  
29  
30  
31 321 **2.10.3 Primary Analytic Outcomes**

32  
33 322 **Intervention Preference:** The primary analytic goal of SYNERGIC@Home is to assess the  
34 323 relationship between participants' adherence to the interventions and their affinity for each  
35 324 intervention going into the trial, as well as other questions about preference. All participants will  
36 325 be given the IPQ at T0, prior to randomization.

37  
38  
39 326 The IPQ asks about their affinity for the offered interventions by quantifying interest level and  
40 327 preferences for the interventions. We will explain to participants that their responses on the  
41 328 questionnaire will not in any way influence the intervention group they will be randomly  
42 329 assigned to.

43  
44  
45 330 **2.10.4 Secondary Analytic Outcomes**

46  
47 331 Various cognitive and psychological tests will be administered as part of a neuropsychological  
48 332 test battery, as well as gait, mobility, sleep, diet and biological markers (please see Figure 2 for a  
49 333 fuller list).

50  
51  
52 334 **2.11 Safety evaluation**

53  
54 335 All adverse events (AEs) and serious AEs (SAEs) that occur between consent and completion of  
55 336 the study will be reported. All AEs and SAEs will be monitored to determine the outcome or

337 until the study physician and/or appropriate research personnel considers it justifiable to  
338 terminate follow-up. AEs will be classified as mild, moderate, or severe. The relationship of the  
339 AEs to study procedure will be determined and classified as not related, unlikely, possible,  
340 probable, or definite. All AEs and SAEs will be reported to the Safety and Data Monitoring  
341 Committee and REBs as required.

## 342 **2.12 Sample size**

343 Power analysis was conducted using G\*Power 3.1 based on our primary analytic goal of  
344 assessing the relationship between intervention preference and subsequent adherence to the  
345 interventions. Specifically (see 2.13.2 below), we plan on examining correlations among  
346 continuous variables with one-tailed analyses at  $\alpha = .05$  for two pairs of variables (equivalent to a  
347 two-tailed test at  $\alpha = .1$ , to account for both intervention types). To achieve a power of .8 we  
348 would require 48 participants. Assuming a 25% loss, a total of sixty-four participants will be  
349 enrolled.

## 350 **2.13 Statistical analysis**

351 All calculations will be made using the Statistical Package for the Social Sciences (SPSS version  
352 23.0, IBM Inc., Chicago, IL) and Stata (Stata Statistical Software: Release 14, StataCorp LP,  
353 College Station, TX).

354 Descriptive statistics for demographic and baseline characteristics will be provided with means  
355 and standard deviations, or medians and the interquartile range where appropriate, for continuous  
356 characteristics and frequencies and percentages for categorical variables.

### 357 **2.13.1 Feasibility outcomes**

358 Adherence to the interventions will be analyzed using a one-sample t-test that will test the null  
359 hypothesis that participants complete 50% of their scheduled intervention time. This test will be  
360 used to determine if the adherence is superior to that hypothesized (feasibility target is 75%) or  
361 inferior to that hypothesized (questionable feasibility is significantly <50%).

362 Secondary feasibility outcomes will be analyzed using non-parametric Chi-square tests. Target  
363 enrollment retention (75%) and follow-up retention (56%) will be tested against observed  
364 frequencies using a Chi-square goodness-of-fit test. This test will be used to determine if the  
365 achieved distribution of eligible participants is similar to that hypothesized, superior to that  
366 hypothesized or inferior to that hypothesized. Adverse events will be analyzed using a Chi-  
367 square cross-tabulation analysis between AEs severity and AEs relation-to-trial. We will use this  
368 analysis to test the hypothesis that there is a relationship between AEs severity and being in the  
369 trial. Furthermore, we will stratify the sample by treatment arm and use a Chi-square goodness-  
370 of-fit test to determine if AEs are distributed differently across treatment arms against the null  
371 hypothesis of an even distribution (no relation to treatment arm).

### 372 **2.13.2 Analytic outcomes**

373 Intervention preference will be analyzed by transforming a set of variables:

- 374 • **Interest in the Interventions:** Question 1 in the IPQ rates participant's interest in each  
375 intervention independently: exercise (**INT\_EX**) and cognitive training (**INT\_CT**), on a  
376 0-10 scale.
- 377 • **Intervention Preference:** The second question rates their relative preference for either  
378 intervention. This will generate a single variable that gives the relative preference (-2 to 2  
379 scale), **PR**, where negative scores and positive scores indicate a preference for exercise or  
380 cognitive training, respectively.
- 381 • **Intervention Allocated:** The treatment arms can be represented by two dummy (0,1)  
382 variables for exercise (**EX\_ARM**) and cognitive (**CT\_ARM**) where 1=active treatment  
383 and 0=control treatment.
- 384 • **Adherence to Interventions:** Adherence to the interventions at the end of the trial, for  
385 exercise (**AD\_EX**) and cognitive training (**AD\_CT**), as well as overall **AD**, are  
386 continuous scale variables.

387 **What is the relationship between adherence and intervention interest?** We will correlate  
388 interest level for each intervention with adherence rates calculated from trial logs, using Pearson  
389 correlation coefficient ( $\rho_{X,Y}$ ) with a one-tailed alpha of .05. The intervention is powered for  
390 testing this hypothesis (see 2.12).

391  $H_0: \rho_{X,Y} = 0$ ,  $H_1: \rho_{X,Y} > 0$ , where  $X=INT\_EX$  and  $Y=AD\_EX$

392  $H_0: \rho_{X,Y} = 0$ ,  $H_1: \rho_{X,Y} > 0$ , where  $X=INT\_CT$  and  $Y=AD\_CT$

393 Rejection of the null hypothesis for either test will allow us to conclude that interest level in the  
394 intervention type prior to the trial explains a significant amount of variance in adherence to the  
395 trial.

396 **Do participants adhere better if they receive the active treatments they prefer?** Because  
397 some participants will be randomly assigned to the active intervention that matches their  
398 preference and others will not, we will transform the **PR** score into a signed logical **PR\_MET** (-  
399 1=preference not met, 0=no preference, +1=preference met) according to what intervention  
400 (**EX\_ARM** and/or **CT\_ARM**) they were allocated to. We will test the hypothesis that

401  $H_0: \rho_{X,Y} = 0$ ,  $H_1: \rho_{X,Y} \neq 0$ , where  $X=PR\_MET$  and  $Y=AD$

402 Rejection of the null hypothesis ( $p < .05$ ) will allow us to conclude that adherence to the  
403 interventions is significantly influenced by receiving the active intervention they prefer.

404 **How do cognitive and mobility outcomes change as a result of the interventions?** Finally,  
405 intention-to-treat (ITT) analysis of cognitive and mobility outcomes with a general linear model  
406 or linear mixed model approach will be used to measure intervention effects, and we will  
407 estimate effect size based on Cohen's descriptors 0.2 = small; 0.5 = moderate; 0.8 = large for  
408 cognitive and mobility outcomes listed in Figure 2.

## 2.14 Data management and monitoring

All electronic data will be stored on a secure platform at the lead university site. Paper copies of assessment forms will be stored in locked cabinets located at the workplaces of remote study research staff, and then transferred to the participating hospital site. Deidentified copies of the data will also be stored on a secure server called LORIS (Longitudinal Online Research and Imaging System) at the McGill Centre for Integrative Neuroscience, McGill University, Montreal, Quebec. All data will be double entered for data quality monitoring. Assessments at T0, T4, and T10 will be video and audio recorded. In addition, a subset of three intervention sessions will be selected to be video recorded per participant for quality control. The video and audio recordings will be deleted once the data have been validated and released by LORIS.

There will be a Data Safety and Monitoring Committee chaired by an independent person not related to the study and will be comprised of the principal investigators, key research staff and researchers, an independent physician and two community representatives (anglophone and francophone). They will review all AEs, SAEs, protocol deviations, progress of the research, and audit study procedures if needed. Protocol amendments will be reported to this committee. All information related to adverse events, protocol amendments, and protocol deviations will be reported to the appropriate Research Ethics Boards.

## 2.15. Access to data

Access to and analyses of study data stored in LORIS may be granted to qualified persons 12 months after the principal paper answering primary research questions are published. Such requests will be made via email to the Canadian Consortium for Neurodegeneration and Aging [ccna.admin@ladydavis.ca] or via the LORIS Data Access Module.

## 2.16 Participant and public involvement

The SYNERGIC@Home feasibility study offers older adults and their families a unique opportunity to participate in a fully remote bilingual (French and English) RCT from their home. Participants will be invited to share their experience through questionnaires upon completion of the study as well as through individual semi-structured interviews. Participants will be able to provide direct feedback on trial improvement strategies, which could be implemented in future studies.

## 2.17 Ethics and dissemination

This study is conducted in compliance with International Conference on Harmonization of Good Clinical Practice (ICH-GCP) and all applicable regulatory requirements. SYNERGIC@Home has undergone review and approval from the Research Ethics Committees/Boards of: Horizon Health Network (#2020-2954); Vitalité Health Network (#2020-35), University of New Brunswick (#2020-168), and Université de Moncton (#2021-049).

444



### 445 **3 DISCUSSION**

446 Older adults at risk for ADRD have incident rates of related risk factors several times higher than  
447 their cognitively healthy counterparts.<sup>41</sup> Additionally, these individuals at risk for ADRD have an  
448 increased risk of falling and mobility decline.<sup>42,43</sup> Physical exercise and cognitive training are  
449 emerging as promising non-pharmacological interventions to enhance mobility and cognitive  
450 functioning in older adults, especially in pre-dementia states. These interventions have been  
451 tested separately, with positive results for physical exercise and cognitive training in improving  
452 cognitive function.<sup>9,16,18,21,44</sup> The preliminary success of the original SYNERGIC program and  
453 similar combined interventions have illustrated the promising nature of non-pharmacological  
454 exercise interventions and cognitive training to enhance cognition for older adults at risk of  
455 developing ADRD<sup>7,45-47</sup>.

456 To our knowledge, this is the first study investigating the feasibility of conducting an entirely  
457 virtual, home-based, combined exercise and cognitive training intervention program for older  
458 adults at risk for ADRD.

#### 459 **3.1 Significance of establishing feasibility**

460 Establishing the feasibility of conducting a virtual, home-based, multidomain intervention has  
461 the potential to inform other researchers on the logistics of designing remote intervention  
462 programs. If successful, the methodology and procedures tested in this feasibility trial could set  
463 the standard for a new platform in which participants are no longer restricted to intervention  
464 studies conducted in a common physical space.

#### 465 **3.2 Significance of examining intervention preference**

466 Establishing if preference bias plays a role in which interventions older adults at risk of ADRD  
467 will adhere to is expected to provide unique insights into multidomain trial adherence, and will  
468 inform the design of future larger RCTs if it is found warranted to control for such bias using a  
469 preference design.<sup>15</sup>

#### 470 **3.3 Significance of secondary outcomes**

471 We expect that the combined active exercise and cognitive training arms will have the greatest  
472 improvement (or least decline) of cognitive and mobility outcomes, followed by those who  
473 receive one active treatment, and finally those receiving both control treatments having the least  
474 improvement (or greatest decline). If successful, the combined interventions will further  
475 demonstrate a delay in their progression to dementia, warranting a larger RCT.

#### 476 **3.4 Benefits of interventions**

477 Mechanistically, AE and RT exercises can provoke a cascade of biochemical, physiological, and  
478 structural changes in the brain including increases in blood flow, neurotrophic factor release,  
479 neurogenesis, immune system efficacy and metabolism. These effects of exercise could combat  
480 inflammatory processes and the atrophy of brain structures often associated with aging and

1  
2  
3 481 ADRD<sup>32,34</sup>. Mechanisms suggested involve modulation of insulin-like growth factor-1 and  
4 482 insulin sensitivity, decreasing inflammation, enhancing release of brain-derived neurotrophic  
5 483 factor pathways, and even a decrease in brain amyloid.<sup>21,48,49</sup> Combined exercise interventions  
6 484 have also shown increased brain volume and muscle mass in older adults.<sup>50</sup> Furthermore,  
7 485 cognitive training has also been shown to improve overall cognition.<sup>30,31</sup> Individuals who  
8 486 practiced monitoring of two tasks at the same time on computer devices have presented with  
9 487 improved connectivity between prefrontal and temporal cortices, areas known to be important for  
10 488 executive functioning and memory, when compared to control participants.<sup>40</sup>

### 13 489 **3.5 Strengths and concluding remarks**

14  
15  
16 490 To our knowledge, this fully remote RCT is the first to test the feasibility of implementing, in  
17 491 two official languages, a combined physical exercise program with cognitive training to improve  
18 492 cognition and mobility in community-dwelling older adults at risk for ADRD. We will also  
19 493 establish the extent to which measuring participant preference for a given intervention is related  
20 494 to subsequent adherence. We believe that this will inform other researchers and scholars on  
21 495 whether the costs and efforts associated with tailoring interventions in future studies to match  
22 496 participant preferences are worthwhile.

23  
24  
25 497 In conclusion, SYNERGIC@Home will build capacity for future research RCT designs using  
26 498 home-based interventions in older adults at risk for ADRD.

27  
28  
29 499

30  
31 500 <end of main body>

1  
2  
3 501 **Acknowledgements:** We acknowledge the significant contributions of CCNA CAN-THUMBS  
4 502 UP Group Co-Principal Investigators: Howard Chertkow, Sylvie Belleville, Howard Feldman,  
5 503 Manuel Montero-Odasso, Haakon Nygaard; and Steering Committee members: Danielle Alcock,  
6 504 Nicole Anderson, Sarah Banks, Paul Brewster, Senny Chan, Marc Cuesta, Samir Das, Carol  
7 505 Evans, Guylaine Ferland, Tati Herold, Scott Hofer, Inbal Itzhak, Diane Jacobs, Pam Jarrett,  
8 506 Nellie Kamkar, Andrew Lim, Jody-Lynn Lupo, Lisa Madlensky, Chris McGibbon, Karen  
9 507 Messer, Zia Mohades, Carolyn Revta, Julie Robillard, Penny Slack, Eric Smith, Mark Speechley,  
10 508 Jennifer Walker, Jingjing Zou. This program was made possible by the participation of the  
11 509 Citizen Advisory Group, research students, support staff and other special groups.

12  
13  
14 510 **Collaborators:** Canadian Consortium for Neurodegeneration in Aging (CCNA), and Canadian  
15 511 Therapeutic Platform Trial for Multidomain Interventions to Prevent Dementia (CAN-THUMBS  
16 512 UP).

17  
18  
19 513 **Contributors:** All authors have read and approved of the final manuscript. CAM and PJ are the  
20 514 co-lead authors and contributed to the conception and development of the protocol and writing  
21 515 the manuscript. GH, DB, and CCT contributed to the conception and development of the  
22 516 interventions and writing the manuscript. AS, LY, BR, SC, NK and LW contributed to the  
23 517 development of the protocol and writing the manuscript. MS contributed to the study design and  
24 518 analysis. MMO conceived of the SYNERGIC program and various elements of the interventions  
25 519 and assessments were developed by TLA, LM, QA, LB and AL.

26  
27  
28 520 **Funding:** This work is supported by the Healthy Seniors Pilot Project (funding application  
29 521 C0042, January 2020 – October 2022), funded through the Government of New Brunswick and  
30 522 the Public Health Agency of Canada.

31  
32  
33 523 The Canadian Consortium on Neurodegeneration in Aging is supported by a grant from the  
34 524 Canadian Institutes of Health Research with additional funding from several partners. A  
35 525 substantial component of this funding for the CAN-THUMBS UP program derives from the  
36 526 Alzheimer's Society of Canada CCNA partnership.

37  
38  
39 527 **Competing interests:** None declared.

40  
41 528 **Patient consent for publication:** Not required.

42  
43  
44 529 **Supplemental material:** This content has been supplied by the author(s). It has not been vetted  
45 530 by BMJ Publishing Group Limited (BMJ) and may not have been peer-reviewed. Any opinions  
46 531 or recommendations discussed are solely those of the author(s) and are not endorsed by BMJ.  
47 532 BMJ disclaims all liability and responsibility arising from any reliance placed on the content.  
48 533 Where the content includes any translated material, BMJ does not warrant the accuracy and  
49 534 reliability of the translations (including but not limited to local regulations, clinical guidelines,  
50 535 terminology, drug names and drug dosages), and is not responsible for any error and/or  
51 536 omissions arising from translation and adaptation or otherwise.

52  
53  
54 537 **Open access:** This is an open access article distributed in accordance with the Creative  
55 538 Commons Attribution Non Commercial (CC BY-NC 4.0) license, which permits others to

1  
2  
3 539 distribute, remix, adapt, build upon this work non-commercially, and license their derivative  
4 540 works on different terms, provided the original work is properly cited, appropriate credit is  
5 541 given, any changes made indicated, and the use is non-commercial. See:  
6 542 <http://creativecommons.org/licenses/by-nc/4.0/>.

8  
9 543 **ORCID ID:** Chris A. McGibbon <https://orcid.org/0000-0001-7849-7895>; Grant Handrigan  
10 544 <https://orcid.org/0000-0001-7793-5371>; Carole C. Tranchant <https://orcid.org/0000-0002-2026-819X>  
11 545

12  
13  
14 546 **REFERENCES**References List

- 15 547  
16  
17  
18 548 1. International AD. The Global Impact of Dementia: An analysis of prevalence, incidence,  
19 549 cost and trends. *The World Alzheimer Report*. 2016.  
20 550 2. Alzheimer Society of C. Report summary Prevalence and monetary costs of dementia in  
21 551 Canada (2016): a report by the Alzheimer Society of Canada. *Health Promot Chronic Dis*  
22 552 *Prev Can*. 2016;36(10):231-232.  
23 553 3. Ostbye T, Crosse E. Net economic costs of dementia in Canada. *CMAJ*.  
24 554 1994;151(10):1457-1464.  
25 555 4. Takeda A, Loveman E, Clegg A, et al. A systematic review of the clinical effectiveness  
26 556 of donepezil, rivastigmine and galantamine on cognition, quality of life and adverse  
27 557 events in Alzheimer's disease. *Int J Geriatr Psychiatry*. 2006;21(1):17-28.  
28 558 5. Albert MS, DeKosky ST, Dickson D, et al. The diagnosis of mild cognitive impairment  
29 559 due to Alzheimer's disease: recommendations from the National Institute on Aging-  
30 560 Alzheimer's Association workgroups on diagnostic guidelines for Alzheimer's disease.  
31 561 *Alzheimers Dement*. 2011;7(3):270-279.  
32 562 6. Petersen RC. Clinical practice. Mild cognitive impairment. *N Engl J Med*.  
33 563 2011;364(23):2227-2234.  
34 564 7. Montero-Odasso M, Almeida QJ, Burhan AM, et al. SYNERGIC TRIAL  
35 565 (SYNchronizing Exercises, Remedies in Gait and Cognition) a multi-Centre randomized  
36 566 controlled double blind trial to improve gait and cognition in mild cognitive impairment.  
37 567 *BMC Geriatr*. 2018;18(1):93.  
38 568 8. Teixeira CVL, Ribeiro de Rezende TJ, Weiler M, et al. Cognitive and structural cerebral  
39 569 changes in amnesic mild cognitive impairment due to Alzheimer's disease after  
40 570 multicomponent training. *Alzheimers Dement (N Y)*. 2018;4:473-480.  
41 571 9. Ballesteros S, Voelcker-Rehage C, Bherer L. Editorial: Cognitive and Brain Plasticity  
42 572 Induced by Physical Exercise, Cognitive Training, Video Games, and Combined  
43 573 Interventions. *Front Hum Neurosci*. 2018;12:169.  
44 574 10. Ngandu T, Lehtisalo J, Solomon A, et al. A 2 year multidomain intervention of diet,  
45 575 exercise, cognitive training, and vascular risk monitoring versus control to prevent  
46 576 cognitive decline in at-risk elderly people (FINGER): a randomised controlled trial.  
47 577 *Lancet*. 2015;385(9984):2255-2263.  
48 578 11. Norman GJ, Zabinski MF, Adams MA, Rosenberg DE, Yaroch AL, Atienza AA. A  
49 579 review of eHealth interventions for physical activity and dietary behavior change. *Am J*  
50 580 *Prev Med*. 2007;33(4):336-345.

- 1  
2  
3 581 12. Hillsdon M, Foster C, Thorogood M. Interventions for promoting physical activity.  
4 582 *Cochrane Database Syst Rev.* 2005(1):CD003180.  
5 583 13. Jong M, Mendez I, Jong R. Enhancing access to care in northern rural communities via  
6 584 telehealth. *Int J Circumpolar Health.* 2019;78(2):1554174.  
7 585 14. Maddison R, Rawstorn JC, Stewart RAH, et al. Effects and costs of real-time cardiac  
8 586 telerehabilitation: randomised controlled non-inferiority trial. *Heart.* 2019;105(2):122-  
9 587 129.  
10 588 15. Walter SD, Turner RM, Macaskill P, McCaffery KJ, Irwig L. Estimation of treatment  
11 589 preference effects in clinical trials when some participants are indifferent to treatment  
12 590 choice. *BMC Med Res Methodol.* 2017;17(1):29.  
13 591 16. Bherer L, Erickson KI, Liu-Ambrose T. Physical exercise and brain functions in older  
14 592 adults. *J Aging Res.* 2013;2013:197326.  
15 593 17. Liu-Ambrose T, Nagamatsu LS, Voss MW, Khan KM, Handy TC. Resistance training  
16 594 and functional plasticity of the aging brain: a 12-month randomized controlled trial.  
17 595 *Neurobiol Aging.* 2012;33(8):1690-1698.  
18 596 18. Ohman H, Savikko N, Strandberg TE, Pitkala KH. Effect of physical exercise on  
19 597 cognitive performance in older adults with mild cognitive impairment or dementia: a  
20 598 systematic review. *Dement Geriatr Cogn Disord.* 2014;38(5-6):347-365.  
21 599 19. Lautenschlager NT, Cox KL, Flicker L, et al. Effect of physical activity on cognitive  
22 600 function in older adults at risk for Alzheimer disease: a randomized trial. *JAMA.*  
23 601 2008;300(9):1027-1037.  
24 602 20. Colcombe S, Kramer AF. Fitness effects on the cognitive function of older adults: a  
25 603 meta-analytic study. *Psychol Sci.* 2003;14(2):125-130.  
26 604 21. Langlois F, Vu TT, Chasse K, Dupuis G, Kergoat MJ, Bherer L. Benefits of physical  
27 605 exercise training on cognition and quality of life in frail older adults. *J Gerontol B*  
28 606 *Psychol Sci Soc Sci.* 2013;68(3):400-404.  
29 607 22. Gates N, Fiatarone Singh MA, Sachdev PS, Valenzuela M. The effect of exercise training  
30 608 on cognitive function in older adults with mild cognitive impairment: a meta-analysis of  
31 609 randomized controlled trials. *Am J Geriatr Psychiatry.* 2013;21(11):1086-1097.  
32 610 23. Choi JH, Kim NJ. The effects of balance training and ankle training on the gait of elderly  
33 611 people who have fallen. *J Phys Ther Sci.* 2015;27(1):139-142.  
34 612 24. McAuley E, Wojcicki TR, Learmonth YC, et al. Effects of a DVD-delivered exercise  
35 613 intervention on physical function in older adults with multiple sclerosis: A pilot  
36 614 randomized controlled trial. *Mult Scler J Exp Transl Clin.* 2015;1:2055217315584838.  
37 615 25. Yogev-Seligmann G, Eisenstein T, Ash E, et al. Neurocognitive Plasticity Is Associated  
38 616 with Cardiorespiratory Fitness Following Physical Exercise in Older Adults with  
39 617 Amnesic Mild Cognitive Impairment. *J Alzheimers Dis.* 2021;81(1):91-112.  
40 618 26. Reijnders J, van Heugten C, van Boxtel M. Cognitive interventions in healthy older  
41 619 adults and people with mild cognitive impairment: a systematic review. *Ageing Res Rev.*  
42 620 2013;12(1):263-275.  
43 621 27. Ballesteros S, Prieto A, Mayas J, et al. Brain training with non-action video games  
44 622 enhances aspects of cognition in older adults: a randomized controlled trial. *Front Aging*  
45 623 *Neurosci.* 2014;6:277.  
46 624 28. Chapman SB, Aslan S, Spence JS, et al. Neural mechanisms of brain plasticity with  
47 625 complex cognitive training in healthy seniors. *Cereb Cortex.* 2015;25(2):396-405.  
48  
49  
50  
51  
52  
53  
54  
55  
56  
57  
58  
59  
60

- 1  
2  
3 626 29. Li KZ, Roudaia E, Lussier M, Bherer L, Leroux A, McKinley PA. Benefits of cognitive  
4 627 dual-task training on balance performance in healthy older adults. *J Gerontol A Biol Sci*  
5 628 *Med Sci.* 2010;65(12):1344-1352.
- 6 629 30. Hittmair-Delazer M, Semenza C, Denes G. Concepts and facts in calculation. *Brain.*  
7 630 1994;117 ( Pt 4):715-728.
- 8 631 31. Weiss EM, Siedentopf C, Hofer A, et al. Brain activation pattern during a verbal fluency  
9 632 test in healthy male and female volunteers: a functional magnetic resonance imaging  
10 633 study. *Neurosci Lett.* 2003;352(3):191-194.
- 11 634 32. Legault C, Jennings JM, Katula JA, et al. Designing clinical trials for assessing the  
12 635 effects of cognitive training and physical activity interventions on cognitive outcomes:  
13 636 the Seniors Health and Activity Research Program Pilot (SHARP-P) study, a randomized  
14 637 controlled trial. *BMC Geriatr.* 2011;11:27.
- 15 638 33. Coelho FG, Andrade LP, Pedrosa RV, et al. Multimodal exercise intervention improves  
16 639 frontal cognitive functions and gait in Alzheimer's disease: a controlled trial. *Geriatr*  
17 640 *Gerontol Int.* 2013;13(1):198-203.
- 18 641 34. Lawton MP, Brody EM. Assessment of older people: self-maintaining and instrumental  
19 642 activities of daily living. *Gerontologist.* 1969;9(3):179-186.
- 20 643 35. Desikan RS, Fan CC, Wang Y, et al. Genetic assessment of age-associated Alzheimer  
21 644 disease risk: Development and validation of a polygenic hazard score. *PLoS Med.*  
22 645 2017;14(3):e1002258.
- 23 646 36. Tan CH, Bonham LW, Fan CC, et al. Polygenic hazard score, amyloid deposition and  
24 647 Alzheimer's neurodegeneration. *Brain.* 2019;142(2):460-470.
- 25 648 37. Bherer L, Kramer AF, Peterson MS, Colcombe S, Erickson K, Becic E. Training effects  
26 649 on dual-task performance: are there age-related differences in plasticity of attentional  
27 650 control? *Psychol Aging.* 2005;20(4):695-709.
- 28 651 38. Bherer L, Kramer AF, Peterson MS, Colcombe S, Erickson K, Becic E. Testing the limits  
29 652 of cognitive plasticity in older adults: application to attentional control. *Acta Psychol*  
30 653 *(Amst).* 2006;123(3):261-278.
- 31 654 39. Bherer L, Kramer AF, Peterson MS, Colcombe S, Erickson K, Becic E. Transfer effects  
32 655 in task-set cost and dual-task cost after dual-task training in older and younger adults:  
33 656 further evidence for cognitive plasticity in attentional control in late adulthood. *Exp*  
34 657 *Aging Res.* 2008;34(3):188-219.
- 35 658 40. El-Kotob R, Giangregorio LM. Pilot and feasibility studies in exercise, physical activity,  
36 659 or rehabilitation research. *Pilot Feasibility Stud.* 2018;4:137.
- 37 660 41. Petersen RC, Smith GE, Waring SC, Ivnik RJ, Tangalos EG, Kokmen E. Mild cognitive  
38 661 impairment: clinical characterization and outcome. *Arch Neurol.* 1999;56(3):303-308.
- 39 662 42. Camicioli R, Majumdar SR. Relationship between mild cognitive impairment and falls in  
40 663 older people with and without Parkinson's disease: 1-Year Prospective Cohort Study.  
41 664 *Gait Posture.* 2010;32(1):87-91.
- 42 665 43. Davis JC, Best J, Hsu CL, Nagamatsu LS, Dao E, Liu-Ambrose T. Examining the effect  
43 666 of the relationship between falls and mild cognitive impairment on mobility and  
44 667 executive functions in community-dwelling older adults. *J Am Geriatr Soc.*  
45 668 2015;63(3):590-593.
- 46 669 44. Pothier K, Gagnon C, Fraser SA, et al. A comparison of the impact of physical exercise,  
47 670 cognitive training and combined intervention on spontaneous walking speed in older  
48 671 adults. *Aging Clin Exp Res.* 2018;30(8):921-925.

- 1  
2  
3 672 45. Montero-Odasso M, Ismail Z, Livingston G. One third of dementia cases can be  
4 673 prevented within the next 25 years by tackling risk factors. The case "for" and "against".  
5 674 *Alzheimers Res Ther.* 2020;12(1):81.  
6  
7 675 46. M Montero Odasso QA, R Camicioli, K Li, T Liu-Ambrose, L Middleton, and L Bherer.  
8 676 Preliminary results from the SYNERGIC trial: A multimodal intervention for mild  
9 677 cognitive impairment. *Innovation in Aging.* 2018;2(1):439-440.  
10 678 47. Cheng ST, Chow PK, Song YQ, et al. Mental and physical activities delay cognitive  
11 679 decline in older persons with dementia. *Am J Geriatr Psychiatry.* 2014;22(1):63-74.  
12 680 48. Sage MD, Almeida QJ. Symptom and gait changes after sensory attention focused  
13 681 exercise vs aerobic training in Parkinson's disease. *Mov Disord.* 2009;24(8):1132-1138.  
14 682 49. Sage MD, Almeida QJ. A positive influence of vision on motor symptoms during sensory  
15 683 attention focused exercise for Parkinson's disease. *Mov Disord.* 2010;25(1):64-69.  
16 684 50. Nagamatsu LS, Handy TC, Hsu CL, Voss M, Liu-Ambrose T. Resistance training  
17 685 promotes cognitive and functional brain plasticity in seniors with probable mild cognitive  
18 686 impairment. *Arch Intern Med.* 2012;172(8):666-668.  
19  
20 687 51. The Comprehensive Assessment of Neurodegeneration and Dementia (COMPASS-ND)  
21 688 Study. <https://ccna-ccnv.ca/compass-nd-study/>. Published 2020. Accessed.  
22  
23 689 52. Jessen F, Amariglio RE, van Boxtel M, et al. A conceptual framework for research on  
24 690 subjective cognitive decline in preclinical Alzheimer's disease. *Alzheimers Dement.*  
25 691 2014;10(6):844-852.

692

693

694 **Table 1.** Canadian Consortium on Neurodegeneration in Aging (CCNA) Criteria for Cognitively  
 695 Intact with risk factors, and Subjective and Mild Cognitive Impairment from COMPASS-ND<sup>51</sup>  
 696

| Group                                                     | Core Diagnostic Criteria                                                                                                                                                                 | Operationalized as                                                                                                                                                                                                                                                                                                                                                                                                              |
|-----------------------------------------------------------|------------------------------------------------------------------------------------------------------------------------------------------------------------------------------------------|---------------------------------------------------------------------------------------------------------------------------------------------------------------------------------------------------------------------------------------------------------------------------------------------------------------------------------------------------------------------------------------------------------------------------------|
| <b>Cognitively Intact (CI) with risk factors</b>          | Absence of SCI and/or MCI based on below definitions, with two or more known risk factors for dementia.                                                                                  | Not having SCI or MCI, and having at least two (2) of the following risk factors: <ul style="list-style-type: none"> <li>• Obesity</li> <li>• Hypertension</li> <li>• Diabetes</li> <li>• Cardiovascular disease</li> <li>• Physical inactivity</li> <li>• First-degree family history of dementia</li> <li>• Dyslipidemia</li> <li>• Poor sleep</li> <li>• Poor diet</li> </ul>                                                |
| <b>Subjective Cognitive Impairment (SCI)<sup>52</sup></b> | Self-experienced persistent decline in cognitive capacity in comparison with a previously normal status and unrelated to an acute event.                                                 | Answer “yes” to both of the following questions: “Do you feel like your memory or thinking is becoming worse?” and “Does this concern you?”                                                                                                                                                                                                                                                                                     |
|                                                           | Normal age-, sex-, and education-adjusted performance on standardized cognitive tests, which are used to classify mild cognitive impairment (MCI) or prodromal Alzheimer’s Disease (AD). | Global Clinical Dementia Rating (CDR) scale = 0, Logical Memory II above Alzheimer’s Disease Neuroimaging Initiative (ADNI) education-adjusted cutoffs ( $\geq 9$ for 16+ years of education; $\geq 5$ for 8-15 years of education; $\geq 3$ for 0-7 years of education); Alzheimer’s Disease Assessment Scale-Cognitive (ADAS-Cog) word list recall score $> 5$ ; Montreal Cognitive Assessment (MoCA) total score $\geq 25$ . |
| <b>Mild Cognitive Impairment (MCI)<sup>5</sup></b>        | Concern regarding a change in cognition.                                                                                                                                                 | Report from patient and/or informant of such.                                                                                                                                                                                                                                                                                                                                                                                   |
|                                                           | Impairment in one or more cognitive domains.                                                                                                                                             | One or more of the following: <ul style="list-style-type: none"> <li>• Logical memory below ADNI cutoffs (<math>\geq 9</math> for 16+ years of education; <math>\geq 5</math> for 8-15 years of education; <math>\geq 3</math> for 0-7 years of education).</li> <li>• ADAS-Cog word list recall <math>&lt; 6</math>.</li> <li>• MoCA score 13-24 inclusive.</li> <li>• Global CDR <math>&gt; 0</math>.</li> </ul>              |
|                                                           | Preservation of independence in functional abilities.                                                                                                                                    | Score $> 14/23$ on the Lawton-Brody Instrumental Activities of Daily Living (IADL) scale.                                                                                                                                                                                                                                                                                                                                       |



|  |               |                        |
|--|---------------|------------------------|
|  | Not demented. | Global CDR $\leq$ 0.5. |
|--|---------------|------------------------|

697

698

**Table 2.** General overview of active intervention exercise regimen structure.

| Section                       | Type of Exercise                                   | Duration (min)    |
|-------------------------------|----------------------------------------------------|-------------------|
| Warm Up                       | Marching in one place with arm swings for 1 minute | 1                 |
|                               | Dynamic Hamstring Stretching: 15 per side          | 1                 |
|                               | Shoulder Circles: 15 per direction                 | 1                 |
|                               | 15 Arm Reaches                                     | 0.5               |
|                               | Torso Twists: 15 per direction                     | 1                 |
|                               | Ankle Circles: 15 per direction per side           | 2                 |
|                               | Side Stepping for 1 minute                         | 1                 |
|                               | 15 Quarter Squats                                  | 1                 |
|                               | Total Warm Up Duration                             | 8                 |
| Break                         |                                                    | 1                 |
| 7 Strength Training Exercises | Chest                                              | 5                 |
|                               | Upper Back                                         | 5                 |
|                               | Bicep Curls                                        | 2.5               |
|                               | Abdominals                                         | 2.5               |
|                               | Mid/Lower Back                                     | 5                 |
|                               | Quadriceps                                         | 5                 |
|                               | Hamstrings                                         | 5                 |
|                               | Total Strength Training Duration                   | 30                |
| Break                         |                                                    | 3                 |
| Aerobic Exercise              | Alternating Video for Participants                 | 15                |
|                               | Total Aerobic Exercise Duration                    | 15                |
| Break                         |                                                    | 3                 |
| Cool Down                     | Quadriceps Stretch                                 | 0.5               |
|                               | Hamstring Stretch                                  | 0.5               |
|                               | Calf Stretch                                       | 0.5               |
|                               | 2 Hip Stretches                                    | 0.5               |
|                               | Static Torso Rotation                              | 0.5               |
|                               | Seated Side Bend                                   | 0.5               |
|                               | Back and Shoulder Stretch                          | 0.5               |
|                               | Chest Stretch                                      | 0.5               |
|                               | Triceps Stretch                                    | 0.5               |
|                               | Neck Stretch                                       | 0.5               |
|                               | Total Cool Down Duration                           | 5                 |
| <b>Total Time</b>             |                                                    | <b>Approx. 65</b> |

699

700

701 **Table 3.** General overview of control BAT regimen structure.

| Section                         | Type of Exercise                                        | Duration (min)   |
|---------------------------------|---------------------------------------------------------|------------------|
| Warm Up                         | Marching in one place with arm swings for 1 minute      | 1                |
|                                 | Dynamic Hamstring Stretching: 15 per side               | 1                |
|                                 | Shoulder Circles: 15 per direction                      | 1                |
|                                 | 15 Arm Reaches                                          | 0.5              |
|                                 | Torso Twists: 15 per direction                          | 1                |
|                                 | Ankle Circles: 15 per direction per side                | 2                |
|                                 | Side Stepping for 1 minute                              | 1                |
|                                 | 15 Quarter Squats                                       | 1                |
| Total Warm Up Duration          |                                                         | 8                |
| Break                           |                                                         | 1                |
| 7 Balance and Toning Activities | Standing with Feet Together + Tandem + Single Leg Stand | 10               |
|                                 | Core Contractions + Core & Arm Raises                   | 8                |
|                                 | Shoulder Retractions                                    | 3                |
|                                 | Isometric Quadriceps Strength                           | 3                |
|                                 | Seated Hamstring Curls                                  | 3                |
|                                 | Seated Arm Shake                                        | 3                |
|                                 | Total Balance and Toning Duration                       |                  |
| Break                           |                                                         | 3                |
| Stretching Exercise             | Alternating Video for Participants                      | 15               |
|                                 | Total Stretching Duration                               |                  |
| Break                           |                                                         | 3                |
| Cool Down                       | Quadriceps Stretch                                      | 0.5              |
|                                 | Hamstring Stretch                                       | 0.5              |
|                                 | Calf Stretch                                            | 0.5              |
|                                 | 2 Hip Stretches                                         | 0.5              |
|                                 | Static Torso Rotation                                   | 0.5              |
|                                 | Seated Side Bend                                        | 0.5              |
|                                 | Back and Shoulder Stretch                               | 0.5              |
|                                 | Chest Stretch                                           | 0.5              |
|                                 | Triceps Stretch                                         | 0.5              |
|                                 | Neck Stretch                                            | 0.5              |
| Total Cool Down Duration        |                                                         | 5                |
| <b>Total Time</b>               |                                                         | <b>Approx 65</b> |

702

703

704

705 **Figure Captions**

706

707 **Figure 1.** Design of the SYNERGIC@Home feasibility trial.

708 **Figure 2.** SPIRIT schedule of enrollment, interventions and assessments. Time points are:  $-t_2 = 4$   
709 weeks prior to allocation;  $-t_1 = 2$  weeks prior to allocation;  $t_0 =$  Baseline testing and allocation  
710 (T0);  $t_1 =$  first week of interventions;  $t_2 =$  last week of interventions;  $t_3 = 4$ mo follow-up  
711 assessment (T4);  $t_4 = 2$  weeks prior to 10mo follow-up;  $t_5 = 10$ mo follow-up assessment (T10).  
712 Interventions are 3x per week for 16 weeks ( $t_1-t_2$ ). [a] Pre-screening at  $-t_2$  consists of exclusion  
713 screening and inclusion screening not requiring assessment, such as clinical dementia status and  
714 risk. [b] Final screening at  $-t_1$  consist cognitive battery #1, diet, sleep and functional risk factors  
715 used to designate participants as not demented but having mild cognitive impairment, subjective  
716 cognitive impairment, or cognitively intact with 2 or more risk factors. [c] Cognitive battery #1  
717 ( $-t_1, t_3, t_5$ ) consists of: Telephone Cognitive Screen (TCogS); Full MoCA via Audio-Visual  
718 Conference; Lawton-Brody IADL; Cognitive Functional Composite (CFC-2) consisting of  
719 ADAS-Cog 3 Immediate Word Recall, Delayed Word Recall, and Orientation, Logical Memory  
720 I & II; Clinical Dementia Rating Scale (CDR), and Cognitive Functional Activities  
721 Questionnaire. [d] Cognitive battery #2 ( $t_0, t_3, t_5$ ) consists of: Oral Trail Making Test (Part A &  
722 B); Boston Naming Test; ADAS-Cog Word Recognition; DKEFS Phonemic Fluency Test and  
723 Semantic Fluency Test; WAIS III Digit Span Test; Digit Symbol Modalities Test-Oral Version.  
724 [e] Sleep and activity monitoring for 10 days prior to assessment time points ( $-t_1-t_0, t_2-t_3$  and  $t_4-t_5$ )  
725 using wrist worn Actigraph (GT9X) monitor. [f] Dual task gait battery ( $-t_1, t_3, t_5$ ) consists of:  
726 Usual Gait; Seated Dual Task; Dual Task Gait counting backwards by ones, naming animals, and  
727 counting backwards by sevens. <sup>g</sup>Exit survey completed at end of study or upon early withdrawal  
728 when possible. [h] Polygenic Hazard Score biomarkers assessed via saliva sample at any time  
729 point during study.

730

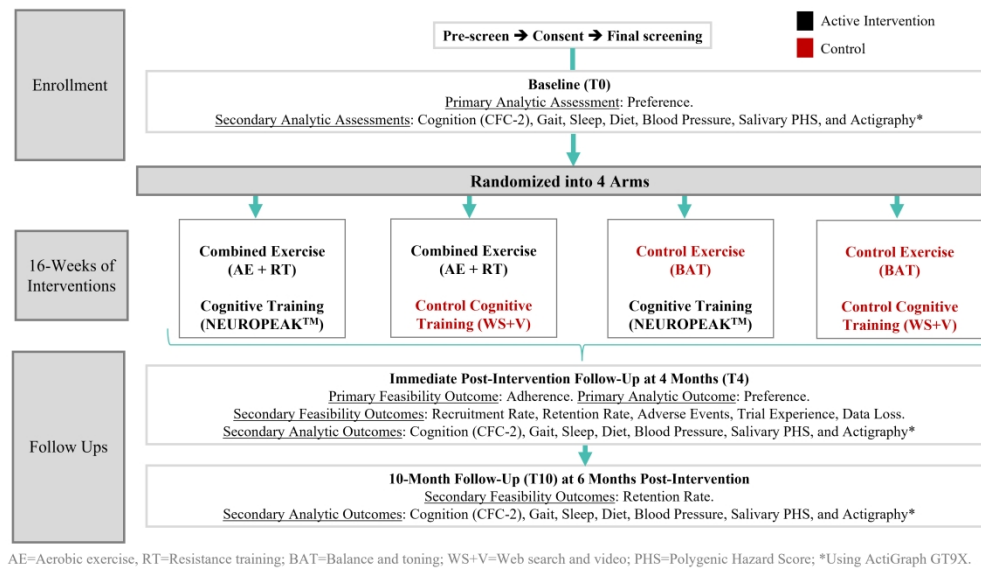

Design of the SYNERGIC@Home feasibility trial.

1158x658mm (96 x 96 DPI)

| TIMEPOINT                                            | STUDY PERIOD    |                 |                |                 |                |                |                |                            |                |     |
|------------------------------------------------------|-----------------|-----------------|----------------|-----------------|----------------|----------------|----------------|----------------------------|----------------|-----|
|                                                      | Enrollment      |                 | Alloc.         | Post-Allocation |                |                |                |                            |                | End |
|                                                      | -t <sub>2</sub> | -t <sub>1</sub> | t <sub>0</sub> | t <sub>1</sub>  | t <sub>2</sub> | t <sub>3</sub> | t <sub>4</sub> | t <sub>5</sub>             | t <sub>6</sub> |     |
| <b>ENROLLMENT:</b>                                   |                 |                 |                |                 |                |                |                |                            |                |     |
| <sup>a</sup> Pre-screen                              | X               |                 |                |                 |                |                |                |                            |                |     |
| Informed consent                                     | X               |                 |                |                 |                |                |                |                            |                |     |
| <sup>b</sup> Final screening                         |                 | X               |                |                 |                |                |                |                            |                |     |
| Allocation                                           |                 |                 | X              |                 |                |                |                |                            |                |     |
| <b>INTERVENTIONS:</b>                                |                 |                 |                |                 |                |                |                |                            |                |     |
| Arm 1: AE+RT + NEUROPEAK™                            |                 |                 |                | ←→              |                |                |                |                            |                |     |
| Arm 2: AE+RT + WS+V (control)                        |                 |                 |                | ←→              |                |                |                |                            |                |     |
| Arm 3: BAT (con.) + NEUROPEAK™                       |                 |                 |                | ←→              |                |                |                |                            |                |     |
| Arm 4: BAT (con.) + WS+V (con.)                      |                 |                 |                | ←→              |                |                |                |                            |                |     |
| <b>ASSESSMENTS:</b>                                  |                 |                 |                |                 |                |                |                |                            |                |     |
| <b>Primary feasibility outcomes</b>                  |                 |                 |                |                 |                |                |                |                            |                |     |
| Intervention adherence                               |                 |                 |                |                 |                | X              |                | X                          |                |     |
| <b>Secondary feasibility outcomes</b>                |                 |                 |                |                 |                |                |                |                            |                |     |
| Recruitment rate                                     |                 |                 |                |                 |                |                |                |                            |                | X   |
| Retention rate                                       |                 |                 |                |                 |                |                |                |                            |                | X   |
| Trial experience (1:1 interview)                     |                 |                 |                |                 |                |                |                | X                          |                |     |
| Adverse events                                       |                 |                 |                | ←→              |                |                |                |                            |                |     |
| Data loss                                            |                 |                 |                |                 |                |                |                |                            |                | X   |
| <b>Primary analytic outcomes</b>                     |                 |                 |                |                 |                |                |                |                            |                |     |
| Preference Questionnaire                             |                 |                 | X              |                 |                | X              |                |                            |                |     |
| <b>Secondary analytic outcomes</b>                   |                 |                 |                |                 |                |                |                |                            |                |     |
| <sup>c</sup> Cognitive battery #1                    | X               |                 |                |                 |                | X              |                | X                          |                |     |
| <sup>d</sup> Cognitive battery #2                    |                 |                 | X              |                 |                | X              |                | X                          |                |     |
| Mediterranean Diet Assessment                        | X               |                 |                |                 |                | X              |                | X                          |                |     |
| Eating Pattern Self-Assessment                       |                 |                 | X              |                 |                | X              |                | X                          |                |     |
| Vitamin D Intake Questionnaire                       |                 |                 | X              |                 |                | X              |                | X                          |                |     |
| <sup>e</sup> Sleep monitoring (Actigraphy)           |                 | ←→              |                |                 | ←→             |                | ←→             |                            |                |     |
| Pittsburgh Sleep Quality Index                       | X               |                 |                |                 |                | X              |                | X                          |                |     |
| Work and Sleep Diary                                 |                 | ←→              |                |                 |                |                |                |                            |                |     |
| <sup>e</sup> Activity monitoring (Actigraphy)        |                 | ←→              |                |                 | ←→             |                | ←→             |                            |                |     |
| Clinical Frailty Scale                               | X               |                 |                |                 |                | X              |                | X                          |                |     |
| Generalized Anxiety Disorder                         | X               |                 |                |                 |                | X              |                | X                          |                |     |
| Geriatric Depression Scale                           | X               |                 |                |                 |                | X              |                | X                          |                |     |
| Falls Calendar                                       |                 | ←→              |                |                 |                |                |                |                            |                |     |
| Physical Activity Scale for the Elderly              |                 |                 | X              |                 |                | X              |                | X                          |                |     |
| Life Space Questionnaire                             |                 |                 | X              |                 |                | X              |                | X                          |                |     |
| <sup>f</sup> Dual task gait battery                  |                 |                 | X              |                 |                | X              |                | X                          |                |     |
| One Minute Sit to Stand Test                         |                 |                 | X              |                 |                | X              |                | X                          |                |     |
| Short Form 36                                        |                 |                 | X              |                 |                | X              |                | X                          |                |     |
| Get Active Questionnaire                             | X               |                 |                |                 |                |                |                |                            |                |     |
| COVID-19 Questionnaire                               |                 |                 | X              |                 |                |                |                |                            |                |     |
| Technology Ability and Use                           |                 |                 | X              |                 |                |                |                |                            |                |     |
| STOFHLA Test                                         | X               |                 |                |                 |                |                |                |                            |                |     |
| <sup>g</sup> Exit survey or early withdrawal debrief |                 |                 |                |                 |                |                |                | At end or early withdrawal | X              |     |
| <sup>h</sup> Polygenic Hazard Score                  |                 |                 |                |                 |                |                |                | Any time during study      |                |     |

SPIRIT schedule of enrollment, interventions and assessments. Time points are: -t<sub>2</sub> = 4 weeks prior to allocation; -t<sub>1</sub> = 2 weeks prior to allocation; t<sub>0</sub> = Baseline testing and allocation (T<sub>0</sub>); t<sub>1</sub> = first week of interventions; t<sub>2</sub> = last week of interventions; t<sub>3</sub> = 4mo follow-up assessment (T<sub>4</sub>); t<sub>4</sub> = 2 weeks prior to 10mo follow-up; t<sub>5</sub> = 10mo follow-up assessment (T<sub>10</sub>). Interventions are 3x per week for 16 weeks (t<sub>1</sub>-t<sub>2</sub>). [a] Pre-screening at -t<sub>2</sub> consists of exclusion screening and inclusion screening not requiring assessment, such as clinical dementia status and risk. [b] Final screening at -t<sub>1</sub> consist cognitive battery #1, diet, sleep and functional risk factors used to designate participants as not demented but having mild cognitive impairment, subjective cognitive impairment, or cognitively intact with 2 or more risk factors. [c] Cognitive battery #1 (-t<sub>1</sub>, t<sub>3</sub>, t<sub>5</sub>) consists of: Telephone Cognitive Screen (TCogS); Full MoCA via Audio-Visual Conference; Lawton-Brody IADL; Cognitive Functional Composite (CFC-2) consisting of ADAS-Cog 3 Immediate Word Recall, Delayed Word Recall, and Orientation, Logical Memory I & II; Clinical Dementia Rating Scale (CDR), and Cognitive Functional Activities Questionnaire. [d] Cognitive battery #2 (t<sub>0</sub>, t<sub>3</sub>, t<sub>5</sub>) consists of: Oral Trail Making Test (Part A & B); Boston Naming Test; ADAS-Cog Word Recognition; DKEFS Phonemic Fluency Test and Semantic Fluency Test; WAIS III Digit Span Test; Digit Symbol Modalities Test-

1  
2  
3 Oral Version. [e] Sleep and activity monitoring for 10 days prior to assessment time points (-t1-t0, t2-t3  
4 and t4-t5) using wrist worn Actigraph (GT9X) monitor. [f] Dual task gait battery (-t1, t3, t5) consists of:  
5 Usual Gait; Seated Dual Task; Dual Task Gait counting backwards by ones, naming animals, and counting  
6 backwards by sevens. gExit survey completed at end of study or upon early withdrawal when possible. [h]  
7 Polygenic Hazard Score biomarkers assessed via saliva sample at any time point during study.  
8  
9  
10  
11  
12  
13  
14  
15  
16  
17  
18  
19  
20  
21  
22  
23  
24  
25  
26  
27  
28  
29  
30  
31  
32  
33  
34  
35  
36  
37  
38  
39  
40  
41  
42  
43  
44  
45  
46  
47  
48  
49  
50  
51  
52  
53  
54  
55  
56  
57  
58  
59  
60

## Appendix A:

## Intervention Preference Questionnaire

Page 1 of 1

1. Given what you know *at this point in time*, please indicate how interested you are in each of the following interventions, by placing a mark along the line between no interest and strong interest.

Rate your level of interest in **physical exercise** as a way to improve your brain health

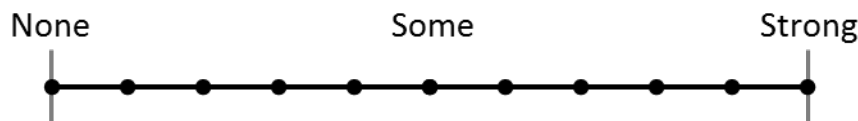

Rate your level of interest in **brain exercise** as a way to improve your brain health

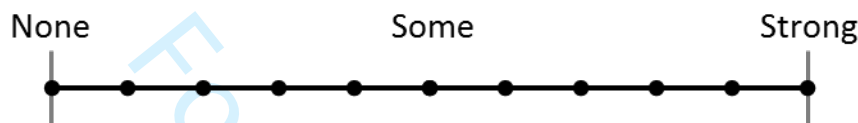

2. Please rate your preference between physical exercise and brain exercise training. Select the response below that best describes your preference at this point in time.

- Strong preference for **physical exercise**
- Slight preference for **physical exercise**
- No preference
- Slight preference for **brain exercise**
- Strong preference for **brain exercise**

3. If you have selected that you prefer one of the interventions over the other, please indicate *why* you prefer it. If you have an equal preference, then you may skip this question.

4. Are there other interventions (besides physical exercise and cognitive training) that you would prefer? If so, please describe them below:

5. Please indicate if you have any additional comments pertaining to the interventions in this study below:

## Appendix B:

**GENERAL INCLUSION CRITERIA**  
**Dementia Risk Factors**

Page 1 of 1

The following is a list of the dementia risk factors for cognitively intact older adults included for this study and their definitions. Please review with the candidate and indicate the presence of each.

| <b>RISK FACTOR:</b>                     | <b>DEFINITION</b>                                                                                                                                                                                                                 | <b>PRESENCE</b>                                          |
|-----------------------------------------|-----------------------------------------------------------------------------------------------------------------------------------------------------------------------------------------------------------------------------------|----------------------------------------------------------|
| Obesity                                 | Body Mass Index > 30 kg/m <sup>2</sup> (derived from NIH Metric BMI Calculator)<br><br>Weight (kg): _____<br>Height (m): _____<br>BMI: _____                                                                                      | YES <input type="checkbox"/> NO <input type="checkbox"/> |
| Hypertension                            | Hypertension (documented Systolic Blood Pressure > 140 mm Hg), OR<br>Physician diagnosis of hypertension, OR<br>Treatment for hypertension, OR<br>Other approaches to treatment (e.g. diet, exercise))                            | YES <input type="checkbox"/> NO <input type="checkbox"/> |
| Diabetes                                | Physician diagnosis of diabetes, OR<br>Medications used for the treatment of diabetes, OR<br>Other approaches to treatment (diet or exercise)                                                                                     | YES <input type="checkbox"/> NO <input type="checkbox"/> |
| Cardiovascular Disease                  | Physician diagnosis of:<br>Angina,<br>Myocardial infarction,<br>Coronary revascularization or other arterial revascularization,<br>Stroke,<br>Transient Ischemic Attack (TIA),<br>and/or peripheral vascular disease.             | YES <input type="checkbox"/> NO <input type="checkbox"/> |
| Dyslipidemia                            | Dyslipidemia (documented total cholesterol > 6.5 mmol/L), OR<br>Physician diagnosis of hypercholesterolemia, OR<br>Treatment for hypercholesterolemia, OR<br>Other approaches to treatment (e.g. diet, exercise))                 | YES <input type="checkbox"/> NO <input type="checkbox"/> |
| Poor Sleep                              | PSQI score of 6 or more = YES.<br><br>PSQI score: _____                                                                                                                                                                           | YES <input type="checkbox"/> NO <input type="checkbox"/> |
| Poor Diet                               | MDA-14 score of 7 or less on a scale of 14 =YES.<br><br>MDA-14 score: _____                                                                                                                                                       | YES <input type="checkbox"/> NO <input type="checkbox"/> |
| Abnormal Dual Task Gait                 | A reduction in gait speed by 20% or more on the Dual Task Gait Test compared to the Non Dual Task gait speed = YES.<br><br>Non Dual Task Gait Speed (m/sec): _____<br>Dual Task Gait Speed (m/sec): _____<br>Reduction (%): _____ | YES <input type="checkbox"/> NO <input type="checkbox"/> |
| Physical Inactivity                     | Defined as inactive, whereby active is defined as engaging in a minimum of 20-30 minutes of physical activity causing sweating and breathlessness, at least two times per week                                                    | YES <input type="checkbox"/> NO <input type="checkbox"/> |
| First-degree family history of dementia | First-degree family history of dementia (parents, siblings, or children)                                                                                                                                                          | YES <input type="checkbox"/> NO <input type="checkbox"/> |
|                                         | <b>TOTAL YES =</b>                                                                                                                                                                                                                | <b>SCORE _____</b>                                       |



**Appendix C:****CONSENT TO PARTICIPATE AS A PARTICIPANT IN A CLINICAL RESEARCH TRIAL****Study Title**

SYNchronizing Exercises, Remedies in Gait and Cognition at Home: Feasibility of a home-based double-blind randomized controlled trial to improve gait and cognition in individuals at risk for dementia

**Principal Investigators****Dr. Chris A. McGibbon, PhD**

Faculty of Kinesiology and Institute of Biomedical Engineering,  
University of New Brunswick, New Brunswick, Canada

**Dr. Pamela Jarrett, MD FRCPC FACP**

Department of Geriatric Medicine, Horizon Health Network,  
Dalhousie Medicine New Brunswick, Saint John, New Brunswick Canada

**Dr. Grant Handrigan, PhD**

School of Kinesiology and Recreation, Faculty of Health Sciences and Community Services,  
Université de Moncton, New Brunswick, Canada

**Dr. Ludivine Chamard-Witkowski, MD**

Department of Neuroscience, Dr. Georges-L.-Dumont University Hospital Centre, Moncton, New  
Brunswick, Canada

**Dr. Manuel Montero-Odasso, MD, PhD, FRCPC**

Schulich School of Medicine & Dentistry, London, Ontario, Canada; Departments of Medicine  
(Geriatrics) and of Epidemiology and Biostatistics, University of Western Ontario, London, Ontario,  
Canada

## LETTER OF INFORMATION AND PARTICIPANT INFORMED CONSENT FORM

You are invited to participate in a research project assessing the feasibility of administering various interventions such as exercise and cognitive training (e.g. puzzles) at home through video conferencing. We hope that in addition to learning how feasible it is to do a research study entirely at home, we can help improve memory in older adults with our interventions.

This consent form contains information that will help you to decide whether you wish to participate in this study. The decision to take part in this study is voluntary. It is important that you understand why this study is being conducted and what it will involve. Please read this form carefully and ask any questions you may have. You may choose to discuss this study with your family, friends, family doctor, and any of the research team members.

### INTRODUCTION AND BACKGROUND

There is currently an ongoing study (the SYNERGIC trial) taking place across Canada, in which various interventions are being tested with individuals who are at risk for dementia. This ongoing study has been funded by the Canadian Consortium on Neurodegeneration and Aging (CCNA) which is a pan-Canadian research initiative aimed to better understand cognitive decline in aging and dementia syndromes. The goal is to develop a clear understanding of how to best prevent the progression of memory problems leading to dementia in older adults. To date, the results are very promising.

This study that you are being asked to participate in—SYNERGIC@Home—is an extension of the SYNERGIC trial that will allow you to participate in a home-based program that will use an online virtual platform called *Zoom for Healthcare*. This study is part of the *New Brunswick Brain Health Initiative: Preventing Alzheimer's through Lifestyle Modification* (NB-PALM), funded by the Healthy Seniors Pilot Projects, Public Health Agency of Canada and the Province of New Brunswick.

### POPULATION UNDER STUDY

We are interested in studying older adults living in the community in New Brunswick who are at risk for developing dementia. Individuals between 60 and 90 years of age who have two or more risk factors for dementia, **OR** Subjective Cognitive Impairment (SCI) **OR** Mild Cognitive Impairment (MCI) are eligible to be enrolled in this study. Currently, there are no medications approved that will reduce the risk of developing dementia for persons with risk factors, SCI or MCI. Evidence suggests that some types of physical exercise and cognitive training activities (e.g. games, puzzles) may slow memory decline. The SYNERGIC@Home study will examine specifically whether physical exercise coupled with cognitive training is effective in slowing the rate of memory decline in the study group.

### DESCRIPTION OF STUDY

This study, which will take place over a 10-month timeframe, is to learn about the role of certain types of exercises paired with cognitive training in delaying or preventing decline in memory. Initially, there will be assessments to evaluate your current level of cognition, mobility and overall function. If you are eligible to participate, you will be randomly assigned (by chance) to one of four groups. This will be followed by sixteen weeks of exercise and cognitive training sessions done in your home three times a week. The time required to complete each intervention session will be approximately 90 minutes.

## CRITERIA FOR PARTICIPATION

### Inclusion Criteria

To participate in this study, you must:

- Be between 60 - 90 years of age.
- Live in your own home/apartment in the community.
- Have Internet access; a home computer and / or a laptop; access to and able to send and receive emails
- Able to speak, write and understand English or French
- Able to complete the scheduled home-based sessions: assessments with research staff, physical and cognitive training exercises and other study procedures.
- Able to walk at least 10 m (or about 32 feet) independently with or without a walking aid.
- Have eyesight and hearing abilities with or without aids to participate in the required exercises and procedures.
- Have a diagnosis of Mild Cognitive Impairment (MCI) OR Subjective Cognitive Impairment (SCI).
- Have no problems with cognition AND have a history of two or more of the following risk factors:
  - Obesity
  - Hypertension/High blood pressure
  - Diabetes
  - Cardiovascular disease
  - Physical inactivity
  - First-degree family history of dementia (parents, children, siblings)
  - High cholesterol
  - Poor sleep
  - Poor diet

### Exclusion Criteria

There are certain conditions that will **exclude** you from participating in the study, including the presence of one or more of the following:

- A diagnosis of Dementia.
- Living in Nursing Homes or Adult Residential Facilities (Special Care Homes).
- Serious underlying disease, which in the opinion of the study physician, may prevent you from safely participating in the interventions required for the study.
- Have had surgery within the last two months or have planned surgery in the upcoming 12 months that could interfere with vision, hearing or mobility or any other ability to participate.
- Have a history of intracranial surgery.
- Regularly taking benzodiazepines.
- Presence of ongoing significant mental health issues.
- Presence of ongoing drug/alcohol dependency.
- Parkinsonism or any neurological disorder with residual motor deficits (e.g. stroke with motor deficit)
- Active musculoskeletal disorders (e.g. severe osteoarthritis of lower limbs) or history of knee/hip replacement affecting walking.
- Severe visual and/or auditory impairment, which according to the study physician, prevents participation in the study.
- Intention to enroll in other similar clinical trials during the same time period.
- Current and ongoing participation in an exercise program involving aerobic exercise and / or resistance training two or more times per week in the previous 6 months.

## PARTICIPATION REQUIREMENTS

The following is a list of what you will be doing as a participant in our study. Detailed explanations are provided later in this consent form.

## SCREENING AND CLINICAL CASE CONFERENCE SESSIONS

You will complete screening and clinical case conference sessions over a four-week period. You will meet with research staff who will administer initial tests and gather information. The purpose of this screening assessment is to determine your eligibility to participate and ensure that it is safe and in the best interest of your health and well-being to do so.

Screening includes:

1. A **clinical screening** session. One of our research staff will connect with you through *Zoom for Healthcare* and go through some questionnaires assessing your medical history, your memory and thinking. One of these memory assessments must be completed by a study partner (i.e., spouse, a close friend or family member explained later in the consent) if you can provide one.
2. **Clinical Case Conference**. The study physician and members of the research team who you have met during the screening sessions will meet with you to review your medical history, results of the assessments and confirm your eligibility to participate in the study.

## DETAILS OF STUDY PROCEDURES

Participating in this home-based study will require home WIFI / Internet access as well as a laptop or desktop computer. For the entire study, you will have one-on-one contact with our trained research staff members. We recognize that others you know may also be study participants. We ask that you not discuss the details of your participation or “compare notes” about the particular exercises and cognitive training that you are completing if you know other participants.

The following assistance will be provided:

- **Technical Support for Connecting to Zoom for Healthcare**. Prior to initiating the study, we will call you and work with you step by step in getting *Zoom for Healthcare* set up on your computer.
- **Cognitive Training**. We will connect with you through phone or *Zoom for Healthcare* to set up this training.
- **Exercise Training**. During the exercise training, a certified exercise physiologist will connect with you through *Zoom for Healthcare* to assist and monitor you to make sure you are supported and safe.

## Intervention Sessions

You will be randomly assigned (by chance) to one of four groups within the study. Each will include some type of exercise paired with cognitive training. You will be asked to participate in this portion of the study three times a week for four months (16 weeks). It is important you know that we will provide you with any equipment (explained later in this consent) you may need to perform both the cognitive and exercise training.

- **Cognitive Training**. At each session, you will complete 30 minutes of cognitive training,

which will include doing tasks on the computer or tablet to develop skills that are cognitively stimulating.

- **Exercise Training.** After each cognitive training portion, you will complete 60 minutes of exercise training which will be fully supervised by a trained and certified exercise physiologist who will supervise your exercise training by watching and guiding you through *Zoom for Healthcare*.

As we will be testing the effect of a combination of exercises and cognitive training on slowing memory decline or improving memory, we ask that you do not engage in any additional physical or cognitive exercises that you do not typically do daily. For example, if you walk every day you will continue to do so. However, participating in a structured, routine program such as Zumba® or a program that is trainer-led and occurs two to three days of the week, will exclude you from the study. Additionally, you should not engage in any cognitive training exercises outside of your daily activities. If you do crossword puzzles, or activities such as Sudoku™, you may continue to do so.

## Assessment Sessions

In order to test whether the interventions help improve your memory, we will conduct assessment sessions at three separate time points: 1) Baseline 2) Immediate post-intervention follow-up and 3) Six-month post-intervention.

These assessments include some tests of memory, attention, executive functioning (your ability to think and reason) and some assessments of how you walk (your gait) as well as measuring how well you perform simple tasks (such as saying words or doing calculations) while walking a short distance in your home. The time required to complete both types of assessments is approximately 3 hours, scheduled on a date / time that is convenient for you. (Each session is approximately 1 ½ hours.) You will have the opportunity to take breaks between the testing as required. Our research team members will help with you throughout the entire process.

### Baseline

- A **clinical assessment** (your first testing session) testing. Health history, family medical history, memory and thinking, diet and mood.
- An **activity assessment** testing your mobility, overall functional ability.

### Immediate post-intervention follow-up (after you complete the 16-week intervention)

- A **clinical assessment** (within one week after completing the 4-month intervention) testing your memory and thinking.
- An **activity assessment** testing your mobility, overall functional ability.

### Six-month post-intervention follow-up

- A **clinical assessment** (to ensure that the effects of the intervention have been sustained) testing your memory and thinking.
- An **activity assessment** testing your mobility, overall activity.

## Activity Monitoring

After your screening assessment, we will ask you to wear an activity monitor (provided to you) to monitor your usual physical activity level and sleep patterns. The activity monitor will attach to your wrist like a watch and it can be worn at all times except when bathing. These activity monitors are very ordinary looking, no different than a wristwatch. You will be asked to wear this for 10 days, prior to each of the three assessment session time points (baseline, immediate post-intervention follow-up and six-month post-intervention follow-up). We will ask you to maintain your usual daily activities and to please not do anything physically out of the ordinary that is not required of you. After completing each of the 10 days of wearing the activity monitor, you will return it to the study site using stamped, addressed packages we will provide to you.

## Falls Calendar

At the beginning of the study you will be given a calendar for you to record every day whether you experienced a fall. If you do have a fall, there is a space at the back of the sheet where you can provide more details about the fall (where you were, what you were doing, whether you were injured). This is one way that we can monitor your health and safety during this study. You will complete this calendar for the duration of the study; completing this calendar should take no more than 5 minutes on any given day.

## Study Care Partner

We encourage you to include a study care partner such as a spouse, close friend, or a relative. Your study care partner's role will be to answer some questions about your memory and to assist you to complete some questionnaires. This will occur at three assessment sessions (baseline, immediate post-intervention follow-up and six-month post-intervention follow-up). The study partner will sign their own consent form for participation in the study as your study care partner. If you do not have a study care partner, you will not be excluded from the study unless the study physician determines that a care partner is necessary.

## Participant Questionnaire and Interview

Following completion of your 4-month (16 week) study intervention, we will send you a short questionnaire to better understand your experience as a participant in this home-based study. Once you complete it, you will either scan and return it by email or mail it to a research team member using a self-addressed, stamped envelope we will provide you.

After your six-month post-intervention follow-up assessment, we will contact you to arrange a time for you to participate in a one on one interview with a research team member. The purpose is to collect information about your ideas and opinions regarding your experience as a participant in this study. This information will provide us with important feedback about improvements we can make in conducting future home-based research studies involving exercise and cognitive training.

## Saliva Sample

Your saliva contains genetic content known as DNA, or deoxyribonucleic acid which is an identifiable biomarker or biological element that can be specifically linked to normal or abnormal biological processes (i.e. dementia). Being able to identify these biomarkers in individuals could be greatly advantageous, since it would allow the early detection of disease by using relatively non-invasive methods (detection by saliva). The test that will be conducted on your saliva sample is currently not a standard medical diagnostic test that is used in clinical care today. This test is currently being done for research purposes only.

To obtain your saliva, we will send you a saliva sample collection kit. During the sample collection process, you will be assisted by a research team member on how to properly collect, store, and return your sample to the laboratory. Using a stamped, addressed container your sample will be sent to the Clinical Genomics Centre, Mount Sinai Hospital, 600 University Ave, Toronto, Ontario and be processed under the guidance of Dr. Kathy Siminovitch. The return address on this sample will be University of New Brunswick Synergic@Home to maintain your confidentiality. Once the laboratory receives your sample, it will be properly stored in the research laboratory with labels that contain only the date and time of collection and your study identification number to avoid having any personal or identifying information linked with your sample. Providing a saliva sample is optional. You may decline to provide a sample and continue to participate in the study.

Saliva samples are sometimes kept for future research through a process called biobanking. Sample biobanking is important for creating new knowledge through future research that will use existing genetic material that has been collected from participants in numerous research studies who have given consent to have their genetic material stored. However, only participants who consent to biobanking their sample for future studies will have their sample analyzed for other purposes. Access to these samples will be regulated by the Biological Sample Access Committee which is made up of members of Canadian Consortium on Neurodegeneration in Aging.

At this time, the processes required for biobanking saliva are not determined. When they become available, if you agreed, we will discuss this further with you to see if you are interested. If you are interested, you will need to sign a separate consent for biobanking at that time and that specific research activity will be explained to you.

## Study Equipment and Materials

Once your eligibility has been decided, research staff will provide you with all the necessary items for this home-based program. We will properly and thoroughly sanitize all items prior to delivery through a secure courier or postal delivery service. Please note that some items are yours to keep, while others are to be returned to the study site using self-addressed, stamped packages we will provide to you.

Items that you will receive include the following:

- **Basic Exercise Equipment.** These items are specifically for the exercise training portion of the study and they are yours to keep.
- **Measuring Tape.** This is a simple measuring tape that you may use to take measurements such as your waist circumference as well as the distance of space available in your home to walk for the gait assessments (described below).
- **An Activity Monitor.** This is a small simple device that looks like a watch, is very comfortable to wear, and can be worn on your wrist or hip. You will be asked to wear it on your wrist or hip for the first 10 days prior to each of your three assessments. The activity monitor will measure your walking speed, your steps, and your sleep cycle. This will help us monitor your progress throughout the study. After you complete each of the 10 - day cycles of wearing the activity monitor, you will return it using the self-addressed, stamped package we will provide. Returns will be made through a secure courier or postal delivery service.
- **A Blood Pressure Device.** We will provide you with a simple device that will measure your blood pressure and heart rate during study assessment and intervention sessions. At the end of the study, you will return the blood pressure device using the self-addressed, stamped package we will provide.
- **A Saliva Kit.** This kit will be given to you at the outset of the study and includes a small

plastic tube in which you will provide a small amount of your saliva.

- **A Tablet Device.** Depending on which study group you are a member of we may need to loan you a tablet device to complete the study interventions. Upon completion of the study, the tablet will be returned to the research site, using the self-addressed, stamped package we will provide to you.

## COVID-19 Precautions

Considering the COVID-19 pandemic of 2020, many closures have taken place, forcing some participation in research studies to take place remotely. Part of the motivation for implementing a home-based program is because we are committed to ensuring that you are safe. All materials will be thoroughly sanitized using disinfectant sprays and wipes. At all times we will continue to adhere to proper sanitization practices when transporting and delivering the study materials to your home. In particular, the activity monitor will be thoroughly sanitized.

### Delivery of Study Materials to Your Home

Any required study documents, materials, devices / equipment you need will be delivered to your home by a secure courier or postal delivery service (such as FedEx) If we cannot arrange for delivery this way, a drop-off will be arranged to occur at an agreed-upon location.

### Return of Study Materials from Your Home

We will arrange for the return of the equipment and materials to our research site. It is important to note that the activity monitor will be returned after each of the three activity monitoring sessions. If you are unable to return the equipment by mail, arrangements will be made by a member of the research team for it be picked up at an agreed upon location.

### Setting Up Video Calls from Home

To help set you up *Zoom for Healthcare*, a member of the research team will schedule a call with you once you have received all your study materials and equipment. We will go through the process step by step with you to ensure that *Zoom for Healthcare* works properly.

## POTENTIAL BENEFITS OF PARTICIPATION

While there is no guarantee that you will personally benefit from participating in this study, exercises have been demonstrated to benefit memory and cognitive function. Being a part of a research study such as the one described here where you will be monitored has also been associated with cognitive improvement in participants. Your participation will help researchers advance knowledge in the area of memory and mobility in older adults. Beyond this, there are no direct benefits to you from participating in this study.

## POTENTIAL RISKS OF PARTICIPATION

The risks associated with participation in the SYNERGIC@Home study are minimal. Below, we have outlined the risks associated with each procedure in the study.

**Exercise Training.** Your participation in this research should not pose any additional medical risk to you. The study physician and certified exercise physiologist will do their best to ensure that the risks to you are minimized. If you experience any adverse symptoms while exercising, there will be a certified exercise physiologist monitoring you remotely and all appropriate measures will be followed



to maximize your safety. A Participant's Manual that details your exercise training, safety and what to do in the event of any adverse symptoms will be shared and reviewed with you prior to engaging in exercise. We do not expect major adverse symptoms, but in case this situation occurs while exercising and requires immediate medical attention, be informed that the Research Assistant may have to call 911 for your safety. It is very important that you follow the directions for the exercises and heed the advice of the research team.

**Cognitive Training.** There are no known risks associated with participation in cognitive training. However, you may experience some frustration, which is normal, as you complete some cognitive training tasks.

**Risks of Memory Testing and Mood Assessments:** Repeated testing and questions about your mental status may be slightly frustrating or produce fatigue and boredom. Some questions may start distressing feelings or memories. If you feel distressed while completing the questions or testing, the research staff are there to assist to you and if you need a break, that will be accommodated.

**Risks of Physical Activity and Sleep Recordings:** There are no known medical risks to you from using the activity monitor to record your sleep and daily activity. However, one possible side effect is minor discomfort from wearing the activity monitoring device, which would be like wearing a wristwatch. It is very important not to wear the activity monitor while bathing, swimming or near water such as washing dishes.

## **VOLUNTARY PARTICIPATION AND WITHDRAWAL**

Participation in this research is voluntary. You have the right to refuse to participate. You may withdraw from the study at any time without having to justify your reason Your withdrawal will have no impact on your future health care. If you choose to withdraw, we will ask you for consent to retain your saliva samples and information conducted during the study, if you provided one up to this point. If you choose to withdraw your information that has been collected for purposes of this study, it will be removed. However, it should be noted that if this information has been used for scientific publications or presentations, it cannot be removed from those documents. It is important to know that you won't be individually identified in those publications or presentations. Once you have requested your information to be removed, it will no longer be included in future analysis or used for future publications and/or presentations.

## **PRIVACY AND CONFIDENTIALITY**

### **Confidentiality**

All research materials that would identify you will be held in strict confidence and, to the extent permitted by the applicable laws and/or regulations, will not be shared with others or made publicly available. If you agree to participate in this study, you will be assigned a unique identification number that will be used on all the documents related to this study. This unique number will be linked to your name and contact information on a "master list" of participants. This master list will be kept separately from the other research information in a locked and password secured format at the University of New Brunswick. The audio and video recordings will be stored at the University of New Brunswick on a secure SharePoint server and accessible only to approved research team members. All information collected, except for the master list, will be kept for a period of 7 years. Paper documents will be kept under lock and key in the Research Coordinators' offices for the duration of the study. These paper documents will be shredded by confidential shredder at the end of the study. A digital copy of the study records will be maintained for future analyses. Computerized databases will be password

protected. For the analysis, the principal investigators will only have access to your de-identified information and will not be able to identify you personally. The results of this study could lead to scientific or professional publications. In any of these cases, no personally identifiable information will be shared or published.

### **Zoom Sessions and Audio Recording**

Our research team will take all necessary precautions to protect your privacy throughout the entire study. *Zoom for Healthcare* video calls will not be conducted without your consent and will be completed by trained research staff in a private location (i.e., in a room by themselves with a closed door and signage to avoid entry by another person). Each video session will only be shared with you as the participant. All research staff will be connected to secure internet connections with secure password protection.

During assessments, we may record the session so we can check to ensure that we have recorded your answers correctly. These recordings will be stored in a secure research facility (i.e., university and / or hospital network drive), accessible only to approved research team members. They will not be accessed by anyone outside of the research team. Once we have recorded the information from each session, we will delete the recordings. Because the recordings reveal identifiable information (including your face and voice), we will never share, upload, or distribute them to any outside parties in any format. For information pertaining to the security and privacy features within the *Zoom for Healthcare* platform, please see <https://zoom.us/security>.

### **Data Storage**

Upon completion of the study, all data collected in paper form with the unique identification numbers will be uploaded to the Longitudinal Online Research and Imaging System (LORIS) system. This is a controlled access database located at McGill Centre for Integrative Neuroscience, situated on the campus of McGill University, Montreal, Quebec. LORIS meets international security and safety standards. There are numerous safeguards in place to keep your information confidential. In particular: your personal identifiers will be removed (e.g., name, date of birth, etc.); your data will be coded using a unique identification number; and stringent security measures will prevent unauthorized access or misuse.

CCNA is committed to advancing future research throughout Canada by developing a data repository that is accessible to other CCNA researchers. Data from this research study, with all the identifying information removed, will be made available to researchers who are approved by a data oversight committee operated by CCNA.

### **COMPENSATION FOR PARTICIPATION**

In recognition of your participation in this study we are offering you two gift cards totaling \$100. A gift card of \$50 will be sent to you by mail following the immediate post- intervention follow-up assessment. A second gift card of \$50 will be sent to you by mail after you have completed the six - month follow up assessment and participant interview.

### **PARTICIPANT'S RESPONSIBILITIES**

As a participant in this research study you are required to provide all answers to the questionnaires in a truthful manner. For this project to be valid and complete, it is important that you comply with the requirements of the study (i.e., attending scheduled sessions). These requirements should be carefully considered prior to signing your consent.

## **PARTICIPANT'S RIGHTS**

By providing your consent to participate in this study, you do not waive any of your legal rights. This also does not relieve the investigators, or the institutions involved in the study from their legal or professional responsibilities.

## **IN THE EVENT OF AN INJURY OR ADVERSE EVENT DURING THE STUDY**

In the event of an injury or adverse event, which may or not be as a result of the study, you should contact the Research Study Staff below who will follow up with the study physicians. The research team and / or study physician will advise you as to how to access any medical / health care that you may require.

Research Manager Collaborative Care Seniors Health, Horizon Health Network:

Name: Telephone: nnn-xxx-xxxx

Email:

Project Research Assistant, University of New Brunswick:

Name: Telephone: nnn-xxx-xxxx

Email:

## **PARTICIPATION IN FUTURE RESEARCH STUDIES**

In addition to the SYNERGIC@Home research study, we have ongoing and upcoming research studies that you may be interested in. At the end of this form, you will be given the option to consent for us to contact you with information about participating in these future research studies.

## **QUESTIONS REGARDING PARTICIPATION**

If you have questions about the study, please feel free to contact Project Research Assistant:

by phone or e-mail: nnn-xxx-xxxx.

If you have questions about your rights as a research participant or the conduct of the study, you may contact the following individuals:

Regional Director of Ethics Services for Horizon Health Network

Telephone: nnn-xxx-xxxx Email:

If you have any questions or concerns about your privacy rights, you may contact the

Privacy Officer for Horizon Health Network

Telephone: nnn-xxx-xxxx (toll free number)

## **CONSENT TO PARTICIPATE IN A CLINICAL RESEARCH TRIAL**

**TITLE OF PROTOCOL:** SYNchronizing Exercises, Remedies in Gait and Cognition at Home:

1 Feasibility of a home-based double-blind randomized controlled trial to improve gait and cognition in  
2 individuals at risk for dementia

3 **PRINCIPAL INVESTIGATORS:**

4  
5 Dr. Chris A. McGibbon, PhD  
6 Faculty of Kinesiology and Institute of Biomedical Engineering  
7 University of New Brunswick, Fredericton, New Brunswick,  
8 Canada  
9

10  
11 Dr. Pamela Jarrett, MD FRCPC FACP  
12 Department of Geriatric Medicine, Horizon Health Network,  
13 Dalhousie Medicine New Brunswick, Saint John, New Brunswick Canada  
14

15  
16 Dr. Grant Handrigan, PhD  
17 School of Kinesiology and Recreation, Faculty of Health Sciences and Community Services,  
18 Université de Moncton, Moncton, New Brunswick, Canada  
19

20  
21 Dr. Ludivine Chamard - Witkowski, MD  
22 Department of Neuroscience, Dr. Georges-L.-Dumont University Hospital Centre,  
23 Moncton, New Brunswick, Canada  
24

25  
26 Dr. Manuel Montero-Odasso, MD, PhD, FRCPC  
27 Schulich School of Medicine & Dentistry, London, Ontario, Canada; Departments of Medicine  
28 (Geriatrics) and of Epidemiology and Biostatistics, University of Western Ontario,  
29 London, Ontario, Canada  
30

31 **RESEARCH STUDY PHYSICIANS**

32  
33 Dr. Wayne Sheehan, MD CCFP (COE) FCFP  
34 Horizon Health Network, Saint John,  
35

36  
37 Dr. Patrick Feltmate, MD FRCPP  
38 Department of Medicine, Horizon Health Network, Fredericton, New Brunswixk  
39 Division of Medicine, Dalhousie University  
40

41  
42 Dr. Alison Rodger, MD FRCPC  
43 Department of Geriatric Medicine, Horizon Health Network  
44  
45  
46  
47  
48  
49  
50  
51  
52  
53  
54  
55  
56  
57  
58  
59  
60

- 1 Has this study been explained to you?  Yes  No
- 2
- 3 Have you had an opportunity to ask questions and discuss this study?  Yes  No
- 4
- 5 Are you comfortable with the information that has been provided?  Yes  No
- 6
- 7 Do you understand that you are free to withdraw from this study?  Yes  No
- 8
- 9 Do you understand that you will receive a copy of this consent?  Yes  No
- 10
- 11 Do you understand that your Primary Healthcare Provider will be  Yes  No
- 12 informed that you are participating in this study?
- 13
- 14
- 15

16

17

18 By placing your initial on the appropriate line, you are agreeing to each of the following

19 statements:

20

21 You agree to be VIDEO AND AUDIO-RECORDED with Zoom for Healthcare for the purpose of study

22 assessment and intervention processes:

23

24  Yes  No \_\_\_\_\_ Participant Initials

25

26

27

28 You agree to provide a saliva sample.

29

30  Yes  No \_\_\_\_\_ Participant Initials

31

32

33

34 If you provide a saliva sample, you are interested in being contacted by a research coordinator to

35 have a portion of your saliva sample bio banked by Dr. Kathy Siminovitch in her laboratory for future

36 research. You will be asked to sign a separate consent for this procedure.

37

38  Yes  No \_\_\_\_\_ Participant Initials

39

40

41

42 You agree to be contacted for other studies related to this research study.

43

44  Yes  No \_\_\_\_\_ Participant Initials

45

46

47

48

49

50

51

52

53

54

55

56

57

58

59

60



**Appendix D:****CONSENT TO PARTICIPATE AS A STUDY CARE PARTNER IN A CLINICAL RESEARCH TRIAL****Study Title**

SYNchronizing Exercises, Remedies in Gait and Cognition at Home: Feasibility of a home-based double-blind randomized controlled trial to improve gait and cognition in individuals at risk for dementia

**Principal Investigators****Dr. Chris A. McGibbon, PhD**

Faculty of Kinesiology and Institute of Biomedical Engineering,  
University of New Brunswick, New Brunswick, Canada

**Dr. Pamela Jarrett, MD FRCPC FACP**

Department of Geriatric Medicine, Horizon Health Network,  
Dalhousie Medicine New Brunswick, Saint John, New Brunswick Canada

**Dr. Grant Handrigan, PhD**

School of Kinesiology and Recreation, Faculty of Health Sciences and Community Services,  
Université de Moncton, New Brunswick, Canada

**Dr. Ludivine Chamard - Witkowski, MD**

Department of Neuroscience, Dr. Georges-L.-Dumont University Hospital Centre,  
Moncton, New Brunswick, Canada

**Dr. Manuel Montero-Odasso, MD, PhD, FRCPC**

Schulich School of Medicine & Dentistry, London, Ontario, Canada; Departments of Medicine  
(Geriatrics) and of Epidemiology and Biostatistics, University of Western Ontario,  
London, Ontario, Canada

## INTRODUCTION

You are invited to participate in a research project as a *study care partner* for a participant in a research study that is assessing the feasibility of administering various interventions such as exercise and cognitive training (e.g. puzzles) at home through video conferencing. We hope that in addition to learning how feasible it is to do a research study entirely at home, we can help improve memory in older adults with our interventions.

This consent form contains information that will help you to decide whether you wish to participate in this study as a *study care partner*. The decision to take part in this study is voluntary. It is important that you understand why this study is being conducted and what it will involve. Please read this form carefully and ask any questions you may have. You may choose to discuss this study with your friends and family and research team members.

## BACKGROUND AND PURPOSE OF THE STUDY

There is currently an ongoing study (the SYNERGIC trial) taking place across Canada, in which various interventions are being tested with individuals who are at risk for dementia. This ongoing study has been funded by the Canadian Consortium on Neurodegeneration and Aging (CCNA) which is a pan-Canadian research initiative aimed to better understand cognitive decline in aging and dementia syndromes. The goal is to develop a clear understanding of how to best prevent the progression of memory problems leading to dementia in older adults. To date, the results are very promising.

The study you are being asked to participate as a *study care partner* in—SYNERGIC@Home—is an extension of the SYNERGIC trial that will allow you to participate in a home-based program that will use an online virtual platform called Zoom for Healthcare. This study is part of the New Brunswick Brain Health Initiative: Preventing Alzheimer's through Lifestyle Modification (NB-PALM), funded by the Healthy Seniors Pilot Projects, Public Health Agency of Canada and the Province of New Brunswick.

## POPULATION UNDER STUDY

We are interested in studying older adults living in the community in New Brunswick who are at risk for developing dementia. Individuals between 60 and 90 years of age who have two or more risk factors for dementia, **OR** Subjective Cognitive Impairment (SCI) **OR** Mild Cognitive Impairment (MCI) are eligible to be enrolled in this study. Currently, there are no medications approved that will reduce the risk of developing dementia for persons with risk factors, SCI or MCI. Evidence suggests that some types of physical exercise and cognitive training activities (e.g. games, puzzles) may slow memory decline. The SYNERGIC@Home study will examine specifically whether physical exercise coupled with cognitive training is effective in slowing the rate of memory decline in the study group.

## DESCRIPTION OF STUDY

This study, which will take place over a 10-month timeframe, is to learn about the role of certain types of exercises paired with cognitive training in delaying or preventing decline in memory. Initially, there will be assessments to evaluate the participant's current level of cognition, mobility and overall function. Following eligibility to participate, the participant will be randomly assigned (by chance) to one of four groups. This will be followed by 16 weeks of exercise and cognitive training sessions done in the participant's home three times a week. The time required to complete each intervention session will be approximately 90 minutes. This study will take place in the participant's home using



video conferencing called Zoom for Healthcare. All necessary equipment for participants for the study will be provided and delivery arranged by the research team.

Over the course of the study, the participant will be involved in several assessments and interventions aimed at improving cognitive functioning and physical activity as well as assessment sessions that will measure mobility and cognitive performance. Study care partners will not be involved in the cognitive training or the exercise components of the study.

At four times, over the course of the study, you will be asked to complete a part of a questionnaire called the Clinical Dementia Rating Scale. In this questionnaire, you will be asked questions related to the participant's memory. This questionnaire will take approximately 30 minutes to complete each time. Also, you may be asked to attend a conference with the study physician (explained later); this conference may be approximately 30 minutes. Your time commitment for the entire study will be up to 2 ½ - 3 hours.

Your participation, as a study partner, will last for as long as the participant is participating in the study which could be as long as 10 months.

You will be one of approximately 64 study partners asked to complete this questionnaire across approximately two study centers in New Brunswick.

## STUDY CARE PARTNER PARTICIPATION REQUIREMENTS

The study care partner:

- Is someone who either lives with the study participant or is a close relative and/or friend
- Has frequent contact with the study participant in order to provide and validate current information about the participant's memory and cognitive functioning as well as routine daily activities
- Has access to a home computer and/or a laptop / or telephone
- Have Internet access; a home computer and / or a tablet; access to and able to send and receive emails
- Able to speak, write and understand English or French.
- Able to complete the required assessments as a study partner with research staff.

The following is a list of sessions where your participation as a *study care partner* will take place:

- **Screening Session.** You will meet with one of our research staff to answer questions in the Clinical Dementia Rating Scale about the participant's memory.
- **Assessment Sessions.** Assessment sessions will take place during the study that will test the memory and activity levels of the study participant. As the *study care partner*, you will participate in the clinical assessment sessions during the time periods as follows:
  - one clinical assessment before the participant starts the interventions (called "baseline"),
  - one clinical assessment after the participant completes the interventions 4 months from baseline
  - one clinical assessment 6 months after the participant has completed the interventions.

Following the screening session, the study participant will be involved in a **Clinical Case Conference** with a study physician and members of the research team. At this session the study physician may determine that the participant will need a *study care partner* to be present. If you are required to be

present, this will be approximately 30 minutes of your time.

## COVID-19 PRECAUTIONS

Considering the COVID-19 pandemic of 2020, many closures have taken place, forcing some participation in research studies to take place remotely. Part of the motivation for implementing a home-based program is because we are committed to ensuring that participants are safe. All materials delivered to the participant's home will be thoroughly sanitized using disinfectant sprays and wipes. At all times we will continue to adhere to proper sanitization practices when transporting and delivering the study materials to the participant's home.

## POTENTIAL BENEFITS OF PARTICIPATION

The benefit to you in participating as a *study care partner* is an assurance that you will, to the best of your knowledge, validate the responses provided by the study participant. Beyond this, there are no direct benefits to you from participating in this study other than helping researchers advance knowledge in the area of memory and mobility in older adults.

## POTENTIAL RISKS OF PARTICIPATION

Participation in this study as a *study care partner* may involve some minimal risks or discomforts as explained below.

In your role as a *study care partner*, you will be asked the same questions about the participant's memory and cognitive functioning at different times. This repetition may be frustrating, produce some fatigue or boredom. If you feel any of these emotions while completing some questions, the research staff will suggest a break.

The study physician will not perform any examinations, tests, or procedures on you. Your only involvement in the study will be to answer questions and provide information

## VOLUNTARY PARTICIPATION AND WITHDRAWAL

Participation in this research is voluntary. You have the right to refuse to participate as a *study care partner*. You may withdraw from the study at any time. Your withdrawal will have no impact on your future health care. If you choose to withdraw your information that has been collected for purposes of this study, it will be removed. However, it should be noted that if this information has been used for scientific publications or presentations, it cannot be removed from those documents. It is important to know that you won't be individually identified in those publications or presentations. Once you have requested your information to be removed, it will no longer be included in future analysis or used for future publications and/or presentations.

## PRIVACY AND CONFIDENTIALITY

### Confidentiality

All research materials that would identify you will be held in strict confidence and, to the extent permitted by the applicable laws and/or regulations, will not be shared with others or made publicly available. If you agree to participate in this study, you will be assigned a unique identification number that will be used on all the documents related to this study. This unique number will be linked to your name and contact information on a "master list" of participants. This master list will be kept separately from the other research information in a locked and password secured format at the University of New

Brunswick. All information collected, except for the master list, will be kept for a period of 7 years. Paper documents will be kept under lock and key in the Research Coordinators' offices for the duration of the study. These paper documents will be shredded by confidential shredder at the end of the study. A digital copy of the study records will be maintained for future analyses. Computerized databases will be password protected. For the analysis, the principal investigators will only have access to your de-identified information and will not be able to identify you personally. The results of this study could lead to scientific or professional publications. In any of these cases, no personally identifiable information will be shared or published.

### **Video Conferencing Calls and Audio Recording**

If you use *Zoom for Healthcare*®, our research staff will take all necessary precautions to protect your privacy as a *study care partner* throughout the entire study. Video calls will not be conducted without your consent and will be completed by trained research staff in a private location (i.e., in a room by themselves with a closed door and signage to avoid entry by another person). Each video conference meeting room will only be shared with you and any other users will be barred from entering. All research staff will be connected to secure internet connections with adequate password protection.

During the assessments, we may record the session so we can check to ensure that we have recorded your answers correctly. The audio and video recordings will be stored at the University of New Brunswick on a secure SharePoint server and accessible only to approved research team members. They will not be accessed by anyone outside of the research team. Once we have verified your responses from each recording, we will delete the recordings. Because the recordings reveal identifiable information (including your face and voice), we will never share, upload, or distribute them to any outside parties in any format. For information pertaining to the security and privacy features within the *Zoom for Healthcare*® platform, please see <https://zoom.us/security>. All paper-based data will be stored in locked filing cabinets at UNB and / or research sites.

### **Data Storage**

Upon completion of the study, all data collected in paper form with the unique identification numbers will be uploaded to the Longitudinal Online Research and Imaging System (LORIS) system. This is a controlled access database located at McGill Centre for Integrative Neuroscience, situated on the campus of McGill University, Montreal, Quebec. LORIS meets international security and safety standards. There are numerous safeguards in place to keep your information confidential. In particular: your personal identifiers will be removed (i.e. name, date of birth, etc.); your data will be coded; and stringent security measures will prevent unauthorized access or misuse.

CCNA is committed to advancing future research throughout Canada by developing a data repository that is accessible to other researchers. Data from this research study, with all the identifying information removed, will be made available to researchers who are approved by a data oversight committee operated by CCNA.

### **COMPENSATION FOR PARTICIPATION**

There is no compensation for your role as a study care partner.

### **PARTICIPATION IN FUTURE RESEARCH STUDIES**

Besides the SYNERGIC@Home trial, we have ongoing and upcoming research studies that you may be interested in. At the end of this form, you will be given the option to consent for us to contact you with information about participating in these future research studies.

## PARTICIPANT'S RESPONSIBILITIES

As a participant in this research study you are required to provide all answers to the questionnaires in a truthful manner. For this project to be valid and complete, it is important that you comply with the requirements of the study (i.e., attending scheduled sessions). These requirements should be carefully considered prior to signing your consent.

## PARTICIPANT'S RIGHTS

By providing your consent to participate in this study, you do not waive any of your legal rights. This also does not relieve the investigators, or the institutions involved in the study from their legal or professional responsibilities.

## QUESTIONS REGARDING PARTICIPATION

If you have questions about the study, please feel free to contact Project Research Assistant:  
by phone or e-mail: nnn-xxx-xxxx

If you have questions about your rights as a study care partner or the conduct of the study, you may contact the following individuals:

Regional Director of Ethics Services for Horizon Health Network  
Telephone: nnn-xxx-xxx Email:

If you have any questions or concerns about your privacy rights, you may contact the  
Privacy Officer for Horizon Health Network  
Telephone: nnn-xxx-xxxx (toll free number)

**IN THE EVENT OF AN INJURY OR ADVERSE EVENT DURING THE STUDY**

In the event of an injury or adverse event, which may or may not be as a result of the study, you should contact the Study Staff listed below who will follow up with the study physicians. The research team and / or study physician will advise you as to how to access any medical / health care that you may require.

Research Manager Collaborative Care Seniors Health,  
Horizon Health Network

Name:  
Telephone: nnn-nnn-nnnn  
Email:

Project Research Assistant,  
University of New Brunswick:

Name:  
Telephone: nnn-nnn-nnnn  
Email:

For peer review only

**CONSENT TO PARTICIPATE AS A STUDY CARE PARTNER IN A CLINICAL RESEARCH TRIAL**

**TITLE OF PROTOCOL:** SYNchronizing Exercises, Remedies in Gait and Cognition at Home:  
Feasibility of a home-based double-blind randomized controlled trial to improve gait and cognition in  
individuals at risk for dementia

**PRINCIPAL INVESTIGATORS:**

Dr. Chris A. McGibbon, PhD  
Faculty of Kinesiology and Institute of Biomedical Engineering,  
University of New Brunswick, New Brunswick, Canada

Dr. Pamela Jarrett, MD FRCPC FACP  
Department of Geriatric Medicine, Horizon Health Network,  
Dalhousie Medicine New Brunswick, Saint John, New Brunswick Canada

Dr. Grant Handrigan, PhD  
School of Kinesiology and Recreation, Faculty of Health Sciences and Community Services,  
Université de Moncton, New Brunswick, Canada

Dr. Ludivine - Chamard Witkowski, MD  
Department of Neuroscience, Dr. Georges-L.-Dumont University Hospital Centre,  
Moncton, New Brunswick, Canada

Dr. Manuel Montero-Odasso, MD, PhD, FRCPC  
Schulich School of Medicine & Dentistry, London, Ontario, Canada; Departments of Medicine  
(Geriatrics) and of Epidemiology and Biostatistics, University of Western Ontario, London, Ontario,  
Canada

**RESEARCH STUDY PHYSICIANS**

Dr. Wayne Sheehan, MD CCFP (COE) FCFP  
Horizon Health Network, Saint John, New Brunswick

Dr. Patrick Feltmate, MD FRCPP  
Department of Medicine, Horizon Health Network, Fredericton, New Brunswick  
Division of Medicine, Dalhousie University

Dr. Alison Rodger, MD FRCPC  
Department of Geriatric Medicine, Horizon Health Network

|   |                                                                        |                              |                             |
|---|------------------------------------------------------------------------|------------------------------|-----------------------------|
| 1 | Has this study been explained to you?                                  | <input type="checkbox"/> Yes | <input type="checkbox"/> No |
| 2 |                                                                        |                              |                             |
| 3 | Have you had an opportunity to ask questions and discuss this study?   | <input type="checkbox"/> Yes | <input type="checkbox"/> No |
| 4 | Are you comfortable with the information that has been provided?       | <input type="checkbox"/> Yes | <input type="checkbox"/> No |
| 5 |                                                                        |                              |                             |
| 6 | Do you understand that you are free to withdraw from this study?       | <input type="checkbox"/> Yes | <input type="checkbox"/> No |
| 7 | Do you understand that you will receive a signed copy of this consent? | <input type="checkbox"/> Yes | <input type="checkbox"/> No |
| 8 | Do you understand that your Primary Healthcare Provider will be        | <input type="checkbox"/> Yes | <input type="checkbox"/> No |
| 9 | informed that you are participating in this study?                     |                              |                             |

**By placing your initial on the appropriate line, you are agreeing to each of the following statements:**

You agree to be VIDEO AND AUDIO-RECORDED with Zoom for Healthcare for the purpose of providing the information for the questionnaires.

Yes       No      \_\_\_\_\_ Participant Initials

You agree to be contacted for other studies related to this research study.

Yes       No      \_\_\_\_\_ Participant Initials

**PARTICIPANT’S STATEMENT**

By signing this consent, I am indicating that I have reviewed each page of this document. I hereby give my informed consent to be a participant as a Study Care Partner in this study.

\_\_\_\_\_/\_\_\_\_\_/\_\_\_\_\_  
*Signature of Study Partner*                      *Name (Printed)*                      *Day / Month / Year*  
*Participant*

\_\_\_\_\_/\_\_\_\_\_/\_\_\_\_\_  
*Signature of the Person*                      *Name (Printed)*                      *Day / Month / Year*  
*Conducting Consent Discussion*

**INVESTIGATOR’S/DELEGATE’S STATEMENT**

I have explained to the above participant the nature, requirements and the purpose of the study, potential benefits, and possible risks associated with participation in this study. I have answered any questions that have been raised. I believe that the participant understands the implications and the voluntary nature of the study.

\_\_\_\_\_  
 Investigator/Delegate (Print Name)                      Signature                      Date



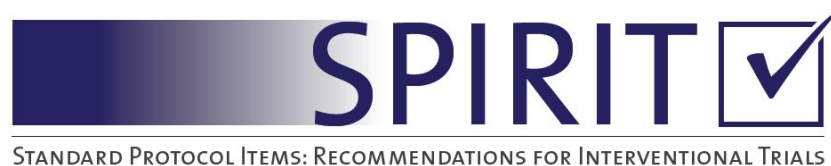

SPIRIT 2013 Checklist: Recommended items to address in a clinical trial protocol and related documents\*

| Section/item                      | Item No | Description                                                                                                                                                                                                                                                                              | Addressed on page number |
|-----------------------------------|---------|------------------------------------------------------------------------------------------------------------------------------------------------------------------------------------------------------------------------------------------------------------------------------------------|--------------------------|
| <b>Administrative information</b> |         |                                                                                                                                                                                                                                                                                          |                          |
| Title                             | 1       | Descriptive title identifying the study design, population, interventions, and, if applicable, trial acronym                                                                                                                                                                             | __ 1 __                  |
| Trial registration                | 2a      | Trial identifier and registry name. If not yet registered, name of intended registry                                                                                                                                                                                                     | __ 1 __                  |
|                                   | 2b      | All items from the World Health Organization Trial Registration Data Set                                                                                                                                                                                                                 | __ n/a __                |
| Protocol version                  | 3       | Date and version identifier                                                                                                                                                                                                                                                              | __ 1 __                  |
| Funding                           | 4       | Sources and types of financial, material, and other support                                                                                                                                                                                                                              | __ 16 __                 |
| Roles and responsibilities        | 5a      | Names, affiliations, and roles of protocol contributors                                                                                                                                                                                                                                  | __ 1,16 __               |
|                                   | 5b      | Name and contact information for the trial sponsor                                                                                                                                                                                                                                       | __ n/a __                |
|                                   | 5c      | Role of study sponsor and funders, if any, in study design; collection, management, analysis, and interpretation of data; writing of the report; and the decision to submit the report for publication, including whether they will have ultimate authority over any of these activities | __ n/a __                |
|                                   | 5d      | Composition, roles, and responsibilities of the coordinating centre, steering committee, endpoint adjudication committee, data management team, and other individuals or groups overseeing the trial, if applicable (see Item 21a for data monitoring committee)                         | __ n/a __                |

1 **Introduction**

2

3 Background and rationale 6a Description of research question and justification for undertaking the trial, including summary of relevant studies (published and unpublished) examining benefits and harms for each intervention \_\_\_\_\_4,5\_\_\_\_\_

4

5

6 6b Explanation for choice of comparators \_\_\_\_\_4\_\_\_\_\_

7

8 Objectives 7 Specific objectives or hypotheses \_\_\_\_\_5\_\_\_\_\_

9

10 Trial design 8 Description of trial design including type of trial (eg, parallel group, crossover, factorial, single group), allocation ratio, and framework (eg, superiority, equivalence, noninferiority, exploratory) \_\_\_\_\_5\_\_\_\_\_

11

12

13

14 **Methods: Participants, interventions, and outcomes**

15

16 Study setting 9 Description of study settings (eg, community clinic, academic hospital) and list of countries where data will be collected. Reference to where list of study sites can be obtained \_\_\_\_\_6\_\_\_\_\_

17

18

19 Eligibility criteria 10 Inclusion and exclusion criteria for participants. If applicable, eligibility criteria for study centres and individuals who will perform the interventions (eg, surgeons, psychotherapists) \_\_\_\_\_6\_\_\_\_\_

20

21

22 Interventions 11a Interventions for each group with sufficient detail to allow replication, including how and when they will be administered \_\_\_\_\_8,9\_\_\_\_\_

23

24

25 11b Criteria for discontinuing or modifying allocated interventions for a given trial participant (eg, drug dose change in response to harms, participant request, or improving/worsening disease) \_\_\_\_\_8\_\_\_\_\_

26

27

28 11c Strategies to improve adherence to intervention protocols, and any procedures for monitoring adherence (eg, drug tablet return, laboratory tests) \_\_\_\_\_9\_\_\_\_\_

29

30

31 11d Relevant concomitant care and interventions that are permitted or prohibited during the trial \_\_\_\_\_7\_\_\_\_\_

32

33

34 Outcomes 12 Primary, secondary, and other outcomes, including the specific measurement variable (eg, systolic blood pressure), analysis metric (eg, change from baseline, final value, time to event), method of aggregation (eg, median, proportion), and time point for each outcome. Explanation of the clinical relevance of chosen efficacy and harm outcomes is strongly recommended \_\_\_\_\_9,10\_\_\_\_\_

35

36

37

38

39

40 Participant timeline 13 Time schedule of enrolment, interventions (including any run-ins and washouts), assessments, and visits for participants. A schematic diagram is highly recommended (see Figure) \_\_\_\_\_Fig 1\_\_\_\_\_

41

42

43

44

45

46

1 Sample size 14 Estimated number of participants needed to achieve study objectives and how it was determined, including  
 2 clinical and statistical assumptions supporting any sample size calculations \_\_\_\_\_11\_\_\_\_\_

3  
 4 Recruitment 15 Strategies for achieving adequate participant enrolment to reach target sample size \_\_\_\_\_7\_\_\_\_\_

5  
 6 **Methods: Assignment of interventions (for controlled trials)**

7  
 8 Allocation:

9  
 10 Sequence 16a Method of generating the allocation sequence (eg, computer-generated random numbers), and list of any  
 11 generation factors for stratification. To reduce predictability of a random sequence, details of any planned restriction  
 12 (eg, blocking) should be provided in a separate document that is unavailable to those who enrol participants \_\_\_\_\_7\_\_\_\_\_

13  
 14 or assign interventions  
 15  
 16 Allocation 16b Mechanism of implementing the allocation sequence (eg, central telephone; sequentially numbered,  
 17 concealment opaque, sealed envelopes), describing any steps to conceal the sequence until interventions are assigned \_\_\_\_\_7\_\_\_\_\_

18 mechanism  
 19  
 20 Implementation 16c Who will generate the allocation sequence, who will enrol participants, and who will assign participants to  
 21 interventions \_\_\_\_\_7\_\_\_\_\_

22  
 23  
 24 Blinding (masking) 17a Who will be blinded after assignment to interventions (eg, trial participants, care providers, outcome  
 25 assessors, data analysts), and how \_\_\_\_\_7\_\_\_\_\_

26  
 27 17b If blinded, circumstances under which unblinding is permissible, and procedure for revealing a participant's  
 28 allocated intervention during the trial \_\_\_\_\_7\_\_\_\_\_

29  
 30  
 31 **Methods: Data collection, management, and analysis**

32  
 33 Data collection 18a Plans for assessment and collection of outcome, baseline, and other trial data, including any related  
 34 methods processes to promote data quality (eg, duplicate measurements, training of assessors) and a description of  
 35 study instruments (eg, questionnaires, laboratory tests) along with their reliability and validity, if known. \_\_\_\_\_13\_\_\_\_\_

36  
 37 Reference to where data collection forms can be found, if not in the protocol  
 38  
 39 18b Plans to promote participant retention and complete follow-up, including list of any outcome data to be  
 40 collected for participants who discontinue or deviate from intervention protocols \_\_\_\_\_7,8\_\_\_\_\_

41  
 42

|    |                                 |     |                                                                                                                                                                                                                                                                                                                                       |             |
|----|---------------------------------|-----|---------------------------------------------------------------------------------------------------------------------------------------------------------------------------------------------------------------------------------------------------------------------------------------------------------------------------------------|-------------|
| 1  | Data management                 | 19  | Plans for data entry, coding, security, and storage, including any related processes to promote data quality (eg, double data entry; range checks for data values). Reference to where details of data management procedures can be found, if not in the protocol                                                                     | ___13___    |
| 2  |                                 |     |                                                                                                                                                                                                                                                                                                                                       |             |
| 3  |                                 |     |                                                                                                                                                                                                                                                                                                                                       |             |
| 4  |                                 |     |                                                                                                                                                                                                                                                                                                                                       |             |
| 5  | Statistical methods             | 20a | Statistical methods for analysing primary and secondary outcomes. Reference to where other details of the statistical analysis plan can be found, if not in the protocol                                                                                                                                                              | ___11,12___ |
| 6  |                                 |     |                                                                                                                                                                                                                                                                                                                                       |             |
| 7  |                                 |     |                                                                                                                                                                                                                                                                                                                                       |             |
| 8  |                                 | 20b | Methods for any additional analyses (eg, subgroup and adjusted analyses)                                                                                                                                                                                                                                                              | ___11,12___ |
| 9  |                                 |     |                                                                                                                                                                                                                                                                                                                                       |             |
| 10 |                                 | 20c | Definition of analysis population relating to protocol non-adherence (eg, as randomised analysis), and any statistical methods to handle missing data (eg, multiple imputation)                                                                                                                                                       | ___n/a___   |
| 11 |                                 |     |                                                                                                                                                                                                                                                                                                                                       |             |
| 12 |                                 |     |                                                                                                                                                                                                                                                                                                                                       |             |
| 13 |                                 |     |                                                                                                                                                                                                                                                                                                                                       |             |
| 14 | <b>Methods: Monitoring</b>      |     |                                                                                                                                                                                                                                                                                                                                       |             |
| 15 |                                 |     |                                                                                                                                                                                                                                                                                                                                       |             |
| 16 | Data monitoring                 | 21a | Composition of data monitoring committee (DMC); summary of its role and reporting structure; statement of whether it is independent from the sponsor and competing interests; and reference to where further details about its charter can be found, if not in the protocol. Alternatively, an explanation of why a DMC is not needed | ___13___    |
| 17 |                                 |     |                                                                                                                                                                                                                                                                                                                                       |             |
| 18 |                                 |     |                                                                                                                                                                                                                                                                                                                                       |             |
| 19 |                                 |     |                                                                                                                                                                                                                                                                                                                                       |             |
| 20 |                                 |     |                                                                                                                                                                                                                                                                                                                                       |             |
| 21 |                                 |     |                                                                                                                                                                                                                                                                                                                                       |             |
| 22 |                                 | 21b | Description of any interim analyses and stopping guidelines, including who will have access to these interim results and make the final decision to terminate the trial                                                                                                                                                               | ___n/a___   |
| 23 |                                 |     |                                                                                                                                                                                                                                                                                                                                       |             |
| 24 |                                 |     |                                                                                                                                                                                                                                                                                                                                       |             |
| 25 | Harms                           | 22  | Plans for collecting, assessing, reporting, and managing solicited and spontaneously reported adverse events and other unintended effects of trial interventions or trial conduct                                                                                                                                                     | ___13___    |
| 26 |                                 |     |                                                                                                                                                                                                                                                                                                                                       |             |
| 27 |                                 |     |                                                                                                                                                                                                                                                                                                                                       |             |
| 28 | Auditing                        | 23  | Frequency and procedures for auditing trial conduct, if any, and whether the process will be independent from investigators and the sponsor                                                                                                                                                                                           | ___13___    |
| 29 |                                 |     |                                                                                                                                                                                                                                                                                                                                       |             |
| 30 |                                 |     |                                                                                                                                                                                                                                                                                                                                       |             |
| 31 |                                 |     |                                                                                                                                                                                                                                                                                                                                       |             |
| 32 | <b>Ethics and dissemination</b> |     |                                                                                                                                                                                                                                                                                                                                       |             |
| 33 |                                 |     |                                                                                                                                                                                                                                                                                                                                       |             |
| 34 | Research ethics approval        | 24  | Plans for seeking research ethics committee/institutional review board (REC/IRB) approval                                                                                                                                                                                                                                             | ___13___    |
| 35 |                                 |     |                                                                                                                                                                                                                                                                                                                                       |             |
| 36 |                                 |     |                                                                                                                                                                                                                                                                                                                                       |             |
| 37 | Protocol amendments             | 25  | Plans for communicating important protocol modifications (eg, changes to eligibility criteria, outcomes, analyses) to relevant parties (eg, investigators, REC/IRBs, trial participants, trial registries, journals, regulators)                                                                                                      | ___13___    |
| 38 |                                 |     |                                                                                                                                                                                                                                                                                                                                       |             |
| 39 |                                 |     |                                                                                                                                                                                                                                                                                                                                       |             |
| 40 |                                 |     |                                                                                                                                                                                                                                                                                                                                       |             |
| 41 |                                 |     |                                                                                                                                                                                                                                                                                                                                       |             |
| 42 |                                 |     |                                                                                                                                                                                                                                                                                                                                       |             |
| 43 |                                 |     |                                                                                                                                                                                                                                                                                                                                       |             |
| 44 |                                 |     |                                                                                                                                                                                                                                                                                                                                       |             |
| 45 |                                 |     |                                                                                                                                                                                                                                                                                                                                       |             |
| 46 |                                 |     |                                                                                                                                                                                                                                                                                                                                       |             |

|    |                               |     |                                                                                                                                                                                                                                                                                     |                    |
|----|-------------------------------|-----|-------------------------------------------------------------------------------------------------------------------------------------------------------------------------------------------------------------------------------------------------------------------------------------|--------------------|
| 1  | Consent or assent             | 26a | Who will obtain informed consent or assent from potential trial participants or authorised surrogates, and how (see Item 32)                                                                                                                                                        | ___6___            |
| 2  |                               |     |                                                                                                                                                                                                                                                                                     |                    |
| 3  |                               |     |                                                                                                                                                                                                                                                                                     |                    |
| 4  |                               | 26b | Additional consent provisions for collection and use of participant data and biological specimens in ancillary studies, if applicable                                                                                                                                               | ___7___            |
| 5  |                               |     |                                                                                                                                                                                                                                                                                     |                    |
| 6  |                               |     |                                                                                                                                                                                                                                                                                     |                    |
| 7  | Confidentiality               | 27  | How personal information about potential and enrolled participants will be collected, shared, and maintained in order to protect confidentiality before, during, and after the trial                                                                                                | ___13___           |
| 8  |                               |     |                                                                                                                                                                                                                                                                                     |                    |
| 9  |                               |     |                                                                                                                                                                                                                                                                                     |                    |
| 10 | Declaration of interests      | 28  | Financial and other competing interests for principal investigators for the overall trial and each study site                                                                                                                                                                       | ___15___           |
| 11 |                               |     |                                                                                                                                                                                                                                                                                     |                    |
| 12 |                               |     |                                                                                                                                                                                                                                                                                     |                    |
| 13 | Access to data                | 29  | Statement of who will have access to the final trial dataset, and disclosure of contractual agreements that limit such access for investigators                                                                                                                                     | ___13___           |
| 14 |                               |     |                                                                                                                                                                                                                                                                                     |                    |
| 15 |                               |     |                                                                                                                                                                                                                                                                                     |                    |
| 16 | Ancillary and post-trial care | 30  | Provisions, if any, for ancillary and post-trial care, and for compensation to those who suffer harm from trial participation                                                                                                                                                       | ___n/a___          |
| 17 |                               |     |                                                                                                                                                                                                                                                                                     |                    |
| 18 |                               |     |                                                                                                                                                                                                                                                                                     |                    |
| 19 |                               |     |                                                                                                                                                                                                                                                                                     |                    |
| 20 | Dissemination policy          | 31a | Plans for investigators and sponsor to communicate trial results to participants, healthcare professionals, the public, and other relevant groups (eg, via publication, reporting in results databases, or other data sharing arrangements), including any publication restrictions | ___n/a___          |
| 21 |                               |     |                                                                                                                                                                                                                                                                                     |                    |
| 22 |                               |     |                                                                                                                                                                                                                                                                                     |                    |
| 23 |                               |     |                                                                                                                                                                                                                                                                                     |                    |
| 24 |                               | 31b | Authorship eligibility guidelines and any intended use of professional writers                                                                                                                                                                                                      | ___n/a___          |
| 25 |                               |     |                                                                                                                                                                                                                                                                                     |                    |
| 26 |                               | 31c | Plans, if any, for granting public access to the full protocol, participant-level dataset, and statistical code                                                                                                                                                                     | ___n/a___          |
| 27 |                               |     |                                                                                                                                                                                                                                                                                     |                    |
| 28 |                               |     |                                                                                                                                                                                                                                                                                     |                    |
| 29 | <b>Appendices</b>             |     |                                                                                                                                                                                                                                                                                     |                    |
| 30 |                               |     |                                                                                                                                                                                                                                                                                     |                    |
| 31 | Informed consent materials    | 32  | Model consent form and other related documentation given to participants and authorised surrogates                                                                                                                                                                                  | __Appendix C & D__ |
| 32 |                               |     |                                                                                                                                                                                                                                                                                     |                    |
| 33 |                               |     |                                                                                                                                                                                                                                                                                     |                    |
| 34 | Biological specimens          | 33  | Plans for collection, laboratory evaluation, and storage of biological specimens for genetic or molecular analysis in the current trial and for future use in ancillary studies, if applicable                                                                                      | Appendix A, D & E  |
| 35 |                               |     |                                                                                                                                                                                                                                                                                     |                    |
| 36 |                               |     |                                                                                                                                                                                                                                                                                     |                    |

37 \*It is strongly recommended that this checklist be read in conjunction with the SPIRIT 2013 Explanation & Elaboration for important clarification on the items.  
 38 Amendments to the protocol should be tracked and dated. The SPIRIT checklist is copyrighted by the SPIRIT Group under the Creative Commons  
 39 "[Attribution-NonCommercial-NoDerivs 3.0 Unported](#)" license.  
 40  
 41  
 42

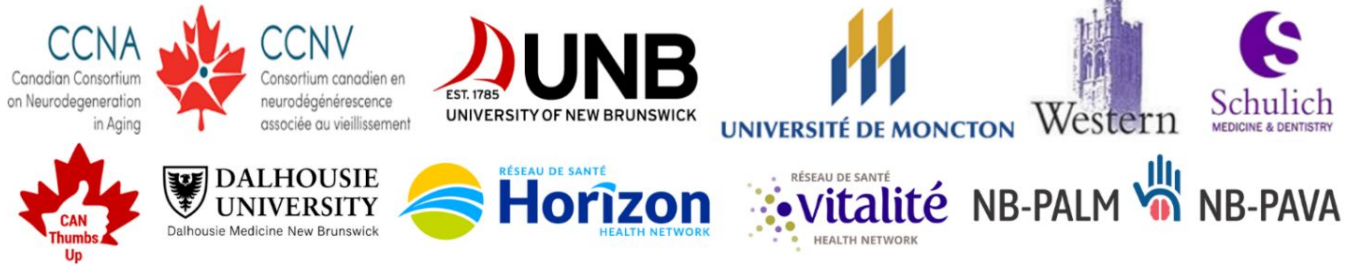

|                                                                                                                                                                                                |                                                                                                                                                                                                                                                                                                                                                                                                                                                                                                                                                                                                                                                                                                                                                                                                                                                                                                                                                                                                                                                                                                                                                                                                                                                                                                                                                                                                                                       |
|------------------------------------------------------------------------------------------------------------------------------------------------------------------------------------------------|---------------------------------------------------------------------------------------------------------------------------------------------------------------------------------------------------------------------------------------------------------------------------------------------------------------------------------------------------------------------------------------------------------------------------------------------------------------------------------------------------------------------------------------------------------------------------------------------------------------------------------------------------------------------------------------------------------------------------------------------------------------------------------------------------------------------------------------------------------------------------------------------------------------------------------------------------------------------------------------------------------------------------------------------------------------------------------------------------------------------------------------------------------------------------------------------------------------------------------------------------------------------------------------------------------------------------------------------------------------------------------------------------------------------------------------|
| <p><b>Protocol Title</b></p> <p><b>Running Title</b></p> <p><b>Principal Investigators</b></p> <p><b>Protocol Number</b></p> <p><b>NCT Number</b></p> <p><b>Version</b></p> <p><b>Date</b></p> | <p><b>SYNchronizing Exercises, Remedies in Gait and Cognition at Home: Feasibility of a home-based double-blind randomized controlled trial to improve gait and cognition in individuals at risk for dementia/ SYNchroniser l'exercice et des solutions pour la démarche et la santé cognitive chez soi</b></p> <p><b>SYNERGIC@Home/SYNERGIE~Chez soi</b></p> <p>Chris A. McGibbon, PhD<br/>Faculty of Kinesiology and Institute of Biomedical Engineering, University of New Brunswick, New Brunswick, Canada.</p> <p>Pamela Jarrett, MD, FRCPC, FACP<br/>Department of Geriatric Medicine, Horizon Health Network, Saint John New Brunswick, Canada; Dalhousie Medicine New Brunswick, Dalhousie University, Halifax, Nova Scotia, Canada.</p> <p>Grant Handrigan, PhD<br/>School of Kinesiology and Recreation, Faculty of Health Sciences and Community Services, Université de Moncton, Moncton, New Brunswick, Canada</p> <p>Ludivine Witkowski, MD<br/>Department of Neuroscience, Dr. Georges-L.-Dumont University Hospital Centre, Moncton, New Brunswick, Canada</p> <p>Manuel Montero-Odasso, MD, PhD, FRCPC<br/>Schulich School of Medicine &amp; Dentistry, London, Ontario, Canada; Departments of Medicine (Geriatrics) and of Epidemiology and Biostatistics, University of Western Ontario, London, Ontario, Canada</p> <p><b>SYNH001</b></p> <p><b>NCT04997681</b></p> <p><b>5.0</b></p> <p><b>Aug 30, 2021</b></p> |
|------------------------------------------------------------------------------------------------------------------------------------------------------------------------------------------------|---------------------------------------------------------------------------------------------------------------------------------------------------------------------------------------------------------------------------------------------------------------------------------------------------------------------------------------------------------------------------------------------------------------------------------------------------------------------------------------------------------------------------------------------------------------------------------------------------------------------------------------------------------------------------------------------------------------------------------------------------------------------------------------------------------------------------------------------------------------------------------------------------------------------------------------------------------------------------------------------------------------------------------------------------------------------------------------------------------------------------------------------------------------------------------------------------------------------------------------------------------------------------------------------------------------------------------------------------------------------------------------------------------------------------------------|

**Protocol Changes Table**

| <b>Affected Sections</b> | <b>Change(s)</b> | <b>Rationale</b> |
|--------------------------|------------------|------------------|
|                          |                  |                  |
|                          |                  |                  |
|                          |                  |                  |

For peer review only

# SYNERGIC@Home TRIAL

## SYNchronizing Exercises, Remedies in Gait and Cognition @Home

### Feasibility of a Home-Based Double-Blind Randomized Controlled Trial to Improve Gait and Cognition in Individuals at Risk for Dementia

#### Principal Investigators

Chris McGibbon PhD<sup>1,2</sup>, Pamela Jarrett MD FRCPC FACP<sup>3</sup>, Grant Handrigan PhD<sup>4</sup>,

Ludivine Witkowski MD FRCPC<sup>5</sup> and Manuel Montero-Odasso MD PhD FRCPC<sup>6,7</sup>.

#### Co-Principle Investigators

Carole C. Tranchant PhD<sup>8</sup>, Danielle Bouchard PhD CEP<sup>1</sup>, Linda Yetman RN PhD<sup>9</sup>, Bryn Robinson PhD<sup>9</sup>

Alison Rodger MD FRCPC<sup>3</sup>, Patrick Feltmate MD FRCPC<sup>17</sup>, Wayne Sheehan MD CCFP(COE) FCFP<sup>9</sup>, Lise Babin MD FRCPC<sup>16</sup>

#### Collaborators

Teresa Liu-Ambrose PT PhD<sup>10</sup>, Laura Middleton PhD<sup>11</sup>, Quincy J Almeida PhD<sup>12</sup>, Louis Bherer PhD<sup>13</sup>, Andrew Lim MD FRCPC<sup>14</sup>, and Mark Speechley PhD<sup>6</sup>.

#### Project Research Study Staff

NB-PALM Project Manager: Andrew Sexton PEng<sup>2</sup>

SYNERGIC Project Research Manager and Coordinator: Nellie Kamkar MSc<sup>18</sup>



1 Synergic@Home Research Coordinators: Alana Gullison MSc<sup>2</sup>, Kelly McMillan<sup>15</sup>, Chris  
2 Pauley<sup>9</sup>, Jacques Frigault<sup>16</sup>  
3  
4  
5  
6  
7  
8

9 **Affiliations:** <sup>1</sup>Faculty of Kinesiology, University of New Brunswick, Fredericton, New  
10 Brunswick, Canada; <sup>2</sup>Institute of Biomedical Engineering, University of New Brunswick,  
11 Fredericton, New Brunswick, Canada; <sup>3</sup>Department of Geriatric Medicine, Horizon Health  
12 Network, Saint John New Brunswick; Dalhousie Medicine New Brunswick, Dalhousie  
13 University, Halifax, Nova Scotia, Canada; <sup>4</sup>School of Kinesiology and Recreation, Faculty of  
14 Health Sciences and Community Services, Université de Moncton, Moncton, New Brunswick,  
15 Canada; <sup>5</sup>Department of Neuroscience, Dr. Georges-L-Dumont University Hospital Centre,  
16 Vitalité Health Network, Moncton, New Brunswick, Canada; <sup>6</sup>Schulich School of Medicine and  
17 Dentistry, London Ontario, Canada; <sup>7</sup>Departments of Medicine (Geriatrics) and of  
18 Epidemiology and Biostatistics, University of Western Ontario, London, Ontario, Canada;  
19 <sup>8</sup>School of Food Science, Nutrition and Family Studies, Faculty of Health Sciences and  
20 Community Services, Université de Moncton, Moncton, New Brunswick, Canada; <sup>9</sup>Horizon  
21 Health Network, Saint John, New Brunswick, Canada; <sup>10</sup>Department of Physical Therapy,  
22 University of British Columbia, Vancouver, British Columbia, Canada; <sup>11</sup>Department of  
23 Kinesiology, School of Public Health and Health Systems, Faculty of Applied Sciences,  
24 University of Waterloo, Waterloo, Ontario, Canada; <sup>12</sup>Department of Kinesiology and Physical  
25 Education, Faculty of Science, Wilfred Laurier University, Waterloo, Ontario, Canada;  
26 <sup>13</sup>Department of Psychology, Faculty of Arts and Science, Concordia University, Montréal,  
27 Québec, Canada; <sup>14</sup>Division of Neurology, Department of Medicine, Sunnybrook Health  
28 Sciences Centre, Toronto, Ontario, Canada; <sup>15</sup>Horizon Health Network, Fredericton, New  
29 Brunswick, Canada. <sup>16</sup>Vitalité Health Network, Moncton, New Brunswick, Canada;  
30 <sup>17</sup>Department of Geriatric Medicine, Horizon Health Network, Fredericton New Brunswick;  
31 Dalhousie Medicine New Brunswick, Dalhousie University, Halifax, Nova Scotia, Canada;  
32 <sup>18</sup>Gait and Brain Laboratory, Lawson Health Research Institute, Parkwood Hospital, London  
33 Ontario, Canada  
34  
35  
36  
37  
38  
39  
40  
41  
42  
43  
44  
45  
46  
47  
48  
49  
50  
51  
52  
53  
54  
55  
56  
57  
58  
59  
60

1 **Confidentiality Statement.** This document contains information that is privileged or  
2 confidential and may not be disclosed unless such disclosure is required by applicable laws  
3 and regulations. In any event, persons to whom the information is disclosed must be informed  
4 that the information is privileged or confidential and may not be further disclosed by them.  
5 These restrictions on disclosure will apply equally to all future information supplied to you,  
6 which is indicated as privileged or confidential.  
7  
8  
9  
10  
11  
12  
13  
14  
15  
16  
17  
18  
19  
20  
21  
22  
23  
24  
25  
26  
27  
28  
29  
30  
31  
32  
33  
34  
35  
36  
37  
38  
39  
40  
41  
42  
43  
44  
45  
46  
47  
48  
49  
50  
51  
52  
53  
54  
55  
56  
57  
58  
59  
60

For peer review only

## TABLE OF CONTENTS

|                                                               |           |
|---------------------------------------------------------------|-----------|
| <b>LIST OF FIGURES .....</b>                                  | <b>16</b> |
| <b>LIST OF TABLES.....</b>                                    | <b>16</b> |
| <b>SIGNATURE PAGE .....</b>                                   | <b>17</b> |
| <b>1. EXECUTIVE SUMMARY      18</b>                           |           |
| <b>2. ABSTRACT      28</b>                                    |           |
| <b>3. BACKGROUND 30</b>                                       |           |
| <b>3.1 RATIONALE OF THE INTERVENTIONS .....</b>               | <b>30</b> |
| 3.1.1 Physical Exercise.....                                  | 30        |
| 3.1.2 Cognitive Training.....                                 | 31        |
| 3.1.3 Combined Physical Exercise and Cognitive Training ..... | 31        |
| 3.1.4 Rationale for Polygenic Hazard Score Testing.....       | 32        |
| <b>3.2 SIGNIFICANCE OF THE SYNERGIC@HOME TRIAL .....</b>      | <b>33</b> |
| <b>4. RESEARCH QUESTIONS AND OBJECTIVES 34</b>                |           |
| <b>4.1 PRIMARY FEASIBILITY OBJECTIVES .....</b>               | <b>34</b> |
| 4.1.1 Intervention Adherence .....                            | 34        |
| <b>4.2 SECONDARY FEASIBILITY OBJECTIVES .....</b>             | <b>35</b> |
| 4.2.1 Recruitment Rate.....                                   | 35        |
| 4.2.2 Retention Rate.....                                     | 35        |
| 4.2.3 Trial Experience.....                                   | 35        |
| 4.2.4 Adverse Events.....                                     | 35        |
| 4.2.5 Data Loss.....                                          | 36        |
| <b>4.3. PRIMARY ANALYTIC OBJECTIVES .....</b>                 | <b>36</b> |
| <b>4.4. SECONDARY ANALYTIC OBJECTIVES.....</b>                | <b>36</b> |
| 4.4.1. Cognitive Improvement.....                             | 36        |
| 4.4.2. Mobility Improvement.....                              | 36        |
| <b>5. METHODS/DESIGN      37</b>                              |           |

|    |                                                                                                                   |           |
|----|-------------------------------------------------------------------------------------------------------------------|-----------|
| 1  | <b>5.1 STUDY DESIGN</b> .....                                                                                     | <b>37</b> |
| 2  |                                                                                                                   |           |
| 3  |                                                                                                                   |           |
| 4  | 5.1.1 Treatment Arms .....                                                                                        | 37        |
| 5  | 5.1.2 Study Sequence and Duration .....                                                                           | 38        |
| 6  | 5.1.3 Setting.....                                                                                                | 41        |
| 7  |                                                                                                                   |           |
| 8  | <b>5.2 STUDY POPULATION</b> .....                                                                                 | <b>42</b> |
| 9  |                                                                                                                   |           |
| 10 |                                                                                                                   |           |
| 11 | 5.2.1 Inclusion Criteria .....                                                                                    | 42        |
| 12 | 5.2.2 Exclusion Criteria.....                                                                                     | 45        |
| 13 | 5.2.3 Screen Failures.....                                                                                        | 46        |
| 14 | 5.2.4 Study Care Partner .....                                                                                    | 46        |
| 15 | 5.2.5 Strategies for Recruitment.....                                                                             | 47        |
| 16 | 5.2.6 Strategies for Retention.....                                                                               | 49        |
| 17 |                                                                                                                   |           |
| 18 | <b>5.3 ASSESSMENTS TOOLS</b> .....                                                                                | <b>50</b> |
| 19 |                                                                                                                   |           |
| 20 |                                                                                                                   |           |
| 21 | <b>6. OUTCOMES</b> <b>54</b>                                                                                      |           |
| 22 |                                                                                                                   |           |
| 23 |                                                                                                                   |           |
| 24 | <b>6.1 PRIMARY FEASIBILITY OUTCOMES</b> .....                                                                     | <b>54</b> |
| 25 |                                                                                                                   |           |
| 26 | 6.1.1 Intervention Adherence .....                                                                                | 54        |
| 27 |                                                                                                                   |           |
| 28 | <b>6.2 SECONDARY FEASIBILITY OUTCOMES</b> .....                                                                   | <b>54</b> |
| 29 |                                                                                                                   |           |
| 30 |                                                                                                                   |           |
| 31 | 6.2.1 Recruitment Enrollment Rate.....                                                                            | 54        |
| 32 | Defined as the total percent of enrolled participants relative to number of people screened for eligibility. .... | 54        |
| 33 | 6.2.2 Enrollment Retention Rate.....                                                                              | 54        |
| 34 | 6.2.3 Trial Experience.....                                                                                       | 55        |
| 35 | 6.2.4 Adverse Events.....                                                                                         | 55        |
| 36 | 6.2.5 Data Loss.....                                                                                              | 55        |
| 37 |                                                                                                                   |           |
| 38 | <b>6.3 PRIMARY ANALYTIC OUTCOMES</b> .....                                                                        | <b>56</b> |
| 39 |                                                                                                                   |           |
| 40 |                                                                                                                   |           |
| 41 | 6.3.1 Intervention Preference .....                                                                               | 56        |
| 42 |                                                                                                                   |           |
| 43 | <b>6.4 SECONDARY ANALYTIC OUTCOMES</b> .....                                                                      | <b>57</b> |
| 44 |                                                                                                                   |           |
| 45 | 6.4.1 Demographic Information and Medical History.....                                                            | 57        |
| 46 | 6.4.2 Cognitive Testing.....                                                                                      | 57        |
| 47 | 6.4.3 Sleep Patterns .....                                                                                        | 62        |
| 48 | 6.4.4 Diet Patterns .....                                                                                         | 62        |
| 49 | 6.4.5 Functional Independence and Activity Level .....                                                            | 62        |
| 50 | 6.4.6 Psychiatric Health and Well-Being.....                                                                      | 63        |
| 51 | 6.4.7 Health Literacy.....                                                                                        | 64        |
| 52 | 6.4.8 Technology Ability and Use .....                                                                            | 64        |
| 53 | 6.4.9 Gait and Mobility Assessments.....                                                                          | 64        |
| 54 | 6.4.10 Biological Marke .....                                                                                     | 67        |
| 55 |                                                                                                                   |           |
| 56 |                                                                                                                   |           |
| 57 |                                                                                                                   |           |
| 58 |                                                                                                                   |           |
| 59 |                                                                                                                   |           |
| 60 |                                                                                                                   |           |

|    |                                                                                    |           |
|----|------------------------------------------------------------------------------------|-----------|
| 1  | <b>7. STUDY INTERVENTIONS</b>                                                      | <b>68</b> |
| 2  |                                                                                    |           |
| 3  |                                                                                    |           |
| 4  | <b>7.1 INTERVENTION DESCRIPTION</b>                                                | <b>68</b> |
| 5  |                                                                                    |           |
| 6  |                                                                                    |           |
| 7  | <b>7.2 INTERVENTIONS</b>                                                           | <b>69</b> |
| 8  |                                                                                    |           |
| 9  |                                                                                    |           |
| 10 | 7.2.1 Active Exercise Intervention: Aerobic Exercise + Resistance Training (AE+RT) | 69        |
| 11 | 7.2.2 Control Exercise Intervention: Balance and Toning (BAT)                      | 74        |
| 12 | 7.2.3 Cognitive Training: NEUROPEAK™                                               | 77        |
| 13 | 7.2.4 Control Cognitive Training: Web Search and Video (WS+V)                      | 78        |
| 14 |                                                                                    |           |
| 15 | <b>7.3 RANDOMIZATION</b>                                                           | <b>78</b> |
| 16 |                                                                                    |           |
| 17 | 7.3.1 Method                                                                       | 79        |
| 18 | 7.3.2 Procedure                                                                    | 79        |
| 19 |                                                                                    |           |
| 20 | <b>7.4 BLINDING</b>                                                                | <b>80</b> |
| 21 |                                                                                    |           |
| 22 |                                                                                    |           |
| 23 | 7.4.1 Maintaining Blinding                                                         | 80        |
| 24 | 7.4.2 Unblinding                                                                   | 80        |
| 25 | 7.4.3 Debriefing                                                                   | 80        |
| 26 |                                                                                    |           |
| 27 | <b>7.5 EARLY WITHDRAWAL</b>                                                        | <b>81</b> |
| 28 |                                                                                    |           |
| 29 |                                                                                    |           |
| 30 | <b>7.6 MIXED METHODS DESIGN: EXPERIENCE OF STUDY PARTICIPANTS</b>                  | <b>81</b> |
| 31 |                                                                                    |           |
| 32 | 7.6.1 Mixed Methods Design                                                         | 82        |
| 33 | 7.6.2 Data Collection Instruments                                                  | 82        |
| 34 | 7.6.3 Participant Exit Questionnaire                                               | 83        |
| 35 | 7.6.4 Participant Semi-Structured Interview                                        | 83        |
| 36 | 7.6.5 Triangulation                                                                | 84        |
| 37 |                                                                                    |           |
| 38 | <b>7.7 COMPENSATION</b>                                                            | <b>84</b> |
| 39 |                                                                                    |           |
| 40 |                                                                                    |           |
| 41 | <b>8. STATISTICAL CONSIDERATIONS</b>                                               | <b>85</b> |
| 42 |                                                                                    |           |
| 43 |                                                                                    |           |
| 44 | <b>8.1 SAMPLE SIZE AND POWER ANALYSIS</b>                                          | <b>85</b> |
| 45 |                                                                                    |           |
| 46 |                                                                                    |           |
| 47 | <b>8.2 PLANNED DATA ANALYSIS</b>                                                   | <b>85</b> |
| 48 |                                                                                    |           |
| 49 | 8.2.1 Primary Feasibility Outcomes                                                 | 85        |
| 50 | 8.2.2 Secondary Feasibility Outcomes                                               | 86        |
| 51 | 8.2.3 Primary Analytic Outcomes                                                    | 87        |
| 52 | 8.2.4 Secondary Analytic Outcomes                                                  | 89        |
| 53 |                                                                                    |           |
| 54 | <b>8.3 FREQUENCY OF THE DATA ANALYSES</b>                                          | <b>90</b> |
| 55 |                                                                                    |           |
| 56 |                                                                                    |           |
| 57 |                                                                                    |           |
| 58 |                                                                                    |           |
| 59 |                                                                                    |           |
| 60 |                                                                                    |           |

|    |                                                        |            |
|----|--------------------------------------------------------|------------|
| 1  |                                                        |            |
| 2  | <b>9. ADVERSE EVENTS</b>                               | <b>90</b>  |
| 3  |                                                        |            |
| 4  |                                                        |            |
| 5  | <b>9.1 DEFINITIONS</b>                                 | <b>90</b>  |
| 6  |                                                        |            |
| 7  | 9.1.1 Adverse Event (AE)                               | 90         |
| 8  | 9.1.2 Serious Adverse Event (SAE)                      | 90         |
| 9  |                                                        |            |
| 10 | <b>9.2 CLASSIFICATION</b>                              | <b>91</b>  |
| 11 |                                                        |            |
| 12 | 9.2.1 Severity                                         | 91         |
| 13 | 9.2.2 Attribution                                      | 92         |
| 14 |                                                        |            |
| 15 |                                                        |            |
| 16 | <b>9.3 PROCEDURES FOR AE AND SAE REPORTING</b>         | <b>92</b>  |
| 17 |                                                        |            |
| 18 | 9.3.1 Adverse Event (AE) Reporting                     | 92         |
| 19 | 9.3.2 Serious Adverse Event (SAE) Reporting            | 93         |
| 20 | 9.3.3 Period of Observation                            | 93         |
| 21 |                                                        |            |
| 22 |                                                        |            |
| 23 | <b>10. ETHICAL AND OPERATIONAL CONSIDERATIONS</b>      | <b>93</b>  |
| 24 |                                                        |            |
| 25 |                                                        |            |
| 26 | <b>10.1 ETHICAL CONSIDERATIONS</b>                     | <b>94</b>  |
| 27 |                                                        |            |
| 28 | 10.1.1 Informed Consent                                | 94         |
| 29 | 10.1.2 Confidentiality and Privacy                     | 94         |
| 30 | 10.1.3 Biospecimen Collection Privacy                  | 95         |
| 31 |                                                        |            |
| 32 |                                                        |            |
| 33 | <b>10.2 STUDY SAFETY AND MONITORING COMMITTEE</b>      | <b>95</b>  |
| 34 |                                                        |            |
| 35 | <b>10.3 RISK MANAGEMENT AND SAFETY MONITORING PLAN</b> | <b>96</b>  |
| 36 |                                                        |            |
| 37 | 10.3.1 Safety Monitoring                               | 96         |
| 38 | 10.3.2 Withdrawal for Safety Reasons                   | 96         |
| 39 | 10.3.3 Study-wide Stopping Rules                       | 97         |
| 40 |                                                        |            |
| 41 |                                                        |            |
| 42 | <b>10.4 INCIDENTAL FINDINGS</b>                        | <b>97</b>  |
| 43 |                                                        |            |
| 44 | <b>10.5 PROTOCOL DEVIATIONS</b>                        | <b>97</b>  |
| 45 |                                                        |            |
| 46 |                                                        |            |
| 47 | <b>10.6 DATA MANAGEMENT AND STORAGE</b>                | <b>98</b>  |
| 48 |                                                        |            |
| 49 | 10.6.1 Primary Source Data                             | 98         |
| 50 | 10.6.2 Secondary Source Data                           | 98         |
| 51 | 10.6.3 Video and Audio Recording                       | 99         |
| 52 |                                                        |            |
| 53 |                                                        |            |
| 54 | <b>10.7 FUTURE USE OF STORED SPECIMENS AND DATA</b>    | <b>99</b>  |
| 55 |                                                        |            |
| 56 | <b>10.8 PUBLICATION AND DATA SHARING POLICY</b>        | <b>100</b> |
| 57 |                                                        |            |
| 58 |                                                        |            |
| 59 |                                                        |            |
| 60 |                                                        |            |

|    |                                                                     |            |
|----|---------------------------------------------------------------------|------------|
| 1  | 10.8.1 Dissemination of Study Findings .....                        | 100        |
| 2  | 10.8.2 Authorship.....                                              | 101        |
| 3  | 10.8.3 Data Ownership.....                                          | 101        |
| 4  |                                                                     |            |
| 5  |                                                                     |            |
| 6  | <b>11. DISCUSSION      101</b>                                      |            |
| 7  |                                                                     |            |
| 8  |                                                                     |            |
| 9  | <b>11.1 SIGNIFICANCE OF ESTABLISHING FEASIBILITY .....</b>          | <b>102</b> |
| 10 |                                                                     |            |
| 11 | <b>11.2 SIGNIFICANCE OF EXAMINING INTERVENTION PREFERENCE .....</b> | <b>102</b> |
| 12 |                                                                     |            |
| 13 |                                                                     |            |
| 14 | <b>11.3 SIGNIFICANCE OF SECONDARY OUTCOMES .....</b>                | <b>103</b> |
| 15 |                                                                     |            |
| 16 |                                                                     |            |
| 17 | <b>11.4 BENEFITS OF INTERVENTIONS.....</b>                          | <b>103</b> |
| 18 |                                                                     |            |
| 19 | 11.4.1 Benefits of Exercise .....                                   | 103        |
| 20 | 11.4.2 Benefits of Cognitive Training.....                          | 103        |
| 21 |                                                                     |            |
| 22 | <b>11.5 STRENGTHS AND CONCLUDING REMARKS .....</b>                  | <b>104</b> |
| 23 |                                                                     |            |
| 24 |                                                                     |            |
| 25 | <b>12. RESEARCH TIMELINE 105</b>                                    |            |
| 26 |                                                                     |            |
| 27 | <b>13. LIST OF ABBREVIATIONS      106</b>                           |            |
| 28 |                                                                     |            |
| 29 | <b>14. DECLARATIONS      108</b>                                    |            |
| 30 |                                                                     |            |
| 31 | <b>15. APPENDICES      109</b>                                      |            |
| 32 |                                                                     |            |
| 33 |                                                                     |            |
| 34 | <b>APPENDIX A: INTERVENTION PREFERENCE QUESTIONNAIRE.....</b>       | <b>109</b> |
| 35 |                                                                     |            |
| 36 | <b>APPENDIX B: MATERIALS GIVEN TO PARTICIPANTS.....</b>             | <b>111</b> |
| 37 |                                                                     |            |
| 38 |                                                                     |            |
| 39 | <b>APPENDIX C: RECRUITMENT PLAN AND MATERIALS.....</b>              | <b>112</b> |
| 40 |                                                                     |            |
| 41 |                                                                     |            |
| 42 | <b>APPENDIX D: EXIT QUESTIONNAIRE.....</b>                          | <b>133</b> |
| 43 |                                                                     |            |
| 44 | <b>APPENDIX E: SEMI-STRUCTURED INTERVIEW GUIDE.....</b>             | <b>135</b> |
| 45 |                                                                     |            |
| 46 |                                                                     |            |
| 47 | <b>APPENDIX F: CASE REPORT FORMS.....</b>                           | <b>137</b> |
| 48 |                                                                     |            |
| 49 | <b>APPENDIX G BUDGET SUMMARY.....</b>                               | <b>138</b> |
| 50 |                                                                     |            |
| 51 |                                                                     |            |
| 52 | <b>APPENDIX H: NEUROPEAK DUAL TASK SOFTWARE - SAMPLES.....</b>      | <b>140</b> |
| 53 |                                                                     |            |
| 54 | <b>APPENDIX I: PROTOCOL DEVIATION FORMS .....</b>                   | <b>143</b> |
| 55 |                                                                     |            |
| 56 |                                                                     |            |

1  
2 **16. REFERENCES 146**  
3  
4  
5  
6

7 **LIST OF FIGURES**

9  
10 Figure 1. Design of the SYNERGIC@Home trial. ....31  
11  
12 Figure 2. Participant timeline through the trial. ....34  
13  
14 Figure 3. Attrition flowchart for SYNERGIC@Home trial.....48  
15  
16  
17  
18  
19  
20

21 **LIST OF TABLES**

22  
23 Table 1. Canadian Consortium on Neurodegeneration in Aging (CCNA) Criteria for Cognitively  
24 Intact with risk factors, and Subjective and Mild Cognitive Impairment from COMPASS-ND<sup>2</sup> ..37  
25  
26 Table 2. Assessments across Study Visits for SYNERGIC@Home Trial .....43  
27  
28 Table 3. General overview of active intervention exercise regimen structure. ....63  
29  
30 Table 4. Example progression of strength training guideline across intervention. ....64  
31  
32 Table 5. Tailored resistance training prescription by mobility and exercise ability. ....65  
33  
34 Table 6. General overview of control BAT regimen structure.....68  
35  
36 Table 7. Kirkpatrick’s Framework for Evaluation of Participant Experience .....75  
37  
38  
39  
40  
41  
42  
43  
44  
45  
46  
47  
48  
49  
50  
51  
52  
53  
54  
55  
56  
57  
58  
59  
60



**SIGNATURE PAGE**

---

SIGNATURE

---

DATE (DD/MM/YYYY)

**Dr. Chris A. McGibbon, PhD**

Faculty of Kinesiology and Institute of Biomedical Engineering, University of New Brunswick, Fredericton, New Brunswick, Canada.

---

SIGNATURE

---

DATE (DD/MM/YYYY)

**Dr. Pamela Jarrett, MD FRCPC FACP**

Department of Geriatric Medicine, Horizon Health Network, Saint John, New Brunswick, Canada. Dalhousie University, Halifax, Nova Scotia, Canada

---

SIGNATURE

---

DATE (DD/MM/YYYY)

**Dr. Grant Handrigan, PhD**

School of Kinesiology and Recreation, Faculty of Health Sciences and Community Services, Université de Moncton, Moncton, New Brunswick, Canada

---

SIGNATURE

---

DATE (DD/MM/YYYY)

**Dr. Ludivine Chamard-Witkowski, MD**

Department of Neuroscience, Dr. Georges-L.-Dumont University Hospital Centre, Moncton, New Brunswick, Canada

---

SIGNATURE

---

DATE (DD/MM/YYYY)

**Dr. Manuel Montero-Odasso, MD, PhD, FRCPC**

Gait and Brain Laboratory, Parkwood Institute, Lawson Health Research Institute, London, ON, Canada; Division of Geriatric Medicine, Department of Medicine, Schulich School of Medicine & Dentistry, London, ON, Canada; Department of Epidemiology and Biostatistics, University of Western Ontario, London, ON, Canada.

## 1. EXECUTIVE SUMMARY

|                        |                                                                                                                                                                                                                                                                                                                                                                                                                                                                                                                                                                                                                                                                                                                                                                                                                                                                                                                                                                                                                                                                                                               |
|------------------------|---------------------------------------------------------------------------------------------------------------------------------------------------------------------------------------------------------------------------------------------------------------------------------------------------------------------------------------------------------------------------------------------------------------------------------------------------------------------------------------------------------------------------------------------------------------------------------------------------------------------------------------------------------------------------------------------------------------------------------------------------------------------------------------------------------------------------------------------------------------------------------------------------------------------------------------------------------------------------------------------------------------------------------------------------------------------------------------------------------------|
| Title                  | <p>SYNchronizing Exercises, Remedies in Gait and Cognition @Home (SYNERGIC@Home/Synergie~chez soi): Feasibility of a Home-Based Double-Blind Randomized Controlled Trial to Improve Gait and Cognition in Individuals at Risk for Dementia</p>                                                                                                                                                                                                                                                                                                                                                                                                                                                                                                                                                                                                                                                                                                                                                                                                                                                                |
| Background & Rationale | <p>In Canada, it is estimated that there are currently over 500,000 older adults living with Alzheimer’s Disease and Related Dementias (ADRDs). Encouragingly, close to a third of ADRD cases could be prevented by addressing modifiable risk factors<sup>1</sup>. Physical exercise and cognitive training are emerging interventions that have the potential to enhance cognitive function and mobility in older adults with Mild Cognitive Impairment (MCI). The SYNERGIC trial (SYNchronizing Exercises, Remedies in Gait and Cognition), a large multi-site randomized control trial, showed promising preliminary data that combined aerobic exercise and progressive resistance training (AE+RT) with cognitive training (NEUROPEAK™) had a better effect on cognition than a balance and toning control (BAT) intervention and control cognitive training with web search and video (WS+V) activities. While these interventions were provided face to face in a research facility, little is known about the feasibility of providing these multi-domain interventions in older adults at home.</p> |
| Study Design           | <p>This feasibility study is a factorial design Randomized Control Trial (RCT) in which participants will be randomized (in blocks of 4) into one of four arms:</p> <p>Arm 1: <b>Combined exercise (AE+RT) + Cognitive training (Neuropeak)</b><br/>         Arm 2: <b>Combined exercise (AE+RT)</b> + Control cognitive training (WS+V)<br/>         Arm 3: Control exercise (BAT) + <b>Cognitive training (Neuropeak)</b><br/>         Arm 4: Control exercise (BAT) + Control cognitive training (WS+V)</p> <p>Note: The active interventions are in bold. Arm 4 has the active control interventions.</p>                                                                                                                                                                                                                                                                                                                                                                                                                                                                                                 |

|                                                                                                                                                                                                                                                                                                  |                           |                                                                                                                                                                                                                                                                                                                                                                                                                                                                                                                                                                                                                                                                                                                                                                                                                                                                                                                                                                                                                                                                                                                                                                                                                                                                                                                                                                                                                                                                                                                                                |
|--------------------------------------------------------------------------------------------------------------------------------------------------------------------------------------------------------------------------------------------------------------------------------------------------|---------------------------|------------------------------------------------------------------------------------------------------------------------------------------------------------------------------------------------------------------------------------------------------------------------------------------------------------------------------------------------------------------------------------------------------------------------------------------------------------------------------------------------------------------------------------------------------------------------------------------------------------------------------------------------------------------------------------------------------------------------------------------------------------------------------------------------------------------------------------------------------------------------------------------------------------------------------------------------------------------------------------------------------------------------------------------------------------------------------------------------------------------------------------------------------------------------------------------------------------------------------------------------------------------------------------------------------------------------------------------------------------------------------------------------------------------------------------------------------------------------------------------------------------------------------------------------|
| 1<br>2<br>3<br>4                                                                                                                                                                                                                                                                                 | Study<br>Duration         | Estimated duration of entire trial period is approximately 24 months.                                                                                                                                                                                                                                                                                                                                                                                                                                                                                                                                                                                                                                                                                                                                                                                                                                                                                                                                                                                                                                                                                                                                                                                                                                                                                                                                                                                                                                                                          |
| 5<br>6<br>7                                                                                                                                                                                                                                                                                      | Number of<br>Participants | N = 64 community-dwelling older adult participants.                                                                                                                                                                                                                                                                                                                                                                                                                                                                                                                                                                                                                                                                                                                                                                                                                                                                                                                                                                                                                                                                                                                                                                                                                                                                                                                                                                                                                                                                                            |
| 8<br>9<br>10<br>11<br>12<br>13<br>14<br>15<br>16<br>17<br>18<br>19<br>20<br>21<br>22<br>23<br>24<br>25<br>26<br>27<br>28<br>29<br>30<br>31<br>32<br>33<br>34<br>35<br>36<br>37<br>38<br>39<br>40<br>41<br>42<br>43<br>44<br>45<br>46<br>47<br>48<br>49<br>50<br>51<br>52<br>53<br>54<br>55<br>56 | Target<br>Population      | <p>All Participants:</p> <ul style="list-style-type: none"> <li>• Ages 60-90.</li> <li>• Has a Family Physician or a Nurse Practitioner.</li> <li>• Internet access (have regular access to email), technology ability (able to send and receive emails), and access to a home computer and/or laptop computer device.</li> <li>• Self-reported levels of proficiency in English and/or French for speaking and understanding spoken and written language.</li> <li>• Able to comply with scheduled home-based assessments, interventions, treatment plan, and other trial procedures.</li> <li>• Able to ambulate at least 10 meters independently with or without a walking aid.</li> <li>• Being at risk of developing dementia: <ul style="list-style-type: none"> <li>a) <b>Mild Cognitive Impairment (MCI)</b>. Diagnosis of Mild Cognitive Impairment, in accordance with the Comprehensive Assessment of Neurodegeneration and Dementia COMPASS-ND study<sup>2</sup> definition (see Table 1).</li> <li>b) <b>Subjective Cognitive Impairment (SCI)</b>. Diagnosis of Subjective Cognitive Impairment, in accordance with COMPASS-ND study<sup>2</sup> definition (see Table 1).</li> <li>c) <b>Cognitively Intact with Risk Factors</b>. Cognitively intact based on COMPASS-ND definition (in Table 1) AND have a history of <i>two or more risk factors</i> for dementia, defined as the following: <ul style="list-style-type: none"> <li>▪ Obesity</li> <li>▪ Hypertension</li> <li>▪ Diabetes</li> </ul> </li> </ul> </li> </ul> |

|                               |                                                                                                                                                                                                                                                                                                                                                                                                                                                                                                                                                                                                                                                                                                                                                                                                                                                                                                                                                                                                                                                                                                                                                                                                              |
|-------------------------------|--------------------------------------------------------------------------------------------------------------------------------------------------------------------------------------------------------------------------------------------------------------------------------------------------------------------------------------------------------------------------------------------------------------------------------------------------------------------------------------------------------------------------------------------------------------------------------------------------------------------------------------------------------------------------------------------------------------------------------------------------------------------------------------------------------------------------------------------------------------------------------------------------------------------------------------------------------------------------------------------------------------------------------------------------------------------------------------------------------------------------------------------------------------------------------------------------------------|
|                               | <ul style="list-style-type: none"> <li>▪ Physical Inactivity</li> <li>▪ Cardiovascular disease</li> <li>▪ First-Degree Family History of Dementia</li> <li>▪ Dyslipidemia</li> <li>▪ Poor sleep</li> <li>▪ Poor diet</li> </ul> <ul style="list-style-type: none"> <li>• Preserved activities of daily living, operationalized as a score &gt;14/23 on the Lawton-Brody Instrumental Activities of Daily Living (IADL)<sup>3</sup> scale and confirmed by clinician’s interviews.</li> <li>• Must be medically able to participate in the study’s exercise training program, as determined by the physician for clearance to participate in combined exercise training program.</li> </ul>                                                                                                                                                                                                                                                                                                                                                                                                                                                                                                                   |
| <p>Exclusion<br/>Criteria</p> | <ul style="list-style-type: none"> <li>• A diagnosis of dementia.</li> <li>• Participants living in Nursing Homes or Adult Residential Facilities (Special Care Homes) will be excluded.</li> <li>• Serious underlying disease, which, in the opinion of the study physician excludes engagement in interventions or may interfere with the participant’s ability to participate fully in the study.</li> <li>• Has had surgery within the last two months or has planned surgery in the coming 12 months that, deemed by the study physician, could interfere with the participant’s vision, hearing, mobility or any other ability to participate in the study.</li> <li>• Has a history of intracranial surgery.</li> <li>• Regular Benzodiazepine use by a participant that the study physician determines to be significant enough to interfere with the participants ability to participate in the assessments and interventions in the study will be excluded.</li> <li>• Presence of major depression, schizophrenia, severe anxiety or drug/alcohol abuse or other medical illness that would prohibit them from safely participating in the study or may cause harm to the participant.</li> </ul> |

|                                  |                                                                                                                                                                                                                                                                                                                                                                                                                                                                                                                                                                                                                                                                                                                                                                                                                                                                                                                                                                                                                                                        |
|----------------------------------|--------------------------------------------------------------------------------------------------------------------------------------------------------------------------------------------------------------------------------------------------------------------------------------------------------------------------------------------------------------------------------------------------------------------------------------------------------------------------------------------------------------------------------------------------------------------------------------------------------------------------------------------------------------------------------------------------------------------------------------------------------------------------------------------------------------------------------------------------------------------------------------------------------------------------------------------------------------------------------------------------------------------------------------------------------|
|                                  | <ul style="list-style-type: none"> <li>• Current Parkinsonism or any neurological disorder with residual motor deficits (e.g. stroke with motor deficit), active musculoskeletal disorders (e.g. severe osteoarthritis of lower limbs) or history of knee/hip replacement affecting gait performance during the baseline assessment.</li> <li>• Severe visual and/or auditory impairment, which, according to the vision and hearing assessment, precludes the participant from engaging in the trial.</li> <li>• Intention to enroll in other clinical trials during the same time period.</li> <li>• Active participation in an organized and planned exercise program involving aerobic exercise and/or resistance training regimen in previous 6 months.</li> </ul>                                                                                                                                                                                                                                                                                |
| <p>Study Goal and Objectives</p> | <p>Overall Goals:</p> <ul style="list-style-type: none"> <li>• To examine feasibility and provide preliminary data on delivering combined physical exercise and cognitive training at home in older adults at risk of ADRD.</li> <li>• To examine participant's preference for each intervention type and to correlate this with subsequent adherence across the trial.</li> <li>• To assess whether the combination of physical exercise with cognitive training is more effective than the individual interventions in improving cognition, frailty, mobility, sleep, diet, and mood.</li> </ul> <p>Objectives:</p> <p><b>Primary Feasibility Objectives.</b> Is it feasible to implement a 16-week home-based, multi-domain intervention program aimed at reducing the risk of ADRD in community-dwelling older adults and improving their global health?</p> <ul style="list-style-type: none"> <li>• <b>Adherence.</b> Adherence of study participants will be defined as attendance to a minimum of 75% of study assessment sessions.</li> </ul> |

1  
2  
3  
4  
5  
6  
7  
8  
9  
10  
11  
12  
13  
14  
15  
16  
17  
18  
19  
20  
21  
22  
23  
24  
25  
26  
27  
28  
29  
30  
31  
32  
33  
34  
35  
36  
37  
38  
39  
40  
41  
42  
43  
44  
45  
46  
47  
48  
49  
50  
51  
52  
53  
54  
55  
56  
57  
58  
59  
60

•

**Secondary Feasibility Objectives:** Will participants adhere to the study protocol? How satisfied will participants be with the study at the end of the trial? What (if any) adverse events will occur during the trial?

- **Recruitment.** A successful recruitment rate is defined as the ability to recruit (and consent) a minimum of 75% of the total recruitment goal of 64 participants across all sites during the enrollment period
- **Retention.** A successful retention rate is defined as a minimum of 75% of the total number of recruited participants continuing to trial completion (at the immediate post intervention follow up session).
- **Experience and Satisfaction.** Experience and satisfaction will be defined as the results expressed by study participants in responses given to semi-structured interview questions that are designed using Kirkland’s four-level model<sup>4</sup>. Used in numerous settings for program evaluation, this framework consists of four dimensions: reaction, learning, behavior, and results.
- **Adverse Events.** An adverse event is defined as any incident or adverse outcome that is unexpected, and related or possibly related to participation in the research study.
- **Data Loss.** Data loss due to technical failures, personnel errors, and participant non-compliance will be assessed. A minimum acceptable rate of missing data will set at <20%.

**Primary Analytic Objectives.** In order to determine if affinity for any one intervention is an important factor in participants’ adherence to the study interventions, we designed the Intervention Preference Questionnaire (IPQ, Appendix A) that will be used to answer the question: Is interest level for a given intervention type correlated with subsequent adherence to the intervention? We will also use the IPQ to examine preference attitudes: Which intervention type (physical exercise or cognitive training) do the

|                  |                                                                                                                                                                                                                                                                                                                                                                                                                                                                                                                                                                                                                                                                                                                                                                                                                                                                                                                 |
|------------------|-----------------------------------------------------------------------------------------------------------------------------------------------------------------------------------------------------------------------------------------------------------------------------------------------------------------------------------------------------------------------------------------------------------------------------------------------------------------------------------------------------------------------------------------------------------------------------------------------------------------------------------------------------------------------------------------------------------------------------------------------------------------------------------------------------------------------------------------------------------------------------------------------------------------|
|                  | <p>majority of participants prefer over the other? What proportion of participants have no particular preference for either intervention? Do participants adhere better if they receive the active treatments they prefer? Do their attitudes change after completing the active interventions versus the control interventions?</p> <p><b>Secondary Analytic Objectives.</b> What is the estimated effect size (ES) of the interventions on cognitive improvement? What is the standard deviation of the outcome variable?</p> <ul style="list-style-type: none"> <li>• <b>Cognitive Improvement.</b> The ES for cognitive improvement will be defined using Cohen's descriptors: 0.2 = small; 0.5 = moderate; 0.8 = large.</li> <li>• <b>Mobility Improvement.</b> Similarly, the ES for mobility improvement will be defined using Cohen's descriptors: 0.2 = small; 0.5 = moderate; 0.8 = large.</li> </ul> |
| Outcome Measures | <p>Primary Feasibility Outcomes</p> <ul style="list-style-type: none"> <li>• <b>Adherence to Interventions.</b> Defined as the mean percent of all Intervention sessions attended of the 48 planned sessions per participant.</li> </ul> <p>Primary Analytic Outcome</p> <ul style="list-style-type: none"> <li>• <b>Preference.</b> The primary analytic goal of SYNERGIC@Home is to assess the relationship between participants' adherence to the interventions and their affinity for each intervention going into the trial. All participants will be given the Intervention Preference Questionnaire (IPQ, Appendix A) prior to implementation of the intervention at baseline (T0) and after the 4mo intervention (T4).</li> </ul> <p>Secondary Feasibility Outcomes</p>                                                                                                                                 |

- **Recruitment Enrollment Rate:** Defined as the total percent of enrolled participants relative to number of people screened for eligibility.
- **Enrollment Retention Rate:** Defined as the total percent of enrolled participants who continue throughout the trial and participate in outcomes assessments.
- **Assessment Tolerability:** Defined as no voluntary dropouts occurring either during or between baseline assessment and prior to allocation to an intervention group.
- **Trial Experience:** Defined as participants' qualitative responses to semi-structured open-ended questions aimed at providing insights on their overall trial experience within the context of the Kirkland evaluation framework.
- **Adverse Events:** Frequency cross-tabulation of AE severity versus AE relation to trial.
- **Data Loss:** Defined as data lost due to technical failures, personnel errors or participant non-compliance.

#### Secondary Analytic Outcomes

- **Cognitive Functioning.** Cognitive outcomes will be measured using the Cognitive Functional Composite 2 (CFC-2), the telephone version of the Telephone Cognitive Screening (TCogS), the remote version of the Montreal Cognitive Assessment (MoCA), and select items from the Alzheimer's Disease Assessment Scale-Cognitive (ADAS-Cog Plus) as part of our additional cognitive outcomes.
  - **CFC-2.** The CFC consists of the following validated tests<sup>5,6</sup>. The first three tests originate from the ADAS-Cog 13, which has been used as a primary outcome measure in numerous trials with individuals at risk for ADRDs and has recently been shown to be valid for remote use<sup>7-9</sup>: ADAS-Cog Immediate Word Recall, ADAS-Cog Delayed Word Recall, ADAS-Cog



1  
2  
3  
4  
5  
6  
7  
8  
9  
10  
11  
12  
13  
14  
15  
16  
17  
18  
19  
20  
21  
22  
23  
24  
25  
26  
27  
28  
29  
30  
31  
32  
33  
34  
35  
36  
37  
38  
39  
40  
41  
42  
43  
44  
45  
46  
47  
48  
49  
50  
51  
52  
53  
54  
55  
56  
57  
58  
59  
60

Orientation, Clinical Dementia Rating scale Sum of Boxes cognitive portion (CDR-SB Cog), the Lawton-Brody Instrumental Activities of Daily Living (IADL) and the Functional Activities Questionnaire (FAQ).

- **Additional Cognitive Outcomes.** Additional cognitive outcomes include the Oral Trail Making Test (TMT) A & B<sup>10</sup>, the 15-item Boston Naming Test (BNT)<sup>11</sup>, Logical Memory I & II<sup>12</sup>, ADAS-Cog Word Recognition<sup>7-9</sup>, the Delis-Kaplan Executive Function System (DKEFS) phonemic fluency test, and The Delis-Kaplan Executive Function System (DKEFS) semantic fluency test<sup>13</sup>, the Digit Span Backward Test<sup>14</sup>, and oral version of the Digit Symbol Modalities Test<sup>15</sup>.
- **Clinical and Mobility Outcomes.** Medications, blood pressure, heart rate, exercise routines, gait speed, dual task gait parameters, Sit to Stand Test (STST) performance, fear of falling, and fall history using self-reports of falls on a fall calendar.
- **Sleep Patterns.** Sleep habits will be assessed using the 18-item Pittsburgh Sleep Quality Index (PSQI-18) and the Work and Sleep Diary (WSD)<sup>16</sup>
- **Diet Habits.** Diet habits will be assessed using the 14-item Mediterranean Diet Assessment (MDA-14) a short questionnaire for Vitamin D intake, and the Eating Pattern Self-Assessment.
- **Functional Independence and Activity Level.** Additional descriptors of functional health and independence will also be tested including: the activities of daily living--using the Lawton-Brody Instrumental Activities of Daily Living (IADL) scale, the Physical Activity Scale for the Elderly (PASE), the Life Space Questionnaire (LSQ), and the Clinical Frailty Scale (CFS).
- **Mental Health and Well-Being.** Mental health and well-being will be assessed using the Short Form quality of life questionnaire (SF-36), the Generalized Anxiety Disorder 7 (GAD 7), Geriatric Depression

|                           |                                                                                                                                                                                                                                                                                                                                                                                                                                                                                                                                                                                                                                                                                        |
|---------------------------|----------------------------------------------------------------------------------------------------------------------------------------------------------------------------------------------------------------------------------------------------------------------------------------------------------------------------------------------------------------------------------------------------------------------------------------------------------------------------------------------------------------------------------------------------------------------------------------------------------------------------------------------------------------------------------------|
|                           | <p>Scale (GDS-30), and the COVID-19 Questionnaires.</p> <ul style="list-style-type: none"> <li>• <b>Health Literacy.</b> Health literacy will be assessed using the Short Test of Functional Health Literacy in Adults (STOFHLA).</li> <li>• <b>Technology Use and Ability.</b> Participant’s level of technology use and ability will be assessed using the Functional Assessment of Currently Employed Technology Scale (FACETS).</li> </ul>                                                                                                                                                                                                                                         |
| <p>Data Analysis Plan</p> | <p>Primary Analyses</p> <p>1- Primary Feasibility Outcome: Adherence to the interventions will be analyzed using a one-sample t-test that will test the hypothesis that participants complete at least 36 of the 48 (75%) scheduled interventions sessions. This test will be used to determine if the adherence is similar to hypothesize, better than hypothesized or worse than hypothesized.</p> <p>2- Primary Analytic Outcome: We will examine the relationship between interest level in and adherence to the interventions using Pearson’s r. This analysis will tell us if adherence to the trial is related to participants’ affinity for any one or more interventions.</p> |
| <p>Significance</p>       | <p>In today’s technological age, it is becoming more possible than ever to conduct impactful research with participants virtually. A home-based intervention program for older adults at risk for ADRDs has the advantages of allowing participants the freedom, flexibility and comfort to participate from their home—and may potentially lead to enhanced recruitment, retention and reduce social isolation.</p>                                                                                                                                                                                                                                                                   |

## 2. ABSTRACT

**BACKGROUND:** Nearly half a million Canadians live with Alzheimer's Disease and Related Dementias (ADRDs), and approximately one third of those cases could have been prevented with early intervention. Early intervention is best applied in pre-dementia states such as in individuals with mild cognitive impairment (MCI)<sup>1,17,18</sup> and those at risk for developing dementia<sup>19-21</sup>. Physical exercise and cognitive training are emerging interventions that have the potential to enhance cognitive function and mobility in older adults with MCI. The SYNERGIC trial (SYNchronizing Exercises, Remedies in Galt and Cognition), a large multi-site randomized control trial, showed promising preliminary data that individuals in an active exercise intervention combining aerobic exercise with progressive resistance training (AE+RT) *and* in a cognitive training program (NEUROPEAK™) had better cognitive outcomes than a balance and toning control (BAT) intervention paired with a control cognitive intervention consisting of website searching and watching a simple video (WS+V)<sup>22,23</sup>. While these interventions were provided face to face in a research facility, little is known about the feasibility of delivering these multi-domain interventions at home in older adults at risk for developing ADRDs. Thus, the primary goals of the SYNERGIC@Home feasibility study are to assess the feasibility of the home-based approach and to evaluate the relationship between participant's intervention preferences and their subsequent adherence. Secondary objectives will include the effect of the interventions on cognition, frailty, mobility, sleep, and diet.

**METHODS:** The SYNERGIC@Home feasibility trial is a randomized control trial (RCT) that will follow a 2 x 2 factorial design, with a 16-week home-based intervention program of combined physical exercises with cognitive training. Sixty-four participants will be randomized in blocks of four to one of the following four arms: 1) combined exercise (AE+RT) + cognitive training (NEUROPEAK™); 2) combined exercise (AE+RT) + control cognitive training (WS+V); 3) Control exercise (BAT) + cognitive training (NEUROPEAK™); and 4) Control exercise (BAT) + control cognitive training (WS+V). SYNERGIC@Home will be implemented entirely virtually through video and phone conferencing. Baseline, immediate post-intervention follow-up, and 6-month post-intervention follow-up assessments will include measures of cognition, frailty, mobility, sleep, diet, and psychological health. For primary feasibility objectives, we will obtain measures of recruitment and retention rates. For primary analytic objectives, we will

1  
2 examine the distribution of preference ratings and determine if there is a relationship between  
3 preference for a given intervention and subsequent adherence. A series of secondary analytic  
4 outcomes examining the potential effect of the individual and combined interventions on  
5 cognitive, mobility, and general well-being will be measured at both baseline and follow-up. If  
6 we find a relatively equal split in sex our sample, we will conduct gender-based analyses as  
7 additional, exploratory research.  
8  
9  
10  
11  
12

13 **EXPECTED RESULTS AND DISCUSSION:** The SYNERGIC@Home trial will  
14 establish the feasibility of a combined multimodal intervention program delivered at home in  
15 older adults. Similarly, it will estimate the frequency and strength of participant preference for  
16 different interventions and delineate the relationship between intervention preference and  
17 subsequent adherence. It will also build capacity for and pilot the delivery of multi-domain  
18 interventions using an entirely home-based protocol with individuals at risk for ADRDs. The  
19 SYNERGIC@Home trial will inform future larger scale studies on the feasibility and success of  
20 implementing home-based interventions for individuals at risk for ADRDs. Insights gained from  
21 this feasibility trial will be instrumental in developing various other at home, remote, and virtual  
22 intervention programs for community-dwelling older adults.  
23  
24  
25  
26  
27  
28  
29  
30  
31  
32  
33  
34

35 **Keywords:** Exercise, cognitive training, intervention preference, cognition, gait, dementia,  
36 elderly, home-based intervention program.  
37  
38  
39  
40  
41  
42  
43  
44  
45  
46  
47  
48  
49  
50  
51  
52  
53  
54  
55  
56  
57  
58  
59  
60

### 3. BACKGROUND

In 2015, over 46 million people lived with Alzheimer's Disease and Related Dementias (ADRDs) worldwide, with 1 new case appearing every 4.1 seconds<sup>1</sup>. The cost associated with these cases is over a trillion Canadian dollars<sup>1,24,25</sup>. There is no cure for dementia<sup>26</sup>. Recently, there has been an important shift in interventional studies on ADRDs to targeting early stages or pre-dementia states, such as individuals with mild cognitive impairment (MCI)<sup>27,28</sup>. The SYNERGIC Trial (SYNchronizing Exercises, Remedies in Galt and Cognition) implemented a multi-domain intervention study design on individuals with MCI at various sites across Canada in Ontario, Québec, and British Columbia<sup>22</sup> in both English and in French. The success of the SYNERGIC trial has warranted pilot testing of a similar intervention design to be provided at home across other sites. This protocol is the new application of the SYNERGIC@Home (SYNERGIE~chez soi) feasibility trial—a home-based version of the protocol to be implemented by researchers in New Brunswick. SYNERGIC@Home (SYNERGIE~chez soi) will assess the feasibility of a protocol and intervention future home-based intervention programs. It has added assessments of preference to evaluate the relationship between preference for interventions and subsequent adherence, and it will ultimately inform on the logistics of delivering a remote, home-based intervention to individuals at risk for developing ADRDs.

#### 3.1 RATIONALE OF THE INTERVENTIONS

The preliminary success of the original SYNERGIC program, as well as similar interventions in the literature, have illustrated that non pharmacological interventions to enhance cognition for older adults at risk of developing ADRDs that include physical exercise and cognitive training are very promising<sup>21-23,29</sup>. The rationale for each type of intervention to improve cognition in older adults at risk for developing ADRDs is as follows.

##### 3.1.1 Physical Exercise

1  
2  
3 Aerobic exercise (AE) and progressive resistance training (RT) have been shown to  
4 improve cognitive outcomes, along with improved physical capacity and mobility in older  
5 adults.<sup>30-33</sup> Both, AE<sup>34</sup> and RT<sup>35</sup> trials have reported positive results in improving  
6 cognitive performance, with consistent findings also observed after AE interventions  
7 lasting more than 3 months.<sup>30,36</sup> RT has been studied less extensively than aerobic  
8 training in older adults, particularly in those at risk for developing ADRDs.  
9

### 14 15 **3.1.2 Cognitive Training**

16  
17 Cognitive training delivered using the NEUROPEAK™ protocol of the SYNERGIC trial  
18 (e.g., a computer based cognitive process training) may improve cognition, mobility, and  
19 postural control in older adults. The NEUROPEAK™ program will be used by  
20 participants via a program downloaded onto participant's home computers and/or  
21 iPad/Android tablet and will consist of a dual-task cognitive training regimen designed  
22 by our group that has demonstrated that this type of training can also improve balance  
23 in healthy older adults.<sup>37</sup> The rationale for implementing cognitive training in both the  
24 SYNERGIC trial and this SYNERGIC@Home trial stems from a plethora of recent  
25 research suggesting that improvements in brain plasticity occur after cognitive  
26 training.<sup>38-40</sup>  
27  
28  
29  
30  
31  
32  
33  
34  
35

### 36 37 **3.1.3 Combined Physical Exercise and Cognitive Training**

38  
39 In addition to the benefits of each intervention alone—there is growing evidence that  
40 combining them may lead to a synergic effect as shown in the preliminary analyses of  
41 the SYNERGIC trial.<sup>41-43</sup> A recent systematic review of the literature on randomized  
42 control trials with combined training found that combinations of both physical exercise  
43 and cognitive training show positive effects on cognition. Factors such as intervention  
44 intensity and frequency were found to be important in facilitating positive outcomes post  
45 intervention.<sup>44</sup> Mechanistically, improvements in cognitive functioning are likely the  
46 result of changes in neurological factors that improve the brain's functional and  
47 structural integrity.  
48  
49  
50  
51  
52  
53  
54

1  
2  
3  
4  
5  
6 Interventions that include both cognitive and physical exercises show marked benefits  
7 to the brain's structural integrity and can be instrumental in delaying  
8 neurodegeneration.<sup>45</sup> Combined physical exercise and cognitive training interventions  
9 have also been shown to confer improvements in gait parameters, such as walking  
10 speed in older adults.<sup>46</sup> A recent systematic review conceptualizing the literature on  
11 combined exercise and cognitive training interventions showed that combined  
12 interventions significantly improve gait speed, cognitive functioning, and balance in  
13 individuals with MCI<sup>47</sup>.

14  
15  
16  
17  
18  
19  
20  
21 Based on the literature supporting the efficacy of cognitive and exercise-based  
22 interventions with individuals at risk for ADRDs—we plan to implement similar  
23 interventions in older adults at risk for ADRDs. The critical difference between the  
24 SYNERGIC@Home study and other intervention programs discussed thus far is the  
25 home-based, virtual nature of SYNERGIC@Home. Thus, the primary goal for the  
26 SYNERGIC@Home feasibility study is to evaluate the feasibility of administering a  
27 combined exercise and cognitive training home-based program through remote  
28 interfaces for older adults at risk for developing ADRDs.

### 36 **3.1.4 Rationale for Polygenic Hazard Score Testing**

37  
38  
39 MCI is alarmingly prevalent in older populations with over half of individuals with MCI  
40 progressing to dementia within five years.<sup>48</sup> There is a growing body of recent evidence  
41 suggesting that a cluster of genetic risk factors are associated with the onset of  
42 dementia.<sup>49</sup> Specifically, in genome wide association studies (GWAS), a specific allelic  
43 expression in 31 single nucleotide polymorphisms (SNPs) appears to be effective in  
44 quantifying individual differences in age-specific risk for dementia; this allelic  
45 combination is termed an individual's Polygenic Hazard Score (PHS), or sometimes  
46 referred to as an individual's Polygenic Risk Score (PRS).<sup>50</sup> In light of the fact that  
47 participants in the SYNERGIC@Home study will predominantly consist of individuals at  
48  
49  
50  
51  
52  
53  
54

1  
2  
3 risk for dementia (such as individuals with MCI), one of the research goals of the study  
4 is to assess the distribution of PRS/PHS in the study sample. This data will be  
5 instrumental in delineating research questions pertaining to efficacy of the study  
6 interventions as a function of cognitive risk. Any analyses done with PRS/PHS data will  
7 be conducted only during the analysis stage of the research project and will only be  
8 done by research personnel within the study team. The PRS/PHS is currently in the  
9 research stages and is not part of routine clinical care at this time.

### 16 **3.2 SIGNIFICANCE OF THE SYNERGIC@HOME TRIAL**

18 In addition to the convenience of participating in research from the comfort of one's  
19 home, there are critical health considerations that uniquely justify the home-based  
20 nature of the SYNERGIC@Home feasibility study. In light of the COVID-19 pandemic of  
21 2020 and the associated risks of exposure for older populations, SYNERGIC@Home  
22 allows for safe administration of interventions for older individuals at risk for ADRDs. To  
23 ensure the safety of our participants, we are planning to administer all interventions  
24 (including exercise and cognitive training) using a home-based protocol. The primary  
25 platform that we will use is *Zoom for Healthcare*©. Members of the research team will  
26 conduct the video-conferences with participants using Zoom for Healthcare© which  
27 protects participants' confidentiality through a secured encryption method. Study  
28 participants will be assisted by research team members to set up the easy to use Zoom  
29 platform on their personal computers or laptop devices. This home-based approach will  
30 allow participants to connect with the research team remotely. This feat will not only  
31 address the feasibility goals of SYNERGIC@Home, but it will also give older individuals  
32 an opportunity to connect with others. This is particularly important at a time during  
33 which physical distancing measures may be contributing significantly to the isolation  
34 and loneliness in older populations at this time.

35  
36  
37  
38  
39  
40  
41  
42  
43  
44  
45  
46  
47  
48  
49 We plan to pioneer a flexible home-based program for at-risk individuals and  
50 demonstrate the feasibility of implementing this innovative trial with researchers in New  
51 Brunswick. SYNERGIC@Home will obtain valuable insights on the logistics of a home-



1  
2  
3 based intervention program in individuals at risk for developing dementia. The insights  
4 gained from this feasibility study can be applied to inform future larger scale projects  
5 with similar goals. SYNERGIC@Home will be among the first to pilot a home-based  
6 combined exercise and cognitive training program in a randomized control trial for older  
7 adults at risk for developing ADRDs.  
8  
9  
10  
11  
12  
13  
14  
15

## 16 **4. RESEARCH QUESTIONS AND OBJECTIVES**

17  
18  
19 All feasibility objectives are consistent with current recommendations on conducting  
20 feasibility trials.<sup>51</sup> The overarching question is: Is it feasible to implement a 16-week  
21 home-based, multi-domain intervention program to improve health and reduce the risk  
22 of ADRDs in community-dwelling older adults?  
23  
24  
25  
26

### 27 **4.1 PRIMARY FEASIBILITY OBJECTIVES**

28  
29 It is well known that the benefits of exercise, whether physical or cognitive, can only be  
30 realized if one engages in the practice. Our primary feasibility outcome is to answer the  
31 question: Will participants adhere to the study protocol? Is it feasible to implement a 16-  
32 week home-based, multi-domain intervention program to improve health and reduce the  
33 risk of ADRDs in community-dwelling older adults?  
34  
35  
36  
37  
38

#### 39 **4.1.1 Intervention Adherence**

40  
41 Minimum acceptable adherence of study participants will be defined as attendance to at  
42 least 75% of intervention sessions.  
43  
44  
45

### 46 **4.2 SECONDARY FEASIBILITY OBJECTIVES**

47  
48 Our secondary feasibility objectives are aimed at evaluating a variety of other feasibility  
49 outcomes to answer questions such as: How difficult is it to recruit seniors to a home-  
50 based intervention, and do they remain in the study for its duration? Will they tolerate  
51 the extensive battery of testing at baseline? How satisfied will participants be with the  
52  
53  
54  
55

1  
2  
3 interventions? What (if any) adverse events are related to the intervention(s)? What is  
4 the rate of data loss/missing data?  
5  
6  
7

#### 8 **4.2.1 Recruitment Rate**

9 A successful recruitment rate is defined as the ability to recruit and consent a minimum  
10 of 75% of the total recruitment goal of 64 participants during the enrollment period.  
11  
12

#### 13 **4.2.2 Retention Rate**

14 A successful retention rate is defined as a minimum of 75% of the total number of  
15 consented participants continuing to intervention completion (at the immediate post  
16 intervention follow up session).  
17  
18  
19

#### 20 **4.2.3 Assessment Tolerability**

21 Successful assessment tolerability is defined as no voluntary dropouts occurring either  
22 during or between baseline assessment (both clinical and activity assessment batteries)  
23 and prior to allocation to an intervention group.  
24  
25  
26  
27  
28  
29

#### 30 **4.2.4 Trial Experience**

31 Trial experience will be defined as a participant's overall experience and satisfaction  
32 with the presentation, organization, content, and participation in the SYNERGIC@Home  
33 feasibility study.  
34  
35  
36  
37

#### 38 **4.2.5 Adverse Events**

39 Frequency of Adverse Events (AEs) will be documented throughout the trial and  
40 analyzed by severity of the AE and suspected relationship to the trial to determine if  
41 AEs are greater than chance in the active treatment arms.  
42  
43  
44  
45

#### 46 **4.2.6 Data Loss**

47 Data loss due to technical failures, personnel errors, and participant non-compliance will  
48 be assessed. A minimum acceptable rate of missing data will set at <20%.  
49  
50  
51  
52  
53  
54

### 4.3. PRIMARY ANALYTIC OBJECTIVES

In order to determine if affinity for any one intervention is an important factor in participants' adherence to the study interventions, we designed the Intervention Preference Questionnaire (IPQ, Appendix A) that will be used to answer the question: Is interest level for a given intervention type correlated with subsequent adherence to the intervention?

We will also use the IPQ to examine preference attitudes: Which intervention type (physical exercise or cognitive training) do the majority of participants prefer over the other? What proportion of participants have no particular preference for either intervention? Do participants adhere better if they receive the active treatments they prefer? Do their attitudes change after completing the active interventions versus the control interventions?

### 4.4. SECONDARY ANALYTIC OBJECTIVES

What is the estimated effect size (ES)? What is the standard deviation of the outcome variable?

#### 4.4.1. Cognitive Improvement

The ES for cognitive improvement will be defined using Cohen's descriptors: 0.2 = small; 0.5 = moderate; 0.8 = large.

#### 4.4.2. Mobility Improvement.

Similarly, the ES for mobility improvement will be defined using Cohen's descriptors: 0.2 = small; 0.5 = moderate; 0.8 = large.

## 5. METHODS/DESIGN

### 5.1 STUDY DESIGN

#### 5.1.1 Treatment Arms

The SYNERGIC@Home feasibility trial is a home-based, randomized, phase II, four-arm factorial design (2x2), double-blind control study. The SYNERGIC@Home feasibility trial will be administered virtually through *Zoom for Healthcare*® (an online video conferencing platform). A total of 64 participants at risk for ADRDs, aged 60 to 90 years of age will be enrolled and randomized, block randomization by four, into one of four arms (**Figure 1**), with 16 participants in each arm. Details pertaining to intervention and control conditions for both physical exercise and cognitive training are described in section 8.

Arm 1: **Combined exercise (AE+RT) + Cognitive training (Neuropeak™).**

Arm 2: **Combined exercise (AE+RT) + Control cognitive training (WS+V).**

Arm 3: Control exercise (BAT) + **Cognitive training (Neuropeak™).**

Arm 4: Control exercise (BAT) + Control cognitive training (WS+V).

Note: Experimental conditions are in bold. Arm 4 includes only the control interventions.

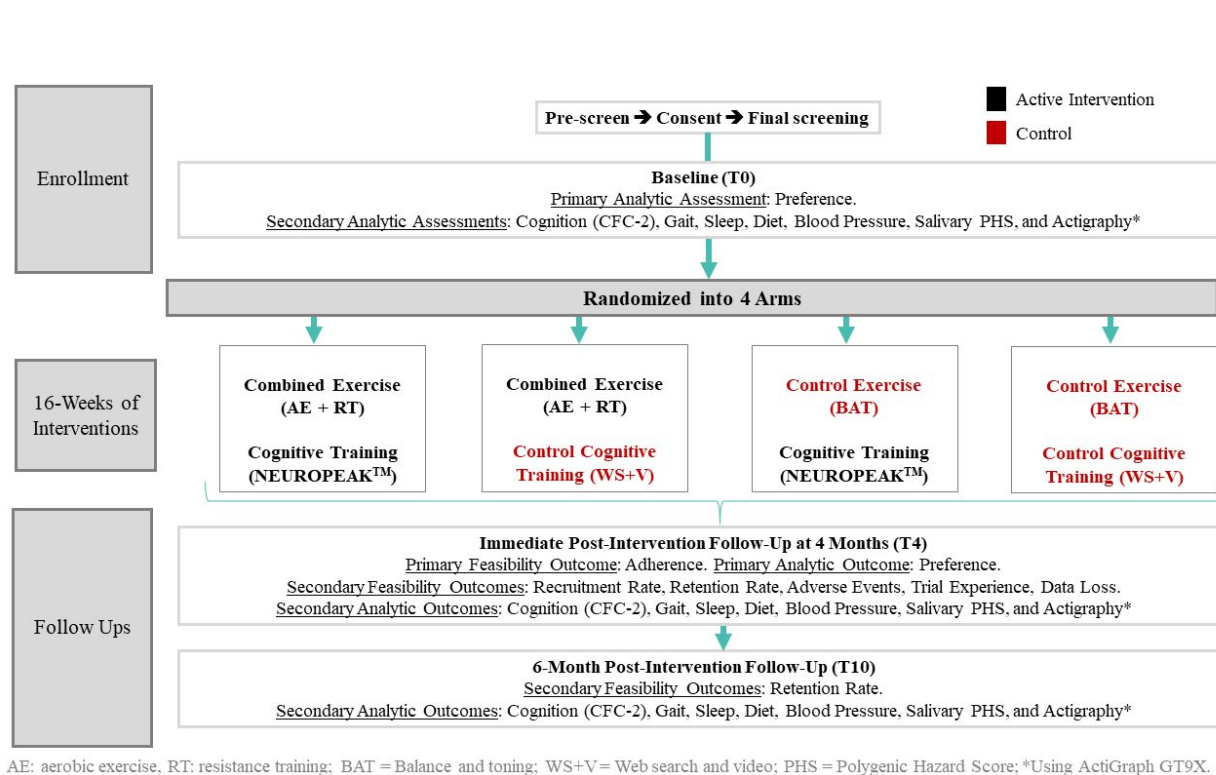

**Figure 1. Design of the SYNERGIC@Home trial.**

### 5.1.2 Study Sequence and Duration

Participants will mainly be informed through clinicians as well as recruitment pamphlets in the community or by advertisement on different medias (see 5.2.5 Strategies for Recruitment), potential participants who express an interest in learning more about the clinical trial will be contacted by the research coordinator for the study. A general overview of the study will be discussed and a Prescreening Questionnaire will be completed. This will be used to determine if the participant is eligible to be screened. This will also provide information about why potentially interested individuals are not able to be screened. This will provide useful information to inform future recruitment efforts in future studies testing these interventions.

During this prescreen, potential participants will be asked if they would prefer to participant in this study in either French or English. This study has the capacity to offer this in both official languages in New Brunswick. Those who wish to participate in

1  
2  
3 English will be directed to the research coordinator site in Horizon Health Network and  
4 those who would prefer to participate in French will be directed to the research  
5 coordinator the site in Vitalité Health Network.  
6  
7

8  
9 Following prescreening, informed consent will be obtained and assessments will be  
10 done during multiple visits: Screening, Baseline (T0), Immediate post intervention  
11 follow-up at 4 months (T4), and 6-month post-intervention follow-up (T10).  
12  
13  
14  
15

- 16 • **Screening Assessment** – This assessment will be completed over four separate  
17 time:
  - 18 ○ **Consent and clinical screening:** The potential participant meets virtually  
19 (via *Zoom for Healthcare*®) with the Clinical Research Coordinator/nurse  
20 and completes the consenting process. The study physician will be  
21 available to answer questions that require physician involvement during  
22 the informed consent process. Consent forms will be sent to participants  
23 via email if participant has access to a printer and scanner and via mail  
24 otherwise. Consenting participants will provide written consent and send  
25 back with regular mail their signed consent form. After the research  
26 coordinator received the consent, a copy will be sent back to the  
27 participant and the assessments will be done by the Clinical Research  
28 Coordinator. This is expected to take 2 hours.  
29  
30 ○ **Activity (mobility) screening:** The participant meets virtually (via *Zoom*  
31 *for Healthcare*®) with the Kinesiology Research Assist who will conduct a  
32 battery of mobility and lifestyle assessments (see section 6.4.7). This is  
33 expected to take 2 hours.  
34  
35 ○ **Clinical Case Conference and enrollment:** The participant will meet  
36 again virtually (via *Zoom for Healthcare*®) with the Clinical Research  
37 Coordinator/Nurse and the Study Physician who will review the results of  
38 all of the assessments and finalize the inclusion and exclusion criteria.  
39 This is expected to take 1 hour. If the participant is eligible, their baseline  
40 assessment visits are scheduled.  
41  
42  
43  
44  
45  
46  
47  
48  
49  
50  
51  
52  
53  
54

- 1
- 2
- 3 • Baseline Assessment (T0) – will be done within 2 weeks of successful
- 4 enrollment.
- 5
- 6
- 7 • Part of the baseline assessment will consist of actigraphy monitoring for sleep
- 8 and physical activity levels and two separate assessment visits:
- 9
  - 10 ○ **Actigraphy monitoring:** Participants will wear an ActiGraph monitor on
  - 11 their wrist at all times (except when bathing) for 10 consecutive days
  - 12 before their baseline assessment, to measure their sleep patterns and
  - 13 daily activity levels (see section 6.4.7). The instructions and materials
  - 14 needed for this monitoring will be mailed out to the participant and the
  - 15 research coordinator, who will meet with the participant to review the
  - 16 instructions.
  - 17 ○ **Clinical assessment:** The participants meets virtually (via *Zoom for*
  - 18 *Healthcare*©) with the Clinical Research Coordinator/Nurse who will
  - 19 conduct additional assessments (see Table 2). This is expected to take 2
  - 20 hours.
  - 21
  - 22
  - 23
  - 24
  - 25
  - 26
  - 27
  - 28
- 29 • Randomization occurs after the Baseline assessment by allocating the participant
- 30 to a treatment group from a pre-determined block-randomized sequence (see
- 31 section 8.3).
- 32
- 33
- 34 • Intervention Phase (T0-T4) – Will start within 2 weeks of completion of the
- 35 Baseline Assessment. The intervention will continue 3x per week for 16 weeks
- 36 (see Section 8), for a total of 48 virtual sessions.
- 37
- 38
- 39 • Immediate Post-Intervention Assessment (T4) –Within 2 weeks of completion of
- 40 the 16 week intervention, participants will wear the ActiGraph for 10 consecutive
- 41 days. They will also undergo clinical and activity assessment in two separate
- 42 visits, as described for baseline. (See Table 2) Each assessment visit is
- 43 expected to take 2 hours.
- 44
- 45
- 46
- 47
- 48 • Six month Post Intervention Assessment (T10) – Within 2 weeks of the 6 month
- 49 date after completion of the intervention the participants will wear the ActiGraph
- 50 again for 10 consecutive. They will also have the clinical and activity
- 51
- 52
- 53
- 54

assessments in two separate virtual visits repeated. See Table 2. Each assessment visit is expected to take 2 hours.

Figure 2 shows the sequence of activities and their expected durations.

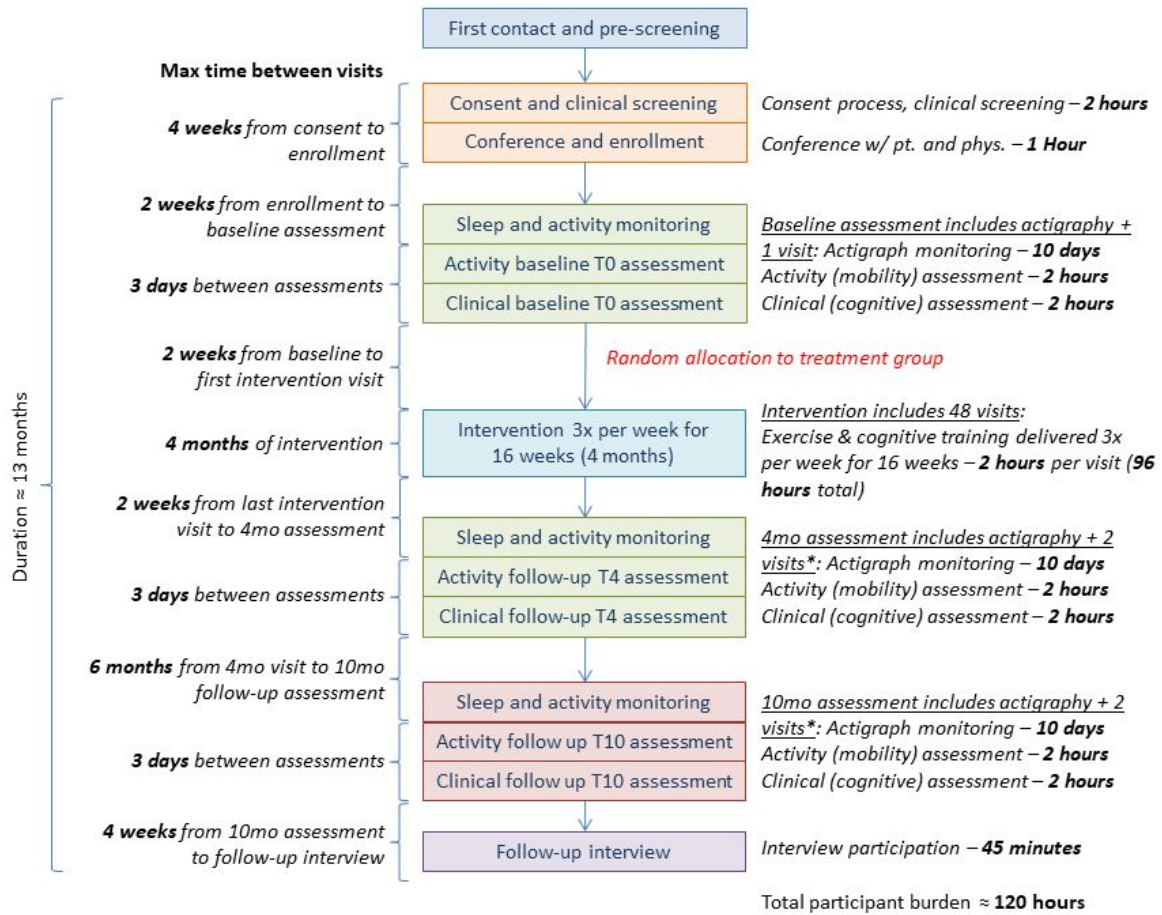

**Figure 2. Participant timeline through the trial.**

### 5.1.3 Setting

Participants will be recruited from across the entire province of New Brunswick, Canada. Participants must be residing and have a mailing address in New Brunswick. They will be living in their own homes in the community. Participants can be either Anglophone or Francophone. All study assessments and interventions will be done



1  
2  
3 virtually (via video conferencing through *Zoom for Healthcare*®), in the language of the  
4 participant's choice, by a research team member from the University of New Brunswick  
5 (Fredericton), Université de Moncton, Horizon Health Network, and/or Vitalité Health  
6 Network.  
7  
8  
9

## 10 11 **5.2 STUDY POPULATION**

12  
13 The target recruitment is N = 64 older adults aged 60 to 90 years old at risk of  
14 developing ADRDs who meet the following inclusion and exclusion criteria. Medical and  
15 clinical information will be collected by self-report by the participant. If clarification is  
16 needed regarding this clinical information, contact will be made with the participant's  
17 primary care physician/provider with the consent of the participant. Although we will  
18 make every effort to recruit equal numbers of Anglophone and Francophone  
19 participants, due to provincial distribution it may be expected that only 25-30% of  
20 recruits will be Francophone, therefore we will set a minimum recruitment of  
21 Francophone participants at 18 and maximum Anglophone recruitment at 46.  
22  
23  
24  
25  
26  
27  
28  
29

### 30 **5.2.1 Inclusion Criteria**

31 Participants must meet each of the following criteria for enrolment into the study:  
32  
33

- 34 • Age 60 to 90 years old.
- 35 • Has a Family Physician or a Nurse Practitioner.
- 36 • Has internet access (and have regular access to email), and the technology  
37 ability (able to send and receive emails).
- 38 • Resides in their own home/apartment in the community.
- 39 • Has access to a home computer and/or a laptop computer device.
- 40 • Self-reported levels of proficiency in English and/or French for speaking and  
41 understanding spoken and written language.
- 42 • Able to comply with scheduled home-based assessments, interventions, and  
43 other trial procedures.
- 44 • Able to ambulate at least 10 m independently with or without a walking aid.
- 45 • Being at risk of developing dementia:

- 1  
2  
3  
4  
5  
6  
7  
8  
9  
10  
11  
12  
13  
14  
15  
16  
17  
18  
19  
20  
21  
22  
23  
24  
25  
26  
27  
28  
29  
30  
31  
32  
33  
34  
35  
36  
37  
38  
39  
40  
41  
42  
43  
44  
45  
46  
47  
48  
49  
50  
51  
52  
53  
54  
55  
56  
57  
58  
59  
60
- a) **Mild Cognitive Impairment (MCI) Group.** Diagnosis of Mild Cognitive Impairment, in accordance with the criteria used in the Comprehensive Assessment of Neurodegeneration and Dementia (COMPASS-ND) study<sup>2</sup> (Table 1).
- b) **Subjective Cognitive Impairment (SCI) Group.** Diagnosis of Subjective Cognitive Impairment, in accordance with the COMPASS-ND study<sup>2</sup> definition (Table 1).
- c) **Cognitively Intact with Risk Factors Group.** Cognitively Intact based on COMPASS ND study<sup>2</sup> definition (Table 1)) **AND** have a history of **two or more risk factors** for dementia, defined as the following (Table 1):
- **Obesity:** Defined as a Body Mass Index (BMI) > 30 kg/m<sup>2</sup> (as derived from the National Institute of Health BMI calculator<sup>52</sup>)
  - **Hypertension:** Defined as a documented Systolic Blood Pressure > 140 mm Hg, OR a physician's diagnosis of hypertension, OR presence of physician prescribed medical treatment for hypertension, OR other approaches to treatment for hypertension (i.e., diet or exercise).
  - **Diabetes:** Defined as a physician's diagnosis of diabetes, OR presence of physician prescribed medical treatment for diabetes, OR other approaches to treatment for diabetes (i.e., diet or exercise).
  - **Cardiovascular disease:** Defined as a physician's diagnosis of angina, myocardial infarction, coronary revascularization or other arterial revascularization, stroke, transient ischemic attack and/or peripheral vascular disease.
  - **Physical inactivity:** Defined as inactive, whereby active is defined as engaging in a minimum of 20-30 minutes of physical activity causing sweating and breathlessness, at least two times per week.

- **First-degree family history of dementia:** Defined as a physician's diagnosis of dementia in a first-degree relative, including a parent, sibling, or child.
  - **Dyslipidemia:** Defined as a documented total cholesterol > 6.5 mmol/L, OR a physician's diagnosis of hypercholesterolemia, OR presence of physician prescribed medical treatment for hypercholesterolemia, OR other approaches to treatment (e.g. diet, exercise).
  - **Poor sleep:** Defined as a score of 6 or higher on the PSQI-18 (higher scores indicate poorer sleep).
  - **Poor diet:** Defined as a score of 7 or less on the MDA-14.
- Must be medically able to participate in the study's exercise training program, as by the study physician for clearance to participate in combined exercise training program.
  - Preserved activities of daily living, operationalized as a score of > 14/23 on the Lawton-Brody Instrumental Activities of Daily Living (IADL) scale<sup>3</sup> and confirmed by clinician's interviews.

**Table 1.** Canadian Consortium on Neurodegeneration in Aging (CCNA) Criteria for Cognitively Intact with risk factors, and Subjective and Mild Cognitive Impairment from COMPASS-ND<sup>2</sup>

| Group                                            | Core Diagnostic Criteria                                                                                    | Operationalized as                                                                                                                                                                                                                                                                                                                                                               |
|--------------------------------------------------|-------------------------------------------------------------------------------------------------------------|----------------------------------------------------------------------------------------------------------------------------------------------------------------------------------------------------------------------------------------------------------------------------------------------------------------------------------------------------------------------------------|
| <b>Cognitively Intact (CI) with risk factors</b> | Absence of SCI and/or MCI based on below definitions, with two or more known risk factors for dementia.     | Not having SCI or MCI, and having at least two (2) of the following risk factors: <ul style="list-style-type: none"> <li>• Obesity</li> <li>• Hypertension</li> <li>• Diabetes</li> <li>• Cardiovascular disease</li> <li>• Physical inactivity</li> <li>• First-degree family history of dementia</li> <li>• Dyslipidemia</li> <li>• Poor sleep</li> <li>• Poor diet</li> </ul> |
| <b>Subjective Cognitive Impairment</b>           | Self-experienced persistent decline in cognitive capacity in comparison with a previously normal status and | Answer "yes" to both of the following questions: "Do you feel like your memory or thinking is becoming worse?" and "Does                                                                                                                                                                                                                                                         |

|                                                      |                                                       |                                                                                                                                                                                                                                                                                                                                                                                                                                                     |
|------------------------------------------------------|-------------------------------------------------------|-----------------------------------------------------------------------------------------------------------------------------------------------------------------------------------------------------------------------------------------------------------------------------------------------------------------------------------------------------------------------------------------------------------------------------------------------------|
| <b>(SCI)</b> <sup>54</sup>                           | unrelated to an acute event.                          | this concern you?"<br>Global Clinical Dementia Rating (CDR) scale = 0, Logical Memory II above Alzheimer's Disease Neuroimaging Initiative (ADNI) education-adjusted cutoffs ( $\geq 9$ for 16+ years of education; $\geq 5$ for 8-15 years of education; $\geq 3$ for 0-7 years of education); Alzheimer's Disease Assessment Scale-Cognitive(ADAS-Cog) word list recall score $>5$ ; Montreal Cognitive Assessment (MoCA) total score $\geq 25$ . |
| <b>Mild Cognitive Impairment (MCI)</b> <sup>27</sup> | Concern regarding a change in cognition.              | Report from patient and/or informant of such.                                                                                                                                                                                                                                                                                                                                                                                                       |
|                                                      | Impairment in one or more cognitive domains.          | One or more of the following:<br><ul style="list-style-type: none"> <li>• Logical memory below ADNI cutoffs (<math>\geq 9</math> for 16+ years of education; <math>\geq 5</math> for 8-15 years of education; <math>\geq 3</math> for 0-7 years of education).</li> <li>• ADAS-Cog word list recall <math>&lt;6</math>.</li> <li>• MoCA score 13-24 inclusive.</li> <li>• Global CDR<math>&gt;0</math>.</li> </ul>                                  |
|                                                      | Preservation of independence in functional abilities. | Score $>14/23$ on the Lawton-Brody Instrumental Activities of Daily Living (IADL) scale.                                                                                                                                                                                                                                                                                                                                                            |
|                                                      | Not demented.                                         | Global CDR $\leq 0.5$ .                                                                                                                                                                                                                                                                                                                                                                                                                             |

### 5.2.2 Exclusion Criteria

Participants who meet **ANY** of the following criteria will be excluded from the study:

- A diagnosis of dementia
- Participants living in Nursing Homes or Adult Residential Facilities (Special Care Homes) will be excluded.
- Serious underlying disease, which, in the opinion of the study physician excludes engagement in interventions or may interfere with the participant's ability to participate fully in the study.
- Has had surgery within the last two months or has planned surgery in the coming 12 months that, deemed by the study physician, could interfere with the

1  
2  
3 participant's vision, hearing, mobility or any other ability to participate in the  
4 study.  
5

- 6 • Has a history of intracranial surgery.
- 7
- 8 • Regular Benzodiazepine use by a participant that the study physician determines  
9 to be significant enough to interfere with the participants ability to participate in  
10 the assessments and interventions in the study will be excluded.
- 11
- 12 • Presence of major depression, schizophrenia, severe anxiety or drug/alcohol  
13 abuse or other medical illness that would prohibit them from safely participating  
14 in the study or may cause harm to the participant.
- 15
- 16 • Current Parkinsonism or any neurological disorder with residual motor deficits  
17 (e.g. stroke with motor deficit), active musculoskeletal disorders (e.g. severe  
18 osteoarthritis of lower limbs) or history of knee/hip replacement affecting gait  
19 performance during the baseline assessment.
- 20
- 21 • Severe visual and/or auditory impairment, which, according to the vision and  
22 hearing assessment, precludes the participant from engaging in the trial.
- 23
- 24 • Intention to enroll in other clinical trials during the same time period.
- 25
- 26 • Active participation in an organized and planned exercise program involving  
27 aerobic exercise and/or resistance training regimen in previous 6 months.  
28  
29  
30  
31  
32  
33  
34  
35

### 36 **5.2.3 Screen Failures**

37 Screen failures are defined as participants who have completed the Screening Visit but  
38 do not meet the inclusion criteria for any of the three populations under study (MCI, SCI,  
39 or CI with risk factors). These participants who have failed the screening criteria are  
40 ineligible for participation and will be informed that they do not meet the study's  
41 inclusion criteria and they will be thanked for their time. They will be encouraged to try  
42 to participate in future studies for which they may be eligible and they will have an  
43 opportunity to ask questions pertaining to their screening for SYNERGIC@Home.  
44  
45  
46  
47  
48  
49  
50

### 51 **5.2.4 Study Care Partner**

52 All participants will be asked about whether they wish to have a study care partner such  
53 as a spouse, close friend, or relative participate along with them in the trial. Specifically,  
54  
55

1  
2  
3 the care partner's role will be to participate in assessments such as the CDR (as in  
4 Table 1) as it requires a study care partner. Care partners will be specifically told that  
5 their only role is to help us complete the CDR. If the participant does not have a care  
6 partner on the day of their assessment (someone to attend the virtual visit with them),  
7 the informant portion of the assessment (the CDR) can be completed by phone.. This  
8 will be arranged and completed by the site research coordinator.  
9  
10  
11  
12  
13

14 A participant will not be excluded from the study if they do not have access to or wish to  
15 have a study care partner. However, if the individual during screening is deemed to  
16 have MCI or SCI, or the study physician determines that their participation without a  
17 study care partner would be a risk—then the participant will be asked to name a study  
18 care partner for their participation in the trial.  
19  
20  
21  
22  
23

24 We believe that in certain instances, such as in the case of couples, some study care  
25 partners may also want to be a participant, however because participants are meant  
26 to be blinded as to which experimental condition they are in—we will ask that care  
27 partners remain as care partners and do not occupy the role of participant in the study.  
28  
29  
30  
31

### 32 **5.2.5 Strategies for Recruitment**

33  
34 Community dwelling older adults from both Anglophone and Francophone communities  
35 throughout New Brunswick will be recruited using recruitment methods and tools  
36 included in Appendix B. These recruitment materials will be available in both official  
37 languages. Interested participants will be directed to contact study personnel through  
38 the NB-PALM website. A dedicated email address ([synergic@unb.ca](mailto:synergic@unb.ca)) will be  
39 established. The following recruitment tools will be used to inform potential study  
40 participants living throughout New Brunswick about the study:  
41  
42  
43  
44  
45  
46

- 47 • Flyer (Appendix B) for posting on various community organization websites, and  
48 healthcare provider websites, social media, and in physical offices.
- 49 • Email (Appendix B) for distribution to potential study participants referred by  
50 others.  
51  
52  
53  
54

- Paid newspaper advertisements (Appendix B) in selected local newspapers.

These tools will be applied in various ways to reach potential study participants. The offices of primary care physicians/providers and specialists will be provided with a study flyer for posting. They will be invited to refer potential participants from their practices. An information handout (See Appendix B) describing the study will be used to familiarize providers with the study. Interested participants can be directed to contact study personnel through the NB-PALM website and visit the dedicated SYNERGIC@Home study page.

Participants currently enrolled in the COMPASS ND cohort study in Saint John, NB will also be contacted to ask about their interest in participating. A follow-up email (Appendix B) will be sent to these potential participants.

Existing community resources such as the Seniors' Centres, Community Health Centres, and Community Mental Health Centres as well as recreation facilities and libraries will be provided with study information to post on social media (if available) and news/what's happening section of their websites (if available) and / or distribute to their membership via email or hard copy or digital newsletters. The Community Developers working in the Vitalité and Horizon Health Networks have many contacts and connections with formal and informal community groups and networks. Study flyers and a generic email will be provided for distribution to these organizations with whom they are connected. Study information will be provided to two particular provincial programs: Senior Goodwill Ambassador Program and Go Ahead Seniors/Aînés en Marche, both of which provide physical activity and lifestyle modification programs to community dwelling older adults. Similar organizations will also be contacted and invited to distribute information about the study.

Study flyers will be sent to the leadership of provincial English and Francophone seniors' organizations including the Association francophone des aînées et des aînés du Nouveau-Brunswick and NB Senior Citizen's Federation as well as community

1  
2  
3 partners such as the NB Alzheimer's Society for posting on their websites and social  
4 media platforms. Targeted provincial organizations like the NB Society of Retired  
5 Teachers and Société des Enseignantes et des Enseignants Retraités Francophones  
6 du Nouveau-Brunswick (SERFNB) also have websites as well as local branches to  
7 whom the study flyer and generic email will be provided for distribution.  
8  
9

10  
11  
12  
13 Paid newspaper advertisements will be purchased in selected urban and community-  
14 based rural newspapers.  
15

16  
17  
18 When a member of the research team receives an expression of interest email from a  
19 potential study participant through the NB-PALM website or other referral sources as  
20 listed above, a generic email and/or study flyer and consent package will be sent by  
21 email. Once a study participant is ready to give consent, a first contact discussion guide  
22 (Appendix B) will be followed by research personnel to ensure that a consistent  
23 approach is used to obtain participants' consent.  
24  
25  
26  
27  
28

### 29 **5.2.6 Strategies for Retention**

30  
31 Retention of participants will be pursued through various methods. News about the  
32 study will be posted on the NB-PALM website and participants will be encouraged to  
33 visit the page dedicated to the SYNERGIC@Home. Research personnel will be  
34 provided with key messages to use in their interactions with study participants to keep  
35 them informed.  
36  
37  
38  
39

40  
41 Participants that do not comply with the intervention schedule may be withdrawn from  
42 the study at the discretion of the research team. Research Assistants will make all  
43 efforts to allow participants to have flexibility with their intervention schedules and  
44 participants will be allowed to make up missed intervention dates within the week that  
45 they occur. Since this is a feasibility study, intervention schedule deviations will be  
46 closely tracked but no rigid rule of number of missed interventions before withdrawal  
47 occurs will be employed. Each case will be individually evaluated and the benefit of the  
48 doubt given in an attempt to observe the compliance behaviour patterns of participants  
49 across the entire 16 week intervention duration.  
50  
51  
52  
53  
54



### 5.3 ASSESSMENTS TOOLS

Participants in all four arms will have a series of validated assessments performed at the Screening, Baseline (T0), Immediate post intervention follow-up at 4 months (T4), and 6-month post-intervention follow-up (T10), as shown in \* Time between clinical and activity sessions will be kept within 3 days with an allowable range of 1-7 days.

Figure 2. All elements of each assessment will be collected via video conferencing (Zoom for Healthcare®). All assessments are itemized in Table 2 (below).

All participants will also be given an ActiGraph (ActiGraph GT9X®) device, a measuring tape, some exercise materials (such as resistance bands or a stretching mat). Please see the complete list in Appendix B). These items will be delivered and picked up by a secure mailing and parcel service or secure courier. The ActiGraph device will be worn on the participant's wrist, hip, or ankle for 10 consecutive days, at three separate time points (baseline, immediate post intervention follow up and 6 month post intervention follow up). These devices will be used to measure nightly sleep patterns and daily activity levels.

**Table 2.** Assessments across Study Visits for SYNERGIC@Home Trial

| Assessment                                | Clinical Screening | Physician Conference | Clinical T0 | Activity T0 | Clinical T4 | Activity T4 | Clinical T10 | Activity T10 |
|-------------------------------------------|--------------------|----------------------|-------------|-------------|-------------|-------------|--------------|--------------|
| <b>Consent</b>                            |                    |                      |             |             |             |             |              |              |
| Participant Informed Consent              | •                  |                      |             |             |             |             |              |              |
| Study Partner Informed Consent            | •                  |                      |             |             |             |             |              |              |
| <b>General Health and Medical History</b> |                    |                      |             |             |             |             |              |              |
| Demographics                              | •                  |                      |             |             |             |             |              |              |
| Medical Vitals                            | •                  |                      | •           |             | •           |             | •            |              |

| Assessment                                     | Clinical Screening | Physician Conference | Clinical T0 | Activity T0 | Clinical T4 | Activity T4 | Clinical T10 | Activity T10 |
|------------------------------------------------|--------------------|----------------------|-------------|-------------|-------------|-------------|--------------|--------------|
| Medical History <sup>1</sup>                   | •                  |                      | •           |             | •           |             | •            |              |
| Inclusion and Exclusion Criteria               |                    | •                    |             |             |             |             |              |              |
| Diagnostic Summary / Diagnostic Validation     |                    | •                    |             |             | •           |             | •            |              |
| <b>Cognitive Testing</b>                       |                    |                      |             |             |             |             |              |              |
| Telephone Cognitive Screening TCogS            | •                  |                      |             |             | •           |             | •            |              |
| Full MoCA via Audio-Visual Conference          | •                  |                      |             |             | •           |             | •            |              |
| Lawton-Brody IADL                              | •                  |                      |             |             | •           |             | •            |              |
| <i>Cognitive Functional Composite (CFC-2)</i>  |                    |                      |             |             |             |             |              |              |
| ADAS-Cog 3 Immediate Word Recall               | •                  |                      |             |             | •           |             | •            |              |
| ADAS-Cog 3 Delayed Word Recall                 | •                  |                      |             |             | •           |             | •            |              |
| ADAS-Cog 3 Orientation                         | •                  |                      |             |             | •           |             | •            |              |
| Clinical Dementia Rating Scale (CDR) Cognitive | •                  |                      |             |             | •           |             | •            |              |
| Functional Activities Questionnaire            | •                  |                      |             |             | •           |             | •            |              |
| <i>Additional Cognitive Outcomes</i>           |                    |                      |             |             |             |             |              |              |
| Oral Trail Making Test (Part A & B)            |                    |                      | •           |             | •           |             | •            |              |
| Boston Naming Test                             |                    |                      | •           |             | •           |             | •            |              |
| Logical Memory I & II                          | •                  |                      |             |             | •           |             | •            |              |
| ADAS-Cog Word Recognition                      |                    |                      | •           |             | •           |             | •            |              |
| DKEFS Phonemic Fluency Test                    |                    |                      | •           |             | •           |             | •            |              |
| DKEFS Semantic Fluency Test                    |                    |                      | •           |             | •           |             | •            |              |
| Digit Span Backward Test                       |                    |                      | •           |             | •           |             | •            |              |

| Assessment                                           | Clinical Screening | Physician Conference | Clinical T0 | Activity T0 | Clinical T4 | Activity T4 | Clinical T10 | Activity T10 |
|------------------------------------------------------|--------------------|----------------------|-------------|-------------|-------------|-------------|--------------|--------------|
| Digit Symbol Modalities Test-Oral Version            |                    |                      | •           |             | •           |             | •            |              |
| <b>Diet Assessments</b>                              |                    |                      |             |             |             |             |              |              |
| Mediterranean Diet Assessment (MDA-14)               | •                  |                      |             |             | •           |             | •            |              |
| Eating Pattern Self-Assessment (EPSA)                |                    |                      | •           |             | •           |             | •            |              |
| Vitamin D Intake Questionnaire                       |                    |                      | •           |             | •           |             | •            |              |
| <b>Sleep Assessments</b>                             |                    |                      |             |             |             |             |              |              |
| Pittsburgh Sleep Quality Index (PSQI-18)             | •                  |                      |             |             | •           |             | •            |              |
| Consensus Sleep Diary (CSD)                          | •                  |                      |             |             | •           |             | •            |              |
| Sleep and Activity Monitoring                        |                    |                      |             | •           |             | •           |              | •            |
| <b>Functional and Activity Level</b>                 |                    |                      |             |             |             |             |              |              |
| Physical Activity Scale for the Elderly (PASE)       |                    |                      |             | •           |             | •           |              | •            |
| Life Space Questionnaire (LSQ)                       |                    |                      |             | •           |             | •           |              | •            |
| Clinical Frailty Scale (CFS)                         | •                  |                      |             |             | •           |             | •            |              |
| <b>Mental Health and Well Being</b>                  |                    |                      |             |             |             |             |              |              |
| Short Form Quality of Life Questionnaire SF36        | •                  |                      |             |             | •           |             | •            |              |
| Generalized Anxiety Disorder (GAD-7)                 | •                  |                      |             |             | •           |             | •            |              |
| Geriatric Depression Scale (GAD-30)                  | •                  |                      |             |             | •           |             | •            |              |
| COVID-19 Questionnaires                              | •                  |                      |             |             | •           |             | •            |              |
| <b>Health Literacy</b>                               |                    |                      |             |             |             |             |              |              |
| Short Test of Func.Health Literacy in Adults STOFHLA |                    |                      | •           |             |             |             |              |              |
| <b>Technology Ability Use</b>                        |                    |                      |             |             |             |             |              |              |

| Assessment                                       | Clinical Screening                        | Physician Conference | Clinical T0 | Activity T0 | Clinical T4 | Activity T4 | Clinical T10 | Activity T10 |
|--------------------------------------------------|-------------------------------------------|----------------------|-------------|-------------|-------------|-------------|--------------|--------------|
| FACETS                                           |                                           |                      |             | •           |             | •           |              | •            |
| <b>Gait and mobility Assessments<sup>2</sup></b> |                                           |                      |             |             |             |             |              |              |
| Usual Gait                                       |                                           |                      |             | •           |             | •           |              | •            |
| Seated Dual Task                                 |                                           |                      |             | •           |             | •           |              | •            |
| Dual Task Gait Assessment                        |                                           |                      |             | •           |             | •           |              | •            |
| One Minute Sit to Stand Test (STST)              |                                           |                      |             | •           |             | •           |              | •            |
| Get Active Questionnaire                         | •                                         |                      |             |             |             |             |              |              |
| Falls Calendar                                   |                                           |                      | •           |             | •           |             | •            |              |
| <b>Intervention Preference</b>                   |                                           |                      |             |             |             |             |              |              |
| Preference Questionnaire                         |                                           |                      |             | •           |             | •           |              | •            |
| <b>Biological Markers<sup>3</sup></b>            |                                           |                      |             |             |             |             |              |              |
| Polygenic Hazard Score (PHS)                     | <i>Any point throughout trial</i>         |                      |             |             |             |             |              |              |
| <b>Study Exit</b>                                |                                           |                      |             |             |             |             |              |              |
| Exit Questionnaire                               | <i>At time of finishing/exiting trial</i> |                      |             |             |             |             |              |              |

<sup>1</sup>Full history collected at Clinical Screening and updated thereafter.

<sup>2</sup>Gait velocity assessed using Actigraphy (ActiGraph GT9X).

<sup>3</sup>Self-collected via an optional saliva sample.

## 6. OUTCOMES

### 6.1 PRIMARY FEASIBILITY OUTCOMES

#### 6.1.1 Intervention Adherence

Measured as the mean percent of all Intervention sessions attended of the 48 planned sessions per participant.

### 6.2 SECONDARY FEASIBILITY OUTCOMES

#### 6.2.1 Recruitment Enrollment Rate

Measured as the total percent of enrolled participants relative to number of people screened for eligibility.

#### 6.2.2 Enrollment Retention Rate

Measured as the total percent of enrolled participants who continue throughout the trial and participate in outcomes assessments as follows (see Figure 3):

- Enrollment retention: of those enrolled participants, the % who complete immediate post intervention follow-up (T4) assessment, and;
- Follow-up retention: of those who complete the immediate post intervention follow-up (T4) assessment, the % of participants who complete the 6-month post-intervention follow-up (T10) assessment.

#### 6.2.3 Assessment Tolerability

Measured as the number of voluntary dropouts occurring either during or between baseline assessment (both clinical and activity assessment batteries) and prior to allocation to an intervention group.

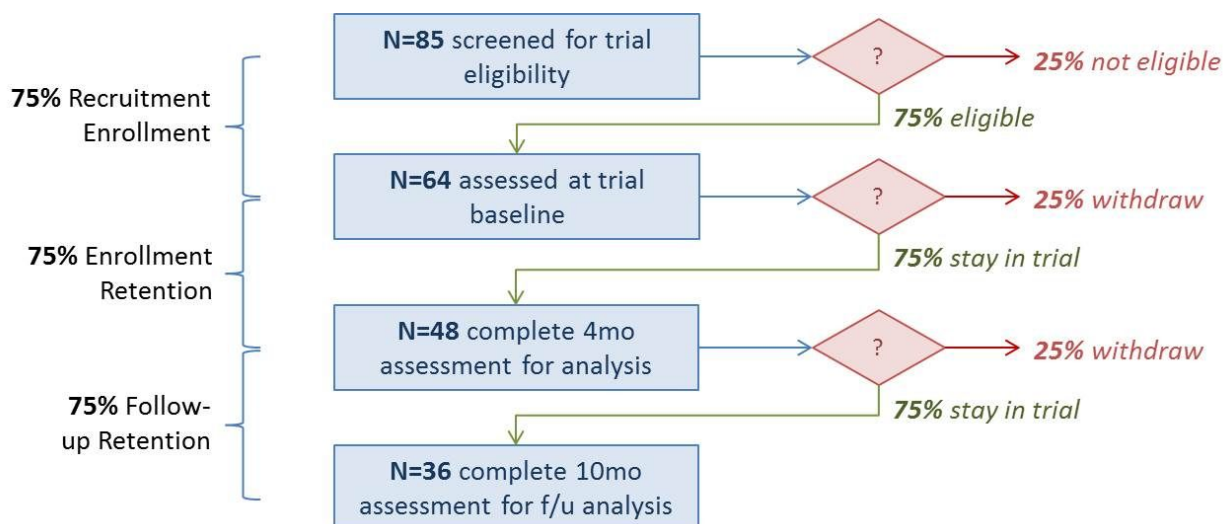

Figure 3. Attrition flowchart for SYNERGIC@Home trial.

### 6.2.4 Trial Experience

A mixed a methods approach will be used to explore participant experience after the trial. Trial experience is defined as participants' qualitative responses to semi-structured open-ended questions aimed at providing insights on their overall trial experience within the context of the Kirkland evaluation framework, .

### 6.2.5 Adverse Events

Frequency cross-tabulation of AE severity versus AE relation to trial.

### 6.2.6 Data Loss

Defined as data lost due to technical failures, personnel errors or participant non-compliance. Technical failures resulting in data loss include problems with electronic equipment or internet communications, for example. Personnel errors would include issuing improperly configured equipment, scheduling errors, and protocol deviations (omitting assessments, for example) that result in data loss. Participant non-compliance would encompass data loss due to participants not following instructions or omitting responses on surveys, for example.

## 6.3 PRIMARY ANALYTIC OUTCOMES

### 6.3.1 Intervention Preference

The primary analytic goal of SYNERGIC@Home is to assess the relationship between participants' adherence to the interventions and their affinity for each intervention going into the trial. All participants will be given the Intervention Preference Questionnaire (IPQ, Appendix A) prior to implementation of the intervention at baseline (T0) and after the 4mo intervention (T4).

The IPQ asks participants various questions about their affinity for the offered interventions by quantifying interest level and preferences for the interventions. When administered at T0 (prior to randomization) we will explain to participants that their responses on the questionnaire will not in any way influence the intervention group they will be randomly assigned to.

The IPQ has five questions. Question 1 asks participants to rate their interest level in each intervention type (exercise training and cognitive training independently) on a 0-10 visual analog scale. Question 2 asks participants to rate their preference between the two interventions on a 5-point scale:

-2=Strong preference for Exercise training;

-1=Slight preference for Exercise training;

0=No preference;

1=Slight preference for Cognitive training;

2=Strong preference for Cognitive training.

Questions 3 to 5 are open ended questions that will provide context to participants' responses from questions 1 and 2.

**Validation:** The intervention preference questionnaire has been created specifically for this feasibility trial, thus it has not been previously validated.

## 6.4 SECONDARY ANALYTIC OUTCOMES

### 6.4.1 Demographic Information and Medical History

Demographic information, chronic diseases, vascular risk factors (VRFs), medical history, medications, fall history using self-reports of falls on a fall calendar will be collected at the screening visit. In addition, medical vitals will be assessed including weight, height, blood pressure and heart rate (using a simple blood pressure cuff that will be provided to the participant).

*Validation:* This information will be collected by self-report and will be done via video conference. While medical history taking have not been systematically evaluated in this setting it is commonly used in remote telemedicine and is considered an acceptable practice and a reasonable alternative to face to face history taking. We are confident that results will be similar to those assessed in person. We are confident that participants will be able to adequately measure their vitals and report the findings to the study personnel.

### 6.4.2 Cognitive Testing

Cognitive outcomes will be measured using the Cognitive Functional Composite 2 (CFC-2), the Telephone Cognitive Screening (TCogS), the Montreal Cognitive Assessment (MoCA), and select items from the Alzheimer's Disease Assessment Scale-Cognitive (ADAS-Cog Plus).

#### TCogS and MoCA.

- **The Telephone Cognitive Screening TCogS** is a widely used tool that measures cognitive function in older individuals. The telephone version of the CogS has been standardized and will be administered via video conferencing. It consists of a 26-point assessment that measures orientation, registration, attention and calculation, recall, and language with lower scores indicating cognitive impairment<sup>55,56</sup>.



1  
2  
3        Validation: The TCogS will be administered using the standardized and validated  
4 telephone version<sup>56-58</sup> via video conferencing.

- 5  
6  
7        • **The Full MoCA via Audio-Visual Conference** consists of a 30-point test  
8 assessing the following items: short term memory recall, visuospatial abilities,  
9 executive functioning, phonemic fluency, verbal abstraction, attention,  
10 concentration, working memory, language, and orientation<sup>59</sup>.

11  
12        Validation: The remote version of the MoCA will be administered using the  
13 validated online full MoCA (version 8.1) via audio-visual conference<sup>58,60</sup>.

14  
15  
16  
17  
18        **Clinical Dementia Rating Scale (CDR).** The CDR is a validated 5-point composite  
19 scale used in longitudinal Alzheimer's Disease (AD) research to characterize cognitive  
20 and global function performance applicable to AD and related dementias.<sup>61</sup> Information  
21 is obtained through a semi-structured interview of the patient and a reliable informant or  
22 collateral source (e.g. family member). The three cognitive domains include memory,  
23 orientation, and judgment/problem solving and the three functional domains include  
24 community affairs, home and hobbies and personal care. The five possible scores for  
25 each domain [0, 0.5, 1, 2, and 3] represent a range of impairment (e.g. score of 0  
26 represents no impairment and a score of 3 represents severe impairment).

27  
28        Validation: The CDR is a questionnaire which can be administered via any interface  
29 (face-to-face or video conferencing). We will administer it via video conferencing.  
30 Clinical experience dictates that this method of delivery of the CDR will be sufficient.

31  
32  
33  
34  
35        **Lawton-Brody Instrumental Activities of Daily Living (IADL) scale.** The IADL will be  
36 administered as part of the functional assessments of this trial and serve as an inclusion  
37 criteria of preservation of function (score > 14/23). It measures participant's ability to  
38 engage in instrumental activities of daily living via questionnaire assessing activities  
39 such as preparing meals and managing personal finances<sup>3</sup>. Responses range from 0  
40 (normal ability) to 3 (dependent for functioning) with total scores ranging from 0 to 23.

1  
2  
3 *Validation:* This assessment of functional independence is collected via questionnaire,  
4 which can be administered via any interface (face-to-face or video conferencing). We  
5 will administer it via video conferencing  
6  
7

8  
9 **Cognitive Functional Composite (CFC-2).** The CFC consists of the following tests<sup>5,6</sup>.  
10 The first three tests originate from the ADAS-Cog 13, which has been used a primary  
11 outcome measure in numerous trials with individuals at risk for developing ADRDs<sup>7,8</sup>.  
12  
13  
14

- 15  
16 a) **ADAS-Cog Immediate Word Recall.** Participants are presented with 10 high  
17 imagery words and are given three trials to learn and recall them. The average of  
18 the 3 trials is computed for the final score.  
19

20  
21 *Validation:* This is a subtest of the ADAS-cog, which has been validated for  
22 remote, virtual use<sup>9</sup>.  
23

- 24 b) **ADAS-Cog Delayed Word Recall.** Participants are asked to recall the 10 high  
25 imagery words presented during the immediate word recall task after a delay of  
26 approximately 5 to 10 minutes.  
27

28  
29 *Validation:* This is a subtest of the ADAS-cog, which has been validated for  
30 remote, virtual use<sup>9</sup>.  
31

- 32  
33 c) **ADAS-Cog Orientation.** Participants are asked 8 questions pertaining to their  
34 identity, the place, and the time.  
35

36  
37 *Validation:* This is a subtest of the ADAS-cog, which has been validated for  
38 remote, virtual use<sup>9</sup>.  
39

- 40 d) **Clinical Dementia Rating Sum of Boxes (CDR-SB) Cognitive portion.** The  
41 CDR is being administered in full for this trial. The sum of boxes score simply  
42 reflects the total score from all domains assessed. The CFC-2 includes the CDR-  
43 SB for all cognitive portions, which consists of a sum of scores obtained from the  
44 following CDR domains: memory, orientation, and judgement & problem solving.  
45

46  
47 *Validation:* The CDR is a questionnaire which can be administered via any  
48 interface (face-to-face or video conferencing). We will administer it via video  
49 conferencing. Clinical experience dictates that this method of delivery will be  
50 sufficient.  
51  
52  
53  
54

1  
2  
3 e) **Functional Activities Questionnaire.** This questionnaire will be administered as  
4 part of the functional assessments of this trial. It measures participant's ability to  
5 engage in instrumental activities of daily living via questionnaire assessing  
6 activities such as preparing meals and managing personal finances<sup>3</sup>. Responses  
7 range from 0 (normal ability) to 3 (dependent for functioning) with total scores  
8 ranging from 0 to 30. For the CFC-2 total score, this score will be added to obtain  
9 a total CFC-2 composite score.

10  
11 Validation: This assessment of functional independence is collected via  
12 questionnaire, which can be administered via any interface (face-to-face or video  
13 conferencing). We will administer it via video conferencing.  
14

15  
16 **Additional Cognitive Outcomes.** We will also administer additional cognitive  
17 outcomes including the following:  
18

- 19  
20  
21  
22  
23  
24  
25  
26  
27  
28  
29  
30  
31  
32  
33  
34  
35  
36  
37  
38  
39  
40  
41  
42  
43  
44  
45  
46  
47  
48  
49  
50  
51  
52  
53  
54  
55  
56  
57  
58  
59  
60
- **The Oral Trail Making Test (TMT) A & B** is a two-part test that assesses attention speed, and mental flexibility and has been widely used in clinical settings for assessing deficits in attention and executive functioning.<sup>62</sup> The oral version of the Trail Making Test provides an assessment of sequential set-shifting without the motor and visual demands of the written Trail Making Test.<sup>10</sup> For Part A, participants are asked to count from 1 to 25 as quickly as possible. For Part B, participants are asked to switch between number and letter in sequential order (e.g. 1-A, 2-B, 3-C) until the number 13 is reached. Scoring is the total time to complete each part.

Validation: The oral trail making tests A & B are validated assessments that can be conducted remotely without the need for the traditional paper and pencil face-to-face modality.<sup>10</sup> We will administer them both using video conferencing.

- **The Boston Naming Test (BNT)** assesses visual confrontational naming and asks participants to name simple line drawings of objects.<sup>11</sup>

Validation: To our knowledge, the BNT has not yet been validated for remote, virtual, or phone use, thus we show participants each item on the screen during

1  
2  
3 the video conference. It is noteworthy that this mode of administration (in  
4 comparison to face-to-face-assessment) has not been methodically validated.

- 5  
6  
7 • **Logical Memory I & II** (Story A) from the Wechsler memory scale assesses  
8 memory and free recall<sup>63</sup>. This test will be completed via video conferencing in  
9 which the participant will be instructed to listen to a story and repeat it back after  
10 it has been read to the best of his/her. The participant will then be asked to recall  
11 the story approximately 30 minutes later.

12  
13  
14  
15 *Validation:* Because this test is an auditory test to begin with (i.e., it does not  
16 require visual stimuli such as paper and pencil questionnaires), it can be  
17 administered using any modality (face-to-face or via video conference). We will  
18 conduct it via video conferencing.

- 19  
20  
21  
22 • **ADAS-Cog Word Recognition.** Participants are presented with a list of 12  
23 words and are then asked to identify the words among a list of distractor words.

24  
25 *Validation:* This is a subtest of the ADAS-cog, which has been validated for  
26 remote, virtual use<sup>9</sup>.

- 27  
28  
29 • **DKEFS Phonemic (Letter) Fluency.** The Delis-Kaplan Executive Function  
30 System (DKEFS) phonemic fluency test measures phonemic verbal fluency,  
31 whereby participants are given 60 seconds to produce as many words that begin  
32 with the letter C, followed by a second 60 second trial with the letter “F”, and a  
33 third 60 second trial with the letter “L”<sup>13</sup>.

34  
35  
36  
37  
38 *Validation:* This test has been validated for telephone use, as results are  
39 statistically similar to those done face-to-face<sup>64</sup>. We will administer it via video  
40 conferencing.

- 41  
42  
43 • **DKEFS Semantic Fluency Test.** The Delis-Kaplan Executive Function System  
44 (DKEFS) semantic fluency test measures speed and flexibility of verbal thought,  
45 whereby participants are asked to name as many items as possible in a specified  
46 category (vegetables and animals). Unique responses during the first minute of  
47 each category are counted<sup>13</sup>.

48  
49  
50  
51 *Validation:* This test has been validated for telephone use<sup>14</sup>. We will administer it  
52 via video conferencing.

- **Digit Span Backward Test.** The digit span test is an auditory attention task, in which participants are asked to recall a series of numbers forward and backward. *Validation:* This test has been validated for telephone use<sup>14</sup>.
- **Digit Symbol Modalities Test-Oral Version.** This is a timed task that gives participants 120 seconds to orally match geometric figures with specific numbers according to a defined key (specifying which symbols are assigned to which numbers) that is provided at the top of the stimulus page<sup>15,65</sup>. *Validation:* The oral version of this test has been validated<sup>15</sup>. We will administer it via video conferencing.

#### 6.4.3 Sleep Patterns

Sleep habits will be assessed using the 18-item Pittsburgh Sleep Quality Index (PSQI-18)<sup>66</sup> and the Work and Sleep Diary (WSD)<sup>16</sup>.

*Validation:* Both sleep assessments are done via validated questionnaires which can be administered via any interface (face-to-face or video conferencing). We will administer them via video conferencing.

#### 6.4.4 Diet Patterns

Diet habits, food consumption, and nutrition intake will be assessed using the 14-item Mediterranean Diet Assessment (MDA-14)<sup>67</sup>, the Eating Pattern Self-Assessment (developed by the CCNA team), and a short questionnaire for Vitamin D intake.<sup>68</sup>

*Validation:* All diet assessments are done via questionnaires which can be administered via any interface (face-to-face or video conferencing). We will administer them via video conferencing.

#### 6.4.5 Functional Independence and Activity Level

Additional descriptors of functional health and independence will also be tested including: the activities of daily living—using the Lawton-Brody Instrumental Activities of Daily Living (IADL) scale<sup>3</sup>, the physical activity scale for the elderly (PASE)<sup>69</sup>, and the Life Space Questionnaire (LSQ)<sup>70</sup>.

1  
2  
3 *Validation:* All of the above assessments of functional independence and activity level  
4 are collected via questionnaires which can be administered via any interface (face-to-  
5 face or video conferencing). We will administer them via video conferencing.  
6  
7  
8  
9

10 We will also obtain a measure of clinical frailty using the Clinical Frailty Scale.

- 11  
12  
13 • **Clinical Frailty Scale (CFS).** This assessment will be performed by the Clinical  
14 Research Coordinator/nurse using the 9 point CFS instrument<sup>71</sup>. This will allow  
15 for a determination of the clinical frailty of the participants.  
16  
17

18 *Validation:* The use of the CFS by remote video conferencing has not been  
19 evaluated but it is thought that this will be a reasonable way to gather information  
20 needed to determine the CFS score. The information needed is obtained by  
21 history and self-report from the participant.  
22  
23  
24  
25

#### 26 **6.4.6 Psychiatric Health and Well-Being**

27 Psychiatric health and well-being will be assessed using the Short Form quality of life  
28 questionnaire (SF-36)<sup>72</sup>, the Generalized Anxiety Disorder 7 (GAD-7)<sup>73</sup>, Geriatric  
29 Depression Scale (GDS-30)<sup>74</sup>, and the COVID-19 Questionnaires—that aim to delineate  
30 the impacts of the COVID-19 pandemic of 2020<sup>75</sup>. An additional New Brunswick (NB)  
31 COVID 19 questionnaire will also be administered. This tool has been adapted from a  
32 telephone survey conducted by Ability NB used to evaluate the effect of COVID 19 on  
33 participants living in the community who have physical disability.  
34  
35  
36  
37  
38  
39  
40

41 *Validation:* The psychiatric health and well-being assessments (SF-36, GAD-7, and  
42 GDS-30), are well-established questionnaires, which can be administered via any  
43 interface (face-to-face or video conferencing); we will administer them via video  
44 conferencing. The COVID-19 questionnaires have been specifically developed during  
45 the pandemic of 2020. They have not yet been validated. We will administer them via  
46 video conferencing.  
47  
48  
49  
50  
51  
52  
53  
54  
55

#### 6.4.7 Health Literacy

Health Literacy will be assessed using the abbreviated version of the Test of Functional Health Literacy in Adults (TOFHLA)<sup>108</sup>. The short version, STOFHLA, consists of 2 prose passages and 4 numeracy items.

*Validation:* A preliminary study demonstrated that the results of the S-TOFHLA administered through a computer were equivalent to those when administered on paper.<sup>109</sup> We will administer the S-TOFHLA in a digital format, over video conferencing.

#### 6.4.8 Technology Ability and Use

To assess the extent to which participants are comfortable with and familiar with basic technology, we will administer the Functional Assessment of Currently Employed Technology Scale (FACETS)<sup>76</sup>. The FACETS is a 10-item questionnaire with possible responses falling on a Likert-type scale, and higher scores indicating more frequent use of technology domains<sup>77,78</sup>. While the FACETS will not be used as part of the eligibility criteria, we feel that it will be a worthwhile endeavor to delineate the potential change in technology use over the course of the home-based remote trial.

*Validation:* The FACETS is typically administered via questionnaires which can be administered via any interface (face-to-face or video conferencing). We will administer it via video conferencing.

#### 6.4.9 Gait and Mobility Assessments

Gait performance will be recorded using actigraphy, which can be used to determine spatiotemporal gait parameters and can be simply placed on the participant's hip. Specifically, gait parameters will be measured using the ActiGraph GT9X (the same device they use for sleep and activity monitoring), during which participants engage in a series of gait tasks via video conferencing with a study Kinesiology Research Assistant. If video conferencing poses any issues on participant's the ability to position the screen to allow the researcher to visualize the trial—then phone communication will commence instead. In all walks, participants will start 1 meter before the beginning of the 6-meter allocated space and continue to travel 1 meter past the end of the space. If a 6-meter

1  
2  
3 space is not available, then participants will be asked to use a 3 meter corridor within  
4 their home and for analyses, we will extrapolate based on this subset data. The  
5 procedure of allowing extra space prior to and after the walking distance is in place to  
6 ensure steady state walking and to minimize any effects of acceleration and de-  
7 acceleration during the course of the walk<sup>79</sup>. The reason for a 3 meter minimum  
8 distance is because this distance has been shown to sufficiently measure gait speed in  
9 older adults<sup>80</sup>. To avoid tripping or falls, participants will be instructed to walk on a  
10 smooth surface with no barriers.  
11  
12  
13  
14  
15  
16  
17

18 *Validation:* Reliability has been previously established for this protocol in people at risk  
19 for developing ADRDs and those with MCI<sup>81</sup> and an instructive video can be found at  
20 the “[www.gaitandbrain.com/resources](http://www.gaitandbrain.com/resources)” as the Guidelines for Gait Assessments in  
21 CCNA”. However, the virtual administration of this procedure has not yet been  
22 validated, thus the SYNERGIC@Home study will be the first to test its feasibility and its  
23 use at home.  
24  
25  
26  
27  
28  
29

30 The dual-task conditions selected are based on previous research which demonstrated  
31 that counting backwards requires both working memory and attention<sup>82</sup> and naming  
32 animals is related to verbal fluency, which relies on semantic memory<sup>83</sup>. The evaluator  
33 will record any counting errors during walking so that it can be compared with the same  
34 mental tasks while seated. The seated assessments will be timed at 10 seconds and  
35 will be performed in the beginning of all cognitive assessments (at least one hour prior  
36 to the dual task gait condition) to prevent practice effects in dual-task gait performance.  
37 Seated gait assessments will be assessed via video conferencing, whereby participants  
38 are asked to complete the cognitive portion of the dual task gait test while seated. Gait  
39 assessments will be then follow and will also be conducted using video conferencing,  
40 whereby participants are asked to walk towards the camera while engaging in the  
41 cognitive tasks listed above. For details pertaining to the dual task protocol, please see  
42 our detailed manual of procedures.  
43  
44  
45  
46  
47  
48  
49  
50  
51  
52  
53  
54  
55  
56  
57  
58  
59  
60



- 1  
2  
3 • **Seated Dual Task.** Participants will be first asked to complete the cognitive tasks  
4 involved in the dual-task conditions, while seated. Specifically, participants will be  
5 asked to name as many animals as they are able to, count backwards by 1's,  
6 and count backwards by 7's while seated. This will be used as a comparison to  
7 determine the extent to which the dual-task reduces performance (their dual-task  
8 cost).  
9
- 10 • **Single-Task Gait Assessment.** Gait velocity will be assessed as the time taken  
11 to walk a specified distance (minimum 3 meters) using actigraphy (ActiGraph®  
12 GT9X Systems, Inc.). This method has been used in previous studies with older  
13 adults to measure gait parameters<sup>84</sup>. Participants will be instructed to measure a  
14 space (minimum 5 meters) in their home and to connect with the research team  
15 via video conferencing during the gait assessments. Their gait velocity will be  
16 measured 3 times. Gait variability of spatial and temporal gait variables (stride  
17 time, stride length, double support time and step width) will be measured and the  
18 coefficient of variation calculated ( $CV = (\text{standard deviation} / \text{mean}) \times 100$ ). The  
19 CV is a standardized measure of variability allowing comparison of gait variables  
20 measured in different units, having different means and range of values.  
21
- 22 • **Dual-Task Gait Assessment.** Following single-task gait, participants will perform  
23 three walks, once each under the following dual-task conditions: walking while  
24 naming animals, counting backwards from 100 by 1's, and counting backwards  
25 from 100 by 7's. Gait walks will occur within participant's homes, ideally in a large  
26 corridor or living space—but even in small spaces of at least 3 meters are  
27 suitable. Dual-tasking assessments will permit calculation of dual-task cost for all  
28 gait variables of interest.<sup>85,86</sup>  
29  
30  
31  
32  
33  
34  
35  
36  
37  
38  
39  
40  
41  
42  
43  
44  
45

46 Additional measures of gait and mobility that we will assess include falls (via a falls  
47 calendar) and mobility (via the one-minute sit-to-stand test). Both are described in detail  
48 below.  
49  
50

- 51  
52 • **Falls.** A fall is defined as 'unintentionally coming to rest on the ground, floor, or  
53 other lower level and not due to a seizure, syncope, or an acute stroke'<sup>87</sup>. Events  
54

1  
2  
3 caused by overwhelming environmental hazards (e.g., being struck by a moving  
4 object) are not considered a fall. Recurrent falls are defined as 'two or more  
5 events in a 12-month period'. Falls will be recorded throughout the trial, in which  
6 participants will be provided with a falls calendars, on which they will record any  
7 falls that have occurred, and the research team will collect them monthly. Study  
8 staff will make a final decision of whether a fall event occurred based on the  
9 provided information about the fall, and may include follow-up discussion with  
10 participant and study partner if applicable. Falls will only be monitored during the  
11 active 4mo intervention period.

12  
13  
14  
15  
16  
17  
18 *Validation:* the falls calendar is intended for participants to use on their own, thus  
19 its administration does not differ as a function of face-to-face or remote  
20 assessments.  
21  
22

- 23  
24 • **Mobility.** To further evaluate mobility, participants will be performing the one-  
25 minute sit to stand test (STST) while being assessed via video conferencing by a  
26 research team member<sup>88</sup>.

27  
28  
29 *Validation:* While the one-minute STST has been validated for use in face-to-face  
30 settings<sup>89</sup>, there are no validations to our knowledge of its use in remote settings.  
31  
32  
33  
34

#### 35 36 **6.4.10 Biological Markers: Polygenic Hazard Score (PHS)**

37  
38 PHS will be collected via saliva samples that participants will self-collect at any point in  
39 time throughout the trial. That is, participants will be mailed an unopened saliva sample  
40 collection kit from DNA Genotek© (a Canadian bio sample collection company).  
41 Participants will be monitored and assisted during the sample collection process by a  
42 research team member. There are specific instructions that must be adhered during  
43 saliva collection (such as the requirement that the sample is collected in the morning  
44 prior to consuming any food or brushing one's teeth). These instructions will be shared  
45 with participants and they will be coached via video conferencing on how to collect,  
46 store, and ship their sample. Participants will be notified that providing a saliva sample  
47 is optional and they may refuse to do so and still continue their participation throughout  
48  
49  
50  
51  
52  
53  
54  
55

1  
2  
3 the trial. Once collected, participants will be instructed to mail the unidentified sample in  
4 a mailing kit with a UNB return address to the lab in which analyses will take place.  
5  
6 Samples will be sent to the Clinical Genomics Centre in the Mount Sinai Hospital, 600  
7  
8 University Ave, Toronto, ON M5G 1X5, Canada and will be processed under the  
9  
10 guidance of Dr. Kathy Siminovitch.  
11

12  
13 The saliva sample will measure the following:  
14

- 15  
16 • **Biomarkers of ADRDs:** Polygenic Hazard Score (PHS). PHS is derived from a  
17 panel of 31 single nucleotide polymorphisms (SNPs) and has been shown to  
18 robustly predict the 10 year odds ratio of ADRDs<sup>50</sup>.  
19  
20  
21

22 The genetic content known as DNA, or deoxyribonucleic acid, will be analyzed in order  
23 to learn about genetic information that may increase a person's risk for developing  
24 dementia. This test is part of the overall outcome measure and is not a diagnostic test.  
25 Study participants will not receive results of this test. This test is not currently a standard  
26 of normal clinical care and is still under research to determine its utility in clinical  
27 practice.  
28  
29  
30  
31  
32  
33

## 34 7. STUDY INTERVENTIONS

### 35 7.1 INTERVENTION DESCRIPTION

36  
37 All participants will participate in home-based intervention sessions of 90 minutes per  
38 session three times per week for 16 weeks (48 sessions), while in communication with  
39 the research team via *Zoom for Healthcare*®. This period of time for combined  
40 interventions of exercise and cognitive training has been conducted in previous studies  
41 in a clinical environment with significant and promising results<sup>90,91</sup>, but has yet to be  
42 tested with a home-based delivery approach. Each session will last approximately 90  
43 minutes and will consist of 20-25 minutes cognitive training (NEUROPEAK®) or the  
44 cognitive training control followed by approximately 60 minutes of combined exercise  
45 intervention (AE and RT) or BAT control exercise.  
46  
47  
48  
49  
50  
51  
52  
53  
54

1  
2  
3 **Cognitive interventions: Active (NEUROPEAK™) or Control (Website**  
4 **searching/video watching (WS+V))** will be set up remotely by the research team for  
5 the participant, allowing the participant to complete the cognitive training on her/his own.  
6 There will be a research assistant available online to assist with technical questions  
7 during this testing.  
8  
9

10  
11  
12 **Exercise interventions: Active (Aerobic Exercise + Resistance Training (AE+RT))**  
13 **or Control (Balance and Toning (BAT))** will be conducted under the direct supervision  
14 and coaching of a certified exercise physiologist with certification from the Canadian  
15 Society for Exercise Physiology (CSEP; or equivalent certification). These certified  
16 trainers will administer the exercise interventions in a one trainer to one participant ratio.  
17 All arms will have an equal volume and frequency of contact over the entire duration of  
18 the study. To avoid potential imbalances in exposure time, control conditions for  
19 exercise and cognitive training will have the same duration as the active interventions.  
20  
21  
22  
23  
24  
25  
26

## 27 **7.2 INTERVENTIONS**

### 28 **7.2.1 Active Exercise Intervention: Aerobic Exercise + Resistance Training** 29 **(AE+RT)**

30 The combined aerobic exercise and resistance training intervention (AE+RT) will be  
31 home-based and held three times per week between Monday and Saturday, ensuring  
32 that it is not on three consecutive days. Whenever possible, the research coordinator  
33 will ensure that the days of the week in which interventions occur are consistent within  
34 participants (i.e., a given participant may have a training schedule of Mondays,  
35 Wednesdays, and Fridays every week, or alternatively Tuesdays, Thursdays and  
36 Saturdays). Staff trained and certified in exercise training will supervise all sessions on  
37 a one-to-one trainer to participant ratio remotely. Trainers will connect virtually using  
38 video conferencing with participants and will coach them throughout the entire session  
39 for all sessions. Difficulty of aerobic and resistance exercise will be tailored to their  
40 individual functioning level, with constant monitoring by the trainers.  
41  
42  
43  
44  
45  
46  
47  
48  
49  
50  
51  
52  
53  
54  
55  
56  
57  
58  
59  
60

The exercise program described here has been developed by a trained and certified Kinesiologist. As such, it adheres to all safety guidelines and precautions necessary in developing such programs. 3 (below) presents a general overview of the active exercise intervention (AE+RT) regimen structure with the approximate time taken to complete each portion.

**Table 3.** General overview of active intervention exercise regimen structure.

| Section                       | Type of Exercise                                   | Duration (min) |
|-------------------------------|----------------------------------------------------|----------------|
| Warm Up                       | Marching in one place with arm swings for 1 minute | 1              |
|                               | Dynamic Hamstring Stretching: 15 per side          | 1              |
|                               | Shoulder Circles: 15 per direction                 | 1              |
|                               | 15 Arm Reaches                                     | 0.5            |
|                               | Torso Twists: 15 per direction                     | 1              |
|                               | Ankle Circles: 15 per direction per side           | 2              |
|                               | Side Stepping for 1 minute                         | 1              |
|                               | 15 Quarter Squats                                  | 1              |
|                               | Total Warm Up Duration                             | 8              |
| Break                         |                                                    | 1              |
| 7 Strength Training Exercises | Chest                                              | 5              |
|                               | Upper Back                                         | 5              |
|                               | Bicep Curls                                        | 2.5            |
|                               | Abdominals                                         | 2.5            |
|                               | Mid/Lower Back                                     | 5              |
|                               | Quadriceps                                         | 5              |
|                               | Hamstrings                                         | 5              |
|                               | Total Strength Training Duration                   | 30             |
| Break                         |                                                    | 3              |
| Aerobic Exercise              | Alternating Video for Participants                 | 15             |
|                               | Total Aerobic Exercise Duration                    | 15             |
| Break                         |                                                    | 3              |
| Cool Down                     | Quadriceps Stretch                                 | 0.5            |
|                               | Hamstring Stretch                                  | 0.5            |
|                               | Calf Stretch                                       | 0.5            |
|                               | 2 Hip Stretches                                    | 0.5            |

| Section           | Type of Exercise          | Duration (min)    |
|-------------------|---------------------------|-------------------|
|                   | Static Torso Rotation     | 0.5               |
|                   | Seated Side Bend          | 0.5               |
|                   | Back and Shoulder Stretch | 0.5               |
|                   | Chest Stretch             | 0.5               |
|                   | Triceps Stretch           | 0.5               |
|                   | Neck Stretch              | 0.5               |
|                   | Total Cool Down Duration  | 5                 |
| <b>Total Time</b> |                           | <b>Approx. 65</b> |

**Warm Up.** The first 5-10 minutes of the intervention exercise session will consist of a general warm-up using dynamic stretches, which include marching in place, various stretching warm up exercises, and quarter squats.

**Strength training.** Following the general warm-up, participants will execute the strength-training portion by performing progressive strengthening exercises (including pushes and pulls using resistance bands, and chair stands). Participants will complete 7 exercises which target major muscles, including quadriceps, hamstrings, chest, back, abdominals, and synergists such as biceps and triceps. Exercise dose characteristics will be structured to elicit the greatest muscular fitness benefits with a general starting regimen consisting of 1-2 sets of high repetition, low resistance training for the first 1 to 5 weeks of the intervention. Following this, weeks 6 to 10 will consist of 2 sets of moderate repetition, moderate resistance training. And finally, weeks 11 to 16 will consist of 1-2 sets of low repetition, high resistance training. For a visual depiction of the strength training progression across the 16 weeks, please see Table 4 (below).

**Table 4.** Example progression of strength training guideline across intervention.

| Weeks    | Sets | Repetitions | Resistance Bands                                         |
|----------|------|-------------|----------------------------------------------------------|
| 1 to 5   | 1    | 15 to 20    | <i>Band Intensity will increase throughout the trial</i> |
| 6 to 10  | 2    | 10 to 15    |                                                          |
| 11 to 16 | 3    | 8 to 12     |                                                          |

Table 4 presents a general guideline demonstrating the overall progression goals of the intervention. However, realistically there are significant individual differences in starting ability and mobility levels. Therefore, while the exercise physiologist will aim to follow the progression guideline of Table 4—individualized and tailored progressive training regimens may be necessary. Therefore, the certified exercise physiologist who developed the exercise program for SYNERGIC@Home has also recommended a series of progressions across the intervention that are tailored to suit individuals at varying levels of ability. These ability levels will be assessed by the site exercise physiologist at the outset of the study. Three main progressions will be offered for each muscle group to increase challenge throughout the training period for individuals of each starting mobility and exercise ability level. All participants will be instructed to rest 30-60 seconds between sets. Training prescription for all exercises was made in accordance to the ACSM guidelines for strength development in older adults (ACSM, 1998). For details pertaining to the tailored training prescription by baseline ability, please see Table 5 (below).

**Table 5. Tailored resistance training prescription by mobility and exercise ability.**

| Low Fitness/Mobility Ability     |                                                            |                                                            |                                        |
|----------------------------------|------------------------------------------------------------|------------------------------------------------------------|----------------------------------------|
| Muscle Group                     | Starting Exercise                                          | Moderate Progression                                       | High Progression                       |
| Quadriceps                       | Seated leg press with resistance band                      | Add resistance                                             | Progress to sit-to-stand               |
| Chest                            | Seated chest press (light band)/chest fly (light band)     | Add Resistance                                             | Lengthen rep time (count 3 down, 3 up) |
| Hamstrings                       | Standing hamstring curl/hip raise                          | Lengthen rep time (count 3 down, 3 up) + (hip raise)       | Add resistance                         |
| Upper Back                       | Scapular squeeze/scapular wall hold                        | Seated resistance tube row/seated reverse fly (light band) | Add resistance                         |
| Mid/Low Back                     | Reverse Snow angels                                        | Include legs simultaneously                                | Progress to pullover                   |
| Abdominals                       | Bird Dog variation (arms/legs separate)/dead bug variation | Progress to include simultaneous movements of limbs        | Longer hold                            |
| Average Fitness/Mobility Ability |                                                            |                                                            |                                        |

| Muscle Group                         | Starting Exercise                                                                          | Moderate Progression                                                        | High Progression                                                |
|--------------------------------------|--------------------------------------------------------------------------------------------|-----------------------------------------------------------------------------|-----------------------------------------------------------------|
| Quadriceps                           | Squat/wall squat (knee pain)                                                               | Add resistance (either with normal bands or thigh bands to activate glutes) | Lengthen rep time (count 3 down, 3 up)/pulse                    |
| Chest                                | Counter Push-Up (incline approximately 45)/chest fly (mod band)                            | Reduce incline (shorter surface)                                            | Lengthen rep time (count 3 down, 3 up)                          |
| Hamstrings                           | Resistance Tube Hamstring Curl/single-leg hip raise                                        | Add resistance/Lengthen rep time (count 3 down, 3 up)                       | Change surface of planted foot (e.g. foam, bosu, etc.)          |
| Upper Back                           | Standing Resistance Tube Row/Reverse Fly (mod band)                                        | Add resistance                                                              | Lengthen rep time (count 3 out, 3 in)                           |
| Mid/Low Back                         | Resistance Tube Lat Pullover                                                               | Add resistance                                                              | Lengthen rep time (count 3 out, 3 in)                           |
| Abdominals                           | Incline Plank/bird dog progressions (simultaneous legs/arms)/dead bug progressions         | Reduce incline towards horizontal)/banded bird dog/deadbug                  | Longer hold                                                     |
| <b>High Fitness/Mobility Ability</b> |                                                                                            |                                                                             |                                                                 |
| Muscle Group                         | Starting Exercise                                                                          | Moderate Progression                                                        | High Progression                                                |
| Quadriceps                           | Split Squat/lunges/walking lunges                                                          | Add resistance/change footing                                               | Lengthen rep time (count 3 down, 3 up)/pulse                    |
| Chest                                | Floor Push-Ups (from knees or feet)/chest fly (hard band)                                  | Lengthen rep time (count 3 down, 3 up)                                      | Add resistance band/change hand positioning                     |
| Hamstrings                           | Romanian deadlift                                                                          | Lengthen rep time (count 3 down, 3 up)/add resistance                       | Single Leg Romanian deadlift                                    |
| Upper Back                           | Standing single arm resistance tube row/single arm reverse fly (at reasonable resistance)  | Add resistance                                                              | Lengthen rep time (count 3 out, 3 in)                           |
| Mid/Low Back                         | Resistance Tube Lat Pulldown (high anchor, seated, kneeling, standing depending on set-up) | Add resistance                                                              | Lengthen rep time (count 3 out, 3 in), change arm position/grip |
| Abdominals                           | Forearm Plank/Hollow Hold                                                                  | Hand plank/lower legs                                                       | Dynamic plank                                                   |



1  
2  
3 **Aerobic Exercise.** The aerobic training portion will consist of 10-20 minutes of  
4 moderate intensity activity. Participants will be given one of two instructional, at home,  
5 exercise videos specifically designed for aerobic and cardiac fitness for older adults to  
6 complete via YouTube. Each video is approximately 15 minutes in length and  
7 participants will be encouraged to pause or slow down as needed; thus we expect the  
8 aerobic training to take approximately 20 minutes to complete. All participants will be  
9 monitored via video conferencing by a certified exercise physiologist while partaking in  
10 the YouTube home-based exercise. Participants will alternate between the following two  
11 videos in order to reduce boredom and maintain their interest.  
12  
13  
14  
15  
16  
17  
18  
19

20 *Video 1:* <https://www.youtube.com/watch?v=aVilzXtqi8c&t=167s>

21  
22  
23 *Video 2:* [https://www.youtube.com/watch?v=afvTMIT\\_ZTc](https://www.youtube.com/watch?v=afvTMIT_ZTc)

24  
25 French adaptations for Francophone participants are as follows:  
26  
27

28 *French Video 1:* [https://youtu.be/nk0LcCl\\_UJQ](https://youtu.be/nk0LcCl_UJQ)

29  
30  
31 *French Video 2:* <https://youtu.be/5MI5QWHc7II>

32  
33  
34 Intensity will be set using the talk-test, whereby participants state in short sentences  
35 and Ratings of Perceived Exertion (RPE; 4-6 on Borg's 10-point scale). This intensity  
36 score will allow us to individually tailor and modify exercises based on the participant's  
37 rating.  
38  
39  
40  
41

42 **Cool Down.** Each session will end with a five-minute cool down, which will consist of  
43 the following stretches (each held for 20-30 seconds); quadriceps stretch, hamstring  
44 stretch, calf stretch, 2 hip stretches, static torso rotation, seated side bend, back and  
45 shoulder stretch, chest stretch, triceps stretch, and neck stretch.  
46  
47  
48  
49

### 50 **7.2.2 Control Exercise Intervention: Balance and Toning (BAT)**

51 Participants assigned to the BAT control exercise condition will take part in home-based  
52 balance and toning exercises, while supervised by a trainer through the video  
53  
54

conferencing platform as outlined for the intervention exercise group.<sup>92-97</sup> The format of the control exercises including the duration of activities and the amount of coaching devoted will mirror that of the intervention condition. However, in the control condition, exercises will be devoted to improving muscle tone and flexibility, without improving strength, and cardiorespiratory capacity. Resistant load and number of repetitions will not progress across exercise sessions, unless participants were unable to complete required repetitions at the beginning of the intervention. All BAT sessions will include a simple stretching mat (rather than progressive resistance bands) that will be sent to participants at the study outset. For a general overview of the BAT program, please see Table 6 (below).

**Table 6.** General overview of control BAT regimen structure.

| Section                         | Type of Exercise                                        | Duration (min) |
|---------------------------------|---------------------------------------------------------|----------------|
| Warm Up                         | Marching in one place with arm swings for 1 minute      | 1              |
|                                 | Dynamic Hamstring Stretching: 15 per side               | 1              |
|                                 | Shoulder Circles: 15 per direction                      | 1              |
|                                 | 15 Arm Reaches                                          | 0.5            |
|                                 | Torso Twists: 15 per direction                          | 1              |
|                                 | Ankle Circles: 15 per direction per side                | 2              |
|                                 | Side Stepping for 1 minute                              | 1              |
|                                 | 15 Quarter Squats                                       | 1              |
|                                 | Total Warm Up Duration                                  | 8              |
| Break                           |                                                         | 1              |
| 7 Balance and Toning Activities | Standing with Feet Together + Tandem + Single Leg Stand | 10             |
|                                 | Core Contractions + Core & Arm Raises                   | 8              |
|                                 | Shoulder Retractions                                    | 3              |
|                                 | Isometric Quadriceps Strength                           | 3              |
|                                 | Seated Hamstring Curls                                  | 3              |
|                                 | Seated Arm Shake                                        | 3              |
|                                 | Total Balance and Toning Duration                       | 30             |
| Break                           |                                                         | 3              |
| Stretching Exercise             | Alternating Video for Participants                      | 15             |
|                                 | Total Stretching Duration                               | 15             |
| Break                           |                                                         | 3              |

| Section           | Type of Exercise          | Duration (min)   |
|-------------------|---------------------------|------------------|
| Cool Down         | Quadriceps Stretch        | 0.5              |
|                   | Hamstring Stretch         | 0.5              |
|                   | Calf Stretch              | 0.5              |
|                   | 2 Hip Stretches           | 0.5              |
|                   | Static Torso Rotation     | 0.5              |
|                   | Seated Side Bend          | 0.5              |
|                   | Back and Shoulder Stretch | 0.5              |
|                   | Chest Stretch             | 0.5              |
|                   | Triceps Stretch           | 0.5              |
|                   | Neck Stretch              | 0.5              |
|                   | Total Cool Down Duration  | 5                |
| <b>Total Time</b> |                           | <b>Approx 65</b> |

**Warm Up.** The session will start with the same 5-10-minute warm-up completed in the combined AE and RT group.

**Balance and Toning.** This will be followed by a variety of balance and toning exercises that will target the entire body. These activities are designed to match the intervention condition with respect to the time and duration—but they are not intended to physically challenge participants or progress in any way across the trial.

**Stretching.** Like the intervention condition, participants will alternate between two Youtube videos—but rather than an aerobic portion, the video will consist of a stretching session geared toward older adults. The following are the two videos that participants in the control condition will be presented with in alternating order.

*Video 1:* <https://www.youtube.com/watch?v=eHXbj2Uq8mM>

*Video 2:* <https://www.youtube.com/watch?v=zVCqkigsz4I>

**Cool Down.** All participants in the BAT condition will end with cool down stretching that is identical to the active intervention condition.

### 7.2.3 Cognitive Training: NEUROPEAK™

The cognitive training intervention will take place remotely using a tablet or computer-based multimodal and multi-domain dual-task training with memory load. Participants will be instructed on how to access the program from their home computer and will be asked to complete the cognitive training program called NEUROPEAK™ on their home computer prior to each exercise training session. Specifically, participants will be assisted by research staff in connecting to the platform from their home computer/tablet. The research assistant will connect with the participant via *Zoom for Healthcare*© in order to assist with the technical questions and offer technical assistance. NEUROPEAK™ has several cognitive training modules but for this study the custom-written program consists of a dual-task training program developed at University of Western Ontario for neurorehabilitation, which has been used in previous Canadian studies<sup>98-100</sup>. The cognitive training includes dual-task training that requires participants to maintain and prepare for many response alternatives (working memory) and to share attention between two concurrent tasks (divided attention). Difficulty of cognitive training is tailored to their individual functioning level. The training uses a custom-written program developed for neuro-rehabilitation and has been used in previous research trials for cognitive<sup>82,83</sup> and mobility outcomes<sup>39</sup>. Cognitive training will take 30 minutes at maximum to complete, and each participant will perform the cognitive training in their own home with no assistance for the cognitive training tasks, but will have the opportunity to ask for help on setting up the program or technical questions. The participant will be asked to do this training in a quiet room within their home to reduce any potential distractions.

During each cognitive training session, participants will perform one of two different visuo-motor tasks, which include sets of visual stimuli (e.g., letters, numbers, animals, vehicles, fruits, celestial bodies) and respective hand-button correspondences (i.e., keys that are to be tapped on either the right or the left side of the screen). Participants are instructed to perform these tasks as fast as possible, while maintaining accuracy. Tasks will be performed both separately and concurrently so that task-set cost and dual-task cost can be isolated, allowing us to determine the rate at which accuracy decreases

1  
2  
3 when task demands are high. At each session, task combination for the sets of stimuli  
4 will change (from a total 18 combinations). Training will also include online feedback as  
5 well as a histogram of daily performance (a simple graph showing progression but  
6 without specific numbers) to encourage improvement.  
7  
8  
9

#### 10 11 **7.2.4 Control Cognitive Training: Web Search and Video (WS+V)**

12 The cognitive training control home-based sessions will last a maximum of 20-25  
13 minutes to align with the same time frame as the cognitive training group. Participants  
14 will alternate between 2 different tasks (touristic searching using internet and video  
15 watching) completed using the same method as the intervention cognitive training (i.e.,  
16 on a computer within a quiet room in their home). In the first session, participants will  
17 receive a short introductory lesson on how to navigate the internet. For the touristic  
18 searching using internet, participants will be required to find 3 hotels, 3 touristic places,  
19 and 3 restaurants of their own preference in a city assigned by the instructor (a new city  
20 will be selected each session). They will also need to include the respective addresses  
21 of those places on their log sheet.  
22  
23  
24  
25  
26  
27  
28  
29  
30

31 For the video watching task, participants will watch a National Geographic video on  
32 YouTube selected by the instructor with a different video selected for each session.  
33 They will watch the video for 20 minutes and during the remaining 5 minutes they will  
34 answer the following questions on their log sheet: 1) What is the video about? 2) What  
35 is the most important information in your opinion? 3) Create a question based on the  
36 video and answer your own question. Regardless of whether or not participants have  
37 completed the above control cognitive training tasks, they will be stopped at 25 minutes.  
38  
39  
40  
41  
42  
43  
44

### 45 **7.3 RANDOMIZATION**

46 Upon completion of the baseline assessments (T0), participants will be randomly  
47 allocated to one of the four study arms (as shown in Figure 1). Randomization will be  
48 completed by Nellie Kamkar, the study Research Coordinator located at Lawson  
49 Research Health Institute in Parkwood Hospital, London Ontario, who will distribute  
50 randomization codes (using a random number generator) to determine the treatment  
51  
52  
53  
54  
55

1  
2  
3 arm to which each participant is allocated. Assessors and Research Assistants  
4 administering the interventions will be blinded and as such, only Nellie Kamkar and  
5 Andrew Sexton (the project manager at the University of New Brunswick) will have  
6 access to the randomization lists.  
7  
8  
9

### 10 11 **7.3.1 Method**

12 The randomization sequence of the participants will be generated centrally using a  
13 simple excel formula that generates a random number within a sequence. A block  
14 randomization by four will be applied to ensure an appropriate balance of the  
15 participants between each arm. Permuted blocks will be employed to ensure balance  
16 over time. This trial includes 4 possible treatment arms: 1) AE+RT and NEUROPEAK™;  
17 2) AE+RT and WS+V; 3) BAT and NEUROPEAK™; 4) BAT and WS+V. Simple  
18 randomization will not necessarily ensure that an equal number of participants will be  
19 allocated to each group (for example, we may randomly have a large proportion of  
20 participants in one group and very few or none in another). Block randomization  
21 ensures that this does not occur. Every four participants will be put into a block. For  
22 example, the first block (Block A), will consist of our first participant whose treatment  
23 arm allocation will be determined using a random number ranging from 1 to 4 (each  
24 representing the respective arms listed). Let's assume that this number happened to be  
25 3 (BAT and NEUROPEAK™). Then, for the next participant in the block, a random  
26 number ranging from 1 to 3 will be generated (with all treatment arms *except* the BAT  
27 and NEUROPEAK™). Now, the number 1 represents AE+RT and NEUROPEAK™ (like  
28 before), the number 2 represents AE+RT and WS+V (also like before). But the number  
29 3 represents BAT and WS+V (what used to be arm 4). This ensures that the second  
30 participant will be randomly allocated to a different arm than the first participant. The  
31 third participant in Block A will be randomly assigned to one of the two remaining arms  
32 and the fourth participant will be assigned to the last remaining arm.  
33  
34  
35  
36  
37  
38  
39  
40  
41  
42  
43  
44  
45  
46  
47  
48  
49

### 50 51 **7.3.2 Procedure**

52 Each participant will have an allocated sequential randomization number. After the  
53 baseline assessment, the SYNERGIC@Home Research Coordinator at UNB (not  
54

involved in measurement or intervention) will access the randomization list to determine the arm allocation for the participant. The Research Coordinator will maintain a separate file stored in SharePoint (accessible only by the Coordinators and PI's) that links the participant's ID with their treatment group allocation.

## 7.4 BLINDING

In order to minimize a source of bias, this is a double-blinded study. Research personnel performing the outcome assessments will be blinded to group allocation. Participants will be blinded to the intervention received and study hypotheses.

### 7.4.1 Maintaining Blinding

Only the designated Research Assistants (RAs) delivering the interventions will know the treatment group that participants belong to. As part of the training for RAs during onboarding (in our trial SoP), they will be informed of the importance of blinding and instructed to avoid conversing with participants in a way that could reveal their group membership.

Participants will be informed at consent and reminded at enrollment of the importance of blinding and that they should refrain from discussing their treatment program with friends and family and especially with others they may know that are participating in the study.

### 7.4.2 Unblinding

If it is medically necessary to un-blind a participant during the trial, the RA assigned to doing the assessments or interventions will contact the study Physician and Principal Investigators to discuss the reason for the code to be broken. If it is deemed relevant to unblind the participant the study Physician will contact the Research Coordinator to break the blinding. The participant will then withdraw from the study.

### 7.4.3 Debriefing

At the end of the trial (immediately after participants complete their T10 assessment), participants will be unblinded such that a research assistant divulges the exact condition

1  
2  
3 that the participant was randomly allocated to. During this debriefing session,  
4 participants will have an opportunity to ask questions and to give feedback.  
5  
6

## 7 7.5 EARLY WITHDRAWAL

8  
9  
10 Participants will be withdrawn from the study if they no longer wish to continue their  
11 participation. Participants who voluntarily withdraw will be asked if they would be willing  
12 to continue their participation in either intervention on its own. For example, a participant  
13 who indicates that s/he would like to withdraw due to lack of satisfaction with the  
14 exercise intervention will subsequently be asked if s/he would be willing to continue with  
15 the cognitive training intervention on its own. Participants will be withdrawn if, in the  
16 opinion of one of the study physicians, it is medically necessary to do so.  
17  
18  
19  
20  
21  
22

23 Participants will be asked to complete a 20-item exit questionnaire (see Appendix D)  
24 where the purpose is to collect information about their experiences with the study  
25 circumstances and logistics. These findings will provide useful information about trial  
26 feasibility. Participants who withdraw from the study and agree to provide this feedback  
27 will be emailed a copy of the questionnaire for completion through SurveyMonkey. The  
28 completed questionnaire will either be scanned and returned by email or a hard copy  
29 will be mailed to the research coordinator using a stamped, self-addressed envelope we  
30 provide.  
31  
32  
33  
34  
35  
36  
37

## 38 7.6 MIXED METHODS DESIGN: EXPERIENCE OF STUDY PARTICIPANTS

39  
40 One of the secondary feasibility objectives as described at the outset aims to measure  
41 the experience of study participants who have participated in this intervention trial being  
42 conducted in home-based, on-line settings using *Zoom for Healthcare*®. Using key  
43 concepts such as satisfaction, knowledge gained, motivation/commitment, adherence,  
44 and benefits, and challenges, we will collect data about the feasibility of conducting a  
45 home-based, on-line intervention trial with an older, community-dwelling population.  
46  
47  
48  
49  
50  
51  
52  
53  
54



### 7.6.1 Mixed Methods Design

An explanatory sequential mixed methods design will be used<sup>101</sup> where qualitative data will be collected to explore quantitative findings. This design is implemented in two phases where initially data collected using a quantitative instrument in the first phase is followed by a qualitative phase. Using mixed methods enables the quantitative results to be “sequentially” explored in more detail through this phase two qualitative approach.

A questionnaire (Appendix D) will be administered to the 64 study participants upon completion of the study intervention (T4). Semi-structured interviews will be conducted with study participants using the guide in Appendix E following the completion of their six month post-intervention follow-up assessment (T10).

### 7.6.2 Data Collection Instruments

Questions developed for both the quantitative and qualitative instruments were constructed using Kirkpatrick’s (1975) framework—a four-level model that has been used to assess participants’ benefits and experiences with different types of programs<sup>4</sup>. This framework consists of four dimensions as illustrated in Table 7 and has been used in numerous settings to conduct a process-focused program evaluation.

**Table 7.** Kirkpatrick’s Framework for Evaluation of Participant Experience

| <b>Kirkpatrick’s Framework for Evaluation</b>                               |                                                                                                                                                                                                                                                                                                                                                        |
|-----------------------------------------------------------------------------|--------------------------------------------------------------------------------------------------------------------------------------------------------------------------------------------------------------------------------------------------------------------------------------------------------------------------------------------------------|
| <b>Dimension</b>                                                            | <b>Possible Areas for Exploration</b>                                                                                                                                                                                                                                                                                                                  |
| <b>Reaction</b> (to research study)                                         | <ul style="list-style-type: none"> <li>• How did participants feel about components of the study?</li> <li>• Were participants satisfied with the research team members implementing the intervention(s)?</li> </ul>                                                                                                                                   |
| <b>Learning</b> (new knowledge / skills; what knowledge / skills unlearned) | <ul style="list-style-type: none"> <li>• What new knowledge and skills were learned? Any new knowledge about how to improve thinking and memory?</li> <li>• Did participants become aware of new evidence-informed practices that required them to ‘unlearn’ skills? For example, was there new learning with respect to physical exercise?</li> </ul> |

| <b>Kirkpatrick's Framework for Evaluation</b>                                             |                                                                                                                                                                                                                                                |
|-------------------------------------------------------------------------------------------|------------------------------------------------------------------------------------------------------------------------------------------------------------------------------------------------------------------------------------------------|
| <b>Dimension</b>                                                                          | <b>Possible Areas for Exploration</b>                                                                                                                                                                                                          |
| <b>Behaviour</b> (change in behaviour as a result of participating in the research study) | <ul style="list-style-type: none"> <li>• What does the participant identify as changes in behaviours as a result of participating in the study?</li> <li>• What new skills were learned?</li> <li>• What were motivators to change?</li> </ul> |
| <b>Results</b> (Measurable outcomes)                                                      | <ul style="list-style-type: none"> <li>• Benefits identified by participants</li> </ul>                                                                                                                                                        |

### 7.6.3 Participant Exit Questionnaire

The purpose of using a quantitative instrument (Appendix D) is to obtain a snapshot of the study circumstances and logistics from the participants' perspective. Upon completing the study intervention (at T4) each participant will be sent a one-page, short-form questionnaire via email. This questionnaire consists of 19 closed-ended questions using a 5 point Likert scale and one open-ended question. The questions consist of alternating positive and negative statements which collect participants' impressions about their experience and satisfaction with various elements of this study; i.e., such as using a computer or video-conferencing to complete the intervention and assessments. Study participants will either return the scanned questionnaire by email or mail a completed hard copy to the research coordinator using a stamped, self-addressed envelope.

#### 7.6.3.1 Quantitative Data Analysis

The results of these questionnaires will be analyzed using a standard statistics software program such as SPSS. Descriptive statistics for the anonymized questionnaires will be compiled such as the number of responses, the percentages for each question, and the group mean and standard deviation.

### 7.6.4 Participant Semi-Structured Interview

A semi-structured interview guide has been developed (Appendix E) consisting of question that ask participants to comment on their study experiences. For example, the

1  
2  
3 benefits of this research approach for exercise and cognitive training programs including  
4 their reaction to the type of training they completed, their user satisfaction, the ease of  
5 participation in a virtual setting, the quality of information received; and support provided  
6 by research team members and the extent of burden and fatigued from completing the  
7 assessments will be explored.  
8  
9  
10  
11  
12

#### 13 **7.6.4.1 Qualitative Data Analysis**

14  
15 Transcribed data from the interviews will be uploaded into NVivo, a qualitative software  
16 program used for data analysis by the team's qualitative researchers. Transcripts will be  
17 divided amongst the qualitative researchers. These team members will code the  
18 interview data, initially independently, and then meet as a group to arrive at a  
19 consensus of codes. Following coding of the data, through thematic analysis, themes  
20 and sub-themes will be generated to identify participants' perspectives of the feasibility,  
21 experience and satisfaction with this type of virtually delivered study. Study participants  
22 will be invited to review and validate the themes generated; this validation adds rigor to  
23 analysis, which ensures that the researchers "got it right".  
24  
25  
26  
27  
28  
29  
30  
31

#### 32 **7.6.5 Triangulation**

33 The mixed methods design promotes methodical rigor. For this aspect of the study,  
34 triangulation of the findings takes place from two perspectives. Collecting both  
35 quantitative and qualitative data gives more insight than any one method will provide. In  
36 addition, having more than one member of the research team conduct the semi-  
37 structured interviews can significantly enhance the credibility of the findings and is  
38 particularly important for decreasing bias in gathering, analyzing data and/or reporting  
39 study findings.  
40  
41  
42  
43  
44  
45  
46

### 47 **7.7 COMPENSATION**

48  
49 In recognition for the participant's time commitment they will be given \$50.00 after the  
50 immediate post-intervention follow-up (T4) assessment and \$50.00 the 6-month post-  
51 intervention follow-up (T10), for a total amount of \$100. Compensation will be in the  
52 form of gift cards to local grocers (Sobeys and Atlantic Superstore) and gas stations  
53  
54  
55

(Irving Circle K and Ultramar) of the individual's choice, or equivalent cash value paid by cheque.

## 8. STATISTICAL CONSIDERATIONS

### 8.1 SAMPLE SIZE AND POWER ANALYSIS

A total of 64 participants will be enrolled in the SYNERGIC@Home study. Participants will be randomly allocated to each of the four arms with 16 participants per arm. Power analysis was calculated a-priori using G\*Power 3.1 based on our primary analytic goal of assessing the relationship between intervention preference and subsequent adherence. Specifically, we plan on examining correlations among continuous variables with a final total sample size needed of 48 (25% loss) and with one-tailed analyses at  $\alpha = .05$  for two correlation tests (equivalent to a two-tailed test at  $\alpha = .1$ ), thus we will have 96% power to detect a moderate to large effect size (of .5 or larger) and 82% power to detect an effect size of .4 or larger. For any  $r$  greater than .6, power will be well over 99%, meaning that we will have greater than 99% power to explain a minimum of 36% of the variability in our dependent variable.

### 8.2 PLANNED DATA ANALYSIS

Descriptive statistics for demographic and baseline characteristics will be provided with means and standard deviations, or medians and the interquartile range where appropriate, for continuous characteristics, and frequencies and percentages for categorical variables. Analysis will be conducted as intention-to-treat (ITT) and as per-protocol analysis (PPA).

#### 8.2.1 Primary Feasibility Outcomes

Adherence to the interventions will be analyzed using a one-sample t-test that will test the hypothesis that participants complete at least 36 of the 48 (75%) scheduled

1  
2  
3 interventions sessions. This test will be used to determine if the adherence is similar to  
4 hypothesize, better than hypothesized or worse than hypothesized.  
5  
6

### 8 9 **8.2.2 Secondary Feasibility Outcomes**

10 Enrollment recruitment target of 75% will be tested using a Chi-square goodness-of-fit  
11 test ( $\alpha=.05$ ) of actual distribution (# eligible and # screen fails) versus hypothesized  
12 distribution (75% and 25% of N). This test will be used to determine if the achieved  
13 distribution of eligible participants is similar to that hypothesized, significantly better than  
14 that hypothesized, or significantly lower than that hypothesized.  
15  
16  
17

18  
19 To answer the research questions pertaining to trial retention, we will examine  
20 proportions reaching our 75% enrollment retention target at the immediate post-  
21 intervention follow-up (T4) assessment and the 75% follow-up retention target at the 6-  
22 month post-intervention follow-up (T10) assessment with 95% confidence intervals  
23 (when possible). In addition, Chi-square good-of-fit test will also be used to quantify the  
24 significance of the difference between the observed and hypothesized proportions.  
25  
26  
27  
28

29  
30 Assessment tolerability will use descriptive statistics (counts) to describe how many and  
31 under what circumstances (documented in CRF notes) that participants decided to drop  
32 out of the trial, not because of the interventions, but because of the extensive battery of  
33 testing they must undergo in order to start the trial.  
34  
35  
36  
37

38  
39 Descriptive statistics will be used to analyze the quantitative Exit survey to determine  
40 where on the spectrum of satisfaction (completely unsatisfied to completely satisfied)  
41 participants fall in terms of the trial components (see Appendix D). Data will be analyzed  
42 using a two-way ANOVA on exercise intervention (active and control) and cognitive  
43 intervention (active and control) to determine if there is a significant interaction effect  
44 induced by the combined active treatments.  
45  
46  
47  
48

49  
50 Adverse events will be analyzed using a Chi-square cross-tabulation analysis between  
51 AE severity and AE relation-to-trial. We will use this analysis to test the hypothesis that  
52 there is a relationship between AE severity and being in the trial. Furthermore, we will  
53  
54

1  
2  
3 stratify the sample by treatment arm and use a Chi-square goodness-of-fit test to  
4 determine if AEs are distributed differently across treatment arms against the null  
5 hypothesis of an even distribution (no relation to treatment arm).  
6  
7

### 8.2.3 Primary Analytic Outcomes

11 For primary analytic outcomes examining the relationship between interest level in and  
12 adherence to the interventions, we will correlate interest level (responses given on the  
13 Intervention Preference Questionnaire, See Appendix A) for each intervention with  
14 adherence rates calculated from trial logs, using Pearson's r. This analysis will tell us if  
15 adherence to the trial is related to participants' affinity for any one or more interventions.  
16  
17  
18  
19  
20

- 21 • **Interest in the Interventions:** Question 1 on the survey rates their interest in  
22 each intervention independently, **INT\_EX** and **INT\_CT**, on a 0-10 scale.
- 23 • **Intervention Preference:** The second question rates their relative preference for  
24 either intervention. This will generate a single variable that gives the relative  
25 preference (-2 to 2 scale), **PR**, where low scores prefer exercise and high scores  
26 prefer cognitive training. Because we will administer preference survey at  
27 baseline and then at 4mo, we will have two measures **PR1** and **PR2**. The  
28 difference scores (**dPR=PR2-PR1**) would be negative if their preference moved  
29 toward exercise, and positive if it moved toward cognitive training.
- 30 • **Intervention Allocated:** The treatment arms can be represented by two dummy  
31 (0,1) variables **EX\_ARM** and **CT\_ARM**.
- 32 • **Adherence to Interventions:** Adherence to the interventions at the end of the  
33 trial, **AD\_EX** and **AD\_CT**, is a continuous scale variable (% exercise and  
34 cognitive training sessions attended, respectively).  
35  
36  
37  
38  
39  
40  
41  
42  
43  
44  
45  
46  
47

#### 8.2.3.1 Analysis Plan

48 ***What is the Relationship between Adherence and Intervention Interest?*** For each  
49 of the two interventions we will calculate the Pearson correlation coefficient ( $\rho_{X,Y}$ ) with a  
50 one-tailed alpha of .05.  
51  
52  
53  
54

H0:  $\rho_{X,Y} = 0$ , H1:  $\rho_{X,Y} > 0$ , where X=INT\_EX and Y=AD

H0:  $\rho_{X,Y} = 0$ , H1:  $\rho_{X,Y} > 0$ , where X=INT\_CT and Y=AD

Rejection of the null hypothesis for either test will allow us to conclude that interest level in the intervention type prior to the trial explains a significant amount of variance in adherence to the trial. Failure to reject the null hypothesis would suggest that prior attitudes about the interventions does not influence how well they adhere to the interventions.

### 8.2.3.2 Other Analyses

***Which intervention type (physical exercise or cognitive training) do the majority of participants prefer over the other?*** To answer this question we will use a single-sample t-test to test if the mean PR is directionally biased from the middle score (no preference).

***What proportion of participants have no particular preference for either intervention?*** To answer this question we will compute the proportion of participants that selected “Equal preference” response.

***Do their attitudes change after completing the active interventions versus the control interventions?*** To answer this question we will calculate the mean preference change dPR and test whether it is different from zero using a single-sample t-test.

***Do participants adhere better if they receive the active treatments they prefer?***

Because some participants will be randomly assigned to the active intervention that matches their preference and others will not (will get the control version of the intervention), we will transform the preference score into a logical variable PR\_MET (1=preference met, 0=preference not met).

if (PR1<3 and EX\_ARM=1) or (PR1>3 and CT\_ARM=1),

then **PR\_MET**= 1, else **PR\_MET**=0

We will test the hypothesis that

$H_0: \rho_{X,Y} = 0$ ,  $H_1: \rho_{X,Y} \neq 0$ , where  $X=\mathbf{PR\_MET}$  and  $Y=\mathbf{AD}$

Rejection of the null hypothesis ( $p < .05$ ) will allow us to conclude that adherence to the interventions is significantly influenced by receiving the active intervention they prefer.

### 8.2.4 Secondary Analytic Outcomes

Clinical and activity assessments will yield a rich source of information for quantifying effect sizes of trial outcomes. We will calculate Cohen's d effect sizes (mean difference/standard deviation) for cognitive, mobility and lifestyle outcomes (e.g., diet and sleep) listed in Table 2.

All statistical tests will be two-tailed, and a p-value of less than 0.05 will be considered to indicate statistical significance. All calculations will be made using the Statistical Package for the Social Sciences (SPSS version 23.0, SPSS Inc., Chicago, IL) and Stata (Stata Statistical Software: Release 14. College Station, TX: StataCorp LP.).

### 8.3 FREQUENCY OF THE DATA ANALYSES

Preliminary analysis will be performed after finishing recruitment to ascertain descriptive characteristics at baseline assessment. Interim efficacy analyses will be performed when recruitment is reaching 50% of target sample ( $N = 32$ ) and final efficacy analysis will be performed at the end of the trial ( $N = 64$ , but 48 are need for final analyses), as no safety issues are anticipated in this study.



## 9. ADVERSE EVENTS

### 9.1 DEFINITIONS

#### 9.1.1 Adverse Event (AE)

An adverse event (AE) is any untoward medical occurrence in a subject that may present itself during the conduct of a research study and which may or may not have a causal relationship with the study procedures. An AE can therefore be any unfavourable or unintended sign (e.g., including an abnormal laboratory finding), symptom, or disease temporally associated with a study procedure. An AE may be a new illness, worsening of a sign or symptom of a condition, or an effect from a study procedure.

#### 9.1.2 Serious Adverse Event (SAE)

A serious adverse event (SAE) is any untoward medical occurrence that:

- Results in death
- Is life-threatening, i.e., the subject was at immediate risk of death at the time of the event; it does not include any event which hypothetically might have caused death if it had occurred in a more severe form.
- Requires inpatient hospitalization or prolongation of existing hospitalization. Hospitalizations and/or surgical procedures that are scheduled to occur during the study period, for an illness or disease that existed before subject enrolment in the trial, will not be considered AEs provided the pre-existing condition did not deteriorate (e.g., surgery performed earlier than the planned date).
- Results in persistent or significant disability/incapacity

Medical and scientific judgement should be exercised in deciding whether expedited reporting is appropriate. In other situations, such as important medical events that may not be immediately life-threatening or result in death or hospitalization but may jeopardize the subject or may require intervention to prevent one of the other outcomes listed in the definition above. These should also usually be considered serious.

## 9.2 CLASSIFICATION

### 9.2.1 Severity

Adverse events will be classified as mild, moderate or severe in severity as follows:

- **Mild:** Discomfort noticed but no disruption of normal daily activity.
- **Moderate:** Discomfort sufficient to reduce or affect normal daily activity.
- **Severe:** Incapacitating with inability to work or perform normal daily activity.

The term “severe” is often used to describe the intensity (severity) of a specific event (as in mild, moderate, or severe myocardial infarction); the event itself, however, may be of relative minor medical significance (such as severe headache). This is not the same as “serious”, which is based on subject/event outcome or action criteria usually associated with events that pose a threat to a subject’s life or functioning. Seriousness (not severity) serves as a guide for defining regulatory reporting obligations.

### 9.2.2 Attribution

The relationship of the AE to study procedure will be assessed by the investigator to be not related, unlikely, possible, probable or definite, as follows:

- **Not related:** No relationship between the AE and the study procedure, judged clearly and incontrovertibly due to extraneous causes such as concomitant medication(s) or the subject’s clinical state.
- **Unlikely:** The AE is more likely due to an alternative explanation such as concomitant medication(s), concomitant disease(s) and/or the time relationship suggests that a causal relationship is unlikely.
- **Possible:** The AE might be due to a study procedure. An alternative explanation such as concomitant medication(s), concomitant disease(s) is inconclusive. The time relationship is reasonable therefore the causal relationship cannot be excluded.

- **Probable:** The AE might be due to a study procedure. An alternative explanation such as concomitant medication(s), concomitant disease(s) is less likely. The time relationship is suggestive, i.e. it is confirmed by de-challenge.
- **Definite:** The AE cannot be reasonably explained by an alternative explanation such as concomitant medication(s), concomitant disease(s). The time relationship is very suggestive, i.e. it is confirmed by de-challenge and re-challenge.

For the purposes of safety analyses, all SAEs classified with a relationship to a study procedure of possible, probable or definite will be considered study-related events.

### 9.3 PROCEDURES FOR AE AND SAE REPORTING

#### 9.3.1 Adverse Event (AE) Reporting

All AEs experienced by the subject between the signing of the Informed Consent and discontinuation of the study will be reported. All AEs must be recorded in the CRF. For both serious and non-serious AEs, the investigator must determine both the intensity of the event and the relationship of the event to study procedures.

#### 9.3.2 Serious Adverse Event (SAE) Reporting

All SAEs will be recorded in the CRF starting from the time of the signing of the Informed Consent up to and including the end of study. All SAEs, regardless of the relationship to study procedures, must be reported within one working day of site personnel being notified of the occurrence of the event.

SAE forms will be provided to each study site. The initial SAE report should include at a minimum: subject number, a narrative description of the event, and an assessment by the investigator of the intensity of the event and relationship of the event to study drug. The initial SAE report received from the site should be complete as soon as possible. A complete follow-up SAE report must be submitted when the information, not available at the time of the initial report, becomes available. The sponsor (or designee) may request SAE follow-up information.

1  
2  
3 Any SAE that occurs at any time after completion of the study, which the investigator  
4 considers to be related to study procedures, must be recorded in the CRF.  
5  
6

7  
8 All SAE will be submitted to the REB.  
9

### 10 **9.3.3 Period of Observation**

11 All AEs should be monitored to determine the outcome or until the investigator  
12 considers it medically justifiable to terminate follow-up.  
13  
14

15  
16  
17 All SAEs should be monitored until resolved or until the SAE is clearly determined to be  
18 due to a subject's stable or chronic condition or intercurrent illness(es).  
19  
20

## 21 **10. ETHICAL AND OPERATIONAL CONSIDERATIONS**

22  
23  
24  
25 This study is conducted in compliance with International Conference on Harmonization  
26 Good Clinical Practice (ICH-GCP) and all applicable regulatory requirements. This  
27 SYNERGIC@Home study will undergo review and approval from the Research Ethics  
28 Committees/Boards of Vitalité Health Network In Moncton, New Brunswick, Horizon  
29 Health Network in Fredericton, New Brunswick, the University of New Brunswick in  
30 Fredericton New Brunswick, and Université de Moncton in Moncton, New Brunswick.  
31  
32  
33  
34  
35

### 36 **10.1 ETHICAL CONSIDERATIONS**

#### 37 **10.1.1 Informed Consent**

38  
39 When potential participants have self-identified as being interested in learning more  
40 about the study to decide if they want to participate, the Clinical Research  
41 Coordinator/Nurse will contact the individual to discuss an overview of the study. If they  
42 are interested in pursuing more information the informed consent will be emailed or  
43 mailed to them for their review. Potential participants will be given a copy of the  
44 informed consent form in their language of choice.  
45  
46  
47  
48  
49  
50

51  
52 After the potential participant agrees to be considered for recruitment the clinical  
53 research coordinator/nurse will arrange a time for a more detailed videoconference  
54  
55

1  
2  
3 meeting for the Screening Visit. Opportunity for discussion of the study and Informed  
4 consent will be provided and all questions will be answered. The informed consent will  
5 be completed and signed prior to beginning any study related assessments/procedures.  
6  
7 Signing of the consent will be done via videoconference and then returned by mail using  
8  
9 a stamped, self-addressed envelope to the clinical research coordinator/nurse who will  
10 then sign it and file the original with the participant research documents. A final signed  
11  
12 copy of the informed consent will be provided to the participant either by email or mail  
13  
14 depending on their choice.  
15  
16

### 17 18 **10.1.2 Confidentiality and Privacy**

19  
20 Participants' private and identifiable information will be held in strict confidence and will  
21 not be shared outside the research team, with the exception of enforcement of  
22  
23 applicable civil or federal laws. Research team members will only have access to  
24  
25 private and identifiable information on a need-to-know basis or as necessary for  
26  
27 carrying out their study tasks.  
28

29  
30 Due to the COVID-19 pandemic, many research team members will be working from a  
31 home environment. All RAs involved in assessing or delivering interventions to study  
32 participants will be provided a secure UNB laptop administered by the study Project  
33  
34 Manager. The study laptop may only be used for study related activities and must be  
35  
36 used for all videoconferencing activity and data storage. All research coordinators in the  
37  
38 Health Network will be working within their institutions or from a home environment.  
39  
40 They will be provided a secure Health authority laptop administered by Service New  
41  
42 Brunswick. All connection will be protected behind the institution firewall. Research  
43  
44 team members and investigators will be prohibited from discussing participant cases or  
45  
46 sharing of private and identifiable information by email or non-secure  
47  
48 videoconferencing.  
49

### 50 51 **10.1.3 Biospecimen Collection Privacy**

52  
53 To ensure participant privacy and confidentiality in biospecimen collection, storage,  
54  
55 shipment, participants will be instructed to print their study ID number on their saliva  
56  
57

1  
2  
3 sample box (rather than their name) and to ensure that their name or any personally  
4 identifiable information is *not* indicated on their sample box. They will be given mailing  
5 materials to pack their sample in and will be given instructions on how to mail the  
6 sample back for analysis. This is in accordance with standard operating procedures for  
7 storing, shipping, and handling of bio-samples for research purposes.  
8  
9  
10  
11  
12

## 13 **10.2 STUDY SAFETY AND MONITORING COMMITTEE**

14  
15 There will be a Study Safety and Monitoring Committee that will consist of all NB-PALM  
16 principal investigators and site physicians, project manager and research coordinator(s),  
17 as well as a physician not associated with the study (TBD) and a community member  
18 (TBD). This committee will be responsible to receive all reports of AEs and SAEs  
19 reported for any participant as well as to monitor the overall operations of the entire  
20 research project. A log of these reports will be kept and reviewed regularly to monitor  
21 the safety of the clinical trial.  
22  
23  
24  
25  
26  
27

## 28 **10.3 RISK MANAGEMENT AND SAFETY MONITORING PLAN**

29  
30 All participants will be monitored by trained research staff, and should any adverse  
31 events arise, the research team directly working with the participant will notify the  
32 Clinical Research Coordinator/Nurse, who will gather and document the appropriate  
33 information and will contact the Physician Principal Investigator and/or Study Physician.  
34 Adverse events will be documented as described above in Section 10.  
35  
36  
37  
38  
39  
40

41 Participants will be given a phone number and e-mail address to contact if there is an  
42 adverse event, or they may report AEs at the start of their training session with the RAs  
43 delivering their interventions. There will be a member from the research team available  
44 to assist with this Monday to Friday 0800-1600 (excluding statutory holidays). All  
45 participants will be encouraged to use the contact information provided to them to ask  
46 any non-urgent questions and address their concerns throughout the entirety of the  
47 study trial.  
48  
49  
50  
51  
52  
53  
54

1  
2  
3 In order to ensure that participant safety is the utmost focus of the research project, we  
4 have put forth the following plan and answered the following risk management and  
5 safety monitoring questions:  
6  
7

### 8 9 **10.3.1 Safety Monitoring**

10 Participant safety will be regularly monitored during each assessment and intervention  
11 session using an ongoing paper log. This log will be filled out by the study assessor  
12 conducting the intervention session and she/he will insert detailed session notes  
13 pertaining to the events that transpired during each event. This log will be reviewed by  
14 the clinical research coordinator/nurse and if there are any concerns it will be reported  
15 to the physician principal investigator and/study physician. These will be reported to the  
16 Safety and Monitoring Committee on a monthly basis.  
17  
18  
19  
20  
21  
22  
23

### 24 **10.3.2 Withdrawal for Safety Reasons**

25 During their intervention sessions which occur three times per week, participants will be  
26 monitored the Research Assistant administering the intervention. Any concerns that are  
27 medical in nature will be communicated to the Clinical Research Coordinator/nurse.  
28 Further information will be collected from the patient by the nurse and the physician  
29 principal investigator/study physician will be notified. Follow up on any medical matters  
30 will be done by the nurse and/or physician as required. If further medical care is needed  
31 the participant will be referred to their primary care physician/provider for follow up. A  
32 decision regarding early withdrawal from the study will be made by the principal  
33 investigator/study physician and all the appropriate document will be completed.  
34  
35  
36  
37  
38  
39  
40  
41  
42

### 43 **10.3.3 Study-wide Stopping Rules**

44 In light of the fact that this intervention program has been implemented previously in the  
45 SYNERGIC trial, it is unlikely that this study would be required to stop early due to  
46 safety concerns. However, SYNERGIC@Home will be conducted remotely so it is  
47 possible that adverse events may arise that are not anticipated requiring the entire  
48 study to stop. The decision to stop the study early will rest with Study Safety and  
49 Monitoring Committee.  
50  
51  
52  
53  
54

## 10.4 INCIDENTAL FINDINGS

Incidental findings include any previously undiagnosed medical finding observed throughout the trial, identified purely accidentally within the research trial. Any incidental findings observed throughout the trial will be addressed by the Clinical Research Coordinators/Nurse and Physician Principal Investigator/Study Physician. All incidental findings will be appropriately documented. Depending on the finding the participants' primary care physician/provider will be contacted so that appropriate follow up and care if necessary is received. All findings and their follow-up actions will be documented and monitored until it has been resolved or as long as the participant remains in the study.

## 10.5 PROTOCOL DEVIATIONS

A protocol deviation occurs when the activities of the study deviate from that which is detailed in the study protocol. All research staff will make it their priority to ensure that the protocol is abided by as closely as possible. However, in the event that a participant deviates from the protocol, a protocol deviation form (see Appendix I) will be filed and details pertaining to the deviation will be noted in a hard copy stored in locked cabinets on the UNB campus. Attempts will be made to return to study procedure as outlined in the protocol as much as possible and as swiftly as possible.

## 10.6 DATA MANAGEMENT AND STORAGE

### 10.6.1 Primary Source Data

Primary source data will be stored using SharePoint, a secure platform through the University of New Brunswick to which only designated research staff have access. Primary source data are defined as the copies of the original hard copy assessment forms completed by the research team member conducting the assessments along with any hard copy self-report questionnaires and other study document sent by a participant of collected by the site research coordinators. Hard copies of any data collection forms will be stored in locked cabinets located at the workplaces of study research staff and accessible only by study staff.



### 10.6.2 Secondary Source Data

Upon completion of the study, all data collected in paper form with the unique identification numbers will be uploaded to the Longitudinal Online Research and Imaging System (LORIS) system (<https://ccna.loris.ca/>) at the McGill Centre for Integrative Neuroscience, McGill University, Montreal, Quebec. The LORIS is an OPEN SOURCE toolset framework for storing and processing behavioural, clinical, neuroimaging and genetic data. LORIS is designed to simplify management of large datasets acquired over time in a longitudinal study, and at different locations in a multi-site study. It provides a secure web-based access to data validation and quality control modules, as well as visualization and basic statistical tools. The LORIS servers in which the data is stored are physically located on the McGill University campus, in a secure data facility. Study staff will enter data into LORIS via web-portal.

### 10.6.3 Video and Audio Recording

All study procedures including intervention sessions (physical activity and cognitive training) will occur via Video Conferencing using *Zoom for Healthcare*®. The screening and baseline (T0), immediate post-intervention follow-up (T4), and 6-month post-intervention follow-up (T10) assessments will be video and audio recorded. In addition, a subset of 3 intervention sessions will be selected to be video recorded per participant for quality control. Anytime during which participants will be video recorded, they will be told ahead of time that their session will be video recorded.

The audio and video recordings will only be accessed by members of the research team to verify the data that is needed for populating the assessment forms. Once scores are verified from video and audio recordings, they will be transferred to the Case Report Forms and data will be input into a data collection sheet (Appendix F) for input to LORIS as described in section 11.6.2. Data will only be linked to each study participant's unique study identification number. The audio and video recordings, will be stored at UNB on a secure Sharepoint server and discarded after the data has been transferred. Recordings will never be shared, uploaded or distributed to any individuals or organizations outside of the research team. Data obtained from the ActiGraph GT9X

1  
2  
3 devices (i.e., gait parameters, heart rate, and sleep cycle data) will also be stored at  
4 UNB on a secure Sharepoint server and discarded after it has been transferred.  
5  
6

7  
8 Participant names will not be associated with their video recording and participants will  
9 be asked to set their *Zoom for Healthcare*® user password as their initials. Video and  
10 audio recordings will be discarded after their data has been extracted.  
11  
12

### 13 14 **10.7 FUTURE USE OF STORED SPECIMENS AND DATA**

15  
16 Biological samples will be stored at the Clinical Genomics Centre in the Mount Sinai  
17 Hospital, 600 University Ave, Toronto, ON M5G 1X5, Canada and will be processed  
18 under the guidance of Dr. Kathy Siminovitch. Approximately half of the samples will be  
19 used for planned analyses (polygenic hazard score (PHS) testing). The rest may be  
20 available for investigators who wish to perform further analyses on the whole cohort or a  
21 subset. Participants will be asked if they are willing to be contacted at a later date to be  
22 asked whether or not they consent to have their sample biobanked for future research  
23 use. Only participants who consent being contacted at the later date, and then consent  
24 to biobanking their sample for future studies will have their sample analyzed for other  
25 purposes, the samples from patients who didn't agree for this biobanking will be  
26 destroyed. Access to these samples will be regulated by the Biological Sample Access  
27 Committee which is made up of members of CCNA (members list available on request).  
28 Requests for access will be assessed for feasibility, scientific rigour, and alignment with  
29 the consent of the participants. In order to be granted access to samples, investigators  
30 must agree that the data they generate from the samples will be included in the larger  
31 CCNA database on LORIS within 2 years of sample batch receipt. Samples will be  
32 shared within Canada only for a period of 3 years after the last sample has been  
33 collected. After that 3-year period, they will be available to international researchers, if  
34 not already depleted. The full Biological Sample Access policy document is under  
35 development and will be made available upon its finalization.  
36  
37  
38  
39  
40  
41  
42  
43  
44  
45  
46  
47  
48  
49  
50

51  
52 PHS testing is still in its early embryonic stages in terms of clinical development and  
53 while it holds great promise for clinical utility in the future, it is not currently a validated  
54

1  
2  
3 diagnostic tool used in medical practice.<sup>102</sup> Thus, the research team will be entirely  
4 transparent with participants and inform them at the study outset that their results will  
5 not be shared with them or their healthcare professional—as it is not currently a  
6 diagnostic tool. Any and all published work from the data will only include group  
7 statistics (and not individual trends) and will always include de-identified participant  
8 identification numbers (and not participant names).  
9

## 10.8 PUBLICATION AND DATA SHARING POLICY

### 10.8.1 Dissemination of Study Findings

18 Prior to submission for publication or for presentation of any data or results obtained in  
19 this study, notification of the study Investigators (Principle and Co-Principle  
20 Investigators) is required. Draft manuscripts, abstracts and presentations should be  
21 submitted to the study Investigators for review and approval well in advance of  
22 applicable submission deadlines.  
23  
24  
25  
26

### 10.8.2 Authorship

30 Authorship of publications resulting from this study should accurately reflect the  
31 academic contribution of individuals to the design and implementation of the trial,  
32 analysis of the data and preparation of the manuscript. No researcher shall include  
33 identifiable personal health information in any publication or presentation.  
34  
35  
36  
37

### 10.8.3 Data Ownership

38 The University of New Brunswick will retain the ownership of the data obtained in this  
39 study. All publications that arise from the use of data will give acknowledgement,  
40 attribution, or co-authorship as appropriate in accordance with the International  
41 Committee of Medication Journal Editors (ICMJE) standards.  
42  
43  
44  
45  
46  
47  
48  
49  
50  
51  
52  
53  
54

## 11. DISCUSSION

Older adults at risk for ADRDs have incident rates of related syndromes several times higher than their cognitively healthy counterparts<sup>103</sup>. Additionally, these populations of individuals at risk for ADRDs have an increased risk of falling and mobility decline<sup>104,105</sup>. Physical exercise, and cognitive training are emerging and promising non-pharmacological interventions to enhance mobility and cognitive functioning in older adults, especially in pre-dementia states prior to onset. These interventions have been tested separately, with positive results for physical exercise and cognitive training in improving cognitive function<sup>30,32,35,42,46</sup>. To our knowledge, this is the first study establishing the feasibility of conducting an entirely home-based combined exercise and cognitive training intervention program for older adults at risk for ADRDs.

### 11.1 SIGNIFICANCE OF ESTABLISHING FEASIBILITY

The goal of establishing the feasibility of conducting a home-based combined intervention program is critical, as it has the potential to inform other researchers on the logistics of designing remote intervention programs. In addition, in light of the physical distancing procedures implemented worldwide after the 2020 COVID-19 pandemic—many older adults have been further isolated in their homes. The SYNERGIC@Home trial is one of the first studies that has adapted to these unique times, allowing older adults to take part in various intervention and assessment procedures from the safety and comfort of their homes. If successful, the methodology and procedures tested in this feasibility trial will set the standard for a new platform in which participants are no longer restricted to intervention studies conducted in a physical laboratory.

### 11.2 SIGNIFICANCE OF EXAMINING INTERVENTION PREFERENCE

To address our primary analytic goal of assessing participant's intervention preference, we will examine the potential relationship between preference given for an intervention and the subsequent efficacy of it. We will assess participant's preference both prior to and after the intervention and correlate these values with their adherence to the

1  
2  
3 intervention that they were randomized to receive. If we find that preferences given prior  
4 to intervention are strongly related to subsequent intervention compliance/adherence—  
5 then our data will provide unique insights on factors related to the success of lifestyle  
6 modification trials with community-dwelling older adults. We may find that strong  
7 preferences are weakly correlated with our measures of intervention fidelity. This will  
8 suggest that subsequent intervention trials will not benefit from the added complexity  
9 and cost associated with formally estimating preference effects in randomized control  
10 trials of future intervention studies. Therefore, regardless of the results of our primary  
11 analyses, we believe that the SYNERGIC@Home trial will provide unique insights the  
12 relationship between intervention preference and subsequent fidelity.  
13  
14  
15  
16  
17  
18  
19  
20

### 21 **11.3 SIGNIFICANCE OF SECONDARY OUTCOMES**

22  
23 We believe that the two combined interventions of physical activity and cognitive  
24 training used in conjunction will lead to a cascade of improvements on our secondary  
25 outcomes, such that those in the combined intervention groups will outperform the  
26 control groups on tests of cognitive functioning. We further believe that, if successful,  
27 the combined intervention will further demonstrate a delay in their progression to  
28 dementia. The reasons why each of the interventions will pose benefits to cognitive,  
29 neurological, physical, and psychological health are delineated below.  
30  
31  
32  
33  
34  
35  
36

### 37 **11.4 BENEFITS OF INTERVENTIONS**

#### 38 **11.4.1 Benefits of Exercise**

39  
40 Mechanistically, AE and RT exercises can provoke a cascade of biochemical,  
41 physiological, and structural changes in the brain including increases in blood flow,  
42 neurotrophic factor release, neurogenesis, immune system efficacy and metabolism.  
43 These effects of exercise could combat inflammatory processes and the atrophy of  
44 brain structures both often associated with aging and ADRDs<sup>32,34</sup>. Interventions using  
45 RT exercises have found substantial improvements in high-order cognition (e.g.  
46 executive functions), whereas low-order cognition (e.g. attention, processing speed) is  
47 less benefited<sup>34</sup>. The reason for this selective improvement in cognition is unknown, but  
48  
49  
50  
51  
52  
53  
54  
55

1  
2  
3 it is hypothesized that areas in the brain that modulate executive functions are more  
4 susceptible to both aging and physical exercises interventions. Mechanisms suggested  
5 involve modulation of insulin-like growth factor-1 and insulin sensitivity, decreasing  
6 inflammation, enhancing release of brain-derived neurotrophic factor pathways, and  
7 even decrease brain amyloid load.<sup>35,106,107</sup> Combined exercise interventions have also  
8 shown increased brain volume and muscle mass in older adults.<sup>93</sup>  
9  
10  
11  
12  
13

#### 14 **11.4.2 Benefits of Cognitive Training**

15 Cognitive training can also improve cognition through enhancing brain functioning.  
16 Individuals who practiced monitoring of two tasks at the same time (i.e. dual-task  
17 training) on computer devices have presented with improved connectivity between  
18 prefrontal and temporal cortices, areas known to be important for executive functioning  
19 and memory, when compared to control participants.<sup>40</sup> Furthermore, imaging in these  
20 participants showed increased activity in these cortical areas during resting state, as  
21 shown by increased blood flow. With this, implementing a dual-task cognitive training  
22 program in older adults has the potential to selectively improve high-order cognitive  
23 functioning through brain plasticity and improved activation.  
24  
25  
26  
27  
28  
29  
30  
31  
32

#### 33 **11.5 STRENGTHS AND CONCLUDING REMARKS**

34 To our knowledge, this feasibility randomized control trial is the first to test the feasibility  
35 of implementing a combined physical aerobic exercise and resistance training program  
36 with cognitive training program at home to improve cognition in a sample of community-  
37 dwelling older adults at risk for ADRDs. We also believe this is one of the first home-  
38 based intervention trials for older adults, in which all aspects of the study protocol are  
39 being administered remotely. With this study, we will build capacity in implementing a  
40 multifaceted home-based intervention to delay dementia in a sample of community-  
41 dwelling older adults. We will also establish the extent to which measuring participant  
42 preference for a given intervention is related to subsequent adherence and compliance  
43 to the intervention treatment. We believe that this will inform other researchers and  
44 scholars alike on whether or not the costs and efforts associated with tailoring  
45  
46  
47  
48  
49  
50  
51  
52  
53  
54  
55  
56  
57  
58  
59  
60

1  
2  
3 interventions in future studies to match participant preferences are a worthwhile  
4 endeavor.  
5  
6

7  
8 Furthermore, we are collaborating with a team of expert engineers and scientists to  
9 collect and examine a wealth of data from the actigraphy devices (ActiGraph GT9X).  
10 This collaboration with an engineering team will allow us to collect and analyze a large  
11 subset of objective measures of sleep and wake cycles, cardiovascular measures  
12 including heart rate, and mobility and gait parameters on a continuous basis.  
13  
14  
15

16  
17 In conclusion, SYNERGIC@Home will build capacity for future research RCT design  
18 using home-based interventions in older adults at risk for ADRDs.  
19  
20  
21  
22  
23  
24

## 25 **12. RESEARCH TIMELINE**

26  
27  
28  
29

30 We wish to begin this project in January 2021. This study will be completed within two  
31 years of its start date: end date estimated for October 31, 2022. It is anticipated that  
32 patient recruitment will occur over at least a 10-month period and could be extended  
33 beyond this time depending on the results obtained.  
34  
35  
36  
37  
38  
39  
40  
41  
42  
43  
44  
45  
46  
47  
48  
49  
50  
51  
52  
53  
54  
55  
56  
57  
58  
59  
60

### 13. LIST OF ABBREVIATIONS

AD: Alzheimer's Disease

ADAS-Cog: Alzheimer's Disease Assessment Scale-Cognitive

ADCS-ADL: Alzheimer Disease Cooperative Study Activities of Daily Living

ADNI: Alzheimer's Disease Neuroimaging Initiative

ADRD: Alzheimer's Disease and Related Dementia

AE: Aerobic exercise

ANCOVA: Analysis of Covariance

A $\beta$ : amyloid- $\beta$

BAT: Balance and Toning

BDNF: Brain-Derived Neurotrophic Factor

BHSP: Brain Health Support Program

BNT: Boston Naming Test

CCNA: Canadian Consortium in Neurodegeneration and Aging

CDR: Clinical Dementia Rating

CFC 2: Cognitive Functional Composite

CI: Cognitively Intact

COMPASS-ND: The Comprehensive Assessment of Neurodegeneration and Dementia



1  
2  
3 CV: Coefficient of Variation  
4

5  
6 FACETS: Functional Assessment of Currently Employed Technology Scale  
7

8  
9 GAD 7: Generalized Anxiety Disorder 7  
10

11  
12 GDS-30: Geriatric Depression Scale  
13

14  
15 IADL: Instrumental Activities of Daily Living  
16

17  
18 ICH-GCP: International Conference on Harmonization Good Clinical Practice  
19

20  
21 ITT: Intention-To-Treat  
22

23  
24 LSQ: Life Space Questionnaire  
25

26  
27 MCI: Mild Cognitive Impairment  
28

29  
30 MDA-14: Mediterranean Diet Assessment 14-items  
31

32  
33 MoCA: Montreal Cognitive Assessment  
34

35  
36 NTB: Neuropsychological Test Battery  
37

38  
39 PASE: Physical Activity Scale for the Elderly  
40

41  
42 PSQI-18: Pittsburgh Sleep Quality Index 18-items  
43

44  
45 PPA: Per-Protocol Analysis  
46

47  
48 RT: Resistance training  
49

50  
51 SCI: Subjective Cognitive Impairment  
52

53  
54 SF-36: Short Form quality of life questionnaire  
55

1  
2  
3 SPSS: The Statistical Package for the Social Sciences  
4

5  
6 STOFHLA: Short Test of Functional Health Literacy  
7

8  
9 STST: One Minute Sit to Stand Test  
10

11  
12 SYNERGIC: SYNchronizing Exercises, Remedies in Gait and Cognition  
13

14  
15 TCOGS: Telephone Cognitive Screening  
16

17  
18 TMT: Trail-Making Test  
19

20  
21 VBM: Voxel-Based Morphometry  
22

23  
24 VEGF: Vascular Endothelial Growth Factor  
25

26  
27 VRF = Vascular Risk Factors  
28

29  
30 WMHs: White Matter Hyper-intensities  
31  
32  
33  
34

## 35 **14. DECLARATIONS**

36  
37  
38 This study is conducted in compliance with International Conference on Harmonization  
39 Good Clinical Practice (ICH-GCP) and all applicable regulatory and ethical  
40 requirements. All authors and research staff have no declarations, financial or  
41 otherwise, to disclose.  
42  
43  
44  
45  
46  
47  
48  
49  
50  
51  
52  
53  
54

## 15. APPENDICES

### APPENDIX A: INTERVENTION PREFERENCE QUESTIONNAIRE

Participant ID # \_\_\_\_\_

Date (dd-mm-yyyy) \_\_\_\_\_

1. Given what you know *at this point in time*, please indicate how interested you are in each of the following interventions, by placing a mark along the line between no interest and strong interest.

Rate your level of interest in **physical exercise** as a way to improve your brain health

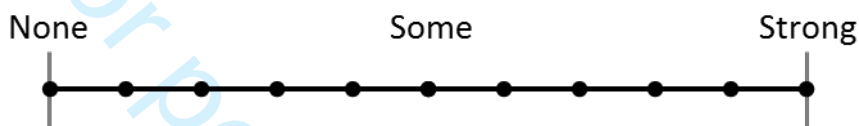

Rate your level of interest in **brain exercise** as a way to improve your brain health

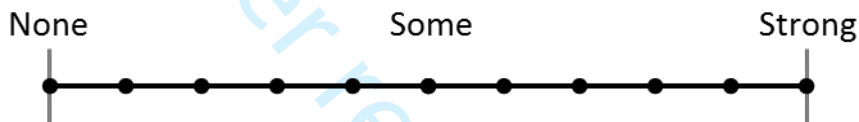

2. Please rate your preference between physical exercise and brain exercise training. Select the response below that best describes your preference at this point in time.

- Strong preference for **physical exercise**
- Slight preference for **physical exercise**
- No preference
- Slight preference for **brain exercise**
- Strong preference for **brain exercise**

3. If you have selected that you prefer one of the interventions over the other, please indicate *why* you prefer it. If you have an equal preference, then you may skip this question.

4. Are there other interventions (besides physical exercise and cognitive training) that you would prefer? If so, please describe them below:

1  
2  
3  
4  
5

- 6  
7 5. Please indicate if you have any additional comments pertaining to the  
8 interventions in this study below:

9  
10  
11  
12  
13

14  
15  
16  
17  
18  
19  
20  
21  
22  
23  
24  
25  
26  
27  
28  
29  
30  
31  
32  
33  
34  
35  
36  
37  
38  
39  
40  
41  
42  
43  
44  
45  
46  
47  
48  
49  
50  
51  
52  
53  
54  
55  
56  
57  
58  
59  
60

For peer review only

## APPENDIX B: MATERIALS GIVEN TO PARTICIPANTS

The following items will be given to participants.

1. An ActiGraph GT9X Activity Monitor
2. A blood pressure cuff and monitor
3. A set of colourful exercise resistance bands for individuals in the AE+RT exercise condition.
4. An exercise mat for individuals in the BAT exercise condition.
5. A standard roll of measuring tape
6. A saliva kit

## APPENDIX C: RECRUITMENT PLAN AND MATERIALS

| <b>SYNERGIC@Home RECRUITMENT PLAN</b>                                                                               |                                                                                                                                                                                                                                                                                                                                                                                                                                                        |
|---------------------------------------------------------------------------------------------------------------------|--------------------------------------------------------------------------------------------------------------------------------------------------------------------------------------------------------------------------------------------------------------------------------------------------------------------------------------------------------------------------------------------------------------------------------------------------------|
| <b>Target Organization / Group / Provider / Platform</b>                                                            | <b>Methods</b>                                                                                                                                                                                                                                                                                                                                                                                                                                         |
| <b>NB-PALM website</b>                                                                                              | <ul style="list-style-type: none"> <li>Promote SYNERGIC@Home study through email synergic@unb.ca</li> </ul>                                                                                                                                                                                                                                                                                                                                            |
| <b>Horizon Health Research Registry Patient Database</b>                                                            | <ul style="list-style-type: none"> <li>Identify potential research participants who have joined the Research Registry and have volunteered to be included in brain health related studies.</li> </ul>                                                                                                                                                                                                                                                  |
| <b>Social Media</b>                                                                                                 | <ul style="list-style-type: none"> <li>Materials will be specifically developed with messages appropriate for posting on Facebook and other platforms popular with community dwelling older adults</li> </ul>                                                                                                                                                                                                                                          |
| <b>Senior Goodwill Ambassador Program</b><br><b>Go Ahead Seniors/Aînés en Marche</b>                                | <ul style="list-style-type: none"> <li>Trained community volunteers who promote exercise and healthy living throughout NB</li> <li>Email and flyers will be provided to the volunteer leaders of these programs for distribution to participants</li> </ul>                                                                                                                                                                                            |
| <b>Provincial Anglophone and Francophone Seniors' Organizations</b><br><b>Seniors and Healthy Aging Secretariat</b> | <ul style="list-style-type: none"> <li>Email and flyers to numerous seniors' organizations for posting on website and / or distribution to members</li> <li>Association francophone des aîné(e)s du Nouveau-Brunswick</li> <li>NB Senior Citizen's Federation</li> <li>Association des universités du 3e âge du Nouveau-Brunswick T</li> </ul>                                                                                                         |
| <b>NB Alzheimer's Society</b>                                                                                       | <ul style="list-style-type: none"> <li>Distribute flyer to facilitators/ coordinators of care giver and patient support groups</li> <li>Post flyer on website</li> <li>Possible e-blast using generic email</li> </ul>                                                                                                                                                                                                                                 |
| <b>Senior Centres</b>                                                                                               | <ul style="list-style-type: none"> <li>Distribute flyer for posting</li> <li>Have centre distribute if membership list is available</li> <li>Seniors' Information Centre – Moncton</li> <li>Seniors' Resource Centre – Saint John</li> <li>Stepping Stone Senior Centre - Fredericton</li> <li>Johnston Avenue Senior Centre – Fredericton</li> <li>Université de troisième Age Nord Ouest</li> <li>Third Age Centre, St. Thomas University</li> </ul> |

| <b>SYNERGIC@Home RECRUITMENT PLAN</b>                                            |                                                                                                                                                                                                                                                                                                                                                                                                                         |
|----------------------------------------------------------------------------------|-------------------------------------------------------------------------------------------------------------------------------------------------------------------------------------------------------------------------------------------------------------------------------------------------------------------------------------------------------------------------------------------------------------------------|
| <b>Target Organization /<br/>Group / Provider /<br/>Platform</b>                 | <b>Methods</b>                                                                                                                                                                                                                                                                                                                                                                                                          |
| <b>Targeted Provincial<br/>Special<br/>Interest/Membership<br/>Organizations</b> | <ul style="list-style-type: none"> <li>• Use list from Seniors and Healthy Aging Secretariat to distribute flyers, email</li> <li>• Distribute flyer for publication in seniors' newsletters, website</li> <li>• NB Society of Retired Teachers</li> <li>• Société des Enseignantes et des Enseignants Retraités Francophones du Nouveau-Brunswick</li> <li>• Email to UNB, U du M. Mt A alumni associations</li> </ul> |
| <b>Geriatric Clinics</b>                                                         | <ul style="list-style-type: none"> <li>• Provide Information Sheet to Geriatricians</li> <li>• Distribute flyer for posting</li> </ul>                                                                                                                                                                                                                                                                                  |
| <b>Primary Care<br/>Physician/Providers</b>                                      | <ul style="list-style-type: none"> <li>• Provide Information Sheet for physicians and NPs</li> <li>• Distribute flyer for posting in office locations</li> </ul>                                                                                                                                                                                                                                                        |
| <b>Community Health<br/>Centres and Community<br/>Mental Health Centres</b>      | <ul style="list-style-type: none"> <li>• Distribute flyer for posting</li> </ul>                                                                                                                                                                                                                                                                                                                                        |
| <b>Community Developers</b>                                                      | <ul style="list-style-type: none"> <li>• Community Developers to distribute generic email, flyers to networks and organizations they work with</li> </ul>                                                                                                                                                                                                                                                               |
| <b>Print media</b>                                                               | <ul style="list-style-type: none"> <li>• Newspaper advertisements in Fredericton, Moncton, Saint John</li> <li>• Advertise in selected rural papers</li> </ul>                                                                                                                                                                                                                                                          |
| <b>Community-based<br/>businesses</b>                                            | <ul style="list-style-type: none"> <li>• Flyers in selected physical locations where community dwelling older adults congregate i.e., libraries, recreation centres</li> </ul>                                                                                                                                                                                                                                          |

# RECRUITMENT FLYER (Image Based)

60-90 years old?

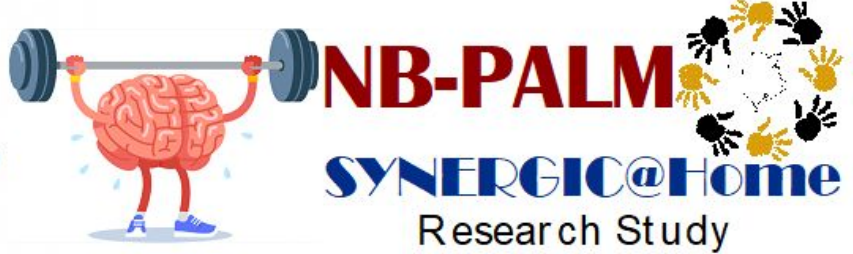

Want to exercise your body and brain in the comfort of your own home?

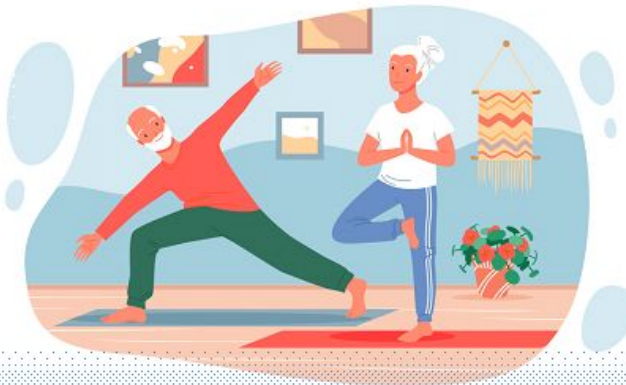

Have access to the Internet at your home?

## 12-month Commitment

- 4-months of body and brain exercise, 3 times a week
- 6 assessment sessions

## Contact Information:

Website: [www.nbpalm.ca](http://www.nbpalm.ca)  
 Email: [synergic@unb.ca](mailto:synergic@unb.ca)  
 Phone: (506) 453-5137

Offered in English and French!

**New Brunswick's brain health initiative: Preventing Alzheimer's by Lessening Modifiable risks**  
 Research Ethics Boards: UNB: #2020-168; UdeM: #2021-049; HHN: #2020-2954; VHN

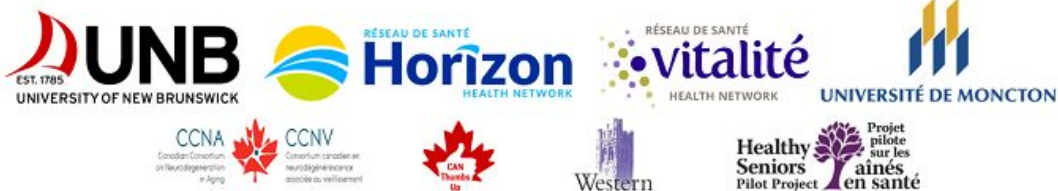



1  
2  
3  
4  
5  
6  
7  
8  
9  
10  
11  
12

Vous avez entre  
60 et 90 ans ?

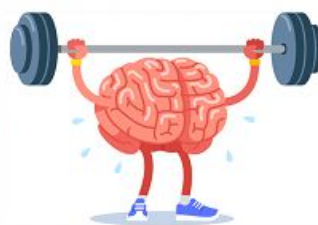

**NB-PAVA**

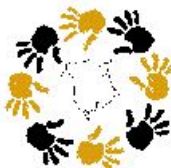

**SYNERGIE~Chez soi**

Projet de recherche

13  
14  
15  
16  
17  
18  
19  
20  
21  
22

Vous voulez entraîner  
votre corps et votre  
cerveau dans le confort  
de votre maison ou  
résidence ?

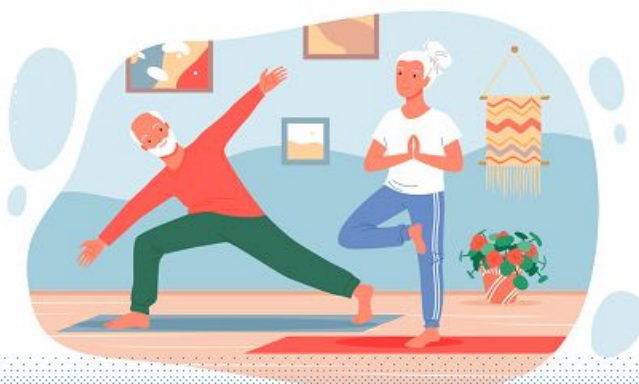

23  
24  
25  
26  
27  
28  
29  
30

Vous avez accès à  
l'internet chez vous ?

31  
32

Participation de 12 mois

- 33  
34  
35  
36  
37  
38  
39  
40  
41  
42
- 4 mois d'exercices pour le corps et le cerveau, 3 fois par semaine
  - 6 séances d'évaluation

Informations :

Site web : [www.nbpalm.ca](http://www.nbpalm.ca)  
 Courriel : [synergic@unb.ca](mailto:synergic@unb.ca)  
 Téléphone : (506) 453-5137

43  
44  
45  
46

Offert en français  
et en anglais

47  
48  
49  
50  
51  
52  
53  
54  
55  
56  
57  
58  
59  
60

Cerveaux en santé du **Nouveau-Brunswick**: Prévenir l'Alzheimer en Vivant Autrement

Comités d'éthique de la recherche : UNB #2020-168, UdeM #2021-049, HHN #2020-2954, VHN

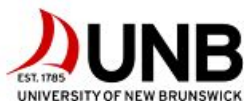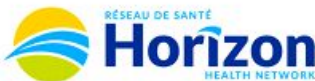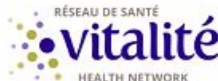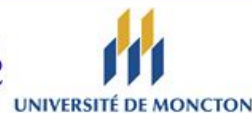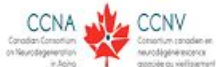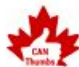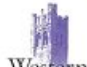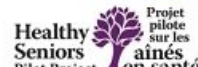

# SYNERGIC@Home

**SYN**chronizing Exercises,  
**Remedies in Gait and Cognition at Home**: Feasibility of a home- based  
 double-blind randomized controlled trial to improve gait and cognition in  
 individuals at risk for dementia

**SYNERGIC@Home** is a research project assessing if it is possible to virtually deliver a home-based physical exercise and cognitive training program to older adults in New Brunswick. The hope is that this intervention will have a positive impact on memory for those at risk of developing dementia.

## RESEARCH STUDY INVESTIGATORS

### Dr. Chris A. McGibbon, PhD

Faculty of Kinesiology and Institute of  
 Biomedical Engineering,  
 University of New Brunswick, New  
 Brunswick, Canada

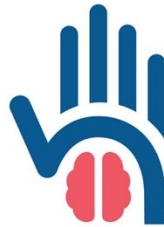

## NB-PALM

Preventing Alzheimer's  
 by Lessening Modifiable risks

### Dr. Pamela Jarrett, MD FRCPC FACP

Department of Geriatric Medicine,  
 Horizon Health Network,  
 Dalhousie Medicine New Brunswick,  
 Saint John, New Brunswick Canada

### Dr. Grant Handrigan, PhD

School of Kinesiology and Recreation, Faculty of Health Sciences and Community Services, Université de Moncton, New Brunswick, Canada

### Dr. Ludivine Witkowski, MD

Department of Neuroscience, Dr. Georges-L.-Dumont University Hospital Centre, Moncton, New Brunswick, Canada

### Dr. Manuel Montero-Odasso, MD, PhD, FRCPC

Schulich School of Medicine & Dentistry, London, Ontario, Canada;  
 Departments of Medicine (Geriatrics) and of Epidemiology and Biostatistics,  
 University of Western Ontario, London, Ontario, Canada

## INTRODUCTION AND BACKGROUND

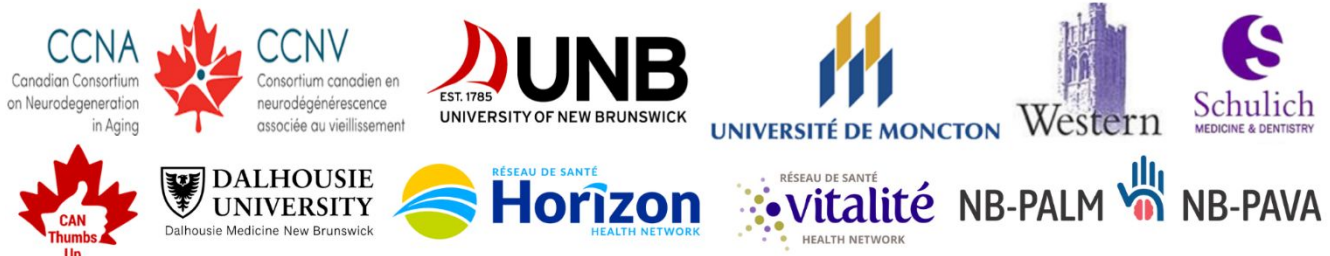

A study called SYNERGIC taking place in Canada, is showing promising results that exercise and cognitive training can be beneficial for older adults who are experiencing early problems with their memory.

This study—**SYNERGIC@Home**— is an extension of the SYNERGIC trial. This study will engage older adults at risk of developing memory problems in a home-based program that will use an online virtual platform called Zoom.

This study is also part of the *New Brunswick Brain Health Initiative: Preventing Alzheimer's through Lifestyle Modification* (NB-PALM), funded by the HealthySeniors Pilot Projects, Public Health Agency of Canada, Province of New Brunswick.

### POPULATION UNDER STUDY

We are looking for interested older adults living in New Brunswick who are at risk for developing dementia between the age of 60 and 90 years.

You may be eligible to participate if you have:

1. **No Memory Problems** but have two or more of the following risk factors:

- Overweight
- Hypertension/High blood pressure
- Diabetes
- Cardiovascular disease
- Physical inactivity
- First-degree family history of dementia (parents, children, siblings)
- High cholesterol
- Poor sleep
- Poor diet

2. Been diagnosed by a physician or nurse practitioner as having **Subjective Cognitive Impairment** or **Mild Cognitive Impairment**.

### DESCRIPTION OF STUDY

This study will take place over 10 months and includes an initial general health questionnaire, memory tests, and mobility assessments. Assessments will occur before the start of the physical exercise and cognitive training, immediately after the training intervention and again at 10 months follow-up. The training intervention will take place over 4 months. The physical exercise and cognitive training sessions will be done virtually over a computer or tablet with a research assistant who is a personal trainer, 3 times per week. Each session will take about 90 minutes.

You are encouraged to have someone close to you who can assist you during the study, but this is not mandatory for everyone.

**IF YOU HAVE FURTHER QUESTIONS REGARDING PARTICIPATION OR ARE INTERESTED IN HEARING MORE ABOUT THIS PLEASE CONTACT:**

**Research Coordinator**

Alana Gullison

Phone: 1 (506) 453-5137

email: synergic@unb.ca

**Research Assistant**

Molly Gallibois

Phone: 1 (506) 447-3197

email: synergic@unb.ca

## RECRUITMENT FLYER

### RECRUITING PARTICIPANTS FOR ONLINE EXERCISE AND MEMORY STUDY TO TAKE PLACE IN YOUR OWN HOME!

Researchers at the University of New Brunswick, Université de Moncton, Horizon Health Network, and Vitalité Health Network are inviting you to participate in *SYNERGIC@Home*, a study about the role of exercise and cognitive training in delaying the onset of dementia and Alzheimer's disease.

#### WHO?

We want to hear from community dwelling older adults living in Anglophone and Francophone communities throughout New Brunswick who may be otherwise healthy, but feel their memory is worsening or have received a medical diagnosis of Mild Cognitive Impairment. If you are between the ages of 60 and 90 years, and meet the following criteria please contact us at [synergicinfo@nb-palm.ca](mailto:synergicinfo@nb-palm.ca)

- Have access to a computer in your home that is connected to high-speed Internet,
- Capable of sending and receiving emails,
- Can read/write/speak in either English or French, and
- Able to walk 10 meters (about 32 feet) independently, with/without a walking aid.
- Have a spouse, relative, or close friend interested in being a study care partner (an exception will be made if a study partner cannot be found)

#### WHERE?

*Research activities* usually done in an exercise lab or hospital setting, will be completed in your own home. This study will help us learn how practical it is to conduct research using video-conferencing to train participants and collect data. Participants' activity and sleep patterns will be monitored using a wrist-watch like device called an activity monitor.

#### WHAT?

Participants will be enrolled for a total of 10 months. You will be assigned an exercise and cognitive training program delivered in 3 – 90 minute sessions per week over 16 weeks.

Sessions consist of both prescribed cognitive training and exercises. A research assistant trained in exercise science will guide participants through the exercises.

Questionnaires and assessments will be completed at various time points such as: screening for enrollment, baseline, and two follow-up sessions. Your medical history and cognitive functioning will be assessed and information collected about your lifestyle habits (e.g., how much exercise and physical activity you do, how well you sleep, your diet, and mental health)

**STUDY CONTACT INFORMATION:**

Synergic@Home Study Research Coordinator

email: synergic@unb.ca

# Initial Recruitment Email

## PROCEDURE:

Following REB approval, this email along the flyer will be sent to organizations that post on their website and do an eblast to members and others including:

- Seniors organizations to include on website and newsletters
- Senior Ambassadors through Healthy Aging and Seniors Secretariat
- Community developers with HHN and VHN

**Email Subject Line:** Take part in a new virtual study called **SYNERGIC@Home!**

## Email Content:

## **NB PARTICIPANTS WANTED FOR AN ONLINE EXERCISE AND MEMORY STUDY IN YOUR OWN HOME!**

You are invited to take part in *SYNERGIC@Home* – a research project studying how *exercise* and cognitive training may delay the onset of dementia and Alzheimer’s disease. We want to hear from community dwelling older adults living in Anglophone and Francophone communities throughout New Brunswick who may be otherwise healthy, but feel their memory is worsening or they have a medical diagnosis of Mild Cognitive Impairment. If you are between the ages of 60 and 90 years and meet the following criteria, we would like to hear from you:

- Have access to a computer in your home that is connected to the high-speed Internet,
- Capable of sending and receiving emails,
- Can read/write/speak in either English or French, and
- Able to walk 10 meters (about 32 feet) independently, with or without a walking aid.
- Have a spouse, relative, or close friend interested in being a study care partner (an exception will be made if a study partner cannot be found)

1  
2  
3 You are INELIGIBLE for our study if you have received a medical diagnosis of dementia  
4 or Alzheimer's disease by your family or specialist physician.  
5  
6

7  
8 Promising Canadian research has shown that older adults who are at risk can benefit  
9 from participating in physical exercise and cognitive training. *We want to learn if* study  
10 activities usually done in an exercise laboratory setting can be virtually completed in a  
11 participant's home. We also want to find out how practical it is to collect data from  
12 participants' about their activity levels and sleep patterns using a wrist-watch like device  
13 called an activity monitor.  
14  
15  
16  
17

18  
19 For further information, please email: synergicinfo@nb-palm.ca  
20  
21

22 *SYNERGIC@Home is conducted by researchers at University of New Brunswick,*  
23 *Université de Moncton, Horizon and Vitalité Health Networks as well the University of*  
24 *Western Ontario. It is part of the project New Brunswick Brain Health Initiative:*  
25 *Preventing Alzheimer's through Lifestyle Modification NB-PALM, which is funded by the*  
26 *Healthy Seniors Pilot Project (NB government) and the Canadian Consortium of*  
27 *Neurodegeneration on Aging. We are always looking for additional participants. If you*  
28 *think someone you know may be interested in taking part in this SYNERGIC@Home,*  
29 *please forward them this email.*  
30  
31  
32  
33  
34  
35  
36

37 Thank you for your interest!  
38  
39

40 Synergic@Home Study Research Coordinator  
41  
42

43 Email: synergic@unb.ca  
44  
45  
46  
47  
48  
49  
50  
51  
52  
53  
54

# Recruitment Newspaper Advertisement

## Recruitment Newspaper Advertisement Content as follows:

SYNERGIC@Home Newspaper Advertisement

### Procedure

- To advertise in selected NB newspapers assuming budget is available; i.e., Telegraph Journal (Saint John, Fredericton, Moncton issues)
- To advertise in selected rural newspapers assuming budget availability.

## **RECRUITING PARTICIPANTS FOR AN ONLINE EXERCISE AND MEMORY STUDY IN YOUR OWN HOME!**

Feeling as if your memory is worsening?

Have you received a medical diagnosis of Mild Cognitive Impairment?

If so, you may be eligible to be a participant in

**SYNERGIC@Home**

A home-based virtual exercise and cognitive training research study for community living older adults residing in Anglophone and Francophone communities at risk of developing dementia and Alzheimer's Disease

For more information contact us at [synergic@unb.ca](mailto:synergic@unb.ca)



## Follow-up Email

Dear\*\*\*\*

I am a Study Research Coordinator with the SYNERGIC@Home study. I understand that you are interested in learning about our study.

I have enclosed a copy of the consent forms that provides detailed information on this project including the requirements of your participation.

I will follow up with you in a few weeks to see if you might be interested in participating.

In the meantime, if you have any questions, please email or call me as per the information below.

Thank you for your interest!

Synergic@Home Study Research Coordinator

Email: synergic@unb.ca

# Study Information for Physicians / Providers

We are inviting you to discuss the following opportunity with your patients.

## *SYNERGIC@Home*

**An online exercise and cognitive training program taking place in the participant's own home**

### *What is the Synergic@Home study?*

*SYNERGIC@Home, is a provincial study taking place throughout New Brunswick and will involve 64 participants from rural and urban locations who will “virtually” participate.*

The study goals are twofold. The first is to learn about the role of exercise and cognitive training in preventing or delaying the onset of dementia and Alzheimer's disease; while the second goal is to find out how practical it is to conduct this research in a participant's home.

By participating in this study your patients will be making a valuable contribution about how to conduct research in a home environment that previously was conducted in hospital and university settings.

### *What is expected of participants?*

*Study participants must meet detailed inclusion and exclusion criteria which will be provide to you. A brief overview is as follows:*

- Have access to a home computer that is connected to the high-speed Internet
- Capable of sending and receiving emails,
- Can read/write/speak in either English or French
- Able to walk 10 meters (about 32 feet) independently, with or without a walking aid
- Have a spouse, relative, or close friend interested in being a study care partner (an exception will be made if a study partner cannot be found)

*Study participants will be randomly assigned to one of four exercise and cognitive training groups and asked to participate via Zoom. as outlined below:*

The following table contains details of the study procedures /activities that you may wish to share/discuss with your patient.

| <b>Details of Research Study Assessments and Intervention</b> |                                                        |                                                                                                                                                                                                                                                                                                                                                                                                                                                                                                  |
|---------------------------------------------------------------|--------------------------------------------------------|--------------------------------------------------------------------------------------------------------------------------------------------------------------------------------------------------------------------------------------------------------------------------------------------------------------------------------------------------------------------------------------------------------------------------------------------------------------------------------------------------|
| <b>Participant Activities</b>                                 | <b>When does this happen? How long will this take?</b> | <b>Description</b>                                                                                                                                                                                                                                                                                                                                                                                                                                                                               |
| Consent & Clinical / Cognitive Screening                      | At consent: 2 hours                                    | <p>Screening is what you take part in to see if you are eligible to enter our study. The study team will review the Informed Consent Form with you to answer your questions about the study. After you sign the consent, the study team will ask questions about your:</p> <ul style="list-style-type: none"> <li>▪ Personal and demographic information</li> <li>▪ Health, family medical history, medications</li> </ul> <p>The study team will also test your memory and thinking skills.</p> |
| Mobility & Lifestyle Screening                                | After giving your consent: 2 hours                     | You will be asked to questions about your lifestyle, physical activity, sleep patterns, and diet. You will be asked to perform tests to assess your walking speed and mobility. The study team will assist via you in taking measurements such blood pressure and waist size.                                                                                                                                                                                                                    |
| Physician & Participant Conference                            | After giving your consent: 1 hour                      | You will meet with a research physician who will review your medical history and discuss any specific concerns or questions related to your eligibility for participation in our study.                                                                                                                                                                                                                                                                                                          |
| Activity Monitoring                                           | Before the intervention begins: 10 days                | You will wear an activity monitoring device similar to a wristwatch for 24 hours each day. This device records information about your activities and hours of sleep. This equipment will be sent to you via a secure courier and you will return it to the study team at the end of the 10 days.                                                                                                                                                                                                 |
| Activity Assessment                                           | Before the intervention begins: 2 hours                | You will be asked to perform tests to assess your mobility and walking speed.                                                                                                                                                                                                                                                                                                                                                                                                                    |
| Cognitive Assessment                                          | Before the Intervention begins: 2 hours                | The study team will conduct tests to assess your memory, language, attention span, and problem-solving abilities.                                                                                                                                                                                                                                                                                                                                                                                |
| Study                                                         | After you are enrolled: 96 hours                       | The research team will assign to a study group. You will follow exercise and cognitive training                                                                                                                                                                                                                                                                                                                                                                                                  |

|                           |                                                    |                                                                                                                                                                                                                                                               |
|---------------------------|----------------------------------------------------|---------------------------------------------------------------------------------------------------------------------------------------------------------------------------------------------------------------------------------------------------------------|
| Intervention              |                                                    | programs via Zoom for 2 hours per day, 3 times per week for 16 weeks. A research assistant will be present during each of the exercise sessions.                                                                                                              |
| Activity Monitoring       | After completing the intervention: 10 days         | About four months after you began your exercise and cognitive training program, you will once again wear an activity monitoring device for a period of 10 days. This equipment will be sent to you via a secure courier and you will return it after 10 days. |
| Activity Assessment       | After completing the intervention:<br>2 hours      | You will be asked to perform tests to assess your mobility and walking speed.                                                                                                                                                                                 |
| Cognitive Assessment      | After completing the intervention: 2 hours         | The study team will conduct tests to assess your memory, language, attention span, and problem-solving abilities.                                                                                                                                             |
| Activity Monitoring       | 10 months after beginning the study: 10 days       | For the final time, you will wear an activity monitoring device. Equipment will be provided as before and you will return it after 10 days.                                                                                                                   |
| Activity Assessment       | 10 months after beginning the study: 2 hours       | You will be asked to perform tests to assess your mobility and walking speed.                                                                                                                                                                                 |
| Cognitive Assessment      | 10 months after beginning the study: 2 hours       | The study team will perform tests to assess your memory, language, attention span, and problem-solving abilities.                                                                                                                                             |
| Semi-structured interview | 10 months after beginning the study: 30-45 minutes | A member of the study team will arrange a time for you to be interviewed via Zoom. You will be asked questions about your experience as a study participant.                                                                                                  |

If you have questions about this study or would like to send along a referral, please contact the Synergic@Home Study Research Coordinator.

Email: synergic@unb.ca

# Recruitment Discussion Guide for Obtaining Consent

## PROCEDURE

- Following REB approval, this discussion guide will be used by the Research Coordinators at HHN and VHN to review the consent form with the prospective participant and obtain consent.

## INTRODUCTION

Hi my name is *[insert name]*. I am a Research coordinator with *[insert name]* which is one of our study sites.

I'm calling about the research study called Synergic@Home. I understand that you contacted us to say you were interested in becoming a participant. You indicated you saw the flyer in *[insert if this information is known]*. The reason I am calling is to discuss the study and proceed with obtaining your consent to participate in our study if you are ready to make that decision today.

Before we start, I'd like to *[confirm or obtain]* some basic personal information.

**Name of Potential Study Participant:**

\_\_\_\_\_

**Email:** \_\_\_\_\_

**Phone number:** \_\_\_\_\_

**Home address:** \_\_\_\_\_

**Age:** \_\_\_\_\_

1  
2  
3 Next, I'd like to carefully go over different sections of our form to make sure you  
4 understand what's involved and your role as a study participant.  
5  
6

7  
8 So if you're okay to start, let's begin.  
9

10 Did you receive the consent form that we recently mailed to you or sent via email?  
11

- 12  
13
- 14 • You did receive it – that's terrific.
- 15

16 Have you had an opportunity to read through it in detail?  
17

- 18  
19
- 20 • You did – that's wonderful.
- 21

22 As you were reading through it, did you make notes by any sections or sentences that  
23 you want to discuss with me? Or that you want me to explain or clarify?  
24

25 RESPONSE 1:  
26

- 27  
28
- 29 • The form was very informative and I am ready to sign it.
- 30

31 If that's the case, then before we sign it, I'd like to go over some particular sections of  
32 the form. It's my role to make sure that you fully understand and are informed about  
33 your rights as a study participant.  
34  
35

36 RESPONSE 2:  
37

- 38  
39
- 40 • Answer the specific questions.
- 41

42 Then move on to reviewing the sections of the form that were not addressed by the  
43 questions. "It's my role to make sure that you fully understand and are informed about  
44 your rights as a study participant. I noticed that there are some sections of the form that  
45 you didn't have any questions about, so before we sign it, I'd like to go over some  
46 particular sections of the form".  
47  
48  
49  
50  
51  
52  
53  
54

## BEGIN TO REVIEW THE SPECIFIC SECTIONS OF THE CONSENT FORM

Let's start with you answering a FEW KEY QUESTIONS and then we'll walk through other sections of the consent. Here's the first question:

Have you discussed your participation with your any family members, friends or your family physician?

- Yes or no

Do you understand that your participation in Synergic @ Home is your decision?

- Yes or no

Are you aware that your participation in Synergic @ Home is entirely voluntary?

- Yes or no

I want to stress that you can withdraw from the study at any time

- Understood or not

Finally, will you be having a study care partner? A study care partner is a spouse or family member or friend who will be asked information about your health behaviors at various time as well as provide you with support and encouragement throughout the study.

- Yes – I have a study partner.
  - Who is going to be your study partner?
  - What is their relationship?
  - I will need contact information as this person will also need to sign a consent form.
- No study partner.

## RESEARCH PURPOSE AND BACKGROUND:

Do you have any questions about why we are doing this study?

- Yes - no

We are pleased to be offering the SYNERGIC@Home feasibility trial to NB residents. We are used to doing this research in a laboratory setting at a university or health center. So, since we can no longer bring people in during the pandemic, we decided to conduct a study about exercise and cognitive training in a participant's home using video-conferencing. Your participation will help us learn about the practicalities of doing this type of research remotely.

## STUDY PROCEDURES

The consent describes the study activities in various sections. When you become a participant, you will be enrolled in an exercise and cognitive training program that you take part in for three sessions each week over 16 weeks. Each of these weekly sessions will consist of both cognitive training and exercises and will last about an hour and one-half. During each of these sessions a research coordinator who is trained in exercise science will guide you through your program.

Do you have any questions about the amount of time needed to participate each week?

As a participant in our study there are numerous questionnaires you will be asked to complete along with assessments that research coordinators such as myself will be conducting with you [and your study partner].

Now as you saw in the different sections describing the study activities, there are various times during the study when we will collect information from you [and your study partner if available]. This is when we will ask you questions about your medical history as well as assess your cognitive functioning. We do this by asking you questions that test your memory and thinking skills. We also use questionnaires that ask your lifestyle habits such as how much exercise and physical activity you do, how well you sleep, your diet as well your mental health.



1  
2  
3 Any questions about the assessments and questionnaires?  
4  
5

6 In order to complete the study exercise activities you will need some equipment which  
7 we will send to your home for you to use throughout the study. Some examples are an  
8 activity monitor, exercise mat, blood pressure cuff, and so on. If you are familiar with a  
9 Fitbit – this is what the activity monitor looks like and you wear it like a wristwatch such  
10 as shown in the picture. It records information about your activity and sleep levels and  
11 you will return this to us at various times throughout the study. We will also get you to  
12 take your blood pressure and certain other measurements.  
13  
14  
15  
16  
17  
18

19 I imagine this is a lot of information to take in, however there will always be someone  
20 guiding you on the video-conference while you are using this equipment. Some of the  
21 equipment you will be able to keep, while others like the activity monitor and blood  
22 pressure cuff you will return at the end of the study.  
23  
24  
25  
26

27 Do you have any questions about the equipment?  
28  
29

30 You may be wondering about our sanitation procedures. Each time after you return the  
31 equipment, it will be thoroughly cleaned and sanitized prior to mailing it back to you.  
32  
33  
34

35 We will also be sending you a manual that will contain easy to read instructions about  
36 various aspects of the study. And remember that someone will always be available by  
37 phone, video-conference, or email if you have any questions.  
38  
39  
40

41 It's important for you to understand that before you can become a participant, we will  
42 need to collect information during a screening visit that will help us determine if you  
43 meet the study eligibility criteria. Do you have any questions about this aspect?  
44  
45  
46

47 It will no doubt be me that will meet with you [and your study partner] to complete this  
48 assessment. There may also be another nurse who has a background in research who  
49 will interview you. Between the two of us, we will gather information to help us decide  
50 about your suitability for our study.  
51  
52  
53  
54

## **RISKS AND DISCOMFORTS**

Do you have any questions about the section in the form that described the risks and discomforts?

As I previously mentioned, we will be giving your cognitive training tests and exercises to do three times a week. And, depending on how much exercise you are used to doing, you may experience some discomfort while you are performing the exercises. If you do, you can stop at any time. And our research coordinator will be watching you as you exercise. S/he will ask you to stop if you are experiencing shortness of breath, chest pain, dizziness, or unsteadiness.

During the cognitive training part of each session you may experience some frustration as you complete the tasks. Also, you may feel a bit of discomfort if you are not used to wearing a wrist watch but hopefully that won't happen!

Finally, you know that we have various questions and assessments that will take some time to complete. We know this can be frustrating for some people. And we know from our experience that some questions may trigger an unpleasant memory or distressing feelings. We will watch closely for your reactions and will suggest taking a break. And as always, you can ask to take a break at any time.

We are not aware of any side effects from wearing the activity monitor.

I also want to stress that it's your right to stop your participation in the study at any time and there is no judgement or penalty if you decide to do so. Also you don't need to give a written note notifying your withdrawal. Okay?

## **COST/BENEFIT**

There is no direct cost for you to participate. We will provide everything you need except of course your computer or laptop and the internet connection.

1  
2  
3 In relation to benefits, so far some of our participants have mentioned they are pleased  
4 to be taking part in a NB study that will help researchers learn more about how to do  
5 this type of research in a participant's own home.  
6  
7

8  
9 Are there any questions about this section?  
10

## 11 **PRIVACY AND CONFIDENTIALITY**

12

13  
14  
15 The section on privacy and confidentiality is quite detailed.  
16

17  
18 Do you have any questions about the procedures we described about how your  
19 personal information including your name, email, phone number, address, medical  
20 conditions and so on will be protected and kept private throughout the study?  
21  
22

- 23  
24 • If yes, answer the questions.....  
25

26  
27 I know we also described numerous ways about how your personal research data will  
28 be stored. Do you have any concerns about the information that is included in this  
29 section of the form?  
30

- 31  
32  
33 • If yes, answer the questions.  
34

35 Now if you're ready, I'm going to ask if you would like to participate in this study?  
36

- 37  
38 • If no - thank you very much for your time.  
39
- 40  
41 • If yes – let's proceed to the section of the form where I need to obtain your  
42 consent.  
43

44  
45 Direction: Proceed to review the different sections where you need to obtain consent.  
46 I.e., get initials in each box or sentence pertaining to the various study components.  
47

48  
49 After finalizing the consent form, provide directions as to how to return the form.  
50

- 51  
52 • If returned by email they will need to scan the original and email it to you.  
53
- 54

- If returned by mail, the research coordinator will need to make a copy which is then returned by email or mail to the participant.

Now before I finish our call, I'd like to get the contact information for your study partner [if one is participating]

|                                                                                                                                                     |
|-----------------------------------------------------------------------------------------------------------------------------------------------------|
| <p><b>Name of Potential Study Partner:</b> _____</p> <p><b>Email:</b> _____</p> <p><b>Phone number:</b> _____</p> <p><b>Home address:</b> _____</p> |
|-----------------------------------------------------------------------------------------------------------------------------------------------------|

Thank you for taking the time to review the form and agreeing to participate. I will be in touch with you to confirm a time when we will conduct the screening assessment. In the meantime, you have my contact information [provide email and phone number]. If you have any questions don't hesitate to be in touch. Good bye for now.

## APPENDIX D: EXIT QUESTIONNAIRE

### SYNERGIC@Home Exit Questionnaire

| Rate how much you agree or disagree with each statement                              | Strongly Disagree     | Disagree              | Neutral               | Agree                 | Strongly Agree        |
|--------------------------------------------------------------------------------------|-----------------------|-----------------------|-----------------------|-----------------------|-----------------------|
| 1. <i>Zoom</i> was easy to use in completing my exercise program.                    | <input type="radio"/> |
| 2. Wearing the activity monitor was not a problem for me.                            | <input type="radio"/> |
| 3. I did not like using my own computer/laptop to participate.                       | <input type="radio"/> |
| 4. I did not like having a research assistant supervise my exercises.                | <input type="radio"/> |
| 5. Taking part in the program 3 days per week was the right amount of time for me.   | <input type="radio"/> |
| 6. Exercising in my own home was convenient.                                         | <input type="radio"/> |
| 7. I encountered many problems with my internet connection.                          | <input type="radio"/> |
| 8. The research assistant was helpful in assisting me to complete my exercises.      | <input type="radio"/> |
| 9. I was frustrated because the exercises were too difficult to complete in my home. | <input type="radio"/> |
| 10. I did not enjoy completing the assessments and testing on <i>Zoom</i> .          | <input type="radio"/> |
| 11. Each week I looked forward to my cognitive training program.                     | <input type="radio"/> |
| 12. Participating took too much time away from my other activities.                  | <input type="radio"/> |

1  
2  
3  
4 13. Wearing the activity monitor  
5 interfered with my sleep and other  
6 activities.

7  
8  
9 14. I was able to form a positive  
10 relationship with the research  
11 assistant.

12  
13 15. I would have preferred exercising  
14 with a group of my peers.

15  
16 16. I felt anxious when I was asked  
17 questions that tested my memory.

18  
19 17. I enjoyed doing the cognitive  
20 exercises.

21  
22  
23 18. I would have preferred having one  
24 of my peers or someone who is my  
25 age assist with my exercises.

26  
27  
28  
29 19. There were 4 intervention groups participating in the SYNERGIC@Home research study.  
30 Of the four groups listed below, which one do you think you were assigned to?

- 31  
32  Active exercises and active cognitive training  
33  Active exercises and limited cognitive training  
34  Limited exercises and active cognitive training  
35  Limited exercises and limited cognitive training  
36

37  
38 20. We are interested in hearing about what motivated you to complete the interventions.  
39 Please describe the factors or reasons that influenced your decision.  
40

41  
42 \_\_\_\_\_  
43 \_\_\_\_\_  
44 \_\_\_\_\_  
45 \_\_\_\_\_  
46 \_\_\_\_\_  
47 \_\_\_\_\_  
48 \_\_\_\_\_  
49

1  
2  
3 **APPENDIX E: SEMI-STRUCTURED INTERVIEW GUIDE**  
4  
5

6

| Semi-Structured Interview Guide                                                                                                                                                                                                                   |                                                                                                                                                                                                                                                                                                                                                                                                                                                            |
|---------------------------------------------------------------------------------------------------------------------------------------------------------------------------------------------------------------------------------------------------|------------------------------------------------------------------------------------------------------------------------------------------------------------------------------------------------------------------------------------------------------------------------------------------------------------------------------------------------------------------------------------------------------------------------------------------------------------|
| Dimension                                                                                                                                                                                                                                         | Questions                                                                                                                                                                                                                                                                                                                                                                                                                                                  |
| <p>9 <b>Reaction to Participation in Research Study</b><br/>10<br/>11<br/>12<br/>13<br/>14<br/>15<br/>16<br/>17<br/>18<br/>19<br/>20<br/>21<br/>22<br/>23<br/>24<br/>25<br/>26<br/>27<br/>28<br/>29<br/>30<br/>31<br/>32<br/>33<br/>34<br/>35</p> | <p><b>Overarching Questions:</b></p> <p>How satisfied were you with the study?</p> <p>How was the support you received during the study?</p> <p><b>Probing Questions:</b></p> <p>What was your experience:</p> <ul style="list-style-type: none"> <li>▪ Doing this study over the Internet?</li> <li>▪ With the equipment you used?</li> </ul> <p>What are your thoughts about the assessments that took place?</p> <p>How can this study be improved?</p> |
| <p>36 <b>Learning That Occurred During the Research Study</b><br/>37<br/>38<br/>39<br/>40<br/>41<br/>42<br/>43<br/>44<br/>45<br/>46<br/>47<br/>48<br/>49<br/>50<br/>51<br/>52<br/>53<br/>54<br/>55<br/>56<br/>57<br/>58<br/>59<br/>60</p>         | <p><b>Overarching Questions:</b></p> <p>What knowledge or information about exercise did you learn from your participation?</p> <p>What did you learn from your involvement with cognitive training?</p>                                                                                                                                                                                                                                                   |

| <b>Semi-Structured Interview Guide</b>                                                                                                                                                |                                                                                                                                                                                                                                                      |
|---------------------------------------------------------------------------------------------------------------------------------------------------------------------------------------|------------------------------------------------------------------------------------------------------------------------------------------------------------------------------------------------------------------------------------------------------|
|                                                                                                                                                                                       | <p><b>Probing Questions:</b></p> <p>Were there any areas that you had to “unlearn”? For example, did you find out that you had been doing exercises inappropriately?</p> <p>Have you identified any differences in your memory or concentration?</p> |
| <p><b>Behaviour Changes That Occurred During the Research Study</b></p>                                                                                                               | <p><b>Overarching Questions:</b></p> <p>Have you modified your behaviour as a result of participating in the study? If yes, what are they?</p> <p>Can you identify any motivators that helped you to change or modify your behaviours?</p>           |
| <p><b>Results Identified by the Participants</b></p>                                                                                                                                  | <p><b>Overarching Questions</b></p> <p>What have been the greatest results for you?</p>                                                                                                                                                              |
| <p><b>Concluding Questions / Comments</b></p> <p>Is there anything that has not been asked that needs to be brought forward?</p> <p>Are there any comments you would like to add?</p> |                                                                                                                                                                                                                                                      |



1  
2  
3  
4  
5  
6  
7  
8  
9  
10  
11  
12  
13  
14  
15  
16  
17  
18  
19  
20  
21  
22  
23  
24  
25  
26  
27  
28  
29  
30  
31  
32  
33  
34  
35  
36  
37  
38  
39  
40  
41  
42  
43  
44  
45  
46  
47  
48  
49  
50  
51  
52  
53  
54  
55  
56  
57  
58  
59  
60

**APPENDIX F: CASE REPORT FORMS**

For peer review only

## APPENDIX G BUDGET SUMMARY

**Budget Summary for Synergic@Home Study**

|                              |                                                                                                          |
|------------------------------|----------------------------------------------------------------------------------------------------------|
| <b>Funding Source:</b>       | Health Seniors Pilot Project (HSPP)                                                                      |
| <b>Project Title:</b>        | The New Brunswick Brain Health Initiative: Preventing Alzheimer's by Lessening Modifiable risk (NB-PALM) |
| <b>Project Award Amount:</b> | \$2.69M                                                                                                  |
| <b>Study Title:</b>          | SYNERGIC@Home/SYNERGIE~Chez soi                                                                          |
| <b>Study Budget Amount:</b>  | \$559,049.69                                                                                             |

| <b>Synergic@Home<br/>Study Budget</b>      | <b>Study Budget<br/>Nov 2020 to end Oct 2022</b> |
|--------------------------------------------|--------------------------------------------------|
| <b>A) Personnel (include 20% benefits)</b> |                                                  |
| HHN Clinical Research Coordinator          | \$ 149,760.00                                    |
| VHN Clinical Research Coordinator          | \$ 140,400.00                                    |
| UNB Study Research Coordinator             | \$ 112,589.28                                    |
| (4) Intervention Research Assistants       | \$ 119,172.41                                    |
| <b>Subtotal</b>                            | <b>\$ 521,921.69</b>                             |
| <b>B) Evaluation</b>                       |                                                  |
| Community Consultations                    |                                                  |
| Focus Groups                               |                                                  |
| Surveys                                    |                                                  |
| Venues                                     | \$ -                                             |
| Software                                   |                                                  |
| <b>Subtotal</b>                            | <b>\$ -</b>                                      |
| <b>C) Travel</b>                           |                                                  |
| Transportation                             |                                                  |
| Accommodation                              |                                                  |
| Meals and Incidentals                      |                                                  |
| Meeting Space                              | \$ -                                             |
| <b>Subtotal</b>                            | <b>\$ -</b>                                      |
| <b>D) Materials</b>                        |                                                  |

|                                  |    |                   |
|----------------------------------|----|-------------------|
| Office Supplies                  |    |                   |
| Project Materials                |    |                   |
| Printing                         | \$ | 1,000.00          |
| Postage                          | \$ | 1,000.00          |
| Other                            | \$ | -                 |
| <b>Subtotal</b>                  | \$ | <b>2,000.00</b>   |
| <b>E) Equipment</b>              |    |                   |
| Office Equipment                 | \$ | 1,000.00          |
| Computer                         | \$ | 10,500.00         |
| Furniture                        | \$ | 1,000.00          |
| Special Equipment                | \$ | 22,628.00         |
| Other                            |    |                   |
| <b>Subtotal</b>                  | \$ | <b>35,128.00</b>  |
| <b>F) Rent and Utilities</b>     |    |                   |
| Rent                             | \$ | -                 |
| Utilities                        | \$ | -                 |
| <b>Subtotal</b>                  | \$ | <b>-</b>          |
| <b>G) Other (specify)</b>        |    |                   |
| Training                         | \$ | -                 |
| Translation/ Interpretation Fees | \$ | -                 |
| Membership Fees                  | \$ | -                 |
| <b>Subtotal</b>                  | \$ | <b>-</b>          |
| <b>Total Cost</b>                |    |                   |
| <b>Total Budget</b>              | \$ | <b>559,049.69</b> |

APPENDIX H: NEUROPEAK DUAL TASK SOFTWARE - SAMPLES

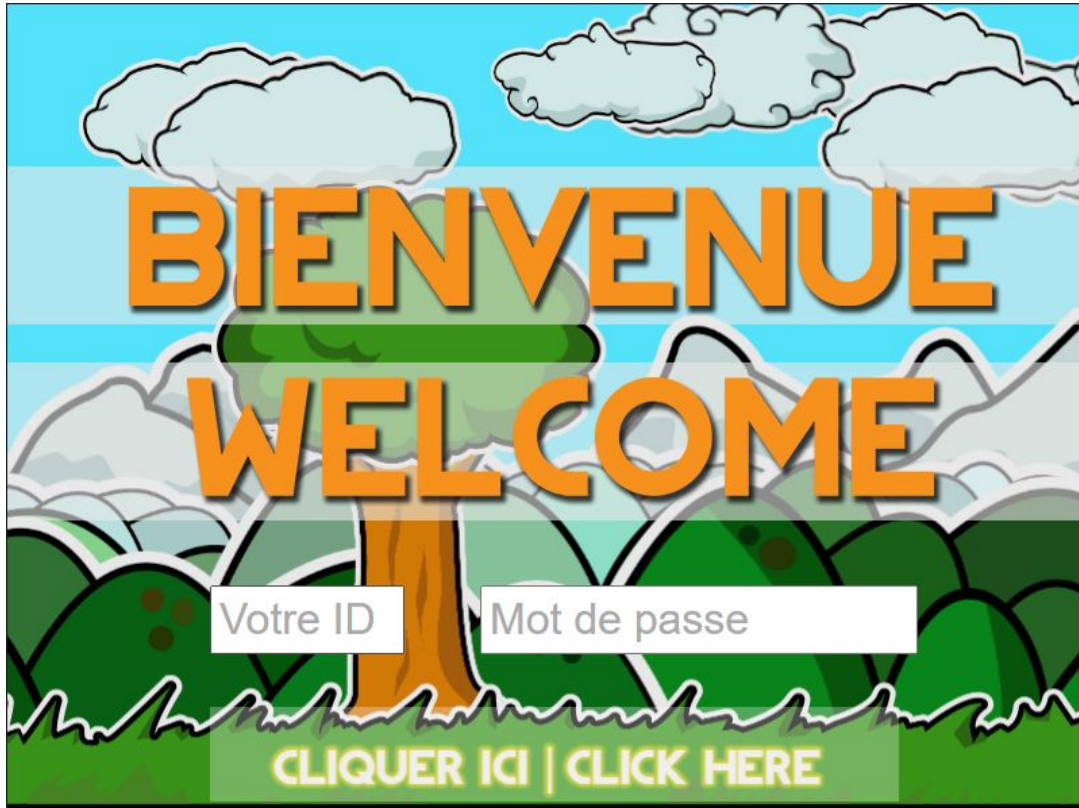

**HELLO PARTICIPANT 999!**

Are you ready for a new training session?  
 For any comments or questions, do not hesitate to contact us by clicking [here](#).

You have reached training session #3. Keep up the good work!

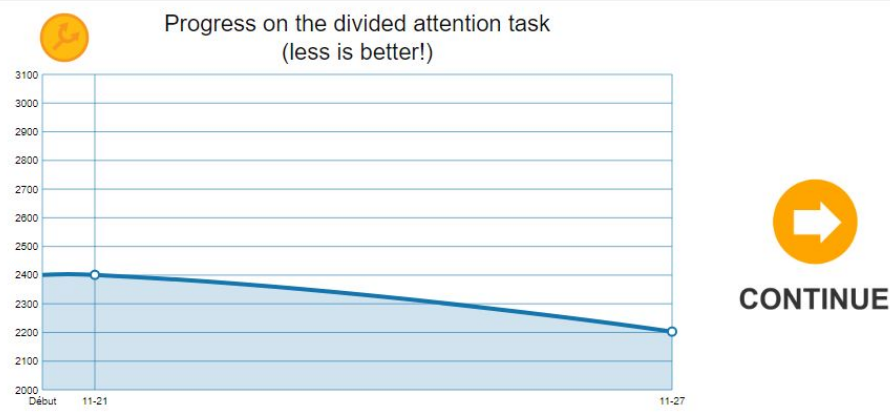

1  
2  
3  
4  
5  
6  
7  
8  
9  
10  
11  
12  
13  
14  
15  
16  
17  
18  
19  
20  
21  
22  
23  
24  
25  
26  
27  
28  
29  
30  
31  
32  
33  
34  
35  
36  
37  
38  
39  
40  
41  
42  
43  
44  
45  
46  
47  
48  
49  
50  
51  
52  
53  
54  
55  
56  
57  
58  
59  
60

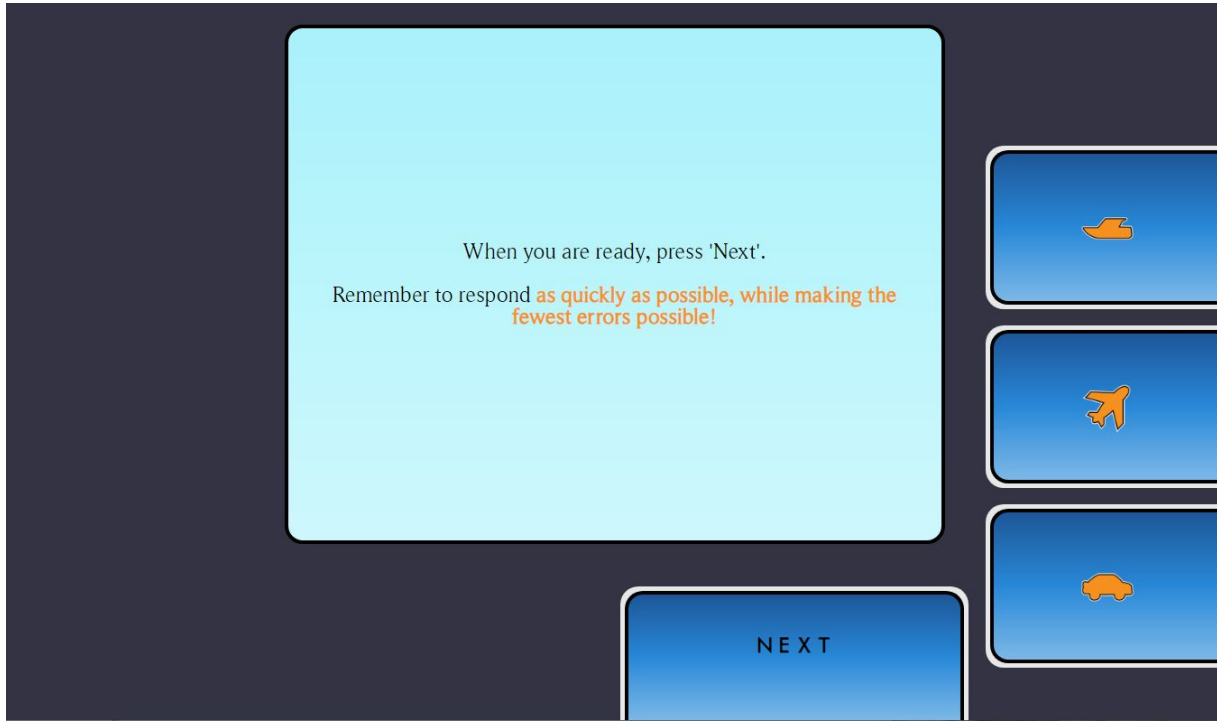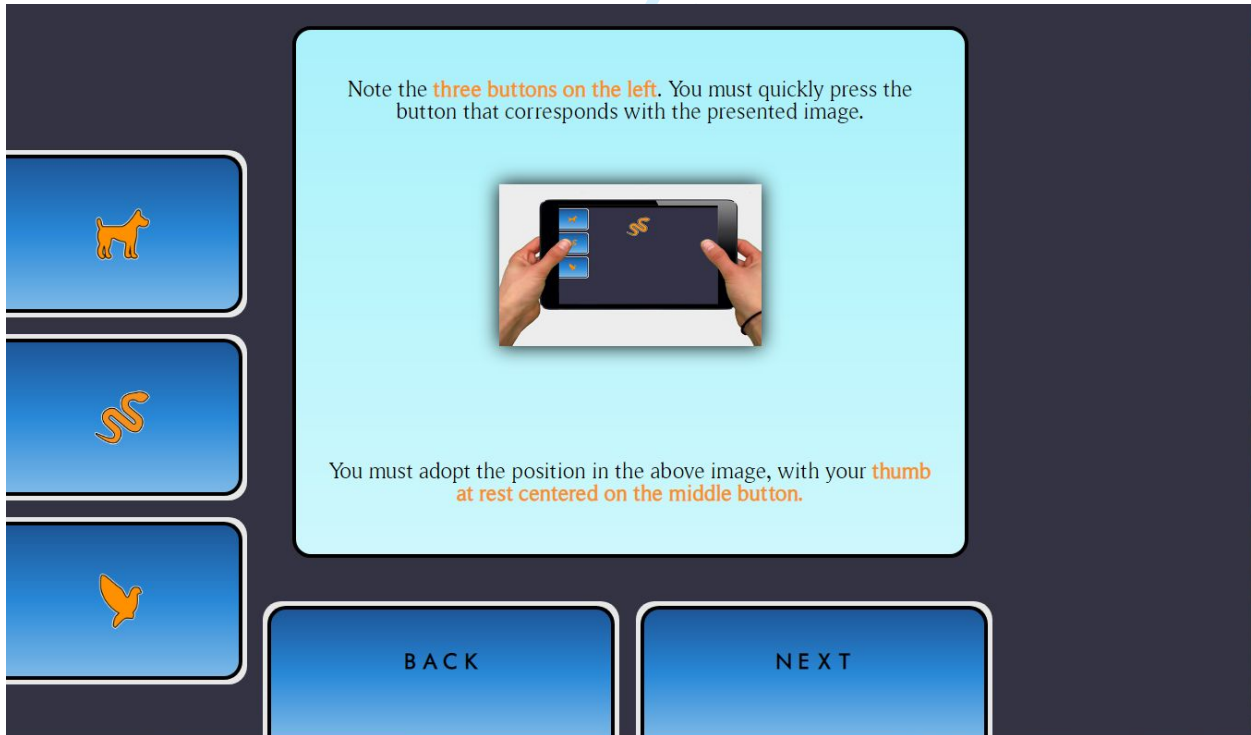

1  
2  
3  
4  
5  
6  
7  
8  
9  
10  
11  
12  
13  
14  
15  
16  
17  
18  
19  
20  
21  
22  
23  
24  
25  
26  
27  
28  
29  
30  
31  
32  
33  
34  
35  
36  
37  
38  
39  
40  
41  
42  
43  
44  
45  
46  
47  
48  
49  
50  
51  
52  
53  
54  
55  
56  
57  
58  
59  
60

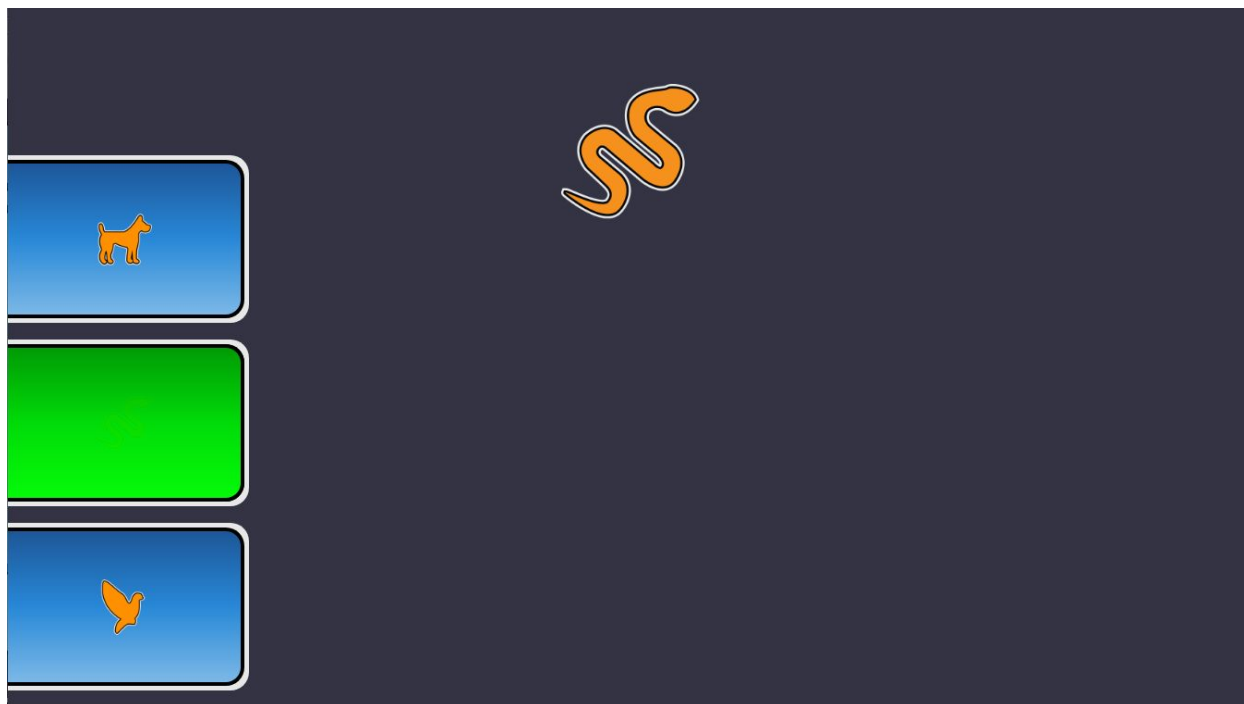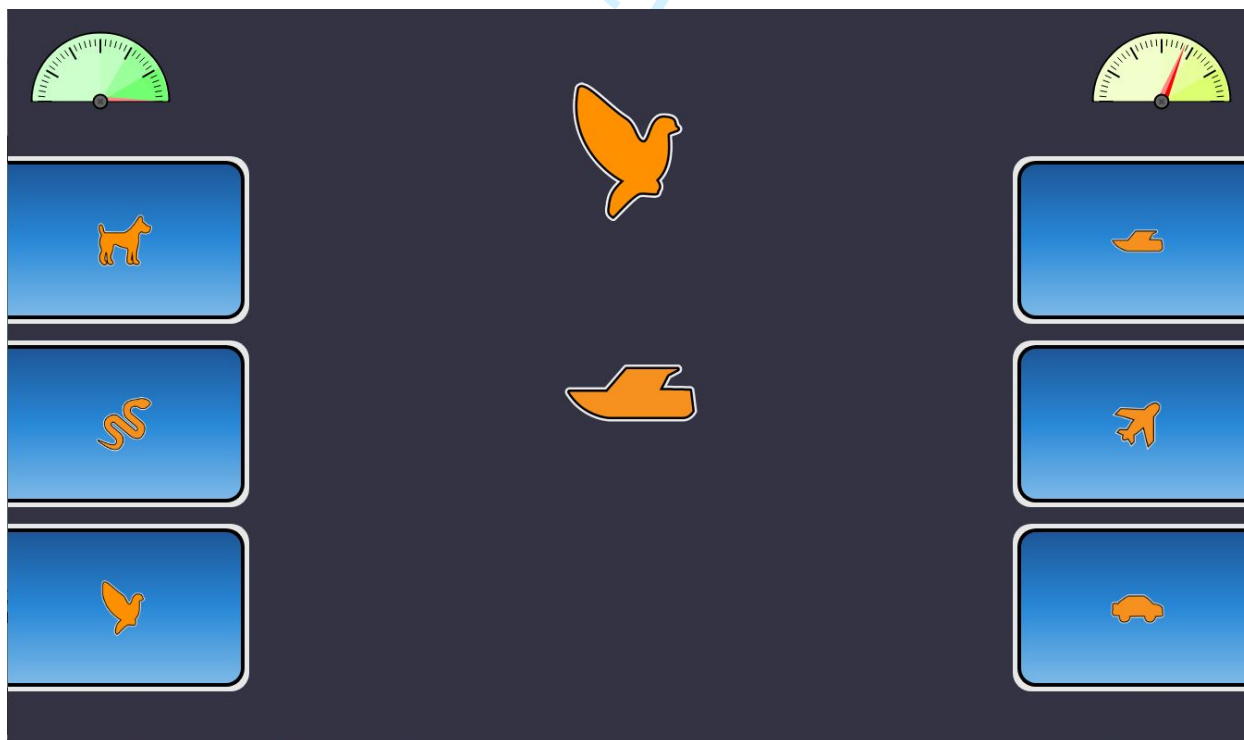

1 **APPENDIX I: PROTOCOL DEVIATION FORMS**  
 2  
 3

4 **Protocol Deviations Log**  
 5

| 6 <b>Subject ID</b> | 7 <b>Description of Protocol Deviation:</b> | 8 <b>Deviation Category*</b> | 9 <b>Deviation Code**</b> | 10 <b>Date Deviation Occurred:</b><br>(dd/mmm/yyyy) | 11 <b>Date REB Notified</b><br>(if applicable): | 12 <b>Principal Investigator's Signature</b> | 13 <b>Date Signed</b><br>(dd/mmm/yyyy) |
|---------------------|---------------------------------------------|------------------------------|---------------------------|-----------------------------------------------------|-------------------------------------------------|----------------------------------------------|----------------------------------------|
| 14                  |                                             |                              |                           |                                                     |                                                 |                                              |                                        |
| 15                  |                                             |                              |                           |                                                     |                                                 |                                              |                                        |
| 16                  |                                             |                              |                           |                                                     |                                                 |                                              |                                        |
| 17                  |                                             |                              |                           |                                                     |                                                 |                                              |                                        |
| 18                  |                                             |                              |                           |                                                     |                                                 |                                              |                                        |
| 19                  |                                             |                              |                           |                                                     |                                                 |                                              |                                        |
| 20                  |                                             |                              |                           |                                                     |                                                 |                                              |                                        |
| 21                  |                                             |                              |                           |                                                     |                                                 |                                              |                                        |
| 22                  |                                             |                              |                           |                                                     |                                                 |                                              |                                        |
| 23                  |                                             |                              |                           |                                                     |                                                 |                                              |                                        |
| 24                  |                                             |                              |                           |                                                     |                                                 |                                              |                                        |
| 25                  |                                             |                              |                           |                                                     |                                                 |                                              |                                        |
| 26                  |                                             |                              |                           |                                                     |                                                 |                                              |                                        |
| 27                  |                                             |                              |                           |                                                     |                                                 |                                              |                                        |
| 28                  |                                             |                              |                           |                                                     |                                                 |                                              |                                        |
| 29                  |                                             |                              |                           |                                                     |                                                 |                                              |                                        |
| 30                  |                                             |                              |                           |                                                     |                                                 |                                              |                                        |
| 31                  |                                             |                              |                           |                                                     |                                                 |                                              |                                        |
| 32                  |                                             |                              |                           |                                                     |                                                 |                                              |                                        |
| 33                  |                                             |                              |                           |                                                     |                                                 |                                              |                                        |
| 34                  |                                             |                              |                           |                                                     |                                                 |                                              |                                        |
| 35                  |                                             |                              |                           |                                                     |                                                 |                                              |                                        |
| 36                  |                                             |                              |                           |                                                     |                                                 |                                              |                                        |
| 37                  |                                             |                              |                           |                                                     |                                                 |                                              |                                        |
| 38                  |                                             |                              |                           |                                                     |                                                 |                                              |                                        |
| 39                  |                                             |                              |                           |                                                     |                                                 |                                              |                                        |
| 40                  |                                             |                              |                           |                                                     |                                                 |                                              |                                        |

For peer review only

**\*DEVIATION CATEGORIES:**

- A. Safety
- B. Informed Consent
- C. Eligibility
- D. Protocol implementation
- E. Other, specify in log

\*\*DEVIATION CODES: Numbers listed by the sample protocol deviations

Safety (Category A)

1. Not reporting an SAE within 24 hours
2. Laboratory tests not done
3. AE/SAE is not reported to REB
4. Other, specify in log

Informed Consent (Category B)

10. Failure to obtain informed consent
11. Consent form used was not current REB-approved version
12. Consent form does not include updates or information required by REB
13. Consent form missing

14. Consent form not signed and dated by participant
15. Consent form does not contain all required signatures
16. Other, specify in log

Eligibility (Category C)

20. Participant did not meet eligibility criterion
21. Randomization of an ineligible participant
22. Participant randomized prior to completing Baseline Assessment, etc.
23. Randomization and/or treatment of participant prior to REB approval of protocol
24. Other, specify in log

Protocol implementation (Category D)

30. Failure to keep REB approval up to date
31. Participant receives wrong treatment
32. Participant seen outside visit window
33. Use of unallowable concomitant treatments
34. Prescribed dosing outside protocol guidelines
35. Missed assessment
36. Missed visit
37. Other, specify in log



# Protocol Deviation Form (Descriptive)

1  
2  
3  
4  
5  
6  
7  
8  
9  
10  
11  
12  
13  
14  
15  
16  
17  
18  
19  
20  
21  
22  
23  
24  
25  
26  
27  
28  
29  
30  
31  
32  
33  
34  
35  
36  
37  
38  
39  
40  
41  
42  
43  
44  
45  
46  
47  
48  
49  
50  
51  
52  
53  
54  
55  
56  
57  
58  
59  
60

|                                                                                                                |  |              |                |
|----------------------------------------------------------------------------------------------------------------|--|--------------|----------------|
| <b>Subject ID:</b>                                                                                             |  | <b>Date:</b> | mm / dd / yyyy |
| <b>Description of Protocol Deviation:</b>                                                                      |  |              |                |
| <p style="color: lightblue; font-size: 2em; transform: rotate(-30deg); opacity: 0.5;">For peer review only</p> |  |              |                |
| <b>This form completed by:</b>                                                                                 |  |              |                |

## 16. REFERENCES

1. International AD. The Global Impact of Dementia: An analysis of prevalence, incidence, cost and trends. *The World Alzheimer Report 2015*. 2016.
2. The Comprehensive Assessment of Neurodegeneration and Dementia (COMPASS-ND) Study. <https://ccna-ccnv.ca/compass-nd-study/>. Published 2020. Accessed.
3. Lawton MP, Brody EM. Assessment of older people: self-maintaining and instrumental activities of daily living. *Gerontologist*. 1969;9(3):179-186.
4. Kurt S. Kirkpatrick Model: Four Levels of Learning Evaluation. *Educational Technology*. 2014.
5. Jutten RJ, Harrison J, Lee Meeuw Kjoer PR, et al. A novel cognitive-functional composite measure to detect changes in early Alzheimer's disease: Test-retest reliability and feasibility. *Alzheimers Dement (Amst)*. 2018;10:153-160.
6. Raghavan N, Samtani MN, Farnum M, et al. The ADAS-Cog revisited: novel composite scales based on ADAS-Cog to improve efficiency in MCI and early AD trials. *Alzheimers Dement*. 2013;9(1 Suppl):S21-31.
7. Fiatarone Singh MA, Gates N, Saigal N, et al. The Study of Mental and Resistance Training (SMART) study-resistance training and/or cognitive training in mild cognitive impairment: a randomized, double-blind, double-sham controlled trial. *J Am Med Dir Assoc*. 2014;15(12):873-880.
8. Suzuki T, Shimada H, Makizako H, et al. A randomized controlled trial of multicomponent exercise in older adults with mild cognitive impairment. *PLoS One*. 2013;8(4):e61483.
9. Yoshida K, Yamaoka Y, Eguchi Y, et al. Remote neuropsychological assessment of elderly Japanese population using the Alzheimer's Disease Assessment Scale: A validation study. *J Telemed Telecare*. 2020;26(7-8):482-487.
10. Ricker JH, Axelrod BN. Analysis of an Oral Paradigm for the Trail Making Test. *Assessment*. 1994;1(1):47-52.
11. Mack WJ, Freed DM, Williams BW, Henderson VW. Boston Naming Test: shortened versions for use in Alzheimer's disease. *J Gerontol*. 1992;47(3):P154-158.
12. Abikoff H, Alvir J, Hong G, et al. Logical memory subtest of the Wechsler Memory Scale: age and education norms and alternate-form reliability of two scoring systems. *J Clin Exp Neuropsychol*. 1987;9(4):435-448.
13. Delis DC, Kramer JH, Kaplan E, Holdnack J. Reliability and validity of the Delis-Kaplan Executive Function System: an update. *J Int Neuropsychol Soc*. 2004;10(2):301-303.

**Study Title: SYNERGIC@Home**

14. Rapp SR, Legault C, Espeland MA, et al. Validation of a cognitive assessment battery administered over the telephone. *J Am Geriatr Soc.* 2012;60(9):1616-1623.
15. Berrigan LI, Fisk JD, Walker LA, et al. Reliability of regression-based normative data for the oral symbol digit modalities test: an evaluation of demographic influences, construct validity, and impairment classification rates in multiple sclerosis samples. *Clin Neuropsychol.* 2014;28(2):281-299.
16. Carney CE, Buysse DJ, Ancoli-Israel S, et al. The consensus sleep diary: standardizing prospective sleep self-monitoring. *Sleep.* 2012;35(2):287-302.
17. Group SMIfSR, Williamson JD, Pajewski NM, et al. Effect of Intensive vs Standard Blood Pressure Control on Probable Dementia: A Randomized Clinical Trial. *JAMA.* 2019;321(6):553-561.
18. Livingston G, Sommerlad A, Orgeta V, et al. Dementia prevention, intervention, and care. *Lancet.* 2017;390(10113):2673-2734.
19. Yu JT, Xu W, Tan CC, et al. Evidence-based prevention of Alzheimer's disease: systematic review and meta-analysis of 243 observational prospective studies and 153 randomised controlled trials. *J Neurol Neurosurg Psychiatry.* 2020.
20. Livingston G, Huntley J, Sommerlad A, et al. Dementia prevention, intervention, and care: 2020 report of the Lancet Commission. *Lancet.* 2020;396(10248):413-446.
21. Montero-Odasso M, Ismail Z, Livingston G. One third of dementia cases can be prevented within the next 25 years by tackling risk factors. The case "for" and "against". *Alzheimers Res Ther.* 2020;12(1):81.
22. Montero-Odasso M, Almeida QJ, Burhan AM, et al. SYNERGIC TRIAL (SYNchronizing Exercises, Remedies in Gait and Cognition) a multi-Centre randomized controlled double blind trial to improve gait and cognition in mild cognitive impairment. *BMC Geriatr.* 2018;18(1):93.
23. M Montero Odasso QA, R Camicioli, K Li, T Liu-Ambrose, L Middleton, and L Bherer. PRELIMINARY RESULTS FROM THE SYNERGIC TRIAL: A MULTIMODAL INTERVENTION FOR MILD COGNITIVE IMPAIRMENT. *Innovation in Aging.* 2018;2(1):439-440.
24. Alzheimer Society of C. Report summary Prevalence and monetary costs of dementia in Canada (2016): a report by the Alzheimer Society of Canada. *Health Promot Chronic Dis Prev Can.* 2016;36(10):231-232.
25. Ostbye T, Crosse E. Net economic costs of dementia in Canada. *CMAJ.* 1994;151(10):1457-1464.
26. Takeda A, Loveman E, Clegg A, et al. A systematic review of the clinical effectiveness of donepezil, rivastigmine and galantamine on cognition, quality of life and adverse events in Alzheimer's disease. *Int J Geriatr Psychiatry.* 2006;21(1):17-28.

**Study Title: SYNERGIC@Home**

27. Albert MS, DeKosky ST, Dickson D, et al. The diagnosis of mild cognitive impairment due to Alzheimer's disease: recommendations from the National Institute on Aging-Alzheimer's Association workgroups on diagnostic guidelines for Alzheimer's disease. *Alzheimers Dement.* 2011;7(3):270-279.
28. Petersen RC. Clinical practice. Mild cognitive impairment. *N Engl J Med.* 2011;364(23):2227-2234.
29. Cheng ST, Chow PK, Song YQ, et al. Mental and physical activities delay cognitive decline in older persons with dementia. *Am J Geriatr Psychiatry.* 2014;22(1):63-74.
30. Bherer L, Erickson KI, Liu-Ambrose T. Physical exercise and brain functions in older adults. *J Aging Res.* 2013;2013:197326.
31. Liu-Ambrose T, Nagamatsu LS, Voss MW, Khan KM, Handy TC. Resistance training and functional plasticity of the aging brain: a 12-month randomized controlled trial. *Neurobiol Aging.* 2012;33(8):1690-1698.
32. Ohman H, Savikko N, Strandberg TE, Pitkala KH. Effect of physical exercise on cognitive performance in older adults with mild cognitive impairment or dementia: a systematic review. *Dement Geriatr Cogn Disord.* 2014;38(5-6):347-365.
33. Lautenschlager NT, Cox KL, Flicker L, et al. Effect of physical activity on cognitive function in older adults at risk for Alzheimer disease: a randomized trial. *JAMA.* 2008;300(9):1027-1037.
34. Colcombe S, Kramer AF. Fitness effects on the cognitive function of older adults: a meta-analytic study. *Psychol Sci.* 2003;14(2):125-130.
35. Langlois F, Vu TT, Chasse K, Dupuis G, Kergoat MJ, Bherer L. Benefits of physical exercise training on cognition and quality of life in frail older adults. *J Gerontol B Psychol Sci Soc Sci.* 2013;68(3):400-404.
36. Gates N, Fiatarone Singh MA, Sachdev PS, Valenzuela M. The effect of exercise training on cognitive function in older adults with mild cognitive impairment: a meta-analysis of randomized controlled trials. *Am J Geriatr Psychiatry.* 2013;21(11):1086-1097.
37. Li KZ, Roudaia E, Lussier M, Bherer L, Leroux A, McKinley PA. Benefits of cognitive dual-task training on balance performance in healthy older adults. *J Gerontol A Biol Sci Med Sci.* 2010;65(12):1344-1352.
38. Reijnders J, van Heugten C, van Boxtel M. Cognitive interventions in healthy older adults and people with mild cognitive impairment: a systematic review. *Ageing Res Rev.* 2013;12(1):263-275.
39. Ballesteros S, Prieto A, Mayas J, et al. Brain training with non-action video games enhances aspects of cognition in older adults: a randomized controlled trial. *Front Aging Neurosci.* 2014;6:277.

40. Chapman SB, Aslan S, Spence JS, et al. Neural mechanisms of brain plasticity with complex cognitive training in healthy seniors. *Cereb Cortex*. 2015;25(2):396-405.
41. Teixeira CVL, Ribeiro de Rezende TJ, Weiler M, et al. Cognitive and structural cerebral changes in amnesic mild cognitive impairment due to Alzheimer's disease after multicomponent training. *Alzheimers Dement (N Y)*. 2018;4:473-480.
42. Ballesteros S, Voelcker-Rehage C, Bherer L. Editorial: Cognitive and Brain Plasticity Induced by Physical Exercise, Cognitive Training, Video Games, and Combined Interventions. *Front Hum Neurosci*. 2018;12:169.
43. Ngandu T, Lehtisalo J, Solomon A, et al. A 2 year multidomain intervention of diet, exercise, cognitive training, and vascular risk monitoring versus control to prevent cognitive decline in at-risk elderly people (FINGER): a randomised controlled trial. *Lancet*. 2015;385(9984):2255-2263.
44. Lauenroth A, Ioannidis AE, Teichmann B. Influence of combined physical and cognitive training on cognition: a systematic review. *BMC Geriatr*. 2016;16:141.
45. Shah TMM, R.N. Synergistic Effects of Combined Physical Activity and Brain Training on Neurological Functions. In: *Physical Activity and the Aging Brain: Effects of Exercise on Neurological Function*. Academic Press; 2017:175-185.
46. Pothier K, Gagnon C, Fraser SA, et al. A comparison of the impact of physical exercise, cognitive training and combined intervention on spontaneous walking speed in older adults. *Aging Clin Exp Res*. 2018;30(8):921-925.
47. Lipardo DS, Aseron AMC, Kwan MM, Tsang WW. Effect of Exercise and Cognitive Training on Falls and Fall-Related Factors in Older Adults With Mild Cognitive Impairment: A Systematic Review. *Arch Phys Med Rehabil*. 2017;98(10):2079-2096.
48. Gauthier S, Reisberg B, Zaudig M, et al. Mild cognitive impairment. *Lancet*. 2006;367(9518):1262-1270.
49. Tan CH, Bonham LW, Fan CC, et al. Polygenic hazard score, amyloid deposition and Alzheimer's neurodegeneration. *Brain*. 2019;142(2):460-470.
50. Desikan RS, Fan CC, Wang Y, et al. Genetic assessment of age-associated Alzheimer disease risk: Development and validation of a polygenic hazard score. *PLoS Med*. 2017;14(3):e1002258.
51. El-Kotob R, Giangregorio LM. Pilot and feasibility studies in exercise, physical activity, or rehabilitation research. *Pilot Feasibility Stud*. 2018;4:137.
52. Calculate Your Body Mass Index. National Heart Lung and Blood Institute. [https://www.nhlbi.nih.gov/health/educational/lose\\_wt/BMI/bmi-m.htm](https://www.nhlbi.nih.gov/health/educational/lose_wt/BMI/bmi-m.htm). Accessed.
53. Get Active Questionnaire. In: (CSEP-PATH®) CSFEPPATFH, ed2017.

**Study Title: SYNERGIC@Home**

- 1
  - 2
  - 3
  - 4
  - 5
  - 6
  - 7
  - 8
  - 9
  - 10
  - 11
  - 12
  - 13
  - 14
  - 15
  - 16
  - 17
  - 18
  - 19
  - 20
  - 21
  - 22
  - 23
  - 24
  - 25
  - 26
  - 27
  - 28
  - 29
  - 30
  - 31
  - 32
  - 33
  - 34
  - 35
  - 36
  - 37
  - 38
  - 39
  - 40
  - 41
  - 42
  - 43
  - 44
  - 45
  - 46
  - 47
  - 48
  - 49
  - 50
  - 51
  - 52
  - 53
  - 54
  - 55
  - 56
  - 57
  - 58
  - 59
  - 60
54. Jessen F, Amariglio RE, van Boxtel M, et al. A conceptual framework for research on subjective cognitive decline in preclinical Alzheimer's disease. *Alzheimers Dement*. 2014;10(6):844-852.
55. Kurlowicz L, Wallace M. The Mini Mental State Examination (MMSE). *Director*. 1999;7(2):62.
56. Molloy DW, Alemayehu E, Roberts R. Reliability of a Standardized Mini-Mental State Examination compared with the traditional Mini-Mental State Examination. *Am J Psychiatry*. 1991;148(1):102-105.
57. Newkirk LA, Kim JM, Thompson JM, Tinklenberg JR, Yesavage JA, Taylor JL. Validation of a 26-point telephone version of the Mini-Mental State Examination. *J Geriatr Psychiatry Neurol*. 2004;17(2):81-87.
58. John KCPS. VIRTUAL APPROACHES TO COGNITIVE SCREENING DURING PANDEMICS. *Canadian Geriatrics Society Journal of CME*. 2020;10(1).
59. Nasreddine ZS, Phillips NA, Bedirian V, et al. The Montreal Cognitive Assessment, MoCA: a brief screening tool for mild cognitive impairment. *J Am Geriatr Soc*. 2005;53(4):695-699.
60. Chapman JE, Cadilhac DA, Gardner B, Ponsford J, Bhalla R, Stolwyk RJ. Comparing face-to-face and videoconference completion of the Montreal Cognitive Assessment (MoCA) in community-based survivors of stroke. *J Telemed Telecare*. 2019:1357633X19890788.
61. Morris JC. The Clinical Dementia Rating (CDR): current version and scoring rules. *Neurology*. 1993;43(11):2412-2414.
62. Esther Strauss EMSS, Otfried Spreen. Trail Making Tests. In: SE SO, ed. *A compendium of Neuropsychological Tests: Administration, norms and commentary*. New York: Oxford University Press; 1998:533-547.
63. Wechsler D. *Wechsler adult intelligence scale—Fourth Edition (WAIS—IV)*. Vol 22. San Antonio, TX: NCS Pearson; 2008.
64. Christodoulou G, Gennings C, Hupf J, et al. Telephone based cognitive-behavioral screening for frontotemporal changes in patients with amyotrophic lateral sclerosis (ALS). *Amyotroph Lateral Scler Frontotemporal Degener*. 2016;17(7-8):482-488.
65. Ryan JJ, Schnakenberg-Ott SD. Scoring reliability on the Wechsler Adult Intelligence Scale-Third Edition (WAIS-III). *Assessment*. 2003;10(2):151-159.
66. Buysse DJ, Reynolds CF, 3rd, Monk TH, Berman SR, Kupfer DJ. The Pittsburgh Sleep Quality Index: a new instrument for psychiatric practice and research. *Psychiatry Res*. 1989;28(2):193-213.
67. Martinez-Gonzalez MA, Garcia-Arellano A, Toledo E, et al. A 14-item Mediterranean diet assessment tool and obesity indexes among high-risk subjects: the PREDIMED trial. *PLoS One*. 2012;7(8):e43134.

- 1  
2  
3  
4  
5  
6  
7  
8  
9  
10  
11  
12  
13  
14  
15  
16  
17  
18  
19  
20  
21  
22  
23  
24  
25  
26  
27  
28  
29  
30  
31  
32  
33  
34  
35  
36  
37  
38  
39  
40  
41  
42  
43  
44  
45  
46  
47  
48  
49  
50  
51  
52  
53  
54  
55  
56  
57
68. al He. A short questionnaire for assessment of dietary vitamin D intake. *European Journal of Nutrition and Food Safety*. 2014;4:150-156.
  69. Washburn RA, Smith KW, Jette AM, Janney CA. The Physical Activity Scale for the Elderly (PASE): development and evaluation. *J Clin Epidemiol*. 1993;46(2):153-162.
  70. Stalvey B, Owsley, C., Sloane, M.E., Ball, K. The Life Space Questionnaire: A measure of the extent of mobility of older adults. *Journal of Applied Gerontology*. 1999;18:479-498.
  71. Rockwood K, Song X, MacKnight C, et al. A global clinical measure of fitness and frailty in elderly people. *CMAJ*. 2005;173(5):489-495.
  72. Lyons RA, Perry HM, Littlepage BN. Evidence for the validity of the Short-form 36 Questionnaire (SF-36) in an elderly population. *Age Ageing*. 1994;23(3):182-184.
  73. Spitzer RL, Kroenke K, Williams JB, Lowe B. A brief measure for assessing generalized anxiety disorder: the GAD-7. *Arch Intern Med*. 2006;166(10):1092-1097.
  74. Yesavage JA, Brink TL, Rose TL, et al. Development and validation of a geriatric depression screening scale: a preliminary report. *J Psychiatr Res*. 1982;17(1):37-49.
  75. Center NAsC. COVID-19 Impact Survey: Retrieved from <https://www.alz.washington.edu/>. June, 2020.
  76. Lepkowsky C, & Arndt,S. Functional assessment of currently employed technology scale (FACETS): Reliability and validity. *International Journal of Medical Science and Clinical Investigation*. 2018;5(09):4064-4068.
  77. Charles M. Lepkowsky SA. Functional Assessment of Currently Employed Technology Scale (FACETS): Reliability and Validity. *International Journal of Medical Science and Clinical Invention*. 2018;5(09):4064-4068.
  78. Charles M. Lepkowsky SA. Functional Assessment of Currently Employed Technology Scale (FACETS) 4.0: Update on a Brief Intake Instrument to Facilitate Treatment Planning and Communication with Patients. *International Journal of Medical Science and Clinical Invention*. 2019;7(5):4802-4809.
  79. Verghese J, Kuslansky G, Holtzer R, et al. Walking while talking: effect of task prioritization in the elderly. *Arch Phys Med Rehabil*. 2007;88(1):50-53.
  80. Stuck AK, Bachmann M, Fullemann P, Josephson KR, Stuck AE. Effect of testing procedures on gait speed measurement: A systematic review. *PLoS One*. 2020;15(6):e0234200.
  81. Montero-Odasso M, Casas A, Hansen KT, et al. Quantitative gait analysis under dual-task in older people with mild cognitive impairment: a reliability study. *J Neuroeng Rehabil*. 2009;6:35.

**Study Title: SYNERGIC@Home**

- 1  
2  
3  
4  
5  
6  
7  
8  
9  
10  
11  
12  
13  
14  
15  
16  
17  
18  
19  
20  
21  
22  
23  
24  
25  
26  
27  
28  
29  
30  
31  
32  
33  
34  
35  
36  
37  
38  
39  
40  
41  
42  
43  
44  
45  
46  
47  
48  
49  
50  
51  
52  
53  
54  
55  
56  
57  
58  
59  
60
82. Hittmair-Delazer M, Semenza C, Denes G. Concepts and facts in calculation. *Brain*. 1994;117 ( Pt 4):715-728.
83. Weiss EM, Siedentopf C, Hofer A, et al. Brain activation pattern during a verbal fluency test in healthy male and female volunteers: a functional magnetic resonance imaging study. *Neurosci Lett*. 2003;352(3):191-194.
84. Konig A, Klaming L, Pijl M, Demeurraux A, David R, Robert P. Objective measurement of gait parameters in healthy and cognitively impaired elderly using the dual-task paradigm. *Aging Clin Exp Res*. 2017;29(6):1181-1189.
85. Montero-Odasso MM, Sarquis-Adamson Y, Speechley M, et al. Association of Dual-Task Gait With Incident Dementia in Mild Cognitive Impairment: Results From the Gait and Brain Study. *JAMA Neurol*. 2017;74(7):857-865.
86. Montero-Odasso M, Oteng-Amoako A, Speechley M, et al. The motor signature of mild cognitive impairment: results from the gait and brain study. *J Gerontol A Biol Sci Med Sci*. 2014;69(11):1415-1421.
87. Tinetti ME, Baker DI, McAvay G, et al. A multifactorial intervention to reduce the risk of falling among elderly people living in the community. *N Engl J Med*. 1994;331(13):821-827.
88. Reychler G, Boucard E, Peran L, et al. One minute sit-to-stand test is an alternative to 6MWT to measure functional exercise performance in COPD patients. *Clin Respir J*. 2018;12(3):1247-1256.
89. Crook S, Busching G, Schultz K, et al. A multicentre validation of the 1-min sit-to-stand test in patients with COPD. *Eur Respir J*. 2017;49(3).
90. Legault C, Jennings JM, Katula JA, et al. Designing clinical trials for assessing the effects of cognitive training and physical activity interventions on cognitive outcomes: the Seniors Health and Activity Research Program Pilot (SHARP-P) study, a randomized controlled trial. *BMC Geriatr*. 2011;11:27.
91. Coelho FG, Andrade LP, Pedrosa RV, et al. Multimodal exercise intervention improves frontal cognitive functions and gait in Alzheimer's disease: a controlled trial. *Geriatr Gerontol Int*. 2013;13(1):198-203.
92. Liu-Ambrose T, Nagamatsu LS, Graf P, Beattie BL, Ashe MC, Handy TC. Resistance training and executive functions: a 12-month randomized controlled trial. *Arch Intern Med*. 2010;170(2):170-178.
93. Nagamatsu LS, Handy TC, Hsu CL, Voss M, Liu-Ambrose T. Resistance training promotes cognitive and functional brain plasticity in seniors with probable mild cognitive impairment. *Arch Intern Med*. 2012;172(8):666-668.
94. Schwenk M, Zieschang T, Oster P, Hauer K. Dual-task performances can be improved in patients with dementia: a randomized controlled trial. *Neurology*. 2010;74(24):1961-1968.



- 1  
2  
3 95. Silsupadol P, Shumway-Cook A, Lugade V, et al. Effects of single-task versus dual-task training on  
4 balance performance in older adults: a double-blind, randomized controlled trial. *Arch Phys Med*  
5 *Rehabil.* 2009;90(3):381-387.  
6  
7 96. Verghese J, Mahoney J, Ambrose AF, Wang C, Holtzer R. Effect of cognitive remediation on gait  
8 in sedentary seniors. *J Gerontol A Biol Sci Med Sci.* 2010;65(12):1338-1343.  
9  
10 97. You JH, Shetty A, Jones T, Shields K, Belay Y, Brown D. Effects of dual-task cognitive-gait  
11 intervention on memory and gait dynamics in older adults with a history of falls: a preliminary  
12 investigation. *NeuroRehabilitation.* 2009;24(2):193-198.  
13  
14 98. Bherer L, Kramer AF, Peterson MS, Colcombe S, Erickson K, Becic E. Training effects on dual-task  
15 performance: are there age-related differences in plasticity of attentional control? *Psychol*  
16 *Aging.* 2005;20(4):695-709.  
17  
18 99. Bherer L, Kramer AF, Peterson MS, Colcombe S, Erickson K, Becic E. Testing the limits of  
19 cognitive plasticity in older adults: application to attentional control. *Acta Psychol (Amst).*  
20 2006;123(3):261-278.  
21  
22 100. Bherer L, Kramer AF, Peterson MS, Colcombe S, Erickson K, Becic E. Transfer effects in task-set  
23 cost and dual-task cost after dual-task training in older and younger adults: further evidence for  
24 cognitive plasticity in attentional control in late adulthood. *Exp Aging Res.* 2008;34(3):188-219.  
25  
26 101. JW WJaC. *Mixed Methods: Integrating Quantitative and Qualitative Data Collection and Analysis*  
27 *While Studying Patient-Centered Medical Home Models.* Rockville, MD: AHRQ Publication No.13-  
28 0028-EF; February 2013.  
29  
30 102. Lambert SA, Abraham G, Inouye M. Towards clinical utility of polygenic risk scores. *Hum Mol*  
31 *Genet.* 2019;28(R2):R133-R142.  
32  
33 103. Petersen RC, Smith GE, Waring SC, Ivnik RJ, Tangalos EG, Kokmen E. Mild cognitive impairment:  
34 clinical characterization and outcome. *Arch Neurol.* 1999;56(3):303-308.  
35  
36 104. Camicioli R, Majumdar SR. Relationship between mild cognitive impairment and falls in older  
37 people with and without Parkinson's disease: 1-Year Prospective Cohort Study. *Gait Posture.*  
38 2010;32(1):87-91.  
39  
40 105. Davis JC, Best J, Hsu CL, Nagamatsu LS, Dao E, Liu-Ambrose T. Examining the effect of the  
41 relationship between falls and mild cognitive impairment on mobility and executive functions in  
42 community-dwelling older adults. *J Am Geriatr Soc.* 2015;63(3):590-593.  
43  
44 106. Sage MD, Almeida QJ. A positive influence of vision on motor symptoms during sensory  
45 attention focused exercise for Parkinson's disease. *Mov Disord.* 2010;25(1):64-69.  
46  
47 107. Sage MD, Almeida QJ. Symptom and gait changes after sensory attention focused exercise vs  
48 aerobic training in Parkinson's disease. *Mov Disord.* 2009;24(8):1132-1138.  
49  
50  
51  
52  
53  
54  
55  
56  
57

**Study Title: SYNERGIC@Home**

- 1  
2  
3  
4  
5  
6  
7  
8  
9  
10  
11  
12  
13  
14  
15  
16  
17  
18  
19  
20  
21  
22  
23  
24  
25  
26  
27  
28  
29  
30  
31  
32  
33  
34  
35  
36  
37  
38  
39  
40  
41  
42  
43  
44  
45  
46  
47  
48  
49  
50  
51  
52  
53  
54  
55  
56  
57  
58  
59  
60
108. Baker DW, Williams MV, Parker RM, Gazmararian JA, Nurss J. Development of a brief test to measure functional health literacy. *Patient Education and Counseling*. 1999;38(1):33-42. doi:10.1016/S0738-3991(98)00116
109. Chesser AK, Keene Woods N, Wipperman J, Wilson R, Dong F. Health Literacy Assessment of the STOFHLA: Paper Versus Electronic Administration Continuation Study. *Health Educ Behav*. 2014;41(1):19-24. doi:10.1177/109019811347742
110. Connor M, Mantwill S, Schulz PJ. Functional health literacy in Switzerland—Validation of a German, Italian, and French health literacy test. *Patient Education and Counseling*. 2013;90(1):12-17. doi:10.1016/j.pec.2012.08.018

# BMJ Open

**Protocol for SYNchronizing Exercises, Remedies in GaIt and Cognition at Home (SYNERGIC@Home): Feasibility of a home-based double-blind randomized controlled trial to improve gait and cognition in individuals at risk for dementia**

|                                 |                                                                                                                                                                                                                                                                                                                                                                                                                                                                                                                                                                                                                                                                                                                                                                                                                                                                                                                                                                                                                                                                                                                                                                                                                                                                                                                                                                                                                                                                                                                                                                                                                                                                                                                                                                                                                                                                                                      |
|---------------------------------|------------------------------------------------------------------------------------------------------------------------------------------------------------------------------------------------------------------------------------------------------------------------------------------------------------------------------------------------------------------------------------------------------------------------------------------------------------------------------------------------------------------------------------------------------------------------------------------------------------------------------------------------------------------------------------------------------------------------------------------------------------------------------------------------------------------------------------------------------------------------------------------------------------------------------------------------------------------------------------------------------------------------------------------------------------------------------------------------------------------------------------------------------------------------------------------------------------------------------------------------------------------------------------------------------------------------------------------------------------------------------------------------------------------------------------------------------------------------------------------------------------------------------------------------------------------------------------------------------------------------------------------------------------------------------------------------------------------------------------------------------------------------------------------------------------------------------------------------------------------------------------------------------|
| Journal:                        | <i>BMJ Open</i>                                                                                                                                                                                                                                                                                                                                                                                                                                                                                                                                                                                                                                                                                                                                                                                                                                                                                                                                                                                                                                                                                                                                                                                                                                                                                                                                                                                                                                                                                                                                                                                                                                                                                                                                                                                                                                                                                      |
| Manuscript ID                   | bmjopen-2021-059988.R1                                                                                                                                                                                                                                                                                                                                                                                                                                                                                                                                                                                                                                                                                                                                                                                                                                                                                                                                                                                                                                                                                                                                                                                                                                                                                                                                                                                                                                                                                                                                                                                                                                                                                                                                                                                                                                                                               |
| Article Type:                   | Protocol                                                                                                                                                                                                                                                                                                                                                                                                                                                                                                                                                                                                                                                                                                                                                                                                                                                                                                                                                                                                                                                                                                                                                                                                                                                                                                                                                                                                                                                                                                                                                                                                                                                                                                                                                                                                                                                                                             |
| Date Submitted by the Author:   | 01-Mar-2022                                                                                                                                                                                                                                                                                                                                                                                                                                                                                                                                                                                                                                                                                                                                                                                                                                                                                                                                                                                                                                                                                                                                                                                                                                                                                                                                                                                                                                                                                                                                                                                                                                                                                                                                                                                                                                                                                          |
| Complete List of Authors:       | <p>McGibbon, Chris; University of New Brunswick Fredericton Faculty of Kinesiology, ; University of New Brunswick Institute of Biomedical Engineering,</p> <p>Jarrett, Pam; Horizon Health Network, Geriatric Medicine ; Dalhousie University Faculty of Medicine</p> <p>Handrigan, Grant ; Universite de Moncton, School of Kinesiology and Recreation, Faculty of Health Sciences and Community Services</p> <p>Bouchard, Danielle; University of New Brunswick Fredericton Faculty of Kinesiology,</p> <p>Tranchant, Carole C.; Universite de Moncton, School of Food Science, Nutrition and Family Studies, Faculty of Health Sciences and Community Services</p> <p>Sexton, Andrew; University of New Brunswick Institute of Biomedical Engineering,</p> <p>Yetman, Linda; Horizon Health Network, Research Services</p> <p>Robinson, Bryn; Horizon Health Network, Research Services</p> <p>Crapoulet, Stephanie; Vitalite Health Network</p> <p>Chamard-Witkowski, Ludivine; Dr Georges-L-Dumont University Hospital Centre, Department of Neuroscience</p> <p>Liu-Ambrose, Teresa; The University of British Columbia, Department of Physical Therapy,</p> <p>Middleton, Laura; University of Waterloo, Kinesiology</p> <p>Almeida, Quincy; Wilfrid Laurier University Faculty of Science, Kinesiology and Physical Education</p> <p>Bherer, Louis; Université de Montréal, Department of Medicine</p> <p>Lim, Andrew; Sunnybrook Health Sciences Centre Neurology Division, Department of Medicine</p> <p>Speechley, Mark; University of Western Ontario, Epidemiology &amp; Biostatistics</p> <p>Kamkar, Nellie; Lawson Health Research Institute, Gait and Brain Laboratory</p> <p>Montero Odasso, Manuel; Lawson Health Research Institute, Gait and Brain Laboratory; Schulich School of Medicine and Dentistry, Department of Medicine (Geriatrics), University of Western Ontario</p> |
| <b>Primary Subject Heading</b>: | Geriatric medicine                                                                                                                                                                                                                                                                                                                                                                                                                                                                                                                                                                                                                                                                                                                                                                                                                                                                                                                                                                                                                                                                                                                                                                                                                                                                                                                                                                                                                                                                                                                                                                                                                                                                                                                                                                                                                                                                                   |

1  
2  
3  
4  
5  
6  
7  
8  
9  
10  
11  
12  
13  
14  
15  
16  
17  
18  
19  
20  
21  
22  
23  
24  
25  
26  
27  
28  
29  
30  
31  
32  
33  
34  
35  
36  
37  
38  
39  
40  
41  
42  
43  
44  
45  
46  
47  
48  
49  
50  
51  
52  
53  
54  
55  
56  
57  
58  
59  
60

|                            |                                                                                                                |
|----------------------------|----------------------------------------------------------------------------------------------------------------|
| Secondary Subject Heading: | Neurology, Rehabilitation medicine                                                                             |
| Keywords:                  | Dementia < NEUROLOGY, Physiology < NATURAL SCIENCE DISCIPLINES, GERIATRIC MEDICINE, Neuropathology < NEUROLOGY |
|                            |                                                                                                                |



1  
2  
3 1  
4  
5  
6 2  
7 3  
8 4  
9  
10 5  
11  
12  
13 6  
14 7  
15 8  
16 9  
17 10  
18  
19  
20  
21  
22  
23  
24  
25  
26  
27  
28  
29  
30  
31  
32  
33  
34  
35  
36  
37  
38  
39  
40  
41  
42  
43  
44  
45  
46  
47  
48  
49  
50  
51  
52  
53  
54  
55  
56  
57  
58  
59  
60

**Protocol for SYNchronizing Exercises, Remedies in Gait and Cognition at Home (SYNERGIC@Home): Feasibility of a home-based double-blind randomized controlled trial to improve gait and cognition in individuals at risk for dementia**

6 Chris A. McGibbon<sup>1,2</sup>, Pamela Jarrett<sup>3,4</sup>, Grant Handrigan<sup>5</sup>, Danielle R. Bouchard<sup>1</sup>, Carole C. Tranchant<sup>6</sup>, Andrew Sexton<sup>2</sup>, Linda Yetman<sup>7</sup>, Bryn Robinson<sup>7</sup>, Stephanie Crapoulet<sup>8</sup>, Ludivine Chamard-Witkowski<sup>9</sup>, Teresa Liu-Ambrose<sup>10</sup>, Laura Middleton<sup>11</sup>, Quincy J. Almeida<sup>12</sup>, Louis Bherer<sup>13</sup>, Andrew Lim<sup>14</sup>, Mark Speechley<sup>15</sup>, Nellie Kamkar<sup>16</sup>, Manuel Montero-Odasso<sup>16,17</sup>, and the Canadian Consortium on Neurodegeneration in Aging (CCNA), CAN-THUMBS UP Group.

11 **Author Affiliations:** <sup>1</sup>Faculty of Kinesiology, University of New Brunswick, Fredericton, New Brunswick, Canada; <sup>2</sup>Institute of Biomedical Engineering, University of New Brunswick, Fredericton, New Brunswick, Canada; <sup>3</sup>Department of Geriatric Medicine, Horizon Health Network, Saint John New Brunswick; <sup>4</sup>Dalhousie Medicine New Brunswick, Dalhousie University, Halifax, Nova Scotia, Canada; <sup>5</sup>School of Kinesiology and Recreation, Faculty of Health Sciences and Community Services, Université de Moncton, Moncton, New Brunswick, Canada; <sup>6</sup>School of Food Science, Nutrition and Family Studies, Faculty of Health Sciences and Community Services, Université de Moncton, Moncton, New Brunswick, Canada; <sup>7</sup>Research Services, Horizon Health Network, Saint John, New Brunswick; <sup>8</sup>Research Services, Vitalité Health Network, Moncton, New Brunswick; <sup>9</sup>Department of Neuroscience, Dr. Georges-L.-Dumont University Hospital Centre, Moncton, New Brunswick, Canada; <sup>10</sup>Department of Physical Therapy, University of British Columbia, Vancouver, British Columbia, Canada; <sup>11</sup>Department of Kinesiology and Health Sciences, Faculty of Health, University of Waterloo, Waterloo, Ontario, Canada; <sup>12</sup>Department of Kinesiology and Physical Education, Faculty of Science, Wilfred Laurier University, Waterloo, Ontario, Canada; <sup>13</sup>Department of Medicine, Faculty of Medicine, Université de Montréal, Québec, Canada; <sup>14</sup>Division of Neurology, Department of Medicine, Sunnybrook Health Sciences Centre, Toronto, Ontario, Canada; <sup>15</sup>Schulich School of Medicine and Dentistry, Department of Epidemiology and Biostatistics, University of Western Ontario, London, Ontario, Canada; <sup>16</sup>Gait and Brain Laboratory, Lawson Health Research Institute, Parkwood Hospital, London Ontario, Canada; <sup>17</sup>Schulich School of Medicine and Dentistry, Departments of Medicine (Geriatrics), University of Western Ontario, London, Ontario, Canada.

33 **Trial Registration:** ClinicalTrials.gov, NCT04997681

34 Corresponding author: Chris A. McGibbon, PhD. Email: [cmcgibb@unb.ca](mailto:cmcgibb@unb.ca)

**ABSTRACT**

**Introduction:** Physical exercise and cognitive training have the potential to enhance cognitive function and mobility in older adults at risk of Alzheimer’s disease and related dementia (ADRD), but little is known about the feasibility of delivering multi-domain interventions in home settings of older adults at risk of ADRD. This study aims to assess the feasibility of home-based delivery of exercise and cognitive interventions, and to evaluate the relationship between participants’ intervention preferences and their subsequent adherence. Secondary objectives include the effect of the interventions on ADRD risk factors including frailty, mobility, sleep, diet and psychological health.

**Methods and analysis:** The SYNERGIC@Home feasibility trial is a randomized control trial that follows a 2x2 factorial design, with a 16-week home-based intervention program (3 sessions per week) of physical exercises and cognitive training. Participants will be randomized in blocks of four to one of the following four arms: 1) combined exercise (aerobic and resistance) + cognitive training (NEUROPEAK™); 2) combined exercise + control cognitive training (web searching); 3) control exercise (balance and toning) + cognitive training; and 4) control exercise + control cognitive training. SYNERGIC@Home will be implemented through videoconferencing. Baseline and post-intervention assessments at 4 and 10 months follow-up will include measures of cognition, frailty, mobility, sleep, diet, and psychological health. Primary feasibility outcome is adherence to the interventions. Primary analytic outcome is the relationship between pre-allocation preference for a given intervention and subsequent adherence to the allocated intervention. A series of secondary analytic outcomes examining the potential effect of the individual and combined interventions on cognitive, mobility, and general well-being will be measured at baseline and follow-up.

**Ethics and dissemination:** Ethics approval was granted by the relevant Research Ethics Boards. Findings of the study will be presented to stakeholders and published in peer-reviewed journals and at provincial, national and international conferences.

**Keywords:** Exercise, cognitive training, remote delivery, videoconferencing, intervention preference, cognition, gait, dementia, home-based intervention program.

**66 Strengths and limitations of this study**

- 67 • This study is one of the first randomized control trials (RCTs) in Canada to establish the  
68 feasibility of fully remote recruitment, consent, assessment and delivery of bilingual,  
69 multi-domain, contactless interventions in the home for preventing dementia in at-risk  
70 older adults.
- 71 • This study will also quantify the relationship between participants' preferences for  
72 intervention type and their subsequent adherence to the interventions they were allocated  
73 to, which will provide evidence on whether alternate experimental designs that account  
74 for preference are scientifically justified.
- 75 • Consistent with a feasibility study, the sample is powered for feasibility outcomes rather  
76 than cognitive and health outcomes.
- 77 • The study intervention duration of 16-weeks is short but sufficient for evaluating  
78 feasibility and estimating effect sizes of cognitive and mobility outcomes using remote  
79 assessments.
- 80 • Elements of the study design are consistent with a full-scale double-blind RCT, including  
81 robust screening, randomization and allocation, comprehensive pre- and post-assessments  
82 with long-term follow-up assessment and semi-structured exit interview.

83

84

85

86

87

88

89

90

## 91 1 INTRODUCTION

92 In 2015, over 46 million people lived with Alzheimer’s disease and related dementias (ADRD)  
93 worldwide, with 1 new case appearing every 4.1 seconds.<sup>1</sup> The cost associated with these cases is  
94 over a trillion Canadian dollars.<sup>1-3</sup> There is no cure for dementia<sup>4</sup>. Recently, there has been a shift  
95 in interventional studies on ADRD to targeting pre-dementia states, such as mild cognitive  
96 impairment (MCI).<sup>5,6</sup> The SYNERGIC Trial (SYNchronizing Exercises, Remedies in GaIt and  
97 Cognition) implemented a multi-domain intervention study for individuals with MCI at sites  
98 across Canada<sup>7</sup> in both English and in French. The positive results of multidomain trials like  
99 SYNERGIC,<sup>8-10</sup> and the ensuing COVID-19 pandemic, have warranted investigation of a home-  
100 based version of the protocol that can reach a wider population of older adults.

101 The primary goal of the SYNERGIC@Home feasibility trial is to assess the feasibility of in-  
102 home delivery of exercise and cognitive training interventions for improving cognitive and  
103 physical functioning in older adults at risk for ADRD. Remote delivery of physical exercise  
104 interventions has been of significant interest for decades<sup>11,12</sup> but randomised controlled trials  
105 (RCT) almost always happen in clinical or academic environments. Building capacity for  
106 conducting assessments and interventions in the home of older adults is now critical for ensuring  
107 safety and accessibility, with the added benefit of reaching a wider and more diverse population  
108 of at-risk older adults<sup>13</sup> while reducing costs of program delivery.<sup>14</sup> Despite the convenience and  
109 lower participant burden (e.g., travel to and from clinic), adherence to interventions delivered  
110 remotely suffer the same threats to continued participation as traditional delivery methods,<sup>15</sup> such  
111 as negative outcome expectation<sup>16</sup> and time constraints.<sup>17</sup> Challenges arising from the use of  
112 computer and internet technology may not be significant barrier for younger adults<sup>18</sup> but little is  
113 known about how well an older population with or at risk of cognitive decline will adhere to a  
114 virtual delivery environment.

115 There is a growing interest in understanding the impact of preference on clinical trial  
116 participation<sup>19</sup> and novel designs have been proposed that incorporate preference (practitioner  
117 and/or patient)<sup>20,21</sup> that could improve accrual rates and generalizability of results. Although the  
118 concept of preference trials has been around since the 1990’s, these studies have focussed on trial  
119 designs and randomization schemes where preference is a treatment arm and not a measured  
120 outcome. Therefore, the analytic aim of this feasibility trial is to assess if participant’s pre-  
121 allocation preference for different types of interventions is related to their subsequent adherence  
122 to the interventions allocated to them. The landmark Finnish Geriatric Intervention Study to  
123 Prevent Cognitive Impairment and Disability (FINGER)<sup>10</sup> supports the efficacy of multidomain  
124 interventions, but to date no studies have examined if preference plays a role in adherence to  
125 those interventions. Our study will inform whether a future preference trial design is warranted  
126 for multi-domain brain health interventions.

### 127 1.1 Rationale for the SYNERGIC@HOME Interventions

128 Aerobic exercise (AE) and progressive resistance training (RT) have been shown to improve  
129 cognition, physical capacity and mobility in older adults.<sup>22-25</sup> Both AE<sup>26</sup> and RT<sup>27</sup> trials have  
130 reported positive results in improving cognitive performance, with effects lasting more than 3  
131 months.<sup>22,28</sup> Given the potential benefits of combining both types of exercise, we will deliver a



132 combined (AE+RT) progressive exercise program as our active exercise intervention. The  
133 control exercise will include balance and toning (BAT) exercises with equivalent time exposure  
134 but no progression. While evidence exists that BAT exercises can improve gait stability<sup>29</sup> and  
135 strength,<sup>30</sup> their effect on cognition is not demonstrated.<sup>31</sup>

136 The rationale for adding cognitive training stems from a plethora of recent research suggesting  
137 that improvements in brain plasticity occur after cognitive training,<sup>32-34</sup> and from the potential  
138 synergistic effect of combining it with physical exercise. Both simultaneous and sequential  
139 exercise and cognitive training have been shown efficacious for improving cognition<sup>35</sup> in older  
140 adults; SYNERGIC@Home adopts a sequential approach. Active cognitive training will be  
141 delivered using the NEUROPEAK™ program which consists of a dual-task cognitive training  
142 regimen designed by our group. NEUROPEAK™ has been shown to improve balance,<sup>36</sup>  
143 mobility,<sup>33</sup> and cognition<sup>37,38</sup> in healthy older adults. The control cognitive training will involve  
144 basic web searching and watching videos (WS+V), which is expected to have a minimal effect  
145 on cognition or mobility.

146 Finally, sixteen-week interventions of exercise and cognitive training has been conducted in  
147 previous studies in a clinical environment which has been shown to give significant and  
148 promising results,<sup>39,40</sup> however has not been tested virtually in a home setting.

## 149 1.2 Primary objectives and research questions

150 Our **primary feasibility objective** will measure **adherence to interventions** to answer the  
151 question: Will community-dwelling older adults adhere to a 16-week in-home, multidomain,  
152 supervised intervention program to improve their health and reduce their risk of ADRD?

153 To determine if affinity for any one intervention is an important factor in participants' adherence  
154 to the study interventions, we designed the Intervention Preference Questionnaire (see Appendix  
155 A) that will be used to answer the following questions:

- 156 • **Relation to adherence:** Is adherence correlated with receiving the active treatment they  
157 prefer as indicated by their pre-allocation preference ratings?
- 158 • **Preference attitudes:** Which intervention type (physical exercise or cognitive training)  
159 do most participants prefer over the other? What proportion of participants have no  
160 particular preference for either intervention?

161 Our **secondary feasibility objectives** will measure **recruitment rate, retention rate, trial**  
162 **experience, adverse events,** and **data loss** to answer the questions, respectively: How efficient  
163 is recruitment? Do participants stay in the trial for its duration? How satisfied are participants  
164 with the interventions? What adverse events are related to the intervention(s)? What is the rate of  
165 data loss when doing remote assessments?

166

## 167 2 METHODS AND ANALYSIS

## 168 2.1 Study design

169 SYNERGIC@Home is a home-based, double-blind, randomized controlled trial, with a four-arm  
170 full-factorial (2x2) design. It will be administered virtually through a secure online video  
171 conferencing platform. Block randomization by four will be used to allocate enrolled participants  
172 into one of four arms, with 16 participants in each arm (experimental conditions are in bold):

- 173 • Arm 1: **Combined exercise (AE+RT) + Cognitive training (NEUROPEAK™)**
- 174 • Arm 2: **Combined exercise (AE+RT)** + Control cognitive training (WS+V)
- 175 • Arm 3: Control exercise (BAT) + **Cognitive training (NEUROPEAK™)**
- 176 • Arm 4: Control exercise (BAT) + Control cognitive training (WS+V)

177 The experimental design is shown in Figure 1.

178 <Figure 1>

179 Assessments will occur at baseline (T0), 4mo (T4), and at 10mo follow-up (T10). The SPIRIT  
180 schedule of enrollment, interventions, and assessments is shown in Figure 2.

181 <Figure 2>

## 182 2.2 Participants and setting

183 Sixty-four older adults (age 60-90 years) at risk of developing ADRD, who live in the province  
184 of New Brunswick, Canada, and meet the inclusion and exclusion criteria will be recruited by  
185 study staff not involved in the participant's ongoing care. Participants will include francophone  
186 and anglophone and geographical recruitment areas will be both rural and urban. All intervention  
187 activity will take place in the participant's home.

## 188 2.3 Inclusion criteria

- 189 • Age 60 to 90 years
- 190 • Has a Family Physician/Nurse Practitioner
- 191 • Has internet access and basic technology ability (able to send and receive emails)
- 192 • Resides in their own home/apartment
- 193 • Has access to a home computer and/or a laptop computer device
- 194 • Self-reported levels of proficiency in English and/or French for reading, speaking and  
195 writing
- 196 • Able to comply with scheduled home-based assessments and interventions
- 197 • Able to ambulate at least 10 m independently with or without a walking aid
- 198 • At risk of developing dementia (see Table 1 and Appendix B):
  - 199 a) Mild Cognitive Impairment (MCI)
  - 200 b) Subjective Cognitive Impairment (SCI)

201 c) Cognitively Intact (CI) with 2 or more of the following risk factors: obesity,  
 202 hypertension, diabetes, cardiovascular disease, physical inactivity, first-degree  
 203 family history of dementia, dyslipidemia, poor sleep, and poor diet

- 204 • Deemed safe by the study physician to participate in exercise<sup>31</sup>
- 205 • Preserved activities of daily living (score of > 14/23 on the Lawton-Brody Instrumental  
 206 Activities of Daily Living (IADL) scale<sup>41</sup>).

207 <Table 1>

## 208 **2.4 Exclusion criteria**

- 209 • Diagnosis of dementia
- 210 • Living in Nursing Homes or Adult Residential Facilities.
- 211 • Serious underlying disease, which, in the opinion of the study physician would  
 212 compromise the participant's safety
- 213 • Surgery within the last two months or in the coming 12 months
- 214 • History of intracranial surgery
- 215 • Regularly takes benzodiazepines that would interfere with participation
- 216 • Presence of major depression, schizophrenia, severe anxiety or drug/alcohol abuse or  
 217 other medical illness that would prohibit safe participation
- 218 • Current Parkinsonism or any neurological disorder, active musculoskeletal disorders or  
 219 history of knee/hip replacement that affects gait
- 220 • Severe visual and/or auditory impairment
- 221 • Intention to enroll in other clinical trials during the same period
- 222 • Active participation in an organized and planned exercise program involving aerobic  
 223 and/or resistance training regimen in previous 6 months

## 224 **2.5 Recruitment and screening**

### 225 **2.5.1 Recruitment procedures**

226 Recruitment will include posters and posts on community and healthcare provider websites,  
 227 public and social media, physician offices, and paid newspaper advertisements.

### 228 **2.5.2 Screening and consenting procedures**

229 Consent will be obtained (see Appendix C) before any screening activities occur. The screening  
 230 visit will be done virtually using a secure online platform. Following the screening visit, a virtual  
 231 meeting with the study physician will occur for diagnostic validation and determination of  
 232 inclusion and exclusion criteria. Participants will then be enrolled and randomized. Participants  
 233 will indicate on the consent form if acquisition and retention of their saliva sample is permitted  
 234 for the Polygenic Hazard Score analysis.<sup>42,43</sup>

### 235 **2.5.3 Study Care Partners**

236 Each participant will be asked to identify a care partner (someone who knows them well) who  
237 can assist with some of the cognitive tests and assessments as needed. A care partner is not  
238 mandatory unless the participant has MCI or SCI. The care partner will be asked to provide  
239 informed consent as well (see Appendix D).

## 240 **2.6 Randomization and allocation**

241 Randomization will be conducted by research personnel not involved in screening, assessments  
242 or interventions using a simple excel formula that generates a random number within a sequence.  
243 A block randomization by four will be applied to ensure an appropriate balance between  
244 treatment arms. Permuted blocks will be employed to ensure balance over time.

## 245 **2.7 Blinding and debriefing**

246 To minimize bias, the study will be double-blinded. Research personnel performing the outcome  
247 assessments will be blinded to group allocation. Participants will also be blinded to which  
248 intervention they received and to study hypotheses. Only the designated research personnel  
249 delivering the interventions will know the treatment group that participants belong to and will  
250 not reveal the participants' allocation (unless it is medically necessary to do so) until the end of  
251 the trial.

## 252 **2.8 Early withdrawals**

253 Participants will be withdrawn from the study if they: 1) no longer wish to continue their  
254 participation in the study (voluntary withdrawal), or 2) in the opinion of one of the study  
255 physicians, it is medically necessary to withdraw the participant (medically necessary  
256 withdrawal).

### 257 **2.8.1 Voluntary withdrawal**

258 Participants who inform their Intervention Research Assistant (RA) that they wish to voluntarily  
259 withdraw will be asked by the Intervention Coordinator (to protect blinding) if they would be  
260 willing to continue their participation in either intervention on its own and return for their  
261 follow-up assessments. In this scenario, they will not be withdrawn from the study provided they  
262 agreed to at least the T4 assessment. Voluntary non-compliance will be captured by entering 0  
263 values in their intervention logs for the remainder of the weekly session(s) they withdrew from.

264 If the participant wishes to completely withdraw from the study, s/he will be asked to complete  
265 the Exit Survey and will subsequently be withdrawn from the study.

### 266 **2.8.2 Medically necessary withdrawal**

267 Medically necessary withdrawals may be required if participants experience unanticipated  
268 adverse events or changes in medication or health status, that in the judgement of a study  
269 physician, places the participant at risk of harm.

270 If it is deemed medically necessary to withdraw the participant, the Clinical Research  
271 Coordinator and/or Study Physician will meet with the participant to explain the reason(s) for  
272 being withdrawn from the study, and to inquire about the elements of the study that may have led  
273 to their change in health status (if applicable). If willing, the participant will be asked to  
274 complete the Exit Survey and will subsequently be withdrawn from the study.

## 275 **2.9 Interventions**

276 The interventions in this study were adapted from the original SYNERGIC trial,<sup>7</sup> and represent  
277 sequentially applied cognitive training and physical exercise. All participants will receive home-  
278 based intervention sessions of 90 minutes each three times per week for 16 weeks (48 sessions).  
279 Intervention research assistants (RA) trained and certified by the Canadian Society for Exercise  
280 Physiology (CSEP) will remotely supervise all sessions via a secure online video conferencing  
281 platform. Each participant will be assigned an RA that remains with them throughout the trial.  
282 Each session will consist of 20-25 minutes of cognitive training (NEUROPEAK™) or the  
283 control cognitive training (WS+V), followed by 50-60 minutes of exercise intervention (AE+RT)  
284 or control exercise (BAT). RAs will maintain an intervention log for each participant,  
285 documenting start and end times for each activity.

### 286 ***2.9.1 Active Exercise Intervention: Aerobic Exercise + Resistance Training (AE+RT)***

287 Participants receiving the AE+RT intervention will have home-based aerobic and resistance  
288 exercise (Table 2). The RA trainers will coach participants throughout the entire session and  
289 document their progress. The level of difficulty and progression for the AE+RT exercise will be  
290 tailored to their individual level with constant monitoring.

### 291 ***2.9.2 Control Exercise Intervention: Balance and Toning (BAT)***

292 Participants receiving the BAT control exercise will have home-based balance and toning  
293 exercises (Table 3). The format of the BAT session including the duration of activities and the  
294 amount of coaching will mirror that of the AE+RT session except the exercises will be devoted  
295 to improving muscle tone, balance and flexibility. Resistant load and number of repetitions will  
296 *not* progress during the trial.

### 297 ***2.9.3 Cognitive Training Intervention: NEUROPEAK™***

298 Participants assigned to the active cognitive intervention will first receive training on how to use  
299 NEUROPEAK™ on a tablet computer provided by the study (for uniformity). For this study a  
300 custom-written program consisting of a dual-task training program will be used<sup>44-46</sup> that requires  
301 participants to maintain and prepare for many response alternatives (working memory) and to  
302 share attention between two concurrent tasks (divided attention). Difficulty and progression of  
303 cognitive training is tailored to their individual functioning level and performance.

### 304 ***2.9.4 Control Cognitive Intervention: Web Search and Video (WS+V)***

Participants assigned to the control cognitive training will received home-based sessions that alternate between two different tasks: web searching for tourist sites and video watching. For the touristic web searching, participants will be required to find hotels, touristic places, and restaurants of their own preference in a city assigned by the RA (a new city will be selected each session). For the video watching, participants will view an educational video about nature and will be asked several questions about it.

## 2.10 Assessment Outcomes

All feasibility objectives are consistent with current recommendations on conducting feasibility trials.<sup>47</sup>

### 2.10.1 Primary Feasibility Outcome

- **Intervention Adherence:** Defined as the percent of all intervention sessions attended of the total planned sessions per participant (48-2=46 allowing for 2 missed sessions). To account for partial sessions each intervention session will be treated as a fractional measure: number of minutes training/scheduled session minutes, where scheduled minutes are 50min for exercise interventions and 20min for cognitive interventions.

### 2.10.2 Secondary Feasibility Outcomes

- **Recruitment Rate:** Defined as the total percent of enrolled participants relative to number of people screened for eligibility.
- **Retention Rate:** Defined as the total percent of enrolled participants who continue throughout the trial and participate in outcomes assessments. Enrollment retention is the % of enrolled participants who complete T4 assessment, and follow-up retention is the % of those who complete the follow-up T10 assessment.
- **Trial Experience:** A mixed methods approach will be used to explore participant experience after the trial using one-on-one interviews with a sub-sample (purposive sampling, up to 5 per arm=20 to reach saturation). All participants will be invited to complete an Exit Survey about their experience.
- **Adverse Events (AEs):** Relationship between AEs severity and relation to trial.
- **Data Loss:** Defined as data lost due to technical failures resulting in data loss include problems with electronic equipment or internet communications, personnel errors such as issuing improperly configured equipment, scheduling errors, and omitting assessments, and participant non-compliance such as omitting responses on surveys or declining assessments.

### 2.10.3 Primary Analytic Outcomes

**Intervention Preference:** The primary analytic goal of SYNERGIC@Home is to assess the relationship between participants' adherence to the interventions and their affinity for each intervention going into the trial, as well as other questions about preference. All participants will be given the IPQ at T0, prior to randomization.

342 The IPQ asks about their affinity for the offered interventions by quantifying interest level and  
343 preferences for the interventions. We will explain to participants that their responses on the  
344 questionnaire will not in any way influence the intervention group they will be randomly  
345 assigned to.

#### 346 ***2.10.4 Secondary Analytic Outcomes***

347 Various cognitive and psychological tests will be administered as part of a neuropsychological  
348 test battery, as well as gait, mobility, sleep, diet and biological markers (please see Figure 2 for a  
349 fuller list).

### 350 **2.11 Safety evaluation**

351 All adverse events (AEs) and serious AEs (SAEs) that occur between consent and completion of  
352 the study will be reported. All AEs and SAEs will be monitored to determine the outcome or  
353 until the study physician and/or appropriate research personnel considers it justifiable to  
354 terminate follow-up. An SAE will be defined as an event that results in death, is life threatening,  
355 requires hospitalization or results in persistent significant disability. AEs will be classified as  
356 mild, moderate, or severe. The relationship of the AE and SAE to study procedure will be  
357 determined and classified as not related, unlikely, possible, probable, or definite. All AEs and  
358 SAEs will be reported to the Safety and Data Monitoring Committee and REBs as required.

### 359 **2.12 Sample size**

360 Power analysis was conducted using G\*Power 3.1 based on our primary analytic goal of  
361 assessing the relationship between intervention preference and subsequent adherence to the  
362 interventions. Specifically (see 2.13.2 below), we plan on examining correlations among  
363 continuous variables with one-tailed analyses at  $\alpha = .05$  for two pairs of variables (equivalent to a  
364 two-tailed test at  $\alpha = .1$ , to account for both intervention types). To achieve a power of .8 we  
365 would require 48 participants. Assuming a 25% loss, a total of sixty-four participants will be  
366 enrolled.

### 367 **2.13 Statistical analysis**

368 All calculations will be made using the Statistical Package for the Social Sciences (SPSS version  
369 23.0, IBM Inc., Chicago, IL) and Stata (Stata Statistical Software: Release 14, StataCorp LP,  
370 College Station, TX).

371 Descriptive statistics for demographic and baseline characteristics will be provided with means  
372 and standard deviations, or medians and the interquartile range where appropriate, for continuous  
373 characteristics and frequencies and percentages for categorical variables.

#### 374 ***2.13.1 Feasibility outcomes***

375 Adherence to the interventions will be analyzed using a one-sample t-test that will test the null  
376 hypothesis that participants complete 50% of their scheduled intervention time. This test will be

377 used to determine if the adherence is superior to that hypothesized (feasibility target is 75%) or  
 378 inferior to that hypothesized (questionable feasibility is significantly <50%).

379 Secondary feasibility outcomes will be analyzed using non-parametric Chi-square tests. Target  
 380 enrollment retention (75%) and follow-up retention (56%) will be tested against observed  
 381 frequencies using a Chi-square goodness-of-fit test. This test will be used to determine if the  
 382 achieved distribution of eligible participants is similar to that hypothesized, superior to that  
 383 hypothesized or inferior to that hypothesized. Adverse events will be analyzed using a Chi-  
 384 square cross-tabulation analysis between AEs severity and AEs relation-to-trial. We will use this  
 385 analysis to test the hypothesis that there is a relationship between AEs severity and being in the  
 386 trial. Furthermore, we will stratify the sample by treatment arm and use a Chi-square goodness-  
 387 of-fit test to determine if AEs are distributed differently across treatment arms against the null  
 388 hypothesis of an even distribution (no relation to treatment arm).

### 389 **2.13.2 Analytic outcomes**

390 Intervention preference will be analyzed by transforming a set of variables:

- 391 • **Interest in the Interventions:** Question 1 in the IPQ rates participant's interest in each  
 392 intervention independently: exercise (**INT\_EX**) and cognitive training (**INT\_CT**), on a  
 393 0-10 scale.
- 394 • **Intervention Preference:** The second question rates their relative preference for either  
 395 intervention. This will generate a single variable that gives the relative preference (-2 to 2  
 396 scale), **PR**, where negative scores and positive scores indicate a preference for exercise or  
 397 cognitive training, respectively.
- 398 • **Intervention Allocated:** The treatment arms can be represented by two dummy (0,1)  
 399 variables for exercise (**EX\_ARM**) and cognitive (**CT\_ARM**) where 1=active treatment  
 400 and 0=control treatment.
- 401 • **Adherence to Interventions:** Adherence to the interventions at the end of the trial, for  
 402 exercise (**AD\_EX**) and cognitive training (**AD\_CT**), as well as overall **AD**, are  
 403 continuous scale variables.

404 **What is the relationship between adherence and intervention interest?** We will correlate  
 405 interest level for each intervention with adherence rates calculated from trial logs, using Pearson  
 406 correlation coefficient ( $\rho_{X,Y}$ ) with a one-tailed alpha of .05. The intervention is powered for  
 407 testing this hypothesis (see 2.12).

408  $H_0: \rho_{X,Y} = 0$ ,  $H_1: \rho_{X,Y} > 0$ , where  $X=INT\_EX$  and  $Y=AD\_EX$

409  $H_0: \rho_{X,Y} = 0$ ,  $H_1: \rho_{X,Y} > 0$ , where  $X=INT\_CT$  and  $Y=AD\_CT$

410 Rejection of the null hypothesis for either test will allow us to conclude that interest level in the  
 411 intervention type prior to the trial explains a significant amount of variance in adherence to the  
 412 trial.



1  
2  
3 413 **Do participants adhere better if they receive the active treatments they prefer?** Because  
4 414 some participants will be randomly assigned to the active intervention that matches their  
5 415 preference and others will not, we will transform the **PR** score into a signed logical **PR\_MET** (-  
6 416 1=preference not met, 0=no preference, +1=preference met) according to what intervention  
7 417 (**EX\_ARM** and/or **CT\_ARM**) they were allocated to. We will test the hypothesis that

8  
9  
10 418  $H_0: \rho_{X,Y} = 0$ ,  $H_1: \rho_{X,Y} \neq 0$ , where  $X=PR\_MET$  and  $Y=AD$

11  
12 419 Rejection of the null hypothesis ( $p < .05$ ) will allow us to conclude that adherence to the  
13 420 interventions is significantly influenced by receiving the active intervention they prefer.

14  
15  
16 421 **How do cognitive and mobility outcomes change as a result of the interventions?** Finally,  
17 422 intention-to-treat (ITT) analysis of cognitive and mobility outcomes with a general linear model  
18 423 or linear mixed model approach will be used to measure intervention effects, and we will  
19 424 estimate effect size based on Cohen's descriptors 0.2 = small; 0.5 = moderate; 0.8 = large for  
20 425 cognitive and mobility outcomes listed in Figure 2.

## 23 426 **2.14 Data management and monitoring**

24  
25 427 All electronic data will be stored on a secure platform at the lead university site. Paper copies of  
26 428 assessment forms will be stored in locked cabinets located at the workplaces of remote study  
27 429 research staff, and then transferred to the participating hospital site. Deidentified copies of the  
28 430 data will also be stored on a secure server called LORIS (Longitudinal Online Research and  
29 431 Imaging System) at the McGill Centre for Integrative Neuroscience, McGill University,  
30 432 Montreal, Quebec. All data will be double entered for data quality monitoring. Assessments at  
31 433 T0, T4, and T10 will be video and audio recorded. In addition, a subset of three intervention  
32 434 sessions will be selected to be video recorded per participant for quality control. The video and  
33 435 audio recordings will be deleted once the data have been validated and released by LORIS.

34  
35  
36  
37 436 There will be a Data Safety and Monitoring Committee chaired by an independent person not  
38 437 related to the study and will be comprised of the principal investigators, key research staff and  
39 438 researchers, an independent physician and two community representatives (anglophone and  
40 439 francophone). They will review all AEs, SAEs, protocol deviations, progress of the research, and  
41 440 audit study procedures if needed. Protocol amendments will be reported to this committee. All  
42 441 information related to adverse events, protocol amendments, and protocol deviations will be  
43 442 reported to the appropriate Research Ethics Boards.

## 44 443 **2.15. Access to data**

45  
46  
47  
48 444 Access to and analyses of study data stored in LORIS may be granted to qualified persons 12  
49 445 months after the principal paper answering primary research questions are published. Such  
50 446 requests will be made via email to the Canadian Consortium on Neurodegeneration in Aging  
51 447 [ccna.admin@ladydavis.ca] or via the LORIS Data Access Module. The full protocol and  
52 448 relevant statistical code will also be made available through LORIS.

## 53 449 **2.16 Participant and public involvement**

## SYNERGIC@Home feasibility trial

1  
2  
3 450 The SYNERGIC@Home feasibility study offers older adults and their families a unique  
4 451 opportunity to participate in a fully remote bilingual (French and English) RCT from their home.  
5 452 Participants will be invited to share their experience through questionnaires upon completion of  
6 453 the study as well as through individual semi-structured interviews. Participants will be able to  
7 454 provide direct feedback on trial improvement strategies, which could be implemented in future  
8 455 studies.

## 11 456 **2.17 Ethics and dissemination**

### 13 457 ***2.17.1 Research Ethics Approvals***

16 458 This study is conducted in compliance with International Conference on Harmonization of Good  
17 459 Clinical Practice (ICH-GCP) and all applicable regulatory requirements. SYNERGIC@Home  
18 460 has undergone review and approval from the Research Ethics Committees/Boards of: Horizon  
19 461 Health Network (#2020-2954); Vitalité Health Network (#2020-35), University of New  
20 462 Brunswick (#2020-168), and Université de Moncton (#2021-049). Protocol modifications will be  
21 463 approved by all relevant boards prior to implementation of the changes.

### 24 464 ***2.17.2 Dissemination Plan and Authorship***

26 465 Results of the study will be published in peer-reviewed journals, and presented to local  
27 466 stakeholders, and at provincial, national and international conferences. In accordance with the  
28 467 International Committee of Medical Journal Editors (ICMJE) standards, authorship of  
29 468 publications resulting from this study should accurately reflect the academic contribution of  
30 469 individuals to the design and implementation of the trial, analysis of the data and preparation of  
31 470 the manuscript. No researcher shall include identifiable personal health information in any  
32 471 publication or presentation.

35 472

## 38 473 **3 DISCUSSION**

40 474 Older adults at risk for ADRD have incident rates of related risk factors several times higher than  
41 475 their cognitively healthy counterparts.<sup>48</sup> Additionally, these individuals at risk for ADRD have an  
42 476 increased risk of falling and mobility decline<sup>49,50</sup> Physical exercise and cognitive training are  
43 477 emerging as promising non-pharmacological interventions to enhance mobility and cognitive  
44 478 functioning in older adults, especially in pre-dementia states. These interventions have been  
45 479 tested separately, with positive results for physical exercise and cognitive training in improving  
46 480 cognitive function.<sup>9,22,24,27,51</sup> The preliminary success of the original SYNERGIC program and  
47 481 similar combined interventions have illustrated the promising nature of non-pharmacological  
48 482 exercise interventions and cognitive training to enhance cognition for older adults at risk of  
49 483 developing ADRD.<sup>7,52-54</sup>

53 484 To our knowledge, this is the first study investigating the feasibility of conducting an entirely  
54 485 virtual, home-based, combined exercise and cognitive training intervention program for older  
55 486 adults at risk for ADRD.

### 3.1 Significance of establishing feasibility

Establishing the feasibility of conducting a virtual, home-based, multidomain intervention has the potential to inform other researchers on the logistics of designing remote intervention programs. If successful, the methodology and procedures tested in this feasibility trial could set the standard for a new platform in which participants are no longer restricted to intervention studies conducted in a common physical space.

### 3.2 Significance of examining intervention preference

Establishing if preference bias plays a role in which interventions older adults at risk of ADRD will adhere to is expected to provide unique insights into multidomain trial adherence, and will inform the design of future larger RCTs if it is found warranted to control for such bias using a preference design.<sup>20</sup>

### 3.3 Significance of secondary outcomes

We expect that the combined active exercise and cognitive training arms will have the greatest improvement (or least decline) of cognitive and mobility outcomes, followed by those who receive one active treatment, and finally those receiving both control treatments having the least improvement (or greatest decline). If successful, the combined interventions will further demonstrate a delay in their progression to dementia, warranting a larger RCT.

### 3.4 Benefits of interventions

Mechanistically, AE and RT exercises can provoke a cascade of biochemical, physiological, and structural changes in the brain including increases in blood flow, neurotrophic factor release, neurogenesis, immune system efficacy and metabolism. These effects of exercise could combat inflammatory processes and the atrophy of brain structures often associated with aging and ADRD<sup>32,34</sup>. Mechanisms suggested involve modulation of insulin-like growth factor-1 and insulin sensitivity, decreasing inflammation, enhancing release of brain-derived neurotrophic factor pathways, and even a decrease in brain amyloid.<sup>27,55,56</sup> Combined exercise interventions have also shown increased brain volume and muscle mass in older adults.<sup>57</sup> Furthermore, cognitive training has also been shown to improve overall cognition.<sup>37,38</sup> Individuals who practiced monitoring of two tasks at the same time on computer devices have presented with improved connectivity between prefrontal and temporal cortices, areas known to be important for executive functioning and memory, when compared to control participants.<sup>34</sup>

### 3.5 Strengths and concluding remarks

To our knowledge, this fully remote RCT is the first to test the feasibility of implementing, in two official languages, a combined physical exercise program with cognitive training to improve cognition and mobility in community-dwelling older adults at risk for ADRD. We will also establish the extent to which measuring participant preference for a given intervention is related to subsequent adherence. We believe that this will inform other researchers and scholars on

## SYNERGIC@Home feasibility trial

523 whether the costs and efforts associated with tailoring interventions in future studies to match  
524 participant preferences are worthwhile.

525 In conclusion, SYNERGIC@Home will build capacity for future research RCT designs using  
526 home-based interventions in older adults at risk for ADRD.

527

528 <end of main body>

529 **Acknowledgements:** We acknowledge the significant contributions of CCNA CAN-THUMBS  
530 UP Group Co-Principal Investigators: Howard Chertkow, Sylvie Belleville, Howard Feldman,  
531 Manuel Montero-Odasso, Haakon Nygaard; and Steering Committee members: Danielle Alcock,  
532 Nicole Anderson, Sarah Banks, Paul Brewster, Senny Chan, Marc Cuesta, Samir Das, Carol  
533 Evans, Guylaine Ferland, Tati Herold, Scott Hofer, Inbal Itzhak, Diane Jacobs, Pam Jarrett,  
534 Nellie Kamkar, Andrew Lim, Jody-Lynn Lupo, Lisa Madlensky, Chris McGibbon, Karen  
535 Messer, Zia Mohades, Carolyn Revta, Julie Robillard, Penny Slack, Eric Smith, Mark Speechley,  
536 Jennifer Walker, Jingjing Zou. This program was made possible by the participation of the  
537 Citizen Advisory Group, research students, support staff and other special groups.

538 **Collaborators:** Canadian Consortium on Neurodegeneration in Aging (CCNA), and Canadian  
539 Therapeutic Platform Trial for Multidomain Interventions to Prevent Dementia (CAN-THUMBS  
540 UP).

541 **Contributors:** All authors have read and approved of the final manuscript. CAM and PJ are the  
542 co-lead authors and contributed to the conception and development of the protocol and writing  
543 the manuscript. GH, DB, and CCT contributed to the conception and development of the  
544 interventions and writing the manuscript. AS, LY, BR, SC, NK and LW contributed to the  
545 development of the protocol and writing the manuscript. MS contributed to the study design and  
546 analysis. MMO conceived of the SYNERGIC program and various elements of the interventions  
547 and assessments were developed by TLA, LM, QA, LB and AL.

548 **Funding:** This work is supported by the Healthy Seniors Pilot Project (funding application  
549 C0042, January 2020 – October 2022), funded through the Government of New Brunswick and  
550 the Public Health Agency of Canada.

551 The Canadian Consortium on Neurodegeneration in Aging is supported by a grant from the  
552 Canadian Institutes of Health Research with additional funding from several partners. A  
553 substantial component of this funding for the CAN-THUMBS UP program derives from the  
554 Alzheimer's Society of Canada CCNA partnership.

555 **Competing interests:** None declared.

556 **Patient consent for publication:** Not required.

**Supplemental material:** This content has been supplied by the author(s). It has not been vetted by BMJ Publishing Group Limited (BMJ) and may not have been peer-reviewed. Any opinions or recommendations discussed are solely those of the author(s) and are not endorsed by BMJ. BMJ disclaims all liability and responsibility arising from any reliance placed on the content. Where the content includes any translated material, BMJ does not warrant the accuracy and reliability of the translations (including but not limited to local regulations, clinical guidelines, terminology, drug names and drug dosages), and is not responsible for any error and/or omissions arising from translation and adaptation or otherwise.

**Open access:** This is an open access article distributed in accordance with the Creative Commons Attribution Non Commercial (CC BY-NC 4.0) license, which permits others to distribute, remix, adapt, build upon this work non-commercially, and license their derivative works on different terms, provided the original work is properly cited, appropriate credit is given, any changes made indicated, and the use is non-commercial. See: <http://creativecommons.org/licenses/by-nc/4.0/>.

**ORCID ID:** Chris A. McGibbon <https://orcid.org/0000-0001-7849-7895>; Grant Handrigan <https://orcid.org/0000-0001-7793-5371>; Carole C. Tranchant <https://orcid.org/0000-0002-2026-819X>

## References

1. Alzheimer Disease International. The Global Impact of Dementia: An analysis of prevalence, incidence, cost and trends. *The World Alzheimer Report*. 2016.
2. Alzheimer Society of Canada Report Summary. Prevalence and monetary costs of dementia in Canada (2016): a report by the Alzheimer Society of Canada. *Health Promot Chronic Dis Prev Can*. 2016;36(10):231-232.
3. Ostbye T, Crosse E. Net economic costs of dementia in Canada. *CMAJ*. 1994;151(10):1457-1464.
4. Takeda A, Loveman E, Clegg A, et al. A systematic review of the clinical effectiveness of donepezil, rivastigmine and galantamine on cognition, quality of life and adverse events in Alzheimer's disease. *Int J Geriatr Psychiatry*. 2006;21(1):17-28.
5. Albert MS, DeKosky ST, Dickson D, et al. The diagnosis of mild cognitive impairment due to Alzheimer's disease: recommendations from the National Institute on Aging-Alzheimer's Association workgroups on diagnostic guidelines for Alzheimer's disease. *Alzheimers Dement*. 2011;7(3):270-279.
6. Petersen RC. Clinical practice. Mild cognitive impairment. *N Engl J Med*. 2011;364(23):2227-2234.
7. Montero-Odasso M, Almeida QJ, Burhan AM, et al. SYNERGIC TRIAL (SYNchronizing Exercises, Remedies in Gait and Cognition) a multi-Centre randomized controlled double blind trial to improve gait and cognition in mild cognitive impairment. *BMC Geriatr*. 2018;18(1):93.

- 1  
2  
3 596 8. Teixeira CVL, Ribeiro de Rezende TJ, Weiler M, et al. Cognitive and structural cerebral  
4 597 changes in amnesic mild cognitive impairment due to Alzheimer's disease after  
5 598 multicomponent training. *Alzheimers Dement (N Y)*. 2018;4:473-480.
- 6 599 9. Ballesteros S, Voelcker-Rehage C, Bherer L. Editorial: Cognitive and Brain Plasticity  
7 600 Induced by Physical Exercise, Cognitive Training, Video Games, and Combined  
8 601 Interventions. *Front Hum Neurosci*. 2018;12:169.
- 9 602 10. Ngandu T, Lehtisalo J, Solomon A, et al. A 2 year multidomain intervention of diet,  
10 603 exercise, cognitive training, and vascular risk monitoring versus control to prevent  
11 604 cognitive decline in at-risk elderly people (FINGER): a randomised controlled trial.  
12 605 *Lancet*. 2015;385(9984):2255-2263.
- 13 606 11. Norman GJ, Zabinski MF, Adams MA, Rosenberg DE, Yaroch AL, Atienza AA. A  
14 607 review of eHealth interventions for physical activity and dietary behavior change. *Am J*  
15 608 *Prev Med*. 2007;33(4):336-345.
- 16 609 12. Hillsdon M, Foster C, Thorogood M. Interventions for promoting physical activity.  
17 610 *Cochrane Database Syst Rev*. 2005(1):CD003180.
- 18 611 13. Jong M, Mendez I, Jong R. Enhancing access to care in northern rural communities via  
19 612 telehealth. *Int J Circumpolar Health*. 2019;78(2):1554174.
- 20 613 14. Maddison R, Rawstorn JC, Stewart RAH, et al. Effects and costs of real-time cardiac  
21 614 telerehabilitation: randomised controlled non-inferiority trial. *Heart*. 2019;105(2):122-  
22 615 129.
- 23 616 15. Johnson NA, Ewald B, Plotnikoff RC, et al. Predictors of adherence to a physical activity  
24 617 counseling intervention delivered by exercise physiologists: secondary analysis of the  
25 618 NewCOACH trial data. *Patient Prefer Adherence*. 2018;12:2537-2543.
- 26 619 16. Clark RE, McArthur C, Papaioannou A, et al. "I do not have time. Is there a handout I  
27 620 can use?": combining physicians' needs and behavior change theory to put physical  
28 621 activity evidence into practice. *Osteoporos Int*. 2017;28(6):1953-1963.
- 29 622 17. Choi J, Lee M, Lee JK, Kang D, Choi JY. Correlates associated with participation in  
30 623 physical activity among adults: a systematic review of reviews and update. *BMC Public*  
31 624 *Health*. 2017;17(1):356.
- 32 625 18. Torriani-Pasin C, Palma G, Makhoul MP, et al. Adherence Rate, Barriers to Attend,  
33 626 Safety, and Overall Experience of a Remote Physical Exercise Program During the  
34 627 COVID-19 Pandemic for Individuals After Stroke. *Front Psychol*. 2021;12:647883.
- 35 628 19. Corbett MS, Watson J, Eastwood A. Randomised trials comparing different healthcare  
36 629 settings: an exploratory review of the impact of pre-trial preferences on participation, and  
37 630 discussion of other methodological challenges. *BMC Health Serv Res*. 2016;16(1):589.
- 38 631 20. Walter SD, Turner RM, Macaskill P, McCaffery KJ, Irwig L. Estimation of treatment  
39 632 preference effects in clinical trials when some participants are indifferent to treatment  
40 633 choice. *BMC Med Res Methodol*. 2017;17(1):29.
- 41 634 21. Sessler DI, Myles PS. Novel Clinical Trial Designs to Improve the Efficiency of  
42 635 Research. *Anesthesiology*. 2020;132(1):69-81.
- 43 636 22. Bherer L, Erickson KI, Liu-Ambrose T. Physical exercise and brain functions in older  
44 637 adults. *J Aging Res*. 2013;2013:197326.
- 45 638 23. Liu-Ambrose T, Nagamatsu LS, Voss MW, Khan KM, Handy TC. Resistance training  
46 639 and functional plasticity of the aging brain: a 12-month randomized controlled trial.  
47 640 *Neurobiol Aging*. 2012;33(8):1690-1698.

- 1  
2  
3 641 24. Ohman H, Savikko N, Strandberg TE, Pitkala KH. Effect of physical exercise on  
4 642 cognitive performance in older adults with mild cognitive impairment or dementia: a  
5 643 systematic review. *Dement Geriatr Cogn Disord*. 2014;38(5-6):347-365.  
6 644 25. Lautenschlager NT, Cox KL, Flicker L, et al. Effect of physical activity on cognitive  
7 645 function in older adults at risk for Alzheimer disease: a randomized trial. *JAMA*.  
8 646 2008;300(9):1027-1037.  
9 647 26. Colcombe S, Kramer AF. Fitness effects on the cognitive function of older adults: a  
10 648 meta-analytic study. *Psychol Sci*. 2003;14(2):125-130.  
11 649 27. Langlois F, Vu TT, Chasse K, Dupuis G, Kergoat MJ, Bherer L. Benefits of physical  
12 650 exercise training on cognition and quality of life in frail older adults. *J Gerontol B*  
13 651 *Psychol Sci Soc Sci*. 2013;68(3):400-404.  
14 652 28. Gates N, Fiatarone Singh MA, Sachdev PS, Valenzuela M. The effect of exercise training  
15 653 on cognitive function in older adults with mild cognitive impairment: a meta-analysis of  
16 654 randomized controlled trials. *Am J Geriatr Psychiatry*. 2013;21(11):1086-1097.  
17 655 29. Choi JH, Kim NJ. The effects of balance training and ankle training on the gait of elderly  
18 656 people who have fallen. *J Phys Ther Sci*. 2015;27(1):139-142.  
19 657 30. McAuley E, Wojcicki TR, Learmonth YC, et al. Effects of a DVD-delivered exercise  
20 658 intervention on physical function in older adults with multiple sclerosis: A pilot  
21 659 randomized controlled trial. *Mult Scler J Exp Transl Clin*. 2015;1:2055217315584838.  
22 660 31. Yogev-Seligmann G, Eisenstein T, Ash E, et al. Neurocognitive Plasticity Is Associated  
23 661 with Cardiorespiratory Fitness Following Physical Exercise in Older Adults with  
24 662 Amnesic Mild Cognitive Impairment. *J Alzheimers Dis*. 2021;81(1):91-112.  
25 663 32. Reijnders J, van Heugten C, van Boxtel M. Cognitive interventions in healthy older  
26 664 adults and people with mild cognitive impairment: a systematic review. *Ageing Res Rev*.  
27 665 2013;12(1):263-275.  
28 666 33. Ballesteros S, Prieto A, Mayas J, et al. Brain training with non-action video games  
29 667 enhances aspects of cognition in older adults: a randomized controlled trial. *Front Aging*  
30 668 *Neurosci*. 2014;6:277.  
31 669 34. Chapman SB, Aslan S, Spence JS, et al. Neural mechanisms of brain plasticity with  
32 670 complex cognitive training in healthy seniors. *Cereb Cortex*. 2015;25(2):396-405.  
33 671 35. Gavelin HM, Dong C, Minkov R, et al. Combined physical and cognitive training for  
34 672 older adults with and without cognitive impairment: A systematic review and network  
35 673 meta-analysis of randomized controlled trials. *Ageing Res Rev*. 2021;66:101232.  
36 674 36. Li KZ, Roudaia E, Lussier M, Bherer L, Leroux A, McKinley PA. Benefits of cognitive  
37 675 dual-task training on balance performance in healthy older adults. *J Gerontol A Biol Sci*  
38 676 *Med Sci*. 2010;65(12):1344-1352.  
39 677 37. Lampit A, Hallock H, Valenzuela M. Computerized cognitive training in cognitively  
40 678 healthy older adults: a systematic review and meta-analysis of effect modifiers. *PLoS*  
41 679 *Med*. 2014;11(11):e1001756.  
42 680 38. Weng W, Liang J, Xue J, et al. The Transfer Effects of Cognitive Training on Working  
43 681 Memory Among Chinese Older Adults With Mild Cognitive Impairment: A Randomized  
44 682 Controlled Trial. *Front Aging Neurosci*. 2019;11:212.  
45 683 39. Legault C, Jennings JM, Katula JA, et al. Designing clinical trials for assessing the  
46 684 effects of cognitive training and physical activity interventions on cognitive outcomes:  
47 685 the Seniors Health and Activity Research Program Pilot (SHARP-P) study, a randomized  
48 686 controlled trial. *BMC Geriatr*. 2011;11:27.

- 1  
2  
3 687 40. Coelho FG, Andrade LP, Pedroso RV, et al. Multimodal exercise intervention improves  
4 688 frontal cognitive functions and gait in Alzheimer's disease: a controlled trial. *Geriatr*  
5 689 *Gerontol Int.* 2013;13(1):198-203.
- 6 690 41. Lawton MP, Brody EM. Assessment of older people: self-maintaining and instrumental  
7 691 activities of daily living. *Gerontologist.* 1969;9(3):179-186.
- 8 692 42. Desikan RS, Fan CC, Wang Y, et al. Genetic assessment of age-associated Alzheimer  
9 693 disease risk: Development and validation of a polygenic hazard score. *PLoS Med.*  
10 694 2017;14(3):e1002258.
- 11 695 43. Tan CH, Bonham LW, Fan CC, et al. Polygenic hazard score, amyloid deposition and  
12 696 Alzheimer's neurodegeneration. *Brain.* 2019;142(2):460-470.
- 13 697 44. Bherer L, Kramer AF, Peterson MS, Colcombe S, Erickson K, Becic E. Training effects  
14 698 on dual-task performance: are there age-related differences in plasticity of attentional  
15 699 control? *Psychol Aging.* 2005;20(4):695-709.
- 16 700 45. Bherer L, Kramer AF, Peterson MS, Colcombe S, Erickson K, Becic E. Testing the limits  
17 701 of cognitive plasticity in older adults: application to attentional control. *Acta Psychol*  
18 702 *(Amst).* 2006;123(3):261-278.
- 19 703 46. Bherer L, Kramer AF, Peterson MS, Colcombe S, Erickson K, Becic E. Transfer effects  
20 704 in task-set cost and dual-task cost after dual-task training in older and younger adults:  
21 705 further evidence for cognitive plasticity in attentional control in late adulthood. *Exp*  
22 706 *Aging Res.* 2008;34(3):188-219.
- 23 707 47. El-Kotob R, Giangregorio LM. Pilot and feasibility studies in exercise, physical activity,  
24 708 or rehabilitation research. *Pilot Feasibility Stud.* 2018;4:137.
- 25 709 48. Petersen RC, Smith GE, Waring SC, Ivnik RJ, Tangalos EG, Kokmen E. Mild cognitive  
26 710 impairment: clinical characterization and outcome. *Arch Neurol.* 1999;56(3):303-308.
- 27 711 49. Camicioli R, Majumdar SR. Relationship between mild cognitive impairment and falls in  
28 712 older people with and without Parkinson's disease: 1-Year Prospective Cohort Study.  
29 713 *Gait Posture.* 2010;32(1):87-91.
- 30 714 50. Davis JC, Best J, Hsu CL, Nagamatsu LS, Dao E, Liu-Ambrose T. Examining the effect  
31 715 of the relationship between falls and mild cognitive impairment on mobility and  
32 716 executive functions in community-dwelling older adults. *J Am Geriatr Soc.*  
33 717 2015;63(3):590-593.
- 34 718 51. Pothier K, Gagnon C, Fraser SA, et al. A comparison of the impact of physical exercise,  
35 719 cognitive training and combined intervention on spontaneous walking speed in older  
36 720 adults. *Aging Clin Exp Res.* 2018;30(8):921-925.
- 37 721 52. Montero-Odasso M, Ismail Z, Livingston G. One third of dementia cases can be  
38 722 prevented within the next 25 years by tackling risk factors. The case "for" and "against".  
39 723 *Alzheimers Res Ther.* 2020;12(1):81.
- 40 724 53. M Montero Odasso QA, R Camicioli, K Li, T Liu-Ambrose, L Middleton, and L Bherer.  
41 725 Preliminary results from the SYNERGIC trial: A multimodal intervention for mild  
42 726 cognitive impairment. *Innovation in Aging.* 2018;2(1):439-440.
- 43 727 54. Cheng ST, Chow PK, Song YQ, et al. Mental and physical activities delay cognitive  
44 728 decline in older persons with dementia. *Am J Geriatr Psychiatry.* 2014;22(1):63-74.
- 45 729 55. Sage MD, Almeida QJ. Symptom and gait changes after sensory attention focused  
46 730 exercise vs aerobic training in Parkinson's disease. *Mov Disord.* 2009;24(8):1132-1138.
- 47 731 56. Sage MD, Almeida QJ. A positive influence of vision on motor symptoms during sensory  
48 732 attention focused exercise for Parkinson's disease. *Mov Disord.* 2010;25(1):64-69.
- 49  
50  
51  
52  
53  
54  
55  
56  
57  
58  
59  
60



- 1  
2  
3 733 57. Nagamatsu LS, Handy TC, Hsu CL, Voss M, Liu-Ambrose T. Resistance training  
4 734 promotes cognitive and functional brain plasticity in seniors with probable mild cognitive  
5 735 impairment. *Arch Intern Med.* 2012;172(8):666-668.  
6 736 58. The Comprehensive Assessment of Neurodegeneration and Dementia (COMPASS-ND)  
7 737 Study. <https://ccna-ccnv.ca/compass-nd-study/>. Published 2020. Accessed.  
8 738 59. Jessen F, Amariglio RE, van Boxtel M, et al. A conceptual framework for research on  
9 739 subjective cognitive decline in preclinical Alzheimer's disease. *Alzheimers Dement.*  
10 740 2014;10(6):844-852.

13  
14 741

15  
16 742

For peer review only

743 **Table 1.** Canadian Consortium on Neurodegeneration in Aging (CCNA) Criteria for Cognitively  
 744 Intact with risk factors, and Subjective and Mild Cognitive Impairment from COMPASS-ND<sup>58</sup>

| Group                                                     | Core Diagnostic Criteria                                                                                                                                                                 | Operationalized as                                                                                                                                                                                                                                                                                                                                                                                                              |
|-----------------------------------------------------------|------------------------------------------------------------------------------------------------------------------------------------------------------------------------------------------|---------------------------------------------------------------------------------------------------------------------------------------------------------------------------------------------------------------------------------------------------------------------------------------------------------------------------------------------------------------------------------------------------------------------------------|
| <b>Cognitively Intact (CI) with risk factors</b>          | Absence of SCI and/or MCI based on below definitions, with two or more known risk factors for dementia.                                                                                  | Not having SCI or MCI, and having at least two (2) of the following risk factors: <ul style="list-style-type: none"> <li>• Obesity</li> <li>• Hypertension</li> <li>• Diabetes</li> <li>• Cardiovascular disease</li> <li>• Physical inactivity</li> <li>• First-degree family history of dementia</li> <li>• Dyslipidemia</li> <li>• Poor sleep</li> <li>• Poor diet</li> </ul>                                                |
| <b>Subjective Cognitive Impairment (SCI)<sup>59</sup></b> | Self-experienced persistent decline in cognitive capacity in comparison with a previously normal status and unrelated to an acute event.                                                 | Answer “yes” to both of the following questions: “Do you feel like your memory or thinking is becoming worse?” and “Does this concern you?”                                                                                                                                                                                                                                                                                     |
|                                                           | Normal age-, sex-, and education-adjusted performance on standardized cognitive tests, which are used to classify mild cognitive impairment (MCI) or prodromal Alzheimer’s Disease (AD). | Global Clinical Dementia Rating (CDR) scale = 0, Logical Memory II above Alzheimer’s Disease Neuroimaging Initiative (ADNI) education-adjusted cutoffs ( $\geq 9$ for 16+ years of education; $\geq 5$ for 8-15 years of education; $\geq 3$ for 0-7 years of education); Alzheimer’s Disease Assessment Scale-Cognitive (ADAS-Cog) word list recall score $> 5$ ; Montreal Cognitive Assessment (MoCA) total score $\geq 25$ . |
| <b>Mild Cognitive Impairment (MCI)<sup>5</sup></b>        | Concern regarding a change in cognition.                                                                                                                                                 | Report from patient and/or informant of such.                                                                                                                                                                                                                                                                                                                                                                                   |
|                                                           | Impairment in one or more cognitive domains.                                                                                                                                             | One or more of the following: <ul style="list-style-type: none"> <li>• Logical memory below ADNI cutoffs (<math>\geq 9</math> for 16+ years of education; <math>\geq 5</math> for 8-15 years of education; <math>\geq 3</math> for 0-7 years of education).</li> <li>• ADAS-Cog word list recall <math>&lt; 6</math>.</li> <li>• MoCA score 13-24 inclusive.</li> <li>• Global CDR <math>&gt; 0</math>.</li> </ul>              |
|                                                           | Preservation of independence in functional abilities.                                                                                                                                    | Score $> 14/23$ on the Lawton-Brody Instrumental Activities of Daily Living (IADL) scale.                                                                                                                                                                                                                                                                                                                                       |
| Not demented.                                             | Global CDR $\leq 0.5$ .                                                                                                                                                                  |                                                                                                                                                                                                                                                                                                                                                                                                                                 |

745  
746**Table 2.** General overview of active intervention exercise regimen structure.

| Section                       | Type of Exercise                                   | Duration (min)    |
|-------------------------------|----------------------------------------------------|-------------------|
| Warm Up                       | Marching in one place with arm swings for 1 minute | 1                 |
|                               | Dynamic Hamstring Stretching: 15 per side          | 1                 |
|                               | Shoulder Circles: 15 per direction                 | 1                 |
|                               | 15 Arm Reaches                                     | 0.5               |
|                               | Torso Twists: 15 per direction                     | 1                 |
|                               | Ankle Circles: 15 per direction per side           | 2                 |
|                               | Side Stepping for 1 minute                         | 1                 |
|                               | 15 Quarter Squats                                  | 1                 |
|                               | Total Warm Up Duration                             | 8                 |
| Break                         |                                                    | 1                 |
| 7 Strength Training Exercises | Chest                                              | 5                 |
|                               | Upper Back                                         | 5                 |
|                               | Bicep Curls                                        | 2.5               |
|                               | Abdominals                                         | 2.5               |
|                               | Mid/Lower Back                                     | 5                 |
|                               | Quadriceps                                         | 5                 |
|                               | Hamstrings                                         | 5                 |
|                               | Total Strength Training Duration                   | 30                |
| Break                         |                                                    | 3                 |
| Aerobic Exercise              | Alternating Video for Participants                 | 15                |
|                               | Total Aerobic Exercise Duration                    | 15                |
| Break                         |                                                    | 3                 |
| Cool Down                     | Quadriceps Stretch                                 | 0.5               |
|                               | Hamstring Stretch                                  | 0.5               |
|                               | Calf Stretch                                       | 0.5               |
|                               | 2 Hip Stretches                                    | 0.5               |
|                               | Static Torso Rotation                              | 0.5               |
|                               | Seated Side Bend                                   | 0.5               |
|                               | Back and Shoulder Stretch                          | 0.5               |
|                               | Chest Stretch                                      | 0.5               |
|                               | Triceps Stretch                                    | 0.5               |
|                               | Neck Stretch                                       | 0.5               |
| Total Cool Down Duration      | 5                                                  |                   |
| <b>Total Time</b>             |                                                    | <b>Approx. 65</b> |

747  
748

749 **Table 3.** General overview of control BAT regimen structure.

| Section                         | Type of Exercise                                        | Duration (min)    |
|---------------------------------|---------------------------------------------------------|-------------------|
| Warm Up                         | Marching in one place with arm swings for 1 minute      | 1                 |
|                                 | Dynamic Hamstring Stretching: 15 per side               | 1                 |
|                                 | Shoulder Circles: 15 per direction                      | 1                 |
|                                 | 15 Arm Reaches                                          | 0.5               |
|                                 | Torso Twists: 15 per direction                          | 1                 |
|                                 | Ankle Circles: 15 per direction per side                | 2                 |
|                                 | Side Stepping for 1 minute                              | 1                 |
|                                 | 15 Quarter Squats                                       | 1                 |
| Total Warm Up Duration          |                                                         | 8                 |
| Break                           |                                                         | 1                 |
| 7 Balance and Toning Activities | Standing with Feet Together + Tandem + Single Leg Stand | 10                |
|                                 | Core Contractions + Core & Arm Raises                   | 8                 |
|                                 | Shoulder Retractions                                    | 3                 |
|                                 | Isometric Quadriceps Strength                           | 3                 |
|                                 | Seated Hamstring Curls                                  | 3                 |
|                                 | Seated Arm Shake                                        | 3                 |
|                                 | Total Balance and Toning Duration                       |                   |
| Break                           |                                                         | 3                 |
| Stretching Exercise             | Alternating Video for Participants                      | 15                |
|                                 | Total Stretching Duration                               |                   |
| Break                           |                                                         | 3                 |
| Cool Down                       | Quadriceps Stretch                                      | 0.5               |
|                                 | Hamstring Stretch                                       | 0.5               |
|                                 | Calf Stretch                                            | 0.5               |
|                                 | 2 Hip Stretches                                         | 0.5               |
|                                 | Static Torso Rotation                                   | 0.5               |
|                                 | Seated Side Bend                                        | 0.5               |
|                                 | Back and Shoulder Stretch                               | 0.5               |
|                                 | Chest Stretch                                           | 0.5               |
|                                 | Triceps Stretch                                         | 0.5               |
|                                 | Neck Stretch                                            | 0.5               |
| Total Cool Down Duration        |                                                         | 5                 |
| <b>Total Time</b>               |                                                         | <b>Approx. 65</b> |

750

751

## Figure Captions

**Figure 1.** Design of the SYNERGIC@Home feasibility trial.

**Figure 2.** SPIRIT schedule of enrollment, interventions and assessments. Time points are:  $-t_2 = 4$  weeks prior to allocation;  $-t_1 = 2$  weeks prior to allocation;  $t_0 =$  Baseline testing and allocation (T0);  $t_1 =$  first week of interventions;  $t_2 =$  last week of interventions;  $t_3 = 4$ mo follow-up assessment (T4);  $t_4 = 2$  weeks prior to 10mo follow-up;  $t_5 = 10$ mo follow-up assessment (T10). Interventions are 3x per week for 16 weeks ( $t_1-t_2$ ). [a] Pre-screening at  $-t_2$  consists of exclusion screening and inclusion screening not requiring assessment, such as clinical dementia status and risk. [b] Final screening at  $-t_1$  consist cognitive battery #1, diet, sleep and functional risk factors used to designate participants as not demented but having mild cognitive impairment, subjective cognitive impairment, or cognitively intact with 2 or more risk factors. [c] Cognitive battery #1 ( $-t_1, t_3, t_5$ ) consists of: Telephone Cognitive Screen (TCogS); Full MoCA via Audio-Visual Conference; Lawton-Brody IADL; Cognitive Functional Composite (CFC-2) consisting of ADAS-Cog 3 Immediate Word Recall, Delayed Word Recall, and Orientation, Logical Memory I & II; Clinical Dementia Rating Scale (CDR), and Cognitive Functional Activities Questionnaire. [d] Cognitive battery #2 ( $t_0, t_3, t_5$ ) consists of: Oral Trail Making Test (Part A & B); Boston Naming Test; ADAS-Cog Word Recognition; DKEFS Phonemic Fluency Test and Semantic Fluency Test; WAIS III Digit Span Test; Digit Symbol Modalities Test-Oral Version. [e] Sleep and activity monitoring for 10 days prior to assessment time points ( $-t_1-t_0, t_2-t_3$  and  $t_4-t_5$ ) using wrist worn Actigraph (GT9X) monitor. [f] Dual task gait battery ( $-t_1, t_3, t_5$ ) consists of: Usual Gait; Seated Dual Task; Dual Task Gait counting backwards by ones, naming animals, and counting backwards by sevens. [g] Exit survey completed at end of study or upon early withdrawal when possible. [h] Polygenic Hazard Score biomarkers assessed via saliva sample at any time point during study.

Page 27 of 179

1  
2  
3 Enrollment  
4  
5  
6  
7  
8  
9

BMJ Open  
**Pre-screen → Consent → Final screening**

■ Active Intervention  
■ Control

**Baseline (T0)**  
Primary Analytic Assessment: Preference.  
Secondary Analytic Assessments: Cognition (CFC-2), Gait, Sleep, Diet, Blood Pressure, Salivary PHS, and Actigraphy\*

**Randomized into 4 Arms**

10  
11  
12  
13  
14  
15  
16  
17  
18  
19  
20  
21  
22  
23  
24  
25  
26  
27  
28  
29  
30  
31  
32  
33  
34  
35  
36  
37  
38  
39  
40

16-Weeks of Interventions

**Combined Exercise (AE + RT)**  
**Cognitive Training (NEUROPEAK™)**

**Combined Exercise (AE + RT)**  
**Control Cognitive Training (WS+V)**

**Control Exercise (BAT)**  
**Cognitive Training (NEUROPEAK™)**

**Control Exercise (BAT)**  
**Control Cognitive Training (WS+V)**

Follow Ups

**Immediate Post-Intervention Follow-Up at 4 Months (T4)**  
Primary Feasibility Outcome: Adherence. Primary Analytic Outcome: Preference.  
Secondary Feasibility Outcomes: Recruitment Rate, Retention Rate, Adverse Events, Trial Experience, Data Loss.  
Secondary Analytic Outcomes: Cognition (CFC-2), Gait, Sleep, Diet, Blood Pressure, Salivary PHS, and Actigraphy\*

**10-Month Follow-Up (T10) at 6 Months Post-Intervention**  
Secondary Feasibility Outcomes: Retention Rate.  
Secondary Analytic Outcomes: Cognition (CFC-2), Gait, Sleep, Diet, Blood Pressure, Salivary PHS, and Actigraphy\*

AE=Aerobic exercise, RT=Resistance training; BAT=Balance and toning; WS+V=Web search and video; PHS=Polygenic Hazard Score; \*Using ActiGraph GT9X.

| TIMEPOINT                                            | STUDY PERIOD    |                 |                |                 |                |                |                |                |                |
|------------------------------------------------------|-----------------|-----------------|----------------|-----------------|----------------|----------------|----------------|----------------|----------------|
|                                                      | Enrollment      |                 | Alloc.         | Post-Allocation |                |                |                |                | End            |
|                                                      | -t <sub>2</sub> | -t <sub>1</sub> | t <sub>0</sub> | t <sub>1</sub>  | t <sub>2</sub> | t <sub>3</sub> | t <sub>4</sub> | t <sub>5</sub> | t <sub>6</sub> |
| <b>ENROLLMENT:</b>                                   |                 |                 |                |                 |                |                |                |                |                |
| <sup>a</sup> Pre-screen                              | X               |                 |                |                 |                |                |                |                |                |
| Informed consent                                     | X               |                 |                |                 |                |                |                |                |                |
| <sup>b</sup> Final screening                         |                 | X               |                |                 |                |                |                |                |                |
| Allocation                                           |                 |                 | X              |                 |                |                |                |                |                |
| <b>INTERVENTIONS:</b>                                |                 |                 |                |                 |                |                |                |                |                |
| Arm 1: AE+RT + NEUROPEAK™                            |                 |                 |                | ←—→             |                |                |                |                |                |
| Arm 2: AE+RT + WS+V (control)                        |                 |                 |                | ←—→             |                |                |                |                |                |
| Arm 3: BAT (con.) + NEUROPEAK™                       |                 |                 |                | ←—→             |                |                |                |                |                |
| Arm 4: BAT (con.) + WS+V (con.)                      |                 |                 |                | ←—→             |                |                |                |                |                |
| <b>ASSESSMENTS:</b>                                  |                 |                 |                |                 |                |                |                |                |                |
| <b>Primary feasibility outcomes</b>                  |                 |                 |                |                 |                |                |                |                |                |
| Intervention adherence                               |                 |                 |                |                 |                | X              |                | X              |                |
| <b>Secondary feasibility outcomes</b>                |                 |                 |                |                 |                |                |                |                |                |
| Recruitment rate                                     |                 |                 |                |                 |                |                |                |                | X              |
| Retention rate                                       |                 |                 |                |                 |                |                |                |                | X              |
| Trial experience (1:1 interview)                     |                 |                 |                |                 |                |                |                | X              |                |
| Adverse events                                       |                 |                 |                | ←—→             |                |                |                |                |                |
| Data loss                                            |                 |                 |                |                 |                |                |                |                | X              |
| <b>Primary analytic outcomes</b>                     |                 |                 |                |                 |                |                |                |                |                |
| Preference Questionnaire                             |                 |                 | X              |                 |                | X              |                |                |                |
| <b>Secondary analytic outcomes</b>                   |                 |                 |                |                 |                |                |                |                |                |
| <sup>c</sup> Cognitive battery #1                    |                 | X               |                |                 |                | X              |                | X              |                |
| <sup>d</sup> Cognitive battery #2                    |                 |                 | X              |                 |                | X              |                | X              |                |
| Mediterranean Diet Assessment                        |                 | X               |                |                 |                | X              |                | X              |                |
| Eating Pattern Self-Assessment                       |                 |                 | X              |                 |                | X              |                | X              |                |
| Vitamin D Intake Questionnaire                       |                 |                 | X              |                 |                | X              |                | X              |                |
| <sup>e</sup> Sleep monitoring (Actigraphy)           |                 | ←—→             |                |                 | ←—→            |                | ←—→            |                |                |
| Pittsburgh Sleep Quality Index                       |                 | X               |                |                 |                | X              |                | X              |                |
| Work and Sleep Diary                                 |                 | ←—→             |                |                 |                |                |                |                |                |
| <sup>e</sup> Activity monitoring (Actigraphy)        |                 | ←—→             |                |                 | ←—→            |                | ←—→            |                |                |
| Clinical Frailty Scale                               |                 | X               |                |                 |                | X              |                | X              |                |
| Generalized Anxiety Disorder                         |                 | X               |                |                 |                | X              |                | X              |                |
| Geriatric Depression Scale                           |                 | X               |                |                 |                | X              |                | X              |                |
| Falls Calendar                                       |                 | ←—→             |                |                 |                |                |                |                |                |
| Physical Activity Scale for the Elderly              |                 |                 | X              |                 |                | X              |                | X              |                |
| Life Space Questionnaire                             |                 |                 | X              |                 |                | X              |                | X              |                |
| <sup>f</sup> Dual task gait battery                  |                 |                 | X              |                 |                | X              |                | X              |                |
| One Minute Sit to Stand Test                         |                 |                 | X              |                 |                | X              |                | X              |                |
| Short Form 36                                        |                 |                 | X              |                 |                | X              |                | X              |                |
| Get Active Questionnaire                             |                 | X               |                |                 |                |                |                |                |                |
| COVID-19 Questionnaire                               |                 |                 | X              |                 |                |                |                |                |                |
| Technology Ability and Use                           |                 |                 | X              |                 |                |                |                |                |                |
| STOFHLA Test                                         |                 | X               |                |                 |                |                |                |                |                |
| <sup>g</sup> Exit survey or early withdrawal debrief |                 |                 |                |                 |                |                |                | X              |                |
| <sup>h</sup> Polygenic Hazard Score                  |                 |                 |                |                 |                |                |                |                |                |

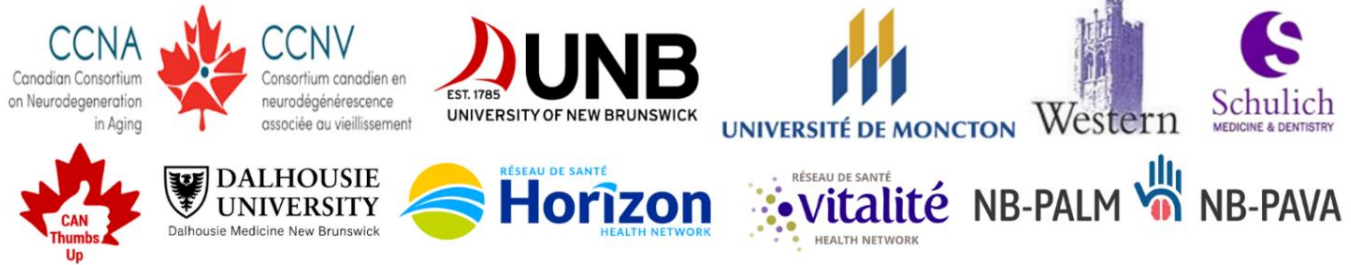

|                                                                                                                                                                                                |                                                                                                                                                                                                                                                                                                                                                                                                                                                                                                                                                                                                                                                                                                                                                                                                                                                                                                                                                                                                                                                                                                                                                                                                                                                                                                                                                                                                                                                             |
|------------------------------------------------------------------------------------------------------------------------------------------------------------------------------------------------|-------------------------------------------------------------------------------------------------------------------------------------------------------------------------------------------------------------------------------------------------------------------------------------------------------------------------------------------------------------------------------------------------------------------------------------------------------------------------------------------------------------------------------------------------------------------------------------------------------------------------------------------------------------------------------------------------------------------------------------------------------------------------------------------------------------------------------------------------------------------------------------------------------------------------------------------------------------------------------------------------------------------------------------------------------------------------------------------------------------------------------------------------------------------------------------------------------------------------------------------------------------------------------------------------------------------------------------------------------------------------------------------------------------------------------------------------------------|
| <p><b>Protocol Title</b></p> <p><b>Running Title</b></p> <p><b>Principal Investigators</b></p> <p><b>Protocol Number</b></p> <p><b>NCT Number</b></p> <p><b>Version</b></p> <p><b>Date</b></p> | <p><b>SYNchronizing Exercises, Remedies in Gait and Cognition at Home: Feasibility of a home-based double-blind randomized controlled trial to improve gait and cognition in individuals at risk for dementia/SYNchroniser l'ExeRcice et des solutions pour la démarche et la santé coGnitive Chez soi</b></p> <p><b>SYNERGIC@Home/SYNERGIE~Chez soi</b></p> <p>Chris A. McGibbon, PhD<br/>Faculty of Kinesiology and Institute of Biomedical Engineering,<br/>University of New Brunswick, New Brunswick, Canada.</p> <p>Pamela Jarrett, MD, FRCPC, FACP<br/>Department of Geriatric Medicine, Horizon Health Network, Saint John<br/>New Brunswick, Canada; Dalhousie Medicine New Brunswick,<br/>Dalhousie University, Halifax, Nova Scotia, Canada.</p> <p>Grant Handrigan, PhD<br/>School of Kinesiology and Recreation, Faculty of Health Sciences and<br/>Community Services, Université de Moncton, Moncton, New Brunswick,<br/>Canada</p> <p>Ludivine Witkowski, MD<br/>Department of Neuroscience, Dr. Georges-L.-Dumont University<br/>Hospital Centre, Moncton, New Brunswick, Canada</p> <p>Manuel Montero-Odasso, MD, PhD, FRCPC<br/>Schulich School of Medicine &amp; Dentistry, London, Ontario, Canada;<br/>Departments of Medicine (Geriatrics) and of Epidemiology and<br/>Biostatistics, University of Western Ontario, London, Ontario, Canada</p> <p><b>SYNH001</b><br/><b>NCT04997681</b><br/><b>8.0</b><br/><b>Feb 20, 2022</b></p> |
|------------------------------------------------------------------------------------------------------------------------------------------------------------------------------------------------|-------------------------------------------------------------------------------------------------------------------------------------------------------------------------------------------------------------------------------------------------------------------------------------------------------------------------------------------------------------------------------------------------------------------------------------------------------------------------------------------------------------------------------------------------------------------------------------------------------------------------------------------------------------------------------------------------------------------------------------------------------------------------------------------------------------------------------------------------------------------------------------------------------------------------------------------------------------------------------------------------------------------------------------------------------------------------------------------------------------------------------------------------------------------------------------------------------------------------------------------------------------------------------------------------------------------------------------------------------------------------------------------------------------------------------------------------------------|



1  
2 **Protocol Changes Table**

| <b>Affected Sections</b> | <b>Change(s)</b> | <b>Rationale</b> |
|--------------------------|------------------|------------------|
|                          |                  |                  |
|                          |                  |                  |
|                          |                  |                  |

3  
4  
5  
6  
7  
8  
9  
10  
11  
12  
13  
14  
15  
16  
17  
18  
19  
20  
21  
22  
23  
24  
25  
26  
27  
28  
29  
30  
31  
32  
33  
34  
35  
36  
37  
38  
39  
40  
41  
42  
43  
44  
45  
46  
47  
48  
49  
50  
51  
52  
53  
54  
55  
56  
57  
58  
59  
60

For peer review only

# SYNERGIC@Home TRIAL

## SYNchronizing Exercises, Remedies in Gait and Cognition @Home

### Feasibility of a Home-Based Double-Blind Randomized Controlled Trial to Improve Gait and Cognition in Individuals at Risk for Dementia

#### Principal Investigators

Chris McGibbon PhD<sup>1,2</sup>, Pamela Jarrett MD FRCPC FACP<sup>3</sup>, Grant Handrigan PhD<sup>4</sup>,

Ludivine Witkowski MD FRCPC<sup>5</sup> and Manuel Montero-Odasso MD PhD FRCPC<sup>6,7</sup>.

#### Co-Principle Investigators

Carole C. Tranchant PhD<sup>8</sup>, Danielle Bouchard PhD CEP<sup>1</sup>, Linda Yetman RN PhD<sup>9</sup>, Bryn  
Robinson PhD<sup>9</sup>

Alison Rodger MD FRCPC<sup>3</sup>, Patrick Feltmate MD FRCPC<sup>17</sup>, Wayne Sheehan MD CCFP(COE)  
FCFP<sup>9</sup>, Lise Babin MD FRCPC<sup>16</sup>

#### Collaborators

Teresa Liu-Ambrose PT PhD<sup>10</sup>, Laura Middleton PhD<sup>11</sup>, Quincy J Almeida PhD<sup>12</sup>, Louis Bherer  
PhD<sup>13</sup>, Andrew Lim MD FRCPC<sup>14</sup>, and Mark Speechley PhD<sup>6</sup>.

#### Project Research Study Staff

NB-PALM Project Manager: Andrew Sexton PEng<sup>2</sup>

SYNERGIC Project Research Manager and Coordinator: Nellie Kamkar MSc<sup>18</sup>

1 Synergic@Home Research Coordinators: Alana Gullison MSc<sup>2</sup>, Kelly McMillan<sup>15</sup>, Chris  
2 Pauley<sup>9</sup>, Jacques Frigault<sup>16</sup>  
3  
4  
5  
6  
7  
8

9 **Affiliations:** <sup>1</sup>Faculty of Kinesiology, University of New Brunswick, Fredericton, New  
10 Brunswick, Canada; <sup>2</sup>Institute of Biomedical Engineering, University of New Brunswick,  
11 Fredericton, New Brunswick, Canada; <sup>3</sup>Department of Geriatric Medicine, Horizon Health  
12 Network, Saint John New Brunswick; Dalhousie Medicine New Brunswick, Dalhousie  
13 University, Halifax, Nova Scotia, Canada; <sup>4</sup>School of Kinesiology and Recreation, Faculty of  
14 Health Sciences and Community Services, Université de Moncton, Moncton, New Brunswick,  
15 Canada; <sup>5</sup>Department of Neuroscience, Dr. Georges-L-Dumont University Hospital Centre,  
16 Vitalité Health Network, Moncton, New Brunswick, Canada; <sup>6</sup>Schulich School of Medicine and  
17 Dentistry, London Ontario, Canada; <sup>7</sup>Departments of Medicine (Geriatrics) and of  
18 Epidemiology and Biostatistics, University of Western Ontario, London, Ontario, Canada;  
19 <sup>8</sup>School of Food Science, Nutrition and Family Studies, Faculty of Health Sciences and  
20 Community Services, Université de Moncton, Moncton, New Brunswick, Canada; <sup>9</sup>Horizon  
21 Health Network, Saint John, New Brunswick, Canada; <sup>10</sup>Department of Physical Therapy,  
22 University of British Columbia, Vancouver, British Columbia, Canada; <sup>11</sup>Department of  
23 Kinesiology, School of Public Health and Health Systems, Faculty of Applied Sciences,  
24 University of Waterloo, Waterloo, Ontario, Canada; <sup>12</sup>Department of Kinesiology and Physical  
25 Education, Faculty of Science, Wilfred Laurier University, Waterloo, Ontario, Canada;  
26 <sup>13</sup>Department of Psychology, Faculty of Arts and Science, Concordia University, Montréal,  
27 Québec, Canada; <sup>14</sup>Division of Neurology, Department of Medicine, Sunnybrook Health  
28 Sciences Centre, Toronto, Ontario, Canada; <sup>15</sup>Horizon Health Network, Fredericton, New  
29 Brunswick, Canada. <sup>16</sup>Vitalité Health Network, Moncton, New Brunswick, Canada;  
30 <sup>17</sup>Department of Geriatric Medicine, Horizon Health Network, Fredericton New Brunswick;  
31 Dalhousie Medicine New Brunswick, Dalhousie University, Halifax, Nova Scotia, Canada;  
32 <sup>18</sup>Gait and Brain Laboratory, Lawson Health Research Institute, Parkwood Hospital, London  
33 Ontario, Canada  
34  
35  
36  
37  
38  
39  
40  
41  
42  
43  
44  
45  
46  
47  
48  
49  
50  
51  
52  
53  
54  
55  
56  
57  
58  
59  
60

1 **Confidentiality Statement.** This document contains information that is privileged or  
2 confidential and may not be disclosed unless such disclosure is required by applicable laws  
3 and regulations. In any event, persons to whom the information is disclosed must be informed  
4 that the information is privileged or confidential and may not be further disclosed by them.  
5 These restrictions on disclosure will apply equally to all future information supplied to you,  
6 which is indicated as privileged or confidential.  
7  
8  
9  
10  
11  
12  
13  
14  
15  
16  
17  
18  
19  
20  
21  
22  
23  
24  
25  
26  
27  
28  
29  
30  
31  
32  
33  
34  
35  
36  
37  
38  
39  
40  
41  
42  
43  
44  
45  
46  
47  
48  
49  
50  
51  
52  
53  
54  
55  
56  
57  
58  
59  
60

For peer review only

## TABLE OF CONTENTS

|                                                              |           |
|--------------------------------------------------------------|-----------|
| <b>LIST OF FIGURES .....</b>                                 | <b>11</b> |
| <b>LIST OF TABLES.....</b>                                   | <b>11</b> |
| <b>SIGNATURE PAGE .....</b>                                  | <b>12</b> |
| <b>1. EXECUTIVE SUMMARY      13</b>                          |           |
| <b>2. ABSTRACT      22</b>                                   |           |
| <b>3. BACKGROUND 24</b>                                      |           |
| <b>3.1 RATIONALE OF THE INTERVENTIONS .....</b>              | <b>24</b> |
| 3.1.1 Physical Exercise .....                                | 24        |
| 3.1.2 Cognitive Training.....                                | 25        |
| 3.1.3 Combined Physical Exercise and Cognitive Training..... | 25        |
| 3.1.4 Rationale for Polygenic Hazard Score Testing.....      | 26        |
| <b>3.2 SIGNIFICANCE OF THE SYNERGIC@HOME TRIAL.....</b>      | <b>27</b> |
| <b>4. RESEARCH QUESTIONS AND OBJECTIVES 28</b>               |           |
| <b>4.1 PRIMARY FEASIBILITY OBJECTIVES .....</b>              | <b>28</b> |
| 4.1.1 Intervention Adherence .....                           | 28        |
| <b>4.2 SECONDARY FEASIBILITY OBJECTIVES.....</b>             | <b>28</b> |
| 4.2.1 Recruitment Rate.....                                  | 28        |
| 4.2.2 Retention Rate.....                                    | 29        |
| 4.2.3 Assessment Tolerability.....                           | 29        |
| 4.2.4 Trial Experience.....                                  | 29        |
| 4.2.5 Adverse Events.....                                    | 29        |
| 4.2.6 Data Loss.....                                         | 29        |
| <b>4.3. PRIMARY ANALYTIC OBJECTIVES .....</b>                | <b>29</b> |
| <b>4.4. SECONDARY ANALYTIC OBJECTIVES .....</b>              | <b>30</b> |
| 4.4.1. Cognitive Improvement.....                            | 30        |
| 4.4.2. Mobility Improvement. ....                            | 30        |
| <b>5. METHODS/DESIGN      30</b>                             |           |

|    |                                                         |           |
|----|---------------------------------------------------------|-----------|
| 1  | <b>5.1 STUDY DESIGN</b> .....                           | <b>30</b> |
| 2  |                                                         |           |
| 3  |                                                         |           |
| 4  | 5.1.1 Treatment Arms .....                              | 30        |
| 5  | 5.1.2 Study Sequence and Duration .....                 | 31        |
| 6  | 5.1.3 Setting .....                                     | 34        |
| 7  |                                                         |           |
| 8  | <b>5.2 STUDY POPULATION</b> .....                       | <b>35</b> |
| 9  |                                                         |           |
| 10 |                                                         |           |
| 11 | 5.2.1 Inclusion Criteria .....                          | 35        |
| 12 | 5.2.2 Exclusion Criteria .....                          | 38        |
| 13 | 5.2.3 Screen Failures .....                             | 39        |
| 14 | 5.2.4 Study Care Partner .....                          | 39        |
| 15 | 5.2.5 Strategies for Recruitment .....                  | 40        |
| 16 | 5.2.6 Strategies for Retention .....                    | 41        |
| 17 |                                                         |           |
| 18 | <b>5.3 ASSESSMENTS TOOLS</b> .....                      | <b>42</b> |
| 19 |                                                         |           |
| 20 |                                                         |           |
| 21 | <b>6. OUTCOMES</b> <b>46</b>                            |           |
| 22 |                                                         |           |
| 23 |                                                         |           |
| 24 | <b>6.1 PRIMARY FEASIBILITY OUTCOMES</b> .....           | <b>46</b> |
| 25 |                                                         |           |
| 26 | 6.1.1 Intervention Adherence .....                      | 46        |
| 27 |                                                         |           |
| 28 | <b>6.2 SECONDARY FEASIBILITY OUTCOMES</b> .....         | <b>46</b> |
| 29 |                                                         |           |
| 30 |                                                         |           |
| 31 | 6.2.1 Recruitment Enrollment Rate .....                 | 46        |
| 32 | 6.2.2 Enrollment Retention Rate .....                   | 46        |
| 33 | 6.2.3 Assessment Tolerability .....                     | 46        |
| 34 | 6.2.4 Trial Experience .....                            | 47        |
| 35 | 6.2.5 Adverse Events .....                              | 47        |
| 36 | 6.2.6 Data Loss .....                                   | 47        |
| 37 |                                                         |           |
| 38 | <b>6.3 PRIMARY ANALYTIC OUTCOMES</b> .....              | <b>48</b> |
| 39 |                                                         |           |
| 40 |                                                         |           |
| 41 | 6.3.1 Intervention Preference .....                     | 48        |
| 42 |                                                         |           |
| 43 | <b>6.4 SECONDARY ANALYTIC OUTCOMES</b> .....            | <b>49</b> |
| 44 |                                                         |           |
| 45 | 6.4.1 Demographic Information and Medical History ..... | 49        |
| 46 | 6.4.2 Cognitive Testing .....                           | 49        |
| 47 | 6.4.3 Sleep Patterns .....                              | 53        |
| 48 | 6.4.4 Diet Patterns .....                               | 53        |
| 49 | 6.4.5 Functional Independence and Activity Level .....  | 54        |
| 50 | 6.4.6 Psychiatric Health and Well-Being .....           | 55        |
| 51 | 6.4.7 Health Literacy .....                             | 55        |
| 52 | 6.4.8 Technology Ability and Use .....                  | 55        |
| 53 | 6.4.9 Gait and Mobility Assessments .....               | 56        |
| 54 | 6.4.10 Biological Marke .....                           | 59        |
| 55 |                                                         |           |
| 56 |                                                         |           |
| 57 |                                                         |           |
| 58 |                                                         |           |
| 59 |                                                         |           |
| 60 |                                                         |           |

|    |                                                                                    |           |
|----|------------------------------------------------------------------------------------|-----------|
| 1  | <b>7. STUDY INTERVENTIONS</b>                                                      | <b>60</b> |
| 2  |                                                                                    |           |
| 3  |                                                                                    |           |
| 4  | <b>7.1 INTERVENTION DESCRIPTION</b>                                                | <b>60</b> |
| 5  |                                                                                    |           |
| 6  |                                                                                    |           |
| 7  | <b>7.2 INTERVENTIONS</b>                                                           | <b>61</b> |
| 8  |                                                                                    |           |
| 9  |                                                                                    |           |
| 10 | 7.2.1 Active Exercise Intervention: Aerobic Exercise + Resistance Training (AE+RT) | 61        |
| 11 | 7.2.2 Control Exercise Intervention: Balance and Toning (BAT)                      | 66        |
| 12 | 7.2.3 Cognitive Training: NEUROPEAK™                                               | 68        |
| 13 | 7.2.4 Control Cognitive Training: Web Search and Video (WS+V)                      | 69        |
| 14 |                                                                                    |           |
| 15 | <b>7.3 RANDOMIZATION</b>                                                           | <b>70</b> |
| 16 |                                                                                    |           |
| 17 | 7.3.1 Method                                                                       | 70        |
| 18 | 7.3.2 Procedure                                                                    | 71        |
| 19 |                                                                                    |           |
| 20 | <b>7.4 BLINDING</b>                                                                | <b>71</b> |
| 21 |                                                                                    |           |
| 22 |                                                                                    |           |
| 23 | 7.4.1 Maintaining Blinding                                                         | 71        |
| 24 | 7.4.2 Unblinding                                                                   | 71        |
| 25 | 7.4.3 Debriefing                                                                   | 72        |
| 26 |                                                                                    |           |
| 27 | <b>7.5 EARLY WITHDRAWAL</b>                                                        | <b>72</b> |
| 28 |                                                                                    |           |
| 29 |                                                                                    |           |
| 30 | <b>7.6 MIXED METHODS DESIGN: EXPERIENCE OF STUDY PARTICIPANTS</b>                  | <b>73</b> |
| 31 |                                                                                    |           |
| 32 | 7.6.1 Mixed Methods Design                                                         | 74        |
| 33 | 7.6.2 Data Collection Instruments                                                  | 74        |
| 34 | 7.6.3 Participant Exit Questionnaire                                               | 75        |
| 35 | 7.6.4 Participant Semi-Structured Interview                                        | 76        |
| 36 | 7.6.5 Triangulation                                                                | 76        |
| 37 |                                                                                    |           |
| 38 | <b>7.7 COMPENSATION</b>                                                            | <b>76</b> |
| 39 |                                                                                    |           |
| 40 |                                                                                    |           |
| 41 | <b>8. STATISTICAL CONSIDERATIONS</b>                                               | <b>77</b> |
| 42 |                                                                                    |           |
| 43 |                                                                                    |           |
| 44 | <b>8.1 SAMPLE SIZE AND POWER ANALYSIS</b>                                          | <b>77</b> |
| 45 |                                                                                    |           |
| 46 |                                                                                    |           |
| 47 | <b>8.2 PLANNED DATA ANALYSIS</b>                                                   | <b>77</b> |
| 48 |                                                                                    |           |
| 49 | 8.2.1 Primary Feasibility Outcomes                                                 | 77        |
| 50 | 8.2.2 Secondary Feasibility Outcomes                                               | 78        |
| 51 | 8.2.3 Primary Analytic Outcomes                                                    | 79        |
| 52 | 8.2.4 Secondary Analytic Outcomes                                                  | 81        |
| 53 |                                                                                    |           |
| 54 | <b>8.3 FREQUENCY OF THE DATA ANALYSES</b>                                          | <b>81</b> |
| 55 |                                                                                    |           |
| 56 |                                                                                    |           |

|    |                                                              |           |
|----|--------------------------------------------------------------|-----------|
| 1  |                                                              |           |
| 2  | <b>9. ADVERSE EVENTS</b>                                     | <b>81</b> |
| 3  |                                                              |           |
| 4  | <b>9.1 DEFINITIONS</b> .....                                 | <b>81</b> |
| 5  |                                                              |           |
| 6  |                                                              |           |
| 7  | 9.1.1 Adverse Event (AE) .....                               | 81        |
| 8  | 9.1.2 Serious Adverse Event (SAE) .....                      | 82        |
| 9  |                                                              |           |
| 10 | <b>9.2 CLASSIFICATION</b> .....                              | <b>82</b> |
| 11 |                                                              |           |
| 12 |                                                              |           |
| 13 | 9.2.1 Severity.....                                          | 82        |
| 14 | 9.2.2 Attribution.....                                       | 83        |
| 15 |                                                              |           |
| 16 | <b>9.3 PROCEDURES FOR AE AND SAE REPORTING</b> .....         | <b>83</b> |
| 17 |                                                              |           |
| 18 |                                                              |           |
| 19 | 9.3.1 Adverse Event (AE) Reporting .....                     | 83        |
| 20 | 9.3.2 Serious Adverse Event (SAE) Reporting.....             | 84        |
| 21 | 9.3.3 Period of Observation.....                             | 84        |
| 22 |                                                              |           |
| 23 | <b>10. ETHICAL AND OPERATIONAL CONSIDERATIONS</b>            | <b>84</b> |
| 24 |                                                              |           |
| 25 |                                                              |           |
| 26 | <b>10.1 ETHICAL CONSIDERATIONS</b> .....                     | <b>85</b> |
| 27 |                                                              |           |
| 28 | 10.1.1 Informed Consent .....                                | 85        |
| 29 | 10.1.2 Confidentiality and Privacy .....                     | 86        |
| 30 | 10.1.3 Biospecimen Collection Privacy .....                  | 86        |
| 31 |                                                              |           |
| 32 | <b>10.2 STUDY SAFETY AND MONITORING COMMITTEE</b> .....      | <b>86</b> |
| 33 |                                                              |           |
| 34 |                                                              |           |
| 35 | <b>10.3 RISK MANAGEMENT AND SAFETY MONITORING PLAN</b> ..... | <b>87</b> |
| 36 |                                                              |           |
| 37 |                                                              |           |
| 38 | 10.3.1 Safety Monitoring.....                                | 87        |
| 39 | 10.3.2 Withdrawal for Safety Reasons .....                   | 88        |
| 40 | 10.3.3 Study-wide Stopping Rules .....                       | 88        |
| 41 |                                                              |           |
| 42 | <b>10.4 INCIDENTAL FINDINGS</b> .....                        | <b>88</b> |
| 43 |                                                              |           |
| 44 |                                                              |           |
| 45 | <b>10.5 PROTOCOL DEVIATIONS</b> .....                        | <b>88</b> |
| 46 |                                                              |           |
| 47 | <b>10.6 DATA MANAGEMENT AND STORAGE</b> .....                | <b>89</b> |
| 48 |                                                              |           |
| 49 |                                                              |           |
| 50 | 10.6.1 Primary Source Data .....                             | 89        |
| 51 | 10.6.2 Secondary Source Data .....                           | 89        |
| 52 | 10.6.3 Video and Audio Recording.....                        | 89        |
| 53 |                                                              |           |
| 54 | <b>10.7 FUTURE USE OF STORED SPECIMENS AND DATA</b> .....    | <b>90</b> |
| 55 |                                                              |           |
| 56 | <b>10.8 PUBLICATION AND DATA SHARING POLICY</b> .....        | <b>91</b> |
| 57 |                                                              |           |
| 58 |                                                              |           |
| 59 |                                                              |           |
| 60 |                                                              |           |



|                                                              |           |
|--------------------------------------------------------------|-----------|
| 10.8.1 Dissemination of Study Findings .....                 | 91        |
| 10.8.2 Authorship .....                                      | 91        |
| 10.8.3 Data Ownership .....                                  | 92        |
| <b>11. DISCUSSION</b>                                        | <b>92</b> |
| 11.1 SIGNIFICANCE OF ESTABLISHING FEASIBILITY .....          | 92        |
| 11.2 SIGNIFICANCE OF EXAMINING INTERVENTION PREFERENCE ..... | 93        |
| 11.3 SIGNIFICANCE OF SECONDARY OUTCOMES .....                | 93        |
| 11.4 BENEFITS OF INTERVENTIONS .....                         | 93        |
| 11.4.1 Benefits of Exercise .....                            | 93        |
| 11.4.2 Benefits of Cognitive Training .....                  | 94        |
| 11.5 STRENGTHS AND CONCLUDING REMARKS .....                  | 94        |
| <b>12. RESEARCH TIMELINE</b>                                 | <b>95</b> |
| <b>13. LIST OF ABBREVIATIONS</b>                             | <b>96</b> |
| <b>14. DECLARATIONS</b>                                      | <b>98</b> |
| <b>15. APPENDICES</b>                                        | <b>98</b> |
| APPENDIX A: INTERVENTION PREFERENCE QUESTIONNAIRE .....      | 98        |
| APPENDIX B: MATERIALS GIVEN TO PARTICIPANTS .....            | 101       |
| APPENDIX C: RECRUITMENT PLAN AND MATERIALS .....             | 102       |
| APPENDIX D: EXIT QUESTIONNAIRE .....                         | 125       |
| APPENDIX E: SEMI-STRUCTURED INTERVIEW GUIDE .....            | 127       |
| APPENDIX F: CASE REPORT FORMS .....                          | 129       |
| APPENDIX G BUDGET SUMMARY .....                              | 130       |
| APPENDIX H: NEUROPEAK DUAL TASK SOFTWARE - SAMPLES .....     | 132       |
| APPENDIX I: PROTOCOL DEVIATION FORMS .....                   | 135       |

**16. REFERENCES 139****LIST OF FIGURES**

|                                                             |    |
|-------------------------------------------------------------|----|
| Figure 1. Design of the SYNERGIC@Home trial.....            | 31 |
| Figure 2. Participant timeline through the trial. ....      | 34 |
| Figure 3. Attrition flowchart for SYNERGIC@Home trial. .... | 47 |

**LIST OF TABLES**

|                                                                                                                                                                                                     |    |
|-----------------------------------------------------------------------------------------------------------------------------------------------------------------------------------------------------|----|
| Table 1. Canadian Consortium on Neurodegeneration in Aging (CCNA) Criteria for Cognitively Intact with risk factors, and Subjective and Mild Cognitive Impairment from COMPASS-ND <sup>2</sup> . 37 |    |
| Table 2. Assessments across Study Visits for SYNERGIC@Home Trial .....                                                                                                                              | 42 |
| Table 3. General overview of active intervention exercise regimen structure.....                                                                                                                    | 61 |
| Table 4. Example progression of strength training guideline across intervention. ....                                                                                                               | 63 |
| Table 5. Tailored resistance training prescription by mobility and exercise ability.....                                                                                                            | 63 |
| Table 6. General overview of control BAT regimen structure. ....                                                                                                                                    | 66 |
| Table 7. Kirkpatrick's Framework for Evaluation of Participant Experience .....                                                                                                                     | 74 |

**SIGNATURE PAGE**

\_\_\_\_\_  
SIGNATURE

\_\_\_\_\_  
DATE (DD/MM/YYYY)

**Dr. Chris A. McGibbon, PhD**

Faculty of Kinesiology and Institute of Biomedical Engineering, University of New Brunswick, Fredericton, New Brunswick, Canada.

\_\_\_\_\_  
SIGNATURE

\_\_\_\_\_  
DATE (DD/MM/YYYY)

**Dr. Pamela Jarrett, MD FRCPC FACP**

Department of Geriatric Medicine, Horizon Health Network, Saint John, New Brunswick, Canada. Dalhousie University, Halifax, Nova Scotia, Canada

\_\_\_\_\_  
SIGNATURE

\_\_\_\_\_  
DATE (DD/MM/YYYY)

**Dr. Grant Handrigan, PhD**

School of Kinesiology and Recreation, Faculty of Health Sciences and Community Services, Université de Moncton, Moncton, New Brunswick, Canada

\_\_\_\_\_  
SIGNATURE

\_\_\_\_\_  
DATE (DD/MM/YYYY)

**Dr. Ludivine Chamard-Witkowski, MD**

Department of Neuroscience, Dr. Georges-L.-Dumont University Hospital Centre, Moncton, New Brunswick, Canada

\_\_\_\_\_  
SIGNATURE

\_\_\_\_\_  
DATE (DD/MM/YYYY)

**Dr. Manuel Montero-Odasso, MD, PhD, FRCPC**

Gait and Brain Laboratory, Parkwood Institute, Lawson Health Research Institute, London, ON, Canada; Division of Geriatric Medicine, Department of Medicine, Schulich School of Medicine & Dentistry, London, ON, Canada; Department of Epidemiology and Biostatistics, University of Western Ontario, London, ON, Canada.

## 1. EXECUTIVE SUMMARY

|                        |                                                                                                                                                                                                                                                                                                                                                                                                                                                                                                                                                                                                                                                                                                                                                                                                                                                                                                                                                                                                                                                                                                               |
|------------------------|---------------------------------------------------------------------------------------------------------------------------------------------------------------------------------------------------------------------------------------------------------------------------------------------------------------------------------------------------------------------------------------------------------------------------------------------------------------------------------------------------------------------------------------------------------------------------------------------------------------------------------------------------------------------------------------------------------------------------------------------------------------------------------------------------------------------------------------------------------------------------------------------------------------------------------------------------------------------------------------------------------------------------------------------------------------------------------------------------------------|
| Title                  | <p>SYNchronizing Exercises, Remedies in Gait and Cognition @Home (SYNERGIC@Home/SYNERGIE~Chez soi): Feasibility of a Home-Based Double-Blind Randomized Controlled Trial to Improve Gait and Cognition in Individuals at Risk for Dementia</p>                                                                                                                                                                                                                                                                                                                                                                                                                                                                                                                                                                                                                                                                                                                                                                                                                                                                |
| Background & Rationale | <p>In Canada, it is estimated that there are currently over 500,000 older adults living with Alzheimer's Disease and Related Dementias (ADRDs). Encouragingly, close to a third of ADRD cases could be prevented by addressing modifiable risk factors<sup>1</sup>. Physical exercise and cognitive training are emerging interventions that have the potential to enhance cognitive function and mobility in older adults with Mild Cognitive Impairment (MCI). The SYNERGIC trial (SYNchronizing Exercises, Remedies in Gait and Cognition), a large multi-site randomized control trial, showed promising preliminary data that combined aerobic exercise and progressive resistance training (AE+RT) with cognitive training (NEUROPEAK™) had a better effect on cognition than a balance and toning control (BAT) intervention and control cognitive training with web search and video (WS+V) activities. While these interventions were provided face to face in a research facility, little is known about the feasibility of providing these multi-domain interventions in older adults at home.</p> |
| Study Design           | <p>This feasibility study is a factorial design Randomized Control Trial (RCT) in which participants will be randomized (in blocks of 4) into one of four arms:</p> <p>Arm 1: <b>Combined exercise (AE+RT) + Cognitive training (Neuropeak)</b><br/>         Arm 2: <b>Combined exercise (AE+RT)</b> + Control cognitive training (WS+V)<br/>         Arm 3: Control exercise (BAT) + <b>Cognitive training (Neuropeak)</b><br/>         Arm 4: Control exercise (BAT) + Control cognitive training (WS+V)</p> <p>Note: The active interventions are in bold. Arm 4 has the active control interventions.</p>                                                                                                                                                                                                                                                                                                                                                                                                                                                                                                 |

|                                                                                                                                                                                                                                                                                                                                                                                                                             |                                                                                                                                                                                                                                                                                                                                                                                                                                                                                                                                                                                                                                                                                                                                                                                                                                                                                                                                                                                                                                                                                                                                                                                                                                                                                                                                                                                                                                                                                                                                                                            |
|-----------------------------------------------------------------------------------------------------------------------------------------------------------------------------------------------------------------------------------------------------------------------------------------------------------------------------------------------------------------------------------------------------------------------------|----------------------------------------------------------------------------------------------------------------------------------------------------------------------------------------------------------------------------------------------------------------------------------------------------------------------------------------------------------------------------------------------------------------------------------------------------------------------------------------------------------------------------------------------------------------------------------------------------------------------------------------------------------------------------------------------------------------------------------------------------------------------------------------------------------------------------------------------------------------------------------------------------------------------------------------------------------------------------------------------------------------------------------------------------------------------------------------------------------------------------------------------------------------------------------------------------------------------------------------------------------------------------------------------------------------------------------------------------------------------------------------------------------------------------------------------------------------------------------------------------------------------------------------------------------------------------|
| <p>1<br/>2<br/>3<br/>4<br/>5<br/>6<br/>7<br/>8<br/>9<br/>10<br/>11<br/>12<br/>13<br/>14<br/>15<br/>16<br/>17<br/>18<br/>19<br/>20<br/>21<br/>22<br/>23<br/>24<br/>25<br/>26<br/>27<br/>28<br/>29<br/>30<br/>31<br/>32<br/>33<br/>34<br/>35<br/>36<br/>37<br/>38<br/>39<br/>40<br/>41<br/>42<br/>43<br/>44<br/>45<br/>46<br/>47<br/>48<br/>49<br/>50<br/>51<br/>52<br/>53<br/>54<br/>55<br/>56</p> <p>Study<br/>Duration</p> | <p>Estimated duration of entire trial period is approximately 24 months.</p>                                                                                                                                                                                                                                                                                                                                                                                                                                                                                                                                                                                                                                                                                                                                                                                                                                                                                                                                                                                                                                                                                                                                                                                                                                                                                                                                                                                                                                                                                               |
| <p>5<br/>6<br/>7<br/>8</p> <p>Number of<br/>Participants</p>                                                                                                                                                                                                                                                                                                                                                                | <p>N = 64 community-dwelling older adult participants.</p>                                                                                                                                                                                                                                                                                                                                                                                                                                                                                                                                                                                                                                                                                                                                                                                                                                                                                                                                                                                                                                                                                                                                                                                                                                                                                                                                                                                                                                                                                                                 |
| <p>9<br/>10<br/>11<br/>12<br/>13<br/>14<br/>15<br/>16<br/>17<br/>18<br/>19<br/>20<br/>21<br/>22<br/>23<br/>24<br/>25<br/>26<br/>27<br/>28<br/>29<br/>30<br/>31<br/>32<br/>33<br/>34<br/>35<br/>36<br/>37<br/>38<br/>39<br/>40<br/>41<br/>42<br/>43<br/>44<br/>45<br/>46<br/>47<br/>48<br/>49<br/>50<br/>51<br/>52<br/>53<br/>54<br/>55<br/>56</p> <p>Target<br/>Population</p>                                              | <p>All Participants:</p> <ul style="list-style-type: none"> <li>• Ages 60-90.</li> <li>• Has a Family Physician or a Nurse Practitioner.</li> <li>• Internet access (have regular access to email), technology ability (able to send and receive emails), and access to a home computer and/or laptop computer device.</li> <li>• Self-reported levels of proficiency in English and/or French for speaking and understanding spoken and written language.</li> <li>• Able to comply with scheduled home-based assessments, interventions, treatment plan, and other trial procedures.</li> <li>• Able to ambulate at least 10 meters independently with or without a walking aid.</li> <li>• Being at risk of developing dementia:             <ol style="list-style-type: none"> <li>a) <b>Mild Cognitive Impairment (MCI).</b> Diagnosis of Mild Cognitive Impairment, in accordance with the Comprehensive Assessment of Neurodegeneration and Dementia COMPASS-ND study<sup>2</sup> definition (see Table 1).</li> <li>b) <b>Subjective Cognitive Impairment (SCI).</b> Diagnosis of Subjective Cognitive Impairment, in accordance with COMPASS-ND study<sup>2</sup> definition (see Table 1).</li> <li>c) <b>Cognitively Intact with Risk Factors.</b> Cognitively intact based on COMPASS-ND definition (in Table 1) AND have a history of <i>two or more risk factors</i> for dementia, defined as the following:                 <ul style="list-style-type: none"> <li>▪ Obesity</li> <li>▪ Hypertension</li> <li>▪ Diabetes</li> </ul> </li> </ol> </li> </ul> |

|                               |                                                                                                                                                                                                                                                                                                                                                                                                                                                                                                                                                                                                                                                                                                                                                                                                                                                                                                                                                                                                                                                                                                                                                                                                              |
|-------------------------------|--------------------------------------------------------------------------------------------------------------------------------------------------------------------------------------------------------------------------------------------------------------------------------------------------------------------------------------------------------------------------------------------------------------------------------------------------------------------------------------------------------------------------------------------------------------------------------------------------------------------------------------------------------------------------------------------------------------------------------------------------------------------------------------------------------------------------------------------------------------------------------------------------------------------------------------------------------------------------------------------------------------------------------------------------------------------------------------------------------------------------------------------------------------------------------------------------------------|
|                               | <ul style="list-style-type: none"> <li>▪ Physical Inactivity</li> <li>▪ Cardiovascular disease</li> <li>▪ First-Degree Family History of Dementia</li> <li>▪ Dyslipidemia</li> <li>▪ Poor sleep</li> <li>▪ Poor diet</li> </ul> <ul style="list-style-type: none"> <li>• Preserved activities of daily living, operationalized as a score &gt;14/23 on the Lawton-Brody Instrumental Activities of Daily Living (IADL)<sup>3</sup> scale and confirmed by clinician's interviews.</li> <li>• Must be medically able to participate in the study's exercise training program, as determined by the physician for clearance to participate in combined exercise training program.</li> </ul>                                                                                                                                                                                                                                                                                                                                                                                                                                                                                                                   |
| <p>Exclusion<br/>Criteria</p> | <ul style="list-style-type: none"> <li>• A diagnosis of dementia.</li> <li>• Participants living in Nursing Homes or Adult Residential Facilities (Special Care Homes) will be excluded.</li> <li>• Serious underlying disease, which, in the opinion of the study physician excludes engagement in interventions or may interfere with the participant's ability to participate fully in the study.</li> <li>• Has had surgery within the last two months or has planned surgery in the coming 12 months that, deemed by the study physician, could interfere with the participant's vision, hearing, mobility or any other ability to participate in the study.</li> <li>• Has a history of intracranial surgery.</li> <li>• Regular Benzodiazepine use by a participant that the study physician determines to be significant enough to interfere with the participants ability to participate in the assessments and interventions in the study will be excluded.</li> <li>• Presence of major depression, schizophrenia, severe anxiety or drug/alcohol abuse or other medical illness that would prohibit them from safely participating in the study or may cause harm to the participant.</li> </ul> |

|                                  |                                                                                                                                                                                                                                                                                                                                                                                                                                                                                                                                                                                                                                                                                                                                                                                                                                                                                                                                                                                                                                                        |
|----------------------------------|--------------------------------------------------------------------------------------------------------------------------------------------------------------------------------------------------------------------------------------------------------------------------------------------------------------------------------------------------------------------------------------------------------------------------------------------------------------------------------------------------------------------------------------------------------------------------------------------------------------------------------------------------------------------------------------------------------------------------------------------------------------------------------------------------------------------------------------------------------------------------------------------------------------------------------------------------------------------------------------------------------------------------------------------------------|
|                                  | <ul style="list-style-type: none"> <li>• Current Parkinsonism or any neurological disorder with residual motor deficits (e.g. stroke with motor deficit), active musculoskeletal disorders (e.g. severe osteoarthritis of lower limbs) or history of knee/hip replacement affecting gait performance during the baseline assessment.</li> <li>• Severe visual and/or auditory impairment, which, according to the vision and hearing assessment, precludes the participant from engaging in the trial.</li> <li>• Intention to enroll in other clinical trials during the same time period.</li> <li>• Active participation in an organized and planned exercise program involving aerobic exercise and/or resistance training regimen in previous 6 months.</li> </ul>                                                                                                                                                                                                                                                                                |
| <p>Study Goal and Objectives</p> | <p>Overall Goals:</p> <ul style="list-style-type: none"> <li>• To examine feasibility and provide preliminary data on delivering combined physical exercise and cognitive training at home in older adults at risk of ADRD.</li> <li>• To examine participant’s preference for each intervention type and to correlate this with subsequent adherence across the trial.</li> <li>• To assess whether the combination of physical exercise with cognitive training is more effective than the individual interventions in improving cognition, frailty, mobility, sleep, diet, and mood.</li> </ul> <p>Objectives:</p> <p><b>Primary Feasibility Objectives.</b> Is it feasible to implement a 16-week home-based, multi-domain intervention program aimed at reducing the risk of ADRD in community-dwelling older adults and improving their global health?</p> <ul style="list-style-type: none"> <li>• <b>Adherence.</b> Adherence of study participants will be defined as attendance to a minimum of 75% of study assessment sessions.</li> </ul> |

1  
2  
3  
4  
5  
6  
7  
8  
9  
10  
11  
12  
13  
14  
15  
16  
17  
18  
19  
20  
21  
22  
23  
24  
25  
26  
27  
28  
29  
30  
31  
32  
33  
34  
35  
36  
37  
38  
39  
40  
41  
42  
43  
44  
45  
46  
47  
48  
49  
50  
51  
52  
53  
54  
55  
56  
57  
58  
59  
60

- 

**Secondary Feasibility Objectives:** Will participants adhere to the study protocol? How satisfied will participants be with the study at the end of the trial? What (if any) adverse events will occur during the trial?

- **Recruitment.** A successful recruitment rate is defined as the ability to recruit (and consent) a minimum of 75% of the total recruitment goal of 64 participants across all sites during the enrollment period
- **Retention.** A successful retention rate is defined as a minimum of 75% of the total number of recruited participants continuing to trial completion (at the immediate post intervention follow up session).
- **Experience and Satisfaction.** Experience and satisfaction will be defined as the results expressed by study participants in responses given to semi-structured interview questions that are designed using Kirkland's four-level model<sup>4</sup>. Used in numerous settings for program evaluation, this framework consists of four dimensions: reaction, learning, behavior, and results.
- **Adverse Events.** An adverse event is defined as any incident or adverse outcome that is unexpected, and related or possibly related to participation in the research study.
- **Data Loss.** Data loss due to technical failures, personnel errors, and participant non-compliance will be assessed. A minimum acceptable rate of missing data will set at <20%.

**Primary Analytic Objectives.** In order to determine if affinity for any one intervention is an important factor in participants' adherence to the study interventions, we designed the Intervention Preference Questionnaire (IPQ, Appendix A) that will be used to answer the question: Is interest level for a given intervention type correlated with subsequent adherence to the intervention? We will also use the IPQ to examine preference attitudes: Which intervention type (physical exercise or cognitive training) do the



|                                                                                                                                                                                                      |                                                                                                                                                                                                                                                                                                                                                                                                                                                                                                                                                                                                                                                                                                                                                                                                                                                                                                                 |
|------------------------------------------------------------------------------------------------------------------------------------------------------------------------------------------------------|-----------------------------------------------------------------------------------------------------------------------------------------------------------------------------------------------------------------------------------------------------------------------------------------------------------------------------------------------------------------------------------------------------------------------------------------------------------------------------------------------------------------------------------------------------------------------------------------------------------------------------------------------------------------------------------------------------------------------------------------------------------------------------------------------------------------------------------------------------------------------------------------------------------------|
| <p>1<br/>2<br/>3<br/>4<br/>5<br/>6<br/>7<br/>8<br/>9<br/>10<br/>11<br/>12<br/>13<br/>14<br/>15<br/>16<br/>17<br/>18<br/>19<br/>20<br/>21<br/>22<br/>23<br/>24<br/>25<br/>26<br/>27<br/>28<br/>29</p> | <p>majority of participants prefer over the other? What proportion of participants have no particular preference for either intervention? Do participants adhere better if they receive the active treatments they prefer? Do their attitudes change after completing the active interventions versus the control interventions?</p> <p><b>Secondary Analytic Objectives.</b> What is the estimated effect size (ES) of the interventions on cognitive improvement? What is the standard deviation of the outcome variable?</p> <ul style="list-style-type: none"> <li>• <b>Cognitive Improvement.</b> The ES for cognitive improvement will be defined using Cohen’s descriptors: 0.2 = small; 0.5 = moderate; 0.8 = large.</li> <li>• <b>Mobility Improvement.</b> Similarly, the ES for mobility improvement will be defined using Cohen’s descriptors: 0.2 = small; 0.5 = moderate; 0.8 = large.</li> </ul> |
| <p>30<br/>31<br/>32<br/>33<br/>34<br/>35<br/>36<br/>37<br/>38<br/>39<br/>40<br/>41<br/>42<br/>43<br/>44<br/>45<br/>46<br/>47<br/>48<br/>49<br/>50<br/>51<br/>52<br/>53<br/>54<br/>55<br/>56</p>      | <p>Outcome Measures</p> <p>Primary Feasibility Outcomes</p> <ul style="list-style-type: none"> <li>• <b>Adherence to Interventions.</b> Defined as the mean percent of all Intervention sessions attended of the 48 planned sessions per participant.</li> </ul> <p>Primary Analytic Outcome</p> <ul style="list-style-type: none"> <li>• <b>Preference.</b> The primary analytic goal of SYNERGIC@Home is to assess the relationship between participants’ adherence to the interventions and their affinity for each intervention going into the trial. All participants will be given the Intervention Preference Questionnaire (IPQ, Appendix A) prior to implementation of the intervention at baseline (T0) and after the 4mo intervention (T4).</li> </ul> <p>Secondary Feasibility Outcomes</p>                                                                                                         |

1  
2  
3  
4  
5  
6  
7  
8  
9  
10  
11  
12  
13  
14  
15  
16  
17  
18  
19  
20  
21  
22  
23  
24  
25  
26  
27  
28  
29  
30  
31  
32  
33  
34  
35  
36  
37  
38  
39  
40  
41  
42  
43  
44  
45  
46  
47  
48  
49  
50  
51  
52  
53  
54  
55  
56  
57  
58  
59  
60

- **Recruitment Enrollment Rate:** Defined as the total percent of enrolled participants relative to number of people screened for eligibility.
- **Enrollment Retention Rate:** Defined as the total percent of enrolled participants who continue throughout the trial and participate in outcomes assessments.
- **Assessment Tolerability:** Defined as no voluntary dropouts occurring either during or between baseline assessment and prior to allocation to an intervention group.
- **Trial Experience:** Defined as participants' qualitative responses to semi-structured open-ended questions aimed at providing insights on their overall trial experience within the context of the Kirkland evaluation framework.
- **Adverse Events:** Frequency cross-tabulation of AE severity versus AE relation to trial.
- **Data Loss:** Defined as data lost due to technical failures, personnel errors or participant non-compliance.

#### Secondary Analytic Outcomes

- **Cognitive Functioning.** Cognitive outcomes will be measured using the Cognitive Functional Composite 2 (CFC-2), the telephone version of the Telephone Cognitive Screening (TCogS), the remote version of the Montreal Cognitive Assessment (MoCA), and select items from the Alzheimer's Disease Assessment Scale-Cognitive (ADAS-Cog Plus) as part of our additional cognitive outcomes.
  - **CFC-2.** The CFC consists of the following validated tests<sup>5,6</sup>. The first three tests originate from the ADAS-Cog 13, which has been used as a primary outcome measure in numerous trials with individuals at risk for ADRDs and has recently been shown to be valid for remote use<sup>7-9</sup>: ADAS-Cog Immediate Word Recall, ADAS-Cog Delayed Word Recall, ADAS-Cog

|                                                                                                                                                                                                                                                                                                                                                                                                                               |                                                                                                                                                                                                                                                                                                                                                                                                                                                                                                                                                                                                                                                                                                                                                                                                                                                                                                                                                                                                                                                                                                                                                                                                                                                                                                                                                                                                                                                                                                                                                                                                                                                                                                                                                                                                                                                                                                                                                                                                                                                                    |
|-------------------------------------------------------------------------------------------------------------------------------------------------------------------------------------------------------------------------------------------------------------------------------------------------------------------------------------------------------------------------------------------------------------------------------|--------------------------------------------------------------------------------------------------------------------------------------------------------------------------------------------------------------------------------------------------------------------------------------------------------------------------------------------------------------------------------------------------------------------------------------------------------------------------------------------------------------------------------------------------------------------------------------------------------------------------------------------------------------------------------------------------------------------------------------------------------------------------------------------------------------------------------------------------------------------------------------------------------------------------------------------------------------------------------------------------------------------------------------------------------------------------------------------------------------------------------------------------------------------------------------------------------------------------------------------------------------------------------------------------------------------------------------------------------------------------------------------------------------------------------------------------------------------------------------------------------------------------------------------------------------------------------------------------------------------------------------------------------------------------------------------------------------------------------------------------------------------------------------------------------------------------------------------------------------------------------------------------------------------------------------------------------------------------------------------------------------------------------------------------------------------|
| <p>1<br/>2<br/>3<br/>4<br/>5<br/>6<br/>7<br/>8<br/>9<br/>10<br/>11<br/>12<br/>13<br/>14<br/>15<br/>16<br/>17<br/>18<br/>19<br/>20<br/>21<br/>22<br/>23<br/>24<br/>25<br/>26<br/>27<br/>28<br/>29<br/>30<br/>31<br/>32<br/>33<br/>34<br/>35<br/>36<br/>37<br/>38<br/>39<br/>40<br/>41<br/>42<br/>43<br/>44<br/>45<br/>46<br/>47<br/>48<br/>49<br/>50<br/>51<br/>52<br/>53<br/>54<br/>55<br/>56<br/>57<br/>58<br/>59<br/>60</p> | <p>Orientation, Clinical Dementia Rating scale Sum of Boxes cognitive portion (CDR-SB Cog), the Lawton-Brody Instrumental Activities of Daily Living (IADL) and the Functional Activities Questionnaire (FAQ).</p> <ul style="list-style-type: none"> <li>○ <b>Additional Cognitive Outcomes.</b> Additional cognitive outcomes include the Oral Trail Making Test (TMT) A &amp; B<sup>10</sup>, the 15-item Boston Naming Test (BNT)<sup>11</sup>, Logical Memory I &amp; II<sup>12</sup>, ADAS-Cog Word Recognition<sup>7-9</sup>, the Delis-Kaplan Executive Function System (DKEFS) phonemic fluency test, and The Delis-Kaplan Executive Function System (DKEFS) semantic fluency test<sup>13</sup>, the Digit Span Backward Test<sup>14</sup>, and oral version of the Digit Symbol Modalities Test<sup>15</sup>.</li> <li>● <b>Clinical and Mobility Outcomes.</b> Medications, blood pressure, heart rate, exercise routines, gait speed, dual task gait parameters, Sit to Stand Test (STST) performance, fear of falling, and fall history using self-reports of falls on a fall calendar.</li> <li>● <b>Sleep Patterns.</b> Sleep habits will be assessed using the 18-item Pittsburgh Sleep Quality Index (PSQI-18) and the Work and Sleep Diary (WSD)<sup>16</sup></li> <li>● <b>Diet Habits.</b> Diet habits will be assessed using the 14-item Mediterranean Diet Assessment (MDA-14) a short questionnaire for Vitamin D intake, and the Eating Pattern Self-Assessment.</li> <li>● <b>Functional Independence and Activity Level.</b> Additional descriptors of functional health and independence will also be tested including: the activities of daily living--using the Lawton-Brody Instrumental Activities of Daily Living (IADL) scale, the Physical Activity Scale for the Elderly (PASE), the Life Space Questionnaire (LSQ), and the Clinical Frailty Scale (CFS).</li> <li>● <b>Mental Health and Well-Being.</b> Mental health and well-being will be assessed using the Short Form quality of life questionnaire (SF-36),</li> </ul> |
|-------------------------------------------------------------------------------------------------------------------------------------------------------------------------------------------------------------------------------------------------------------------------------------------------------------------------------------------------------------------------------------------------------------------------------|--------------------------------------------------------------------------------------------------------------------------------------------------------------------------------------------------------------------------------------------------------------------------------------------------------------------------------------------------------------------------------------------------------------------------------------------------------------------------------------------------------------------------------------------------------------------------------------------------------------------------------------------------------------------------------------------------------------------------------------------------------------------------------------------------------------------------------------------------------------------------------------------------------------------------------------------------------------------------------------------------------------------------------------------------------------------------------------------------------------------------------------------------------------------------------------------------------------------------------------------------------------------------------------------------------------------------------------------------------------------------------------------------------------------------------------------------------------------------------------------------------------------------------------------------------------------------------------------------------------------------------------------------------------------------------------------------------------------------------------------------------------------------------------------------------------------------------------------------------------------------------------------------------------------------------------------------------------------------------------------------------------------------------------------------------------------|

|                                   |                                                                                                                                                                                                                                                                                                                                                                                                                                                                                                                                                                                                                                                                                         |
|-----------------------------------|-----------------------------------------------------------------------------------------------------------------------------------------------------------------------------------------------------------------------------------------------------------------------------------------------------------------------------------------------------------------------------------------------------------------------------------------------------------------------------------------------------------------------------------------------------------------------------------------------------------------------------------------------------------------------------------------|
|                                   | <p>the Generalized Anxiety Disorder 7 (GAD 7), Geriatric Depression Scale (GDS-30), and the COVID-19 Questionnaires.</p> <ul style="list-style-type: none"> <li>• <b>Health Literacy.</b> Health literacy will be assessed using the Short Test of Functional Health Literacy in Adults (STOFHLA).</li> <li>• <b>Technology Use and Ability.</b> Participant's level of technology use and ability will be assessed using the Functional Assessment of Currently Employed Technology Scale (FACETS).</li> </ul>                                                                                                                                                                         |
| <p>Data<br/>Analysis<br/>Plan</p> | <p>Primary Analyses</p> <p>1- Primary Feasibility Outcome: Adherence to the interventions will be analyzed using a one-sample t-test that will test the hypothesis that participants complete at least 36 of the 48 (75%) scheduled interventions sessions. This test will be used to determine if the adherence is similar to hypothesized, better than hypothesized or worse than hypothesized.</p> <p>2- Primary Analytic Outcome: We will examine the relationship between interest level in and adherence to the interventions using Pearson's r. This analysis will tell us if adherence to the trial is related to participants' affinity for any one or more interventions.</p> |
| <p>Significance</p>               | <p>In today's technological age, it is becoming more possible than ever to conduct impactful research with participants virtually. A home-based intervention program for older adults at risk for ADRDs has the advantages of allowing participants the freedom, flexibility and comfort to participate from their home—and may potentially lead to enhanced recruitment, retention and reduce social isolation.</p>                                                                                                                                                                                                                                                                    |

## 2. ABSTRACT

**BACKGROUND:** Nearly half a million Canadians live with Alzheimer's Disease and Related Dementias (ADRDs), and approximately one third of those cases could have been prevented with early intervention. Early intervention is best applied in pre-dementia states such as in individuals with mild cognitive impairment (MCI)<sup>1,17,18</sup> and those at risk for developing dementia<sup>19-21</sup>. Physical exercise and cognitive training are emerging interventions that have the potential to enhance cognitive function and mobility in older adults with MCI. The SYNERGIC trial (SYNchronizing Exercises, Remedies in Galt and Cognition), a large multi-site randomized control trial, showed promising preliminary data that individuals in an active exercise intervention combining aerobic exercise with progressive resistance training (AE+RT) *and* in a cognitive training program (NEUROPEAK<sup>TM</sup>) had better cognitive outcomes than a balance and toning control (BAT) intervention paired with a control cognitive intervention consisting of website searching and watching a simple video (WS+V)<sup>22,23</sup>. While these interventions were provided face to face in a research facility, little is known about the feasibility of delivering these multi-domain interventions at home in older adults at risk for developing ADRDs. Thus, the primary goals of the SYNERGIC@Home feasibility study are to assess the feasibility of the home-based approach and to evaluate the relationship between participant's intervention preferences and their subsequent adherence. Secondary objectives will include the effect of the interventions on cognition, frailty, mobility, sleep, and diet.

**METHODS:** The SYNERGIC@Home feasibility trial is a randomized control trial (RCT) that will follow a 2 x 2 factorial design, with a 16-week home-based intervention program of combined physical exercises with cognitive training. Sixty-four participants will be randomized in blocks of four to one of the following four arms: 1) combined exercise (AE+RT) + cognitive training (NEUROPEAK<sup>TM</sup>); 2) combined exercise (AE+RT) + control cognitive training (WS+V); 3) Control exercise (BAT) + cognitive training (NEUROPEAK<sup>TM</sup>) ; and 4) Control exercise (BAT) + control cognitive training (WS+V). SYNERGIC@Home will be implemented entirely virtually through video and phone conferencing. Baseline, immediate post-intervention follow-up, and 6-month post-intervention follow-up assessments will include measures of cognition, frailty, mobility, sleep, diet, and psychological health. For primary feasibility objectives, we will obtain measures of recruitment and retention rates. For primary analytic objectives, we will

1  
2 examine the distribution of preference ratings and determine if there is a relationship between  
3 preference for a given intervention and subsequent adherence. A series of secondary analytic  
4 outcomes examining the potential effect of the individual and combined interventions on  
5 cognitive, mobility, and general well-being will be measured at both baseline and follow-up. If  
6 we find a relatively equal split in sex our sample, we will conduct gender-based analyses as  
7 additional, exploratory research.  
8  
9  
10  
11  
12

13 **EXPECTED RESULTS AND DISCUSSION:** The SYNERGIC@Home trial will  
14 establish the feasibility of a combined multimodal intervention program delivered at home in  
15 older adults. Similarly, it will estimate the frequency and strength of participant preference for  
16 different interventions and delineate the relationship between intervention preference and  
17 subsequent adherence. It will also build capacity for and pilot the delivery of multi-domain  
18 interventions using an entirely home-based protocol with individuals at risk for ADRDs. The  
19 SYNERGIC@Home trial will inform future larger scale studies on the feasibility and success of  
20 implementing home-based interventions for individuals at risk for ADRDs. Insights gained from  
21 this feasibility trial will be instrumental in developing various other at home, remote, and virtual  
22 intervention programs for community-dwelling older adults.  
23  
24  
25  
26  
27  
28  
29  
30  
31  
32  
33  
34

35 **Keywords:** Exercise, cognitive training, intervention preference, cognition, gait, dementia,  
36 elderly, home-based intervention program.  
37  
38  
39  
40  
41  
42  
43  
44  
45  
46  
47  
48  
49  
50  
51  
52  
53  
54  
55  
56  
57  
58  
59  
60

### 3. BACKGROUND

In 2015, over 46 million people lived with Alzheimer's Disease and Related Dementias (ADRDs) worldwide, with 1 new case appearing every 4.1 seconds<sup>1</sup>. The cost associated with these cases is over a trillion Canadian dollars<sup>1,24,25</sup>. There is no cure for dementia<sup>26</sup>. Recently, there has been an important shift in interventional studies on ADRDs to targeting early stages or pre-dementia states, such as individuals with mild cognitive impairment (MCI)<sup>27,28</sup>. The SYNERGIC Trial (SYNchronizing Exercises, Remedies in Galt and Cognition) implemented a multi-domain intervention study design on individuals with MCI at various sites across Canada in Ontario, Québec, and British Columbia<sup>22</sup> in both English and in French. The success of the SYNERGIC trial has warranted pilot testing of a similar intervention design to be provided at home across other sites. This protocol is the new application of the SYNERGIC@Home (SYNERGIE~chez soi) feasibility trial—a home-based version of the protocol to be implemented by researchers in New Brunswick. SYNERGIC@Home (SYNERGIE~chez soi) will assess the feasibility of a protocol and intervention future home-based intervention programs. It has added assessments of preference to evaluate the relationship between preference for interventions and subsequent adherence, and it will ultimately inform on the logistics of delivering a remote, home-based intervention to individuals at risk for developing ADRDs.

#### 3.1 RATIONALE OF THE INTERVENTIONS

The preliminary success of the original SYNERGIC program, as well as similar interventions in the literature, have illustrated that non pharmacological interventions to enhance cognition for older adults at risk of developing ADRDs that include physical exercise and cognitive training are very promising<sup>21-23,29</sup>. The rationale for each type of intervention to improve cognition in older adults at risk for developing ADRDs is as follows.

##### 3.1.1 Physical Exercise

Aerobic exercise (AE) and progressive resistance training (RT) have been shown to improve cognitive outcomes, along with improved physical capacity and mobility in older

1 adults.<sup>30-33</sup> Both, AE<sup>34</sup> and RT<sup>35</sup> trials have reported positive results in improving  
2 cognitive performance, with consistent findings also observed after AE interventions  
3 lasting more than 3 months.<sup>30,36</sup> RT has been studied less extensively than aerobic  
4 training in older adults, particularly in those at risk for developing ADRDs.  
5  
6  
7

### 8 9 **3.1.2 Cognitive Training**

10  
11  
12 Cognitive training delivered using the NEUROPEAK™ protocol of the SYNERGIC trial  
13 (e.g., a computer based cognitive process training) may improve cognition, mobility, and  
14 postural control in older adults. The NEUROPEAK™ program will be used by  
15 participants via a program downloaded onto participant's home computers and/or  
16 iPad/Android tablet and will consist of a dual-task cognitive training regimen designed  
17 by our group that has demonstrated that this type of training can also improve balance  
18 in healthy older adults.<sup>37</sup> The rationale for implementing cognitive training in both the  
19 SYNERGIC trial and this SYNERGIC@Home trial stems from a plethora of recent  
20 research suggesting that improvements in brain plasticity occur after cognitive  
21 training.<sup>38-40</sup>  
22  
23  
24  
25  
26  
27  
28  
29  
30

### 31 **3.1.3 Combined Physical Exercise and Cognitive Training**

32  
33 In addition to the benefits of each intervention alone—there is growing evidence that  
34 combining them may lead to a synergic effect as shown in the preliminary analyses of  
35 the SYNERGIC trial.<sup>41-43</sup> A recent systematic review of the literature on randomized  
36 control trials found that **sequential and simultaneous** combinations of physical exercise  
37 and cognitive training show positive effects on cognition **compared to exercise alone or**  
38 **cognitive training alone**. Factors such as intervention intensity and frequency were  
39 found to be important in facilitating positive outcomes post intervention.<sup>44</sup>  
40  
41  
42  
43  
44  
45

46 Mechanistically, improvements in cognitive functioning are likely the result of changes in  
47 neurological factors that improve the brain's functional and structural integrity.  
48  
49  
50  
51  
52

53 Interventions that include both cognitive and physical exercises show marked benefits  
54 to the brain's structural integrity and can be instrumental in delaying  
55  
56  
57



1 neurodegeneration.<sup>45</sup> Combined physical exercise and cognitive training interventions  
2 have also been shown to confer improvements in gait parameters, such as walking  
3 speed in older adults.<sup>46</sup> A recent systematic review conceptualizing the literature on  
4 combined exercise and cognitive training interventions showed that combined  
5 interventions significantly improve gait speed, cognitive functioning, and balance in  
6 individuals with MCI<sup>47</sup>.

7  
8  
9  
10  
11  
12  
13 Based on the literature supporting the efficacy of cognitive and exercise-based  
14 interventions with individuals at risk for ADRDs—we plan to implement similar  
15 interventions in older adults at risk for ADRDs. The critical difference between the  
16 SYNERGIC@Home study and other intervention programs discussed thus far is the  
17 home-based, virtual nature of SYNERGIC@Home. Thus, the primary goal for the  
18 SYNERGIC@Home feasibility study is to evaluate the feasibility of administering a  
19 combined exercise and cognitive training home-based program through remote  
20 interfaces for older adults at risk for developing ADRDs.

### 21 22 23 24 25 26 27 28 **3.1.4 Rationale for Polygenic Hazard Score Testing**

29  
30 MCI is alarmingly prevalent in older populations with over half of individuals with MCI  
31 progressing to dementia within five years.<sup>48</sup> There is a growing body of recent evidence  
32 suggesting that a cluster of genetic risk factors are associated with the onset of  
33 dementia.<sup>49</sup> Specifically, in genome wide association studies (GWAS), a specific allelic  
34 expression in 31 single nucleotide polymorphisms (SNPs) appears to be effective in  
35 quantifying individual differences in age-specific risk for dementia; this allelic  
36 combination is termed an individual's Polygenic Hazard Score (PHS), or sometimes  
37 referred to as an individual's Polygenic Risk Score (PRS).<sup>50</sup> In light of the fact that  
38 participants in the SYNERGIC@Home study will predominantly consist of individuals at  
39 risk for dementia (such as individuals with MCI), one of the research goals of the study  
40 is to assess the distribution of PRS/PHS in the study sample. This data will be  
41 instrumental in delineating research questions pertaining to efficacy of the study  
42 interventions as a function of cognitive risk. Any analyses done with PRS/PHS data will  
43 be conducted only during the analysis stage of the research project and will only be  
44  
45  
46  
47  
48  
49  
50  
51  
52  
53  
54  
55  
56  
57  
58  
59  
60

1 done by research personnel within the study team. The PRS/PHS is currently in the  
2 research stages and is not part of routine clinical care at this time.  
3  
4

### 5 6 **3.2 SIGNIFICANCE OF THE SYNERGIC@HOME TRIAL** 7

8 In addition to the convenience of participating in research from the comfort of one's  
9 home, there are critical health considerations that uniquely justify the home-based  
10 nature of the SYNERGIC@Home feasibility study. In light of the COVID-19 pandemic of  
11 2020 and the associated risks of exposure for older populations, SYNERGIC@Home  
12 allows for safe administration of interventions for older individuals at risk for ADRDs. To  
13 ensure the safety of our participants, we are planning to administer all interventions  
14 (including exercise and cognitive training) using a home-based protocol. The primary  
15 platform that we will use is *Zoom for Healthcare*®. Members of the research team will  
16 conduct the video-conferences with participants using Zoom for Healthcare® which  
17 protects participants' confidentiality through a secured encryption method. Study  
18 participants will be assisted by research team members to set up the easy to use Zoom  
19 platform on their personal computers or laptop devices. This home-based approach will  
20 allow participants to connect with the research team remotely. This feat will not only  
21 address the feasibility goals of SYNERGIC@Home, but it will also give older individuals  
22 an opportunity to connect with others. This is particularly important at a time during  
23 which physical distancing measures may be contributing significantly to the isolation  
24 and loneliness in older populations at this time.  
25  
26  
27  
28  
29  
30  
31  
32  
33  
34  
35  
36  
37

38 We plan to pioneer a flexible home-based program for at-risk individuals and  
39 demonstrate the feasibility of implementing this innovative trial with researchers in New  
40 Brunswick. SYNERGIC@Home will obtain valuable insights on the logistics of a home-  
41 based intervention program in individuals at risk for developing dementia. The insights  
42 gained from this feasibility study can be applied to inform future larger scale projects  
43 with similar goals. SYNERGIC@Home will be among the first to pilot a home-based  
44 combined exercise and cognitive training program in a randomized control trial for older  
45 adults at risk for developing ADRDs.  
46  
47  
48  
49  
50  
51  
52  
53  
54  
55  
56  
57

## 4. RESEARCH QUESTIONS AND OBJECTIVES

All feasibility objectives are consistent with current recommendations on conducting feasibility trials.<sup>51</sup> The overarching question is: Is it feasible to implement a 16-week home-based, multi-domain intervention program to improve health and reduce the risk of ADRDs in community-dwelling older adults?

### 4.1 PRIMARY FEASIBILITY OBJECTIVES

It is well known that the benefits of exercise, whether physical or cognitive, can only be realized if one engages in the practice. Our primary feasibility outcome is to answer the question: Will participants adhere to the study protocol? Is it feasible to implement a 16-week home-based, multi-domain intervention program to improve health and reduce the risk of ADRDs in community-dwelling older adults?

#### 4.1.1 Intervention Adherence

Minimum acceptable adherence of study participants will be defined as attendance to at least 75% of intervention sessions.

### 4.2 SECONDARY FEASIBILITY OBJECTIVES

Our secondary feasibility objectives are aimed at evaluating a variety of other feasibility outcomes to answer questions such as: How difficult is it to recruit seniors to a home-based intervention, and do they remain in the study for its duration? Will they tolerate the extensive battery of testing at baseline? How satisfied will participants be with the interventions? What (if any) adverse events are related to the intervention(s)? What is the rate of data loss/missing data?

#### 4.2.1 Recruitment Rate

A successful recruitment rate is defined as the ability to recruit and consent a minimum of 75% of the total recruitment goal of 64 participants during the enrollment period.

#### 4.2.2 Retention Rate

A successful retention rate is defined as a minimum of 75% of the total number of consented participants continuing to intervention completion (at the immediate post intervention follow up session).

#### 4.2.3 Assessment Tolerability

Successful assessment tolerability is defined as no voluntary dropouts occurring either during or between baseline assessment (both clinical and activity assessment batteries) and prior to allocation to an intervention group.

#### 4.2.4 Trial Experience

Trial experience will be defined as a participant's overall experience and satisfaction with the presentation, organization, content, and participation in the SYNERGIC@Home feasibility study.

#### 4.2.5 Adverse Events

Frequency of Adverse Events (AEs) will be documented throughout the trial and analyzed by severity of the AE and suspected relationship to the trial to determine if AEs are greater than chance in the active treatment arms.

#### 4.2.6 Data Loss

Data loss due to technical failures, personnel errors, and participant non-compliance will be assessed. A minimum acceptable rate of missing data will set at <20%.

### 4.3. PRIMARY ANALYTIC OBJECTIVES

In order to determine if affinity for any one intervention is an important factor in participants' adherence to the study interventions, we designed the Intervention Preference Questionnaire (IPQ, Appendix A) that will be used to answer the question: Is interest level for a given intervention type correlated with subsequent adherence to the intervention?

We will also use the IPQ to examine preference attitudes: Which intervention type (physical exercise or cognitive training) do the majority of participants prefer over the other? What proportion of participants have no particular preference for either

1 intervention? Do participants adhere better if they receive the active treatments they  
2 prefer? Do their attitudes change after completing the active interventions versus the  
3 control interventions?  
4  
5

#### 6 7 8 **4.4. SECONDARY ANALYTIC OBJECTIVES**

9  
10 What is the estimated effect size (ES)? What is the standard deviation of the outcome  
11 variable?  
12  
13

##### 14 15 **4.4.1. Cognitive Improvement**

16 The ES for cognitive improvement will be defined using Cohen's descriptors: 0.2 =  
17 small; 0.5 = moderate; 0.8 = large.  
18  
19

##### 20 21 **4.4.2. Mobility Improvement.**

22 Similarly, the ES for mobility improvement will be defined using Cohen's descriptors: 0.2  
23 = small; 0.5 = moderate; 0.8 = large.  
24  
25  
26  
27  
28  
29  
30

## 31 **5. METHODS/DESIGN**

### 32 33 **5.1 STUDY DESIGN**

#### 34 35 **5.1.1 Treatment Arms**

36 The SYNERGIC@Home feasibility trial is a home-based, randomized, phase II, four-  
37 arm factorial design (2x2), double-blind control study. The SYNERGIC@Home  
38 feasibility trial will be administered virtually through *Zoom for Healthcare*® (an online  
39 video conferencing platform). A total of 64 participants at risk for ADRDs, aged 60 to 90  
40 years of age will be enrolled and randomized, block randomization by four, into one of  
41 four arms (**Figure 1**), with 16 participants in each arm. Details pertaining to intervention  
42 and control conditions for both physical exercise and cognitive training are described in  
43 section 8.  
44  
45  
46  
47  
48  
49  
50  
51

52  
53 **Arm 1: Combined exercise (AE+RT) + Cognitive training (Neuropeak™).**

54 **Arm 2: Combined exercise (AE+RT) + Control cognitive training (WS+V).**  
55  
56  
57

1 Arm 3: Control exercise (BAT) + **Cognitive training (Neuropeak™)**.

2  
3 Arm 4: Control exercise (BAT) + Control cognitive training (WS+V).

4  
5  
6 Note: Experimental conditions are in bold. Arm 4 includes only the control interventions.

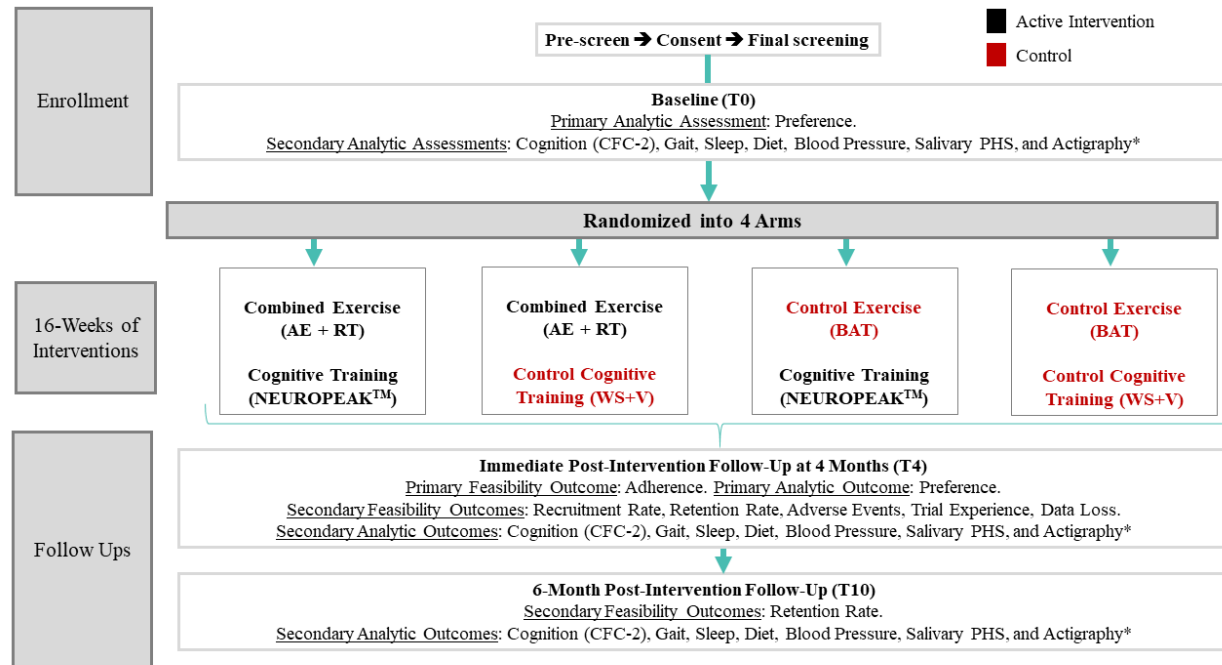

35 AE: aerobic exercise, RT: resistance training; BAT = Balance and toning; WS+V = Web search and video; PHS = Polygenic Hazard Score; \*Using ActiGraph GT9X.

36  
37  
38 **Figure 1. Design of the SYNERGIC@Home trial.**

### 39 5.1.2 Study Sequence and Duration

40  
41  
42  
43  
44 Participants will mainly be informed through clinicians as well as recruitment pamphlets  
45 in the community or by advertisement on different medias (see 5.2.5 Strategies for  
46 Recruitment), potential participants who express an interest in learning more about the  
47 clinical trial will be contacted by the research coordinator for the study. A general  
48 overview of the study will be discussed and a Prescreening Questionnaire will be  
49 completed. This will be used to determine if the participant is eligible to be screened.  
50 This will also provide information about why potentially interested individuals are not  
51  
52  
53  
54  
55  
56  
57

1 able to be screened. This will provide useful information to inform future recruitment  
2 efforts in future studies testing these interventions.  
3  
4

5  
6 During this prescreen, potential participants will be asked if they would prefer to  
7 participant in this study in either French or English. This study has the capacity to offer  
8 this in both official languages in New Brunswick. Those who wish to participate in  
9 English will be directed to the research coordinator site in Horizon Health Network and  
10 those who would prefer to participate in French will be directed to the research  
11 coordinator the site in Vitalité Health Network.  
12  
13  
14  
15

16  
17 Following prescreening, informed consent will be obtained and assessments will be  
18 done during multiple visits: Screening, Baseline (T0), Immediate post intervention  
19 follow-up at 4 months (T4), and 6-month post-intervention follow-up (T10).  
20  
21  
22

- 23  
24 • **Screening Assessment** – This assessment will be completed over four separate  
25 time:  
26
  - 27 ○ **Consent and clinical screening:** The potential participant meets virtually  
28 (via *Zoom for Healthcare*©) with the Clinical Research Coordinator/nurse  
29 and completes the consenting process. The study physician will be  
30 available to answer questions that require physician involvement during  
31 the informed consent process. Consent forms will be sent to participants  
32 via email if participant has access to a printer and scanner and via mail  
33 otherwise. Consenting participants will provide written consent and send  
34 back with regular mail their signed consent form. After the research  
35 coordinator received the consent, a copy will be sent back to the  
36 participant and the assessments will be done by the Clinical Research  
37 Coordinator. This is expected to take 2 hours.  
38
  - 39 ○ **Activity (mobility) screening:** The participant meets virtually (via *Zoom*  
40 for Healthcare©) with the Kinesiology Research Assist who will conduct a  
41 battery of mobility and lifestyle assessments (see section 6.4.7). This is  
42 expected to take 2 hours.  
43
  - 44 ○ **Clinical Case Conference and enrollment:** The participant will meet  
45 again virtually (via *Zoom for Healthcare*©) with the Clinical Research  
46  
47  
48  
49  
50  
51  
52  
53  
54  
55  
56  
57

Coordinator/Nurse and the Study Physician who will review the results of all of the assessments and finalize the inclusion and exclusion criteria.

This is expected to take 1 hour. If the participant is eligible, their baseline assessment visits are scheduled.

- Baseline Assessment (T0) – will be done within 2 weeks of successful enrollment.
- Part of the baseline assessment will consist of actigraphy monitoring for sleep and physical activity levels and two separate assessment visits:
  - **Actigraphy monitoring:** Participants will wear an ActiGraph monitor on their wrist at all times (except when bathing) for 10 consecutive days before their baseline assessment, to measure their sleep patterns and daily activity levels (see section 6.4.7). The instructions and materials needed for this monitoring will be mailed out to the participant and the research coordinator, who will meet with the participant to review the instructions.
  - **Clinical assessment:** The participants meets virtually (via *Zoom for Healthcare*©) with the Clinical Research Coordinator/Nurse who will conduct additional assessments (see Table 2). This is expected to take 2 hours.
- Randomization occurs after the Baseline assessment by allocating the participant to a treatment group from a pre-determined block-randomized sequence (see section 8.3).
- Intervention Phase (T0-T4) – Will start within 2 weeks of completion of the Baseline Assessment. The intervention will continue 3x per week for 16 weeks (see Section 8), for a total of 48 virtual sessions.
- Immediate Post-Intervention Assessment (T4) –Within 2 weeks of completion of the 16 week intervention, participants will wear the ActiGraph for 10 consecutive days. They will also undergo clinical and activity assessment in two separate visits, as described for baseline. (See Table 2) Each assessment visit is expected to take 2 hours.
- Six month Post Intervention Assessment (T10) – Within 2 weeks of the 6 month date after completion of the intervention the participants will wear the ActiGraph



again for 10 consecutive. They will also have the clinical and activity assessments in two separate virtual visits repeated. See Table 2. Each assessment visit is expected to take 2 hours.

Figure 2 shows the sequence of activities and their expected durations.

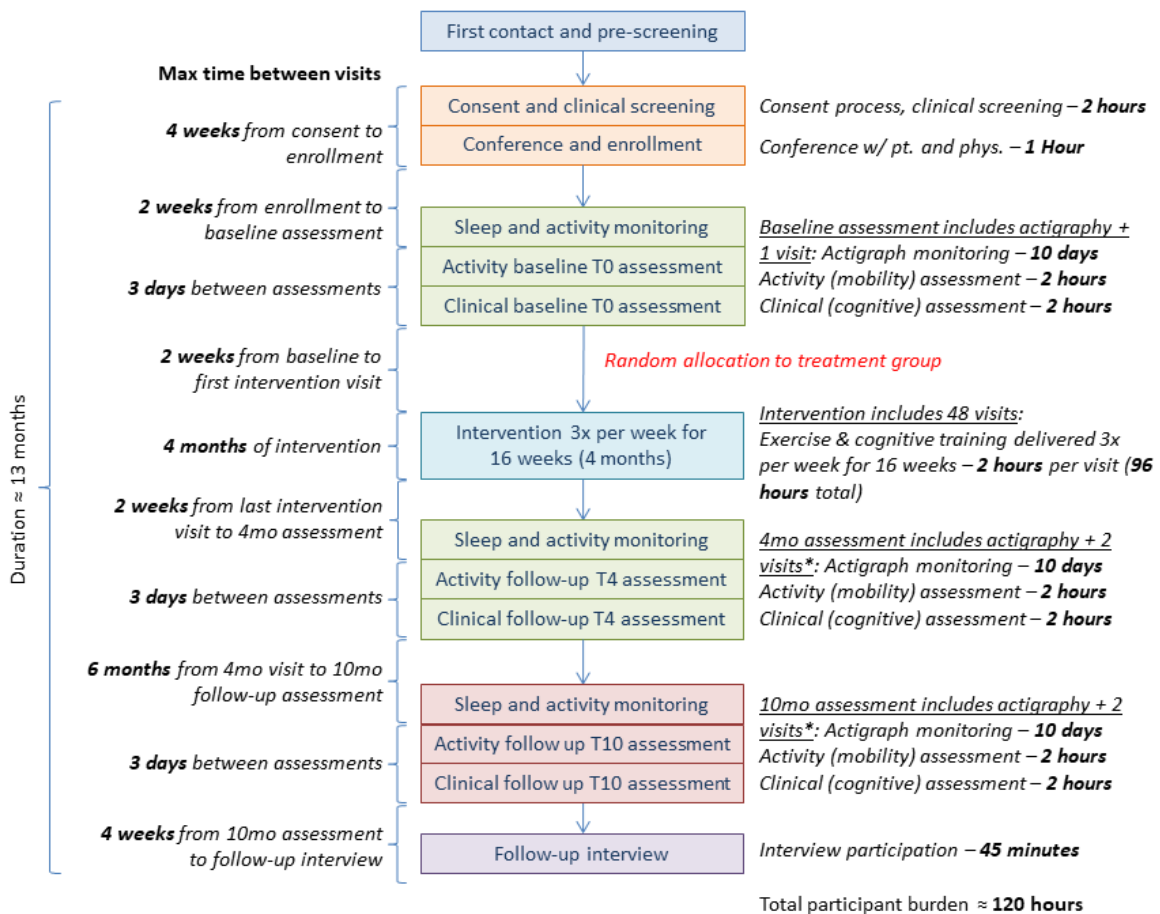

\* Time between clinical and activity sessions will be kept within 3 days with an allowable range of 1-7 days.

**Figure 2. Participant timeline through the trial.**

### 5.1.3 Setting

Participants will be recruited from across the entire province of New Brunswick, Canada. Participants must be residing and have a mailing address in New Brunswick. They will be living in their own homes in the community. Participants can be either Anglophone or Francophone. All study assessments and interventions will be done virtually (via video conferencing through *Zoom for Healthcare*®), in the language of the

1 participant's choice, by a research team member from the University of New Brunswick  
2 (Fredericton), Université de Moncton, Horizon Health Network, and/or Vitalité Health  
3 Network.  
4  
5

## 6 7 8 **5.2 STUDY POPULATION** 9

10 The target recruitment is N = 64 older adults aged 60 to 90 years old at risk of  
11 developing ADRDs who meet the following inclusion and exclusion criteria. Medical and  
12 clinical information will be collected by self-report by the participant. If clarification is  
13 needed regarding this clinical information, contact will be made with the participant's  
14 primary care physician/provider with the consent of the participant. Although we will  
15 make every effort to recruit equal numbers of Anglophone and Francophone  
16 participants, due to provincial distribution it may be expected that only 25-30% of  
17 recruits will be Francophone, therefore we will set a minimum recruitment of  
18 Francophone participants at 18 and maximum Anglophone recruitment at 46.  
19  
20  
21  
22  
23  
24  
25

### 26 27 **5.2.1 Inclusion Criteria** 28

29 Participants must meet each of the following criteria for enrolment into the study:  
30

- 31 • Age 60 to 90 years old.
- 32 • Has a Family Physician or a Nurse Practitioner.
- 33 • Has internet access (and have regular access to email), and the technology  
34 ability (able to send and receive emails).
- 35 • Resides in their own home/apartment in the community.
- 36 • Has access to a home computer and/or a laptop computer device.
- 37 • Self-reported levels of proficiency in English and/or French for speaking and  
38 understanding spoken and written language.
- 39 • Able to comply with scheduled home-based assessments, interventions, and  
40 other trial procedures.
- 41 • Able to ambulate at least 10 m independently with or without a walking aid.
- 42 • Being at risk of developing dementia:
  - 43 a) **Mild Cognitive Impairment (MCI) Group.** Diagnosis of Mild Cognitive  
44 Impairment, in accordance with the criteria used in the Comprehensive  
45  
46  
47  
48  
49  
50  
51  
52  
53  
54  
55  
56  
57

1 Assessment of Neurodegeneration and Dementia (COMPASS-ND) study<sup>2</sup>  
2 (Table 1).  
3

4  
5 b) **Subjective Cognitive Impairment (SCI) Group.** Diagnosis of Subjective  
6 Cognitive Impairment, in accordance with the COMPASS-ND study<sup>2</sup>  
7 definition (Table 1).  
8

9  
10 c) **Cognitively Intact with Risk Factors Group.** Cognitively Intact based on  
11 COMPASS ND study<sup>2</sup> definition (Table 1)) **AND** have a history of **two or**  
12 **more risk factors** for dementia, defined as the following (Table 1):  
13

- 14  **Obesity:** Defined as a Body Mass Index (BMI) > 30 kg/m<sup>2</sup> (as  
15 derived from the National Institute of Health BMI calculator<sup>52</sup>)
- 16  **Hypertension:** Defined as a documented Systolic Blood Pressure  
17 > 140 mm Hg, OR a physician's diagnosis of hypertension, OR  
18 presence of physician prescribed medical treatment for  
19 hypertension, OR other approaches to treatment for hypertension  
20 (i.e., diet or exercise).  
21
- 22  **Diabetes:** Defined as a physician's diagnosis of diabetes, OR  
23 presence of physician prescribed medical treatment for diabetes,  
24 OR other approaches to treatment for diabetes (i.e., diet or  
25 exercise).  
26
- 27  **Cardiovascular disease:** Defined as a physician's diagnosis of  
28 angina, myocardial infarction, coronary revascularization or other  
29 arterial revascularization, stroke, transient ischemic attack and/or  
30 peripheral vascular disease.  
31
- 32  **Physical inactivity:** Defined as inactive, whereby active is defined  
33 as engaging in a minimum of 20-30 minutes of physical activity  
34 causing sweating and breathlessness, at least two times per week.
- 35  **First-degree family history of dementia:** Defined as a physician's  
36 diagnosis of dementia in a first-degree relative, including a parent,  
37 sibling, or child.  
38
- 39  **Dyslipidemia:** Defined as a documented total cholesterol > 6.5  
40 mmol/L, OR a physician's diagnosis of hypercholesterolemia, OR  
41 presence of physician prescribed medical treatment for  
42  
43  
44  
45  
46  
47  
48  
49  
50  
51  
52  
53  
54  
55  
56  
57

hypercholesterolemia, OR other approaches to treatment (e.g. diet, exercise).

- **Poor sleep:** Defined as a score of 6 or higher on the PSQI-18 (higher scores indicate poorer sleep).
- **Poor diet:** Defined as a score of 7 or less on the MDA-14.
- Must be medically able to participate in the study's exercise training program, as by the study physician for clearance to participate in combined exercise training program.
- Preserved activities of daily living, operationalized as a score of > 14/23 on the Lawton-Brody Instrumental Activities of Daily Living (IADL) scale<sup>3</sup> and confirmed by clinician's interviews.

**Table 1.** Canadian Consortium on Neurodegeneration in Aging (CCNA) Criteria for Cognitively Intact with risk factors, and Subjective and Mild Cognitive Impairment from COMPASS-ND<sup>2</sup>

| Group                                                     | Core Diagnostic Criteria                                                                                                                                                                 | Operationalized as                                                                                                                                                                                                                                                                                                                                                                                                         |
|-----------------------------------------------------------|------------------------------------------------------------------------------------------------------------------------------------------------------------------------------------------|----------------------------------------------------------------------------------------------------------------------------------------------------------------------------------------------------------------------------------------------------------------------------------------------------------------------------------------------------------------------------------------------------------------------------|
| <b>Cognitively Intact (CI) with risk factors</b>          | Absence of SCI and/or MCI based on below definitions, with two or more known risk factors for dementia.                                                                                  | Not having SCI or MCI, and having at least two (2) of the following risk factors: <ul style="list-style-type: none"> <li>• Obesity</li> <li>• Hypertension</li> <li>• Diabetes</li> <li>• Cardiovascular disease</li> <li>• Physical inactivity</li> <li>• First-degree family history of dementia</li> <li>• Dyslipidemia</li> <li>• Poor sleep</li> <li>• Poor diet</li> </ul>                                           |
| <b>Subjective Cognitive Impairment (SCI)<sup>54</sup></b> | Self-experienced persistent decline in cognitive capacity in comparison with a previously normal status and unrelated to an acute event.                                                 | Answer "yes" to both of the following questions: "Do you feel like your memory or thinking is becoming worse?" and "Does this concern you?"                                                                                                                                                                                                                                                                                |
|                                                           | Normal age-, sex-, and education-adjusted performance on standardized cognitive tests, which are used to classify mild cognitive impairment (MCI) or prodromal Alzheimer's Disease (AD). | Global Clinical Dementia Rating (CDR) scale = 0, Logical Memory II above Alzheimer's Disease Neuroimaging Initiative (ADNI) education-adjusted cutoffs ( $\geq 9$ for 16+ years of education; $\geq 5$ for 8-15 years of education; $\geq 3$ for 0-7 years of education); Alzheimer's Disease Assessment Scale-Cognitive(ADAS-Cog) word list recall score >5; Montreal Cognitive Assessment (MoCA) total score $\geq 25$ . |

|                                                     |                                                       |                                                                                                                                                                                                                                                                                                                                                                                                                 |
|-----------------------------------------------------|-------------------------------------------------------|-----------------------------------------------------------------------------------------------------------------------------------------------------------------------------------------------------------------------------------------------------------------------------------------------------------------------------------------------------------------------------------------------------------------|
| <b>Mild Cognitive Impairment (MCI)<sup>27</sup></b> | Concern regarding a change in cognition.              | Report from patient and/or informant of such.                                                                                                                                                                                                                                                                                                                                                                   |
|                                                     | Impairment in one or more cognitive domains.          | One or more of the following: <ul style="list-style-type: none"> <li>• Logical memory below ADNI cutoffs (<math>\geq 9</math> for 16+ years of education; <math>\geq 5</math> for 8-15 years of education; <math>\geq 3</math> for 0-7 years of education).</li> <li>• ADAS-Cog word list recall <math>&lt;6</math>.</li> <li>• MoCA score 13-24 inclusive.</li> <li>• Global CDR<math>&gt;0</math>.</li> </ul> |
|                                                     | Preservation of independence in functional abilities. | Score $>14/23$ on the Lawton-Brody Instrumental Activities of Daily Living (IADL) scale.                                                                                                                                                                                                                                                                                                                        |
|                                                     | Not demented.                                         | Global CDR $\leq 0.5$ .                                                                                                                                                                                                                                                                                                                                                                                         |

### 5.2.2 Exclusion Criteria

Participants who meet **ANY** of the following criteria will be excluded from the study:

- A diagnosis of dementia
- Participants living in Nursing Homes or Adult Residential Facilities (Special Care Homes) will be excluded.
- Serious underlying disease, which, in the opinion of the study physician excludes engagement in interventions or may interfere with the participant's ability to participate fully in the study.
- Has had surgery within the last two months or has planned surgery in the coming 12 months that, deemed by the study physician, could interfere with the participant's vision, hearing, mobility or any other ability to participate in the study.
- Has a history of intracranial surgery.
- Regular Benzodiazepine use by a participant that the study physician determines to be significant enough to interfere with the participants ability to participate in the assessments and interventions in the study will be excluded.
- Presence of major depression, schizophrenia, severe anxiety or drug/alcohol abuse or other medical illness that would prohibit them from safely participating in the study or may cause harm to the participant.
- Current Parkinsonism or any neurological disorder with residual motor deficits (e.g. stroke with motor deficit), active musculoskeletal disorders (e.g. severe

1 osteoarthritis of lower limbs) or history of knee/hip replacement affecting gait  
2 performance during the baseline assessment.

- 3
- 4
- 5 • Severe visual and/or auditory impairment, which, according to the vision and
- 6 hearing assessment, precludes the participant from engaging in the trial.
- 7
- 8 • Intention to enroll in other clinical trials during the same time period.
- 9
- 10 • Active participation in an organized and planned exercise program involving
- 11 aerobic exercise and/or resistance training regimen in previous 6 months.
- 12
- 13

### 14 **5.2.3 Screen Failures**

15 Screen failures are defined as participants who have completed the Screening Visit but  
16 do not meet the inclusion criteria for any of the three populations under study (MCI, SCI,  
17 or CI with risk factors). These participants who have failed the screening criteria are  
18 ineligible for participation and will be informed that they do not meet the study's  
19 inclusion criteria and they will be thanked for their time. They will be encouraged to try  
20 to participate in future studies for which they may be eligible and they will have an  
21 opportunity to ask questions pertaining to their screening for SYNERGIC@Home.  
22

### 23 **5.2.4 Study Care Partner**

24 All participants will be asked about whether they wish to have a study care partner such  
25 as a spouse, close friend, or relative participate along with them in the trial. Specifically,  
26 the care partner's role will be to participate in assessments such as the CDR (as in  
27 Table 1) as it requires a study care partner. Care partners will be specifically told that  
28 their only role is to help us complete the CDR. If the participant does not have a care  
29 partner on the day of their assessment (someone to attend the virtual visit with them),  
30 the informant portion of the assessment (the CDR) can be completed by phone.. This  
31 will be arranged and completed by the site research coordinator.  
32

33 A participant will not be excluded from the study if they do not have access to or wish to  
34 have a study care partner. However, if the individual during screening is deemed to  
35 have MCI or SCI, or the study physician determines that their participation without a  
36 study care partner would be a risk—then the participant will be asked to name a study  
37 care partner for their participation in the trial.  
38

We believe that in certain instances, such as in the case of couples, some study care partners may also want to be a participant, however because participants are meant to be blinded as to which experimental condition they are in—we will ask that care partners remain as care partners and do not occupy the role of participant in the study.

### 5.2.5 Strategies for Recruitment

Community dwelling older adults from both Anglophone and Francophone communities throughout New Brunswick will be recruited using recruitment methods and tools included in Appendix B. These recruitment materials will be available in both official languages. Interested participants will be directed to contact study personnel through the NB-PALM website. A dedicated email address ([synergic@unb.ca](mailto:synergic@unb.ca)) will be established. The following recruitment tools will be used to inform potential study participants living throughout New Brunswick about the study:

- Flyer (Appendix B) for posting on various community organization websites, and healthcare provider websites, social media, and in physical offices.
- Email (Appendix B) for distribution to potential study participants referred by others.
- Paid newspaper advertisements (Appendix B) in selected local newspapers.

These tools will be applied in various ways to reach potential study participants. The offices of primary care physicians/providers and specialists will be provided with a study flyer for posting. They will be invited to refer potential participants from their practices. An information handout (See Appendix B) describing the study will be used to familiarize providers with the study. Interested participants can be directed to contact study personnel through the NB-PALM website and visit the dedicated SYNERGIC@Home study page.

Participants currently enrolled in the COMPASS ND cohort study in Saint John, NB will also be contacted to ask about their interest in participating. A follow-up email (Appendix B) will be sent to these potential participants.

Existing community resources such as the Seniors' Centres, Community Health Centres, and Community Mental Health Centres as well as recreation facilities and

1 libraries will be provided with study information to post on social media (If available) and  
2 news/what's happening section of their websites (if available) and / or distribute to their  
3 membership via email or hard copy or digital newsletters. The Community Developers  
4 working in the Vitalité and Horizon Health Networks have many contacts and  
5 connections with formal and informal community groups and networks. Study flyers and  
6 a generic email will be provided for distribution to these organizations with whom they  
7 are connected. Study information will be provided to two particular provincial programs:  
8 Senior Goodwill Ambassador Program and Go Ahead Seniors/Aînés en Marche, both of  
9 which provide physical activity and lifestyle modification programs to community  
10 dwelling older adults. Similar organizations will also be contacted and invited to  
11 distribute information about the study.  
12  
13  
14  
15  
16  
17  
18  
19  
20

21 Study flyers will be sent to the leadership of provincial English and Francophone  
22 seniors' organizations including the Association francophone des aînées et des aînés  
23 du Nouveau-Brunswick and NB Senior Citizen's Federation as well as community  
24 partners such as the NB Alzheimer's Society for posting on their websites and social  
25 media platforms. Targeted provincial organizations like the NB Society of Retired  
26 Teachers and Société des Enseignantes et des Enseignants Retraités Francophones  
27 du Nouveau-Brunswick (SERFNB) also have websites as well as local branches to  
28 whom the study flyer and generic email will be provided for distribution.  
29  
30  
31  
32  
33  
34  
35

36 Paid newspaper advertisements will be purchased in selected urban and community-  
37 based rural newspapers.  
38  
39  
40

41 When a member of the research team receives an expression of interest email from a  
42 potential study participant through the NB-PALM website or other referral sources as  
43 listed above, a generic email and/or study flyer and consent package will be sent by  
44 email. Once a study participant is ready to give consent, a first contact discussion guide  
45 (Appendix B) will be followed by research personnel to ensure that a consistent  
46 approach is used to obtain participants' consent.  
47  
48  
49  
50  
51

### 52 **5.2.6 Strategies for Retention**

53 Retention of participants will be pursued through various methods. News about the  
54 study will be posted on the NB-PALM website and participants will be encouraged to  
55  
56  
57



1 visit the page dedicated to the SYNERGIC@Home. Research personnel will be  
2 provided with key messages to use in their interactions with study participants to keep  
3 them informed.  
4  
5

6  
7 Participants that do not comply with the intervention schedule may be withdrawn from  
8 the study at the discretion of the research team. Research Assistants will make all  
9 efforts to allow participants to have flexibility with their intervention schedules and  
10 participants will be allowed to make up missed intervention dates within the week that  
11 they occur. Since this is a feasibility study, intervention schedule deviations will be  
12 closely tracked but no rigid rule of number of missed interventions before withdrawal  
13 occurs will be employed. Each case will be individually evaluated and the benefit of the  
14 doubt given in an attempt to observe the compliance behaviour patterns of participants  
15 across the entire 16 week intervention duration.  
16  
17  
18  
19  
20  
21  
22  
23

### 24 5.3 ASSESSMENTS TOOLS

25  
26 **Participants in all four arms will have a series of validated assessments performed at the**  
27 **Screening, Baseline (T0), Immediate post intervention follow-up at 4 months (T4), and 6-**  
28 **month post-intervention follow-up (T10), as shown in \* *Time between clinical and activity***  
29 ***sessions will be kept within 3 days with an allowable range of 1-7 days.***  
30  
31

32 **Figure 2.** All elements of each assessment will be collected via video conferencing  
33 (*Zoom for Healthcare*®). All assessments are itemized in Table 2 (below).  
34  
35

36  
37 All participants will also be given an ActiGraph (ActiGraph GT9X®) device, a measuring  
38 tape, some exercise materials (such as resistance bands or a stretching mat). Please  
39 see the complete list in Appendix B). These items will be delivered and picked up by a  
40 secure mailing and parcel service or secure courier. The ActiGraph device will be worn  
41 on the participant's wrist, hip, or ankle for 10 consecutive days, at three separate time  
42 points (baseline, immediate post intervention follow up and 6 month post intervention  
43 follow up). These devices will be used to measure nightly sleep patterns and daily  
44 activity levels.  
45  
46  
47  
48  
49  
50

51 **Table 2.** Assessments across Study Visits for SYNERGIC@Home Trial  
52  
53  
54  
55  
56  
57

| Assessment                                     | Clinical Screening | Physician Conference | Clinical T0 | Activity T0 | Clinical T4 | Activity T4 | Clinical T10 | Activity T10 |
|------------------------------------------------|--------------------|----------------------|-------------|-------------|-------------|-------------|--------------|--------------|
| <b>Consent</b>                                 |                    |                      |             |             |             |             |              |              |
| Participant Informed Consent                   | •                  |                      |             |             |             |             |              |              |
| Study Partner Informed Consent                 | •                  |                      |             |             |             |             |              |              |
| <b>General Health and Medical History</b>      |                    |                      |             |             |             |             |              |              |
| Demographics                                   | •                  |                      |             |             |             |             |              |              |
| Medical Vitals                                 | •                  |                      | •           |             | •           |             | •            |              |
| Medical History <sup>1</sup>                   | •                  |                      | •           |             | •           |             | •            |              |
| Inclusion and Exclusion Criteria               |                    | •                    |             |             |             |             |              |              |
| Diagnostic Summary / Diagnostic Validation     |                    | •                    |             |             | •           |             | •            |              |
| <b>Cognitive Testing</b>                       |                    |                      |             |             |             |             |              |              |
| Telephone Cognitive Screening TCogS            | •                  |                      |             |             | •           |             | •            |              |
| Full MoCA via Audio-Visual Conference          | •                  |                      |             |             | •           |             | •            |              |
| <i>Cognitive Functional Composite (CFC-2)</i>  |                    |                      |             |             |             |             |              |              |
| ADAS-Cog 3 Immediate Word Recall               | •                  |                      |             |             | •           |             | •            |              |
| ADAS-Cog 3 Delayed Word Recall                 | •                  |                      |             |             | •           |             | •            |              |
| ADAS-Cog 3 Orientation                         | •                  |                      |             |             | •           |             | •            |              |
| Clinical Dementia Rating Scale (CDR) Cognitive | •                  |                      |             |             | •           |             | •            |              |
| Functional Activities Questionnaire            | •                  |                      |             |             | •           |             | •            |              |
| <i>Additional Cognitive Outcomes</i>           |                    |                      |             |             |             |             |              |              |
| Oral Trail Making Test (Part A & B)            |                    |                      | •           |             | •           |             | •            |              |
| Boston Naming Test                             |                    |                      | •           |             | •           |             | •            |              |
| Logical Memory I & II                          | •                  |                      |             |             | •           |             | •            |              |
| ADAS-Cog Word Recognition                      |                    |                      | •           |             | •           |             | •            |              |

| Assessment                                     | Clinical Screening | Physician Conference | Clinical T0 | Activity T0 | Clinical T4 | Activity T4 | Clinical T10 | Activity T10 |
|------------------------------------------------|--------------------|----------------------|-------------|-------------|-------------|-------------|--------------|--------------|
| DKEFS Phonemic Fluency Test                    |                    |                      | •           |             | •           |             | •            |              |
| DKEFS Semantic Fluency Test                    |                    |                      | •           |             | •           |             | •            |              |
| Digit Span Backward Test                       |                    |                      | •           |             | •           |             | •            |              |
| Digit Symbol Modalities Test-Oral Version      |                    |                      | •           |             | •           |             | •            |              |
| <b>Diet Assessments</b>                        |                    |                      |             |             |             |             |              |              |
| Mediterranean Diet Assessment (MDA-14)         | •                  |                      |             |             | •           |             | •            |              |
| Eating Pattern Self-Assessment (EPSA)          |                    |                      | •           |             | •           |             | •            |              |
| Vitamin D Intake Questionnaire                 |                    |                      | •           |             | •           |             | •            |              |
| <b>Sleep Assessments</b>                       |                    |                      |             |             |             |             |              |              |
| Pittsburgh Sleep Quality Index (PSQI-18)       | •                  |                      |             |             | •           |             | •            |              |
| Consensus Sleep Diary (CSD)                    | •                  |                      |             |             | •           |             | •            |              |
| Sleep and Activity Monitoring                  |                    |                      |             | •           |             | •           |              | •            |
| <b>Functional and Activity Level</b>           |                    |                      |             |             |             |             |              |              |
| Physical Activity Scale for the Elderly (PASE) |                    |                      |             | •           |             | •           |              | •            |
| Life Space Questionnaire (LSQ)                 |                    |                      |             | •           |             | •           |              | •            |
| Clinical Frailty Scale (CFS)                   | •                  |                      |             |             | •           |             | •            |              |
| Lawton-Brody IADL                              | •                  |                      |             |             | •           |             | •            |              |
| <b>Mental Health and Well Being</b>            |                    |                      |             |             |             |             |              |              |
| Short Form Quality of Life Questionnaire SF36  | •                  |                      |             |             | •           |             | •            |              |
| Generalized Anxiety Disorder (GAD-7)           | •                  |                      |             |             | •           |             | •            |              |
| Geriatric Depression Scale (GAD-30)            | •                  |                      |             |             | •           |             | •            |              |
| COVID-19 Questionnaires                        | •                  |                      |             |             | •           |             | •            |              |
| <b>Health Literacy</b>                         |                    |                      |             |             |             |             |              |              |

| Assessment                                           | Clinical Screening                        | Physician Conference | Clinical T0 | Activity T0 | Clinical T4 | Activity T4 | Clinical T10 | Activity T10 |
|------------------------------------------------------|-------------------------------------------|----------------------|-------------|-------------|-------------|-------------|--------------|--------------|
| Short Test of Func.Health Literacy in Adults STOFHLA |                                           |                      | •           |             |             |             |              |              |
| <b>Technology Ability Use</b>                        |                                           |                      |             |             |             |             |              |              |
| FACETS                                               |                                           |                      |             | •           |             | •           |              | •            |
| <b>Gait and mobility Assessments<sup>2</sup></b>     |                                           |                      |             |             |             |             |              |              |
| Usual Gait                                           |                                           |                      |             | •           |             | •           |              | •            |
| Seated Dual Task                                     |                                           |                      |             | •           |             | •           |              | •            |
| Dual Task Gait Assessment                            |                                           |                      |             | •           |             | •           |              | •            |
| One Minute Sit to Stand Test (STST)                  |                                           |                      |             | •           |             | •           |              | •            |
| Get Active Questionnaire                             | •                                         |                      |             |             |             |             |              |              |
| Falls Calendar                                       |                                           |                      | •           |             | •           |             | •            |              |
| <b>Intervention Preference</b>                       |                                           |                      |             |             |             |             |              |              |
| Preference Questionnaire                             |                                           |                      |             | •           |             | •           |              | •            |
| <b>Biological Markers<sup>3</sup></b>                |                                           |                      |             |             |             |             |              |              |
| Polygenic Hazard Score (PHS)                         | <i>Any point throughout trial</i>         |                      |             |             |             |             |              |              |
| <b>Study Exit</b>                                    |                                           |                      |             |             |             |             |              |              |
| Exit Questionnaire                                   | <i>At time of finishing/exiting trial</i> |                      |             |             |             |             |              |              |

<sup>1</sup>Full history collected at Clinical Screening and updated thereafter.

<sup>2</sup>Gait velocity assessed using Actigraphy (ActiGraph GT9X).

<sup>3</sup>Self-collected via an optional saliva sample.

## 6. OUTCOMES

### 6.1 PRIMARY FEASIBILITY OUTCOMES

#### 6.1.1 Intervention Adherence

Measured as the mean percent of all Intervention sessions attended of the 48 planned sessions per participant.

### 6.2 SECONDARY FEASIBILITY OUTCOMES

#### 6.2.1 Recruitment Enrollment Rate

Measured as the total percent of enrolled participants relative to number of people screened for eligibility.

#### 6.2.2 Enrollment Retention Rate

Measured as the total percent of enrolled participants who continue throughout the trial and participate in outcomes assessments as follows (see Figure 3):

- Enrollment retention: of those enrolled participants, the % who complete immediate post intervention follow-up (T4) assessment, and;
- Follow-up retention: of those who complete the immediate post intervention follow-up (T4) assessment, the % of participants who complete the 6-month post-intervention follow-up (T10) assessment.

#### 6.2.3 Assessment Tolerability

Measured as the number of voluntary dropouts occurring either during or between baseline assessment (both clinical and activity assessment batteries) and prior to allocation to an intervention group.

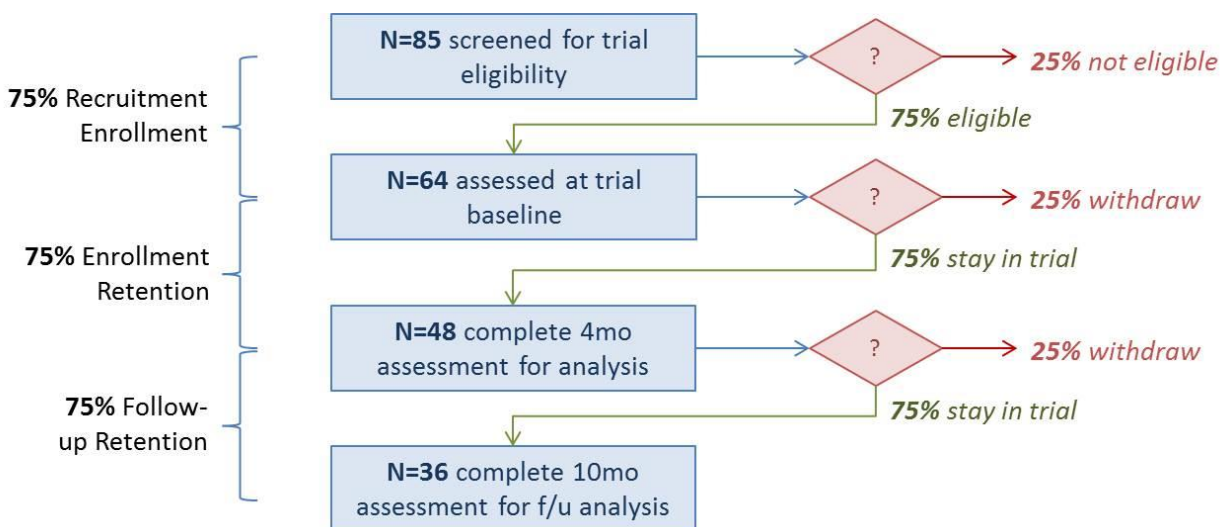

Figure 3. Attrition flowchart for SYNERGIC@Home trial.

### 6.2.4 Trial Experience

A mixed a methods approach will be used to explore participant experience after the trial. Trial experience is defined as participants' qualitative responses to semi-structured open-ended questions aimed at providing insights on their overall trial experience within the context of the Kirkland evaluation framework.

### 6.2.5 Adverse Events

Frequency cross-tabulation of AE severity versus AE relation to trial.

### 6.2.6 Data Loss

Defined as data lost due to technical failures, personnel errors or participant non-compliance. Technical failures resulting in data loss include problems with electronic equipment or internet communications, for example. Personnel errors would include issuing improperly configured equipment, scheduling errors, and protocol deviations (omitting assessments, for example) that result in data loss. Participant non-compliance would encompass data loss due to participants not following instructions or omitting responses on surveys, for example.

## 6.3 PRIMARY ANALYTIC OUTCOMES

### 6.3.1 Intervention Preference

The primary analytic goal of SYNERGIC@Home is to assess the relationship between participants' adherence to the interventions and their affinity for each intervention going into the trial. All participants will be given the Intervention Preference Questionnaire (IPQ, Appendix A) prior to implementation of the intervention at baseline (T0) and after the 4mo intervention (T4).

The IPQ asks participants various questions about their affinity for the offered interventions by quantifying interest level and preferences for the interventions. When administered at T0 (prior to randomization) we will explain to participants that their responses on the questionnaire will not in any way influence the intervention group they will be randomly assigned to.

The IPQ has five questions. Question 1 asks participants to rate their interest level in each intervention type (exercise training and cognitive training independently) on a 0-10 visual analog scale. Question 2 asks participants to rate their preference between the two interventions on a 5-point scale:

-2=Strong preference for Exercise training;

-1=Slight preference for Exercise training;

0=No preference;

1=Slight preference for Cognitive training;

2=Strong preference for Cognitive training.

Questions 3 to 5 are open ended questions that will provide context to participants' responses from questions 1 and 2.

Validation: The intervention preference questionnaire has been created specifically for this feasibility trial, thus it has not been previously validated.

## 6.4 SECONDARY ANALYTIC OUTCOMES

### 6.4.1 Demographic Information and Medical History

Demographic information, chronic diseases, vascular risk factors (VRFs), medical history, medications, fall history using self-reports of falls on a fall calendar will be collected at the screening visit. In addition, medical vitals will be assessed including weight, height, blood pressure and heart rate (using a simple blood pressure cuff that will be provided to the participant).

*Validation:* This information will be collected by self-report and will be done via video conference. While medical history taking have not been systematically evaluated in this setting it is commonly used in remote telemedicine and is considered an acceptable practice and a reasonable alternative to face to face history taking. We are confident that results will be similar to those assessed in person. We are confident that participants will be able to adequately measure their vitals and report the findings to the study personnel.

### 6.4.2 Cognitive Testing

Cognitive outcomes will be measured using the Cognitive Functional Composite 2 (CFC-2), the Telephone Cognitive Screening (TCogS), the Montreal Cognitive Assessment (MoCA), and select items from the Alzheimer's Disease Assessment Scale-Cognitive (ADAS-Cog Plus).

#### TCogS and MoCA.

- **The Telephone Cognitive Screening TCogS** is a widely used tool that measures cognitive function in older individuals. The telephone version of the CogS has been standardized and will be administered via video conferencing. It consists of a 26-point assessment that measures orientation, registration, attention and calculation, recall, and language with lower scores indicating cognitive impairment<sup>55,56</sup>.

*Validation:* The TCogS will be administered using the standardized and validated telephone version<sup>56-58</sup> via video conferencing.



- **The Full MoCA via Audio-Visual Conference** consists of a 30-point test assessing the following items: short term memory recall, visuospatial abilities, executive functioning, phonemic fluency, verbal abstraction, attention, concentration, working memory, language, and orientation<sup>59</sup>.

Validation: The remote version of the MoCA will be administered using the validated online full MoCA (version 8.1) via audio-visual conference<sup>58,60</sup>.

**Clinical Dementia Rating Scale (CDR).** The CDR is a validated 5-point composite scale used in longitudinal Alzheimer's Disease (AD) research to characterize cognitive and global function performance applicable to AD and related dementias.<sup>61</sup> Information is obtained through a semi-structured interview of the patient and a reliable informant or collateral source (e.g. family member). The three cognitive domains include memory, orientation, and judgment/problem solving and the three functional domains include community affairs, home and hobbies and personal care. The five possible scores for each domain [0, 0.5, 1, 2, and 3] represent a range of impairment (e.g. score of 0 represents no impairment and a score of 3 represents severe impairment).

Validation: The CDR is a questionnaire which can be administered via any interface (face-to-face or video conferencing). We will administer it via video conferencing. Clinical experience dictates that this method of delivery of the CDR will be sufficient.

**Cognitive Functional Composite (CFC-2).** The CFC consists of the following tests<sup>5,6</sup>. The first three tests originate from the ADAS-Cog 13, which has been used a primary outcome measure in numerous trials with individuals at risk for developing ADRDs<sup>7,8</sup>.

- a) **ADAS-Cog Immediate Word Recall.** Participants are presented with 10 high imagery words and are given three trials to learn and recall them. The average of the 3 trials is computed for the final score.

Validation: This is a subtest of the ADAS-cog, which has been validated for remote, virtual use<sup>9</sup>.

- b) **ADAS-Cog Delayed Word Recall.** Participants are asked to recall the 10 high imagery words presented during the immediate word recall task after a delay of approximately 5 to 10 minutes.

1            Validation: This is a subtest of the ADAS-cog, which has been validated for  
2 remote, virtual use<sup>9</sup>.

- 3  
4  
5 c) **ADAS-Cog Orientation.** Participants are asked 8 questions pertaining to their  
6 identity, the place, and the time.

7            Validation: This is a subtest of the ADAS-cog, which has been validated for  
8 remote, virtual use<sup>9</sup>.

- 9  
10  
11 d) **Clinical Dementia Rating Sum of Boxes (CDR-SB) Cognitive portion.** The  
12 CDR is being administered in full for this trial. The sum of boxes score simply  
13 reflects the total score from all domains assessed. The CFC-2 includes the CDR-  
14 SB for all cognitive portions, which consists of a sum of scores obtained from the  
15 following CDR domains: memory, orientation, and judgement & problem solving.

16            Validation: The CDR is a questionnaire which can be administered via any  
17 interface (face-to-face or video conferencing). We will administer it via video  
18 conferencing. Clinical experience dictates that this method of delivery will be  
19 sufficient.

- 20 e) **Functional Activities Questionnaire.** This questionnaire will be administered as  
21 part of the functional assessments of this trial. It measures participant's ability to  
22 engage in instrumental activities of daily living via questionnaire assessing  
23 activities such as preparing meals and managing personal finances<sup>3</sup>. Responses  
24 range from 0 (normal ability) to 3 (dependent for functioning) with total scores  
25 ranging from 0 to 30. For the CFC-2 total score, this score will be added to obtain  
26 a total CFC-2 composite score.

27            Validation: This assessment of functional independence is collected via  
28 questionnaire, which can be administered via any interface (face-to-face or video  
29 conferencing). We will administer it via video conferencing.

30  
31  
32 **Additional Cognitive Outcomes.** We will also administer additional cognitive  
33 outcomes including the following:

- 34  
35  
36  
37  
38  
39  
40  
41  
42  
43  
44  
45  
46  
47  
48  
49  
50  
51  
52  
53  
54  
55  
56  
57  
58  
59  
60
- **The Oral Trail Making Test (TMT) A & B** is a two-part test that assesses attention speed, and mental flexibility and has been widely used in clinical settings for assessing deficits in attention and executive functioning.<sup>62</sup> The oral version of the Trail Making Test provides an assessment of sequential set-

1 shifting without the motor and visual demands of the written Trail Making Test.<sup>10</sup>  
2  
3 For Part A, participants are asked to count from 1 to 25 as quickly as possible.  
4  
5 For Part B, participants are asked to switch between number and letter in  
6  
7 sequential order (e.g. 1-A, 2-B, 3-C) until the number 13 is reached. Scoring is  
8  
9 the total time to complete each part.

10 Validation: The oral trail making tests A & B are validated assessments that can  
11  
12 be conducted remotely without the need for the traditional paper and pencil face-  
13  
14 to-face modality.<sup>10</sup> We will administer them both using video conferencing.

- 15 • **The Boston Naming Test (BNT)** assesses visual confrontational naming and  
16  
17 asks participants to name simple line drawings of objects.<sup>11</sup>

18 Validation: To our knowledge, the BNT has not yet been validated for remote,  
19  
20 virtual, or phone use, thus we show participants each item on the screen during  
21  
22 the video conference. It is noteworthy that this mode of administration (in  
23  
24 comparison to face-to-face-assessment) has not been methodically validated.

- 25 • **Logical Memory I & II (Story A)** from the Wechsler memory scale assesses  
26  
27 memory and free recall<sup>63</sup>. This test will be completed via video conferencing in  
28  
29 which the participant will be instructed to listen to a story and repeat it back after  
30  
31 it has been read to the best of his/her **ability**. The participant will then be asked to  
32  
33 recall the story approximately 30 minutes later.

34 Validation: Because this test is an auditory test to begin with (i.e., it does not  
35  
36 require visual stimuli such as paper and pencil questionnaires), it can be  
37  
38 administered using any modality (face-to-face or via video conference). We will  
39  
40 conduct it via video conferencing.

- 41 • **ADAS-Cog Word Recognition.** Participants are presented with a list of 12  
42  
43 words and are then asked to identify the words among a list of distractor words.

44 Validation: This is a subtest of the ADAS-cog, which has been validated for  
45  
46 remote, virtual use<sup>9</sup>.

- 47 • **DKEFS Phonemic (Letter) Fluency.** The Delis-Kaplan Executive Function  
48  
49 System (DKEFS) phonemic fluency test measures phonemic verbal fluency,  
50  
51 whereby participants are given 60 seconds to produce as many words that begin  
52  
53 with the letter C, followed by a second 60 second trial with the letter “F”, and a  
54  
55 third 60 second trial with the letter “L”<sup>13</sup>.

1            Validation: This test has been validated for telephone use, as results are  
2            statistically similar to those done face-to-face<sup>64</sup>. We will administer it via video  
3            conferencing.  
4

- 5
- 6            • **DKEFS Semantic Fluency Test.** The Delis-Kaplan Executive Function System  
7            (DKEFS) semantic fluency test measures speed and flexibility of verbal thought,  
8            whereby participants are asked to name as many items as possible in a specified  
9            category (vegetables and animals). Unique responses during the first minute of  
10            each category are counted<sup>13</sup>.

11            Validation: This test has been validated for telephone use<sup>14</sup>. We will administer it  
12            via video conferencing.  
13

- 14            • **Digit Span Backward Test.** The digit span test is an auditory attention task, in  
15            which participants are asked to recall a series of numbers forward and backward.  
16

17            Validation: This test has been validated for telephone use<sup>14</sup>.  
18

- 19            • **Digit Symbol Modalities Test-Oral Version.** This is a timed task that gives  
20            participants 120 seconds to orally match geometric figures with specific numbers  
21            according to a defined key (specifying which symbols are assigned to which  
22            numbers) that is provided at the top of the stimulus page<sup>15,65</sup>.

23            Validation: The oral version of this test has been validated<sup>15</sup>. We will administer it  
24            via video conferencing.  
25

### 26            6.4.3 Sleep Patterns

27            Sleep habits will be assessed using the 18-item Pittsburgh Sleep Quality Index (PSQI-  
28            18)<sup>66</sup> and the unpublished Work and Sleep Diary (WSD).  
29

30            Validation: Both sleep assessments are done via validated questionnaires which can be  
31            administered via any interface (face-to-face or video conferencing). We will administer  
32            them via video conferencing.  
33

### 34            6.4.4 Diet Patterns

35            Diet habits, food consumption, and nutrition intake will be assessed using the 14-item  
36            Mediterranean Diet Assessment (MDA-14)<sup>67</sup>, the Eating Pattern Self-Assessment  
37            (developed by the CCNA team), and a short questionnaire for Vitamin D intake.<sup>68</sup>  
38  
39  
40  
41

1 Validation: All diet assessments are done via questionnaires which can be administered  
2 via any interface (face-to-face or video conferencing). We will administer them via video  
3 conferencing.  
4  
5

#### 6 **6.4.5 Functional Independence and Activity Level**

7 Additional descriptors of functional health and independence will also be tested  
8 including: the activities of daily living—using the Lawton-Brody Instrumental Activities of  
9 Daily Living (IADL) scale<sup>3</sup>, the physical activity scale for the elderly (PASE)<sup>69</sup>, and the  
10 Life Space Questionnaire (LSQ)<sup>70</sup>.  
11  
12  
13  
14  
15

16 Validation: All of the above assessments of functional independence and activity level  
17 are collected via questionnaires which can be administered via any interface (face-to-  
18 face or video conferencing). We will administer them via video conferencing.  
19  
20  
21  
22  
23

24 **Clinical Frailty Scale (CFS).** We will also obtain a measure of clinical frailty using the  
25 Clinical Frailty Scale. This will allow for a determination of the clinical frailty of the  
26 participants. This assessment will be performed by the Clinical Research  
27 Coordinator/nurse using the 9-point CFS instrument. Excluding the last two categories  
28 which are not applicable to our sample (bedridden), it is effectively the validated 7-point  
29 CFS<sup>71</sup>.  
30  
31  
32  
33  
34  
35

36 Validation: The use of the CFS by remote video conferencing has not been evaluated  
37 but it is thought that this will be a reasonable way to gather information needed to  
38 determine the CFS score. The information needed is obtained by history and self-report  
39 from the participant.  
40  
41  
42  
43

44 **Lawton-Brody Instrumental Activities of Daily Living (IADL) scale.** The IADL will be  
45 administered as part of the functional assessments of this trial and serve as an inclusion  
46 criterion of preservation of function (score > 14/23). It measures participant's ability to  
47 engage in instrumental activities of daily living via questionnaire assessing activities  
48 such as preparing meals and managing personal finances<sup>3</sup>. Total scores range from 0  
49 to 23, with 23 being totally independent.  
50  
51  
52  
53  
54  
55

1 Validation: This assessment of functional independence is collected via questionnaire,  
2 which can be administered via any interface (face-to-face or video conferencing). We  
3 will administer it via video conferencing.  
4  
5  
6  
7  
8  
9

#### 10 **6.4.6 Psychiatric Health and Well-Being**

11 Psychiatric health and well-being will be assessed using the Short Form quality of life  
12 questionnaire (SF-36)<sup>72</sup>, the Generalized Anxiety Disorder 7 (GAD-7)<sup>73</sup>, Geriatric  
13 Depression Scale (GDS-30)<sup>74</sup>, and the COVID-19 Questionnaires—that aim to delineate  
14 the impacts of the COVID-19 pandemic of 2020<sup>75</sup>. An additional New Brunswick (NB)  
15 COVID 19 questionnaire will also be administered. This tool has been adapted from a  
16 telephone survey conducted by Ability NB used to evaluate the effect of COVID 19 on  
17 participants living in the community who have physical disability.  
18  
19  
20  
21  
22  
23  
24

25 Validation: The psychiatric health and well-being assessments (SF-36, GAD-7, and  
26 GDS-30), are well-established questionnaires, which can be administered via any  
27 interface (face-to-face or video conferencing); we will administer them via video  
28 conferencing. The COVID-19 questionnaires have been specifically developed during  
29 the pandemic of 2020. They have not yet been validated. We will administer them via  
30 video conferencing.  
31  
32  
33  
34  
35  
36

#### 37 **6.4.7 Health Literacy**

38 Health Literacy will be assessed using the abbreviated version of the Test of Functional  
39 Health Literacy in Adults (TOFHLA)<sup>108</sup>. The short version, STOFHLA, consists of 2 prose  
40 passages and 4 numeracy items.  
41  
42  
43  
44

45 Validation: A preliminary study demonstrated that the results of the S-TOFHLA  
46 administered through a computer were equivalent to those when administered on  
47 paper.<sup>109</sup> We will administer the S-TOFHLA in a digital format, over video conferencing.  
48  
49  
50

#### 51 **6.4.8 Technology Ability and Use**

52 To assess the extent to which participants are comfortable with and familiar with basic  
53 technology, we will administer the Functional Assessment of Currently Employed  
54  
55  
56  
57

1 Technology Scale (FACETS)<sup>76</sup>. The FACETS is a 10-item questionnaire with possible  
2 responses falling on a Likert-type scale, and higher scores indicating more frequent use  
3 of technology domains<sup>76,78</sup>. While the FACETS will not be used as part of the eligibility  
4 criteria, we feel that it will be a worthwhile endeavor to delineate the potential change in  
5 technology use over the course of the home-based remote trial.  
6  
7  
8  
9

10  
11 Validation: The FACETS is typically administered via questionnaires which can be  
12 administered via any interface (face-to-face or video conferencing). We will administer it  
13 via video conferencing.  
14  
15

#### 16 17 **6.4.9 Gait and Mobility Assessments**

18  
19 The Get Active Questionnaire (GAQ)<sup>53</sup> will be used at screening to ensure to it is safe  
20 for participants to exercise, and will be reviewed by the intervention RA (after allocation)  
21 when tailoring the participant's intervention to their level of function.  
22  
23  
24

25 Gait performance will be recorded using actigraphy, which can be used to determine  
26 spatiotemporal gait parameters and can be simply placed on the participant's hip.  
27 Specifically, gait parameters will be measured using the ActiGraph GT9X (the same  
28 device they use for sleep and activity monitoring), during which participants engage in a  
29 series of gait tasks via video conferencing with a study Kinesiology Research Assistant.  
30 If video conferencing poses any issues on participant's the ability to position the screen  
31 to allow the researcher to visualize the trial—then phone communication will commence  
32 instead. In all walks, participants will start 1 meter before the beginning of the 6-meter  
33 allocated space and continue to travel 1 meter past the end of the space. If a 6-meter  
34 space is not available, then participants will be asked to use a 3 meter corridor within  
35 their home and for analyses, we will extrapolate based on this subset data. The  
36 procedure of allowing extra space prior to and after the walking distance is in place to  
37 ensure steady state walking and to minimize any effects of acceleration and de-  
38 acceleration during the course of the walk<sup>79</sup>. The reason for a 3 meter minimum  
39 distance is because this distance has been shown to sufficiently measure gait speed in  
40 older adults<sup>80</sup>. To avoid tripping or falls, participants will be instructed to walk on a  
41 smooth surface with no barriers.  
42  
43  
44  
45  
46  
47  
48  
49  
50  
51  
52  
53  
54  
55  
56  
57

1        Validation: Reliability has been previously established for this protocol in people at risk  
2  
3        for developing ADRDs and those with MCI<sup>81</sup> and an instructive video can be found at  
4  
5        the “www.gaitandbrain.com/resources” as the Guidelines for Gait Assessments in  
6  
7        CCNA”. However, the virtual administration of this procedure has not yet been  
8  
9        validated, thus the SYNERGIC@Home study will be the first to test its feasibility and its  
10       use at home.

11  
12       The dual-task conditions selected are based on previous research which demonstrated  
13       that counting backwards requires both working memory and attention<sup>82</sup> and naming  
14       animals is related to verbal fluency, which relies on semantic memory<sup>83</sup>. The evaluator  
15       will record any counting errors during walking so that it can be compared with the same  
16       mental tasks while seated. The seated assessments will be timed at 10 seconds and  
17       will be performed in the beginning of all cognitive assessments (at least one hour prior  
18       to the dual task gait condition) to prevent practice effects in dual-task gait performance.  
19       Seated gait assessments will be assessed via video conferencing, whereby participants  
20       are asked to complete the cognitive portion of the dual task gait test while seated. Gait  
21       assessments will be then follow and will also be conducted using video conferencing,  
22       whereby participants are asked to walk towards the camera while engaging in the  
23       cognitive tasks listed above. For details pertaining to the dual task protocol, please see  
24       our detailed manual of procedures.

- 25       • **Seated Dual Task.** Participants will be first asked to complete the cognitive tasks  
26       involved in the dual-task conditions, while seated. Specifically, participants will be  
27       asked to name as many animals as they are able to, count backwards by 1’s,  
28       and count backwards by 7’s while seated. This will be used as a comparison to  
29       determine the extent to which the dual-task reduces performance (their dual-task  
30       cost).
- 31       • **Single-Task Gait Assessment.** Gait velocity will be assessed as the time taken  
32       to walk a specified distance (minimum 3 meters) using actigraphy (ActiGraph®  
33       GT9X Systems, Inc.). This method has been used in previous studies with older  
34       adults to measure gait parameters<sup>84</sup>. Participants will be instructed to measure a  
35       space (minimum 5 meters) in their home and to connect with the research team  
36       via video conferencing during the gait assessments. Their gait velocity will be



1 measured 3 times. Gait variability of spatial and temporal gait variables (stride  
2 time, stride length, double support time and step width) will be measured and the  
3 coefficient of variation calculated ( $CV = (\text{standard deviation} / \text{mean}) \times 100$ ). The  
4 CV is a standardized measure of variability allowing comparison of gait variables  
5 measured in different units, having different means and range of values.  
6  
7

- 8  
9  
10 • **Dual-Task Gait Assessment.** Following single-task gait, participants will perform  
11 three walks, once each under the following dual-task conditions: walking while  
12 naming animals, counting backwards from 100 by 1's, and counting backwards  
13 from 100 by 7's. Gait walks will occur within participant's homes, ideally in a large  
14 corridor or living space—but even in small spaces of at least 3 meters are  
15 suitable. Dual-tasking assessments will permit calculation of dual-task cost for all  
16 gait variables of interest.<sup>85,86</sup>  
17  
18  
19  
20  
21  
22

23 Additional measures of gait and mobility that we will assess include falls (via a falls  
24 calendar) and mobility (via the one-minute sit-to-stand test). Both are described in detail  
25 below.  
26  
27

- 28  
29  
30 • **Falls.** A fall is defined as 'unintentionally coming to rest on the ground, floor, or  
31 other lower level and not due to a seizure, syncope, or an acute stroke'<sup>87</sup>. Events  
32 caused by overwhelming environmental hazards (e.g., being struck by a moving  
33 object) are not considered a fall. Recurrent falls are defined as 'two or more  
34 events in a 12-month period'. Falls will be recorded throughout the trial, in which  
35 participants will be provided with a falls calendars, on which they will record any  
36 falls that have occurred, and the research team will collect them monthly. Study  
37 staff will make a final decision of whether a fall event occurred based on the  
38 provided information about the fall, and may include follow-up discussion with  
39 participant and study partner if applicable. Falls will only be monitored during the  
40 active 4mo intervention period.  
41  
42  
43  
44  
45  
46  
47

48 Validation: the falls calendar is intended for participants to use on their own, thus  
49 its administration does not differ as a function of face-to-face or remote  
50 assessments.  
51  
52  
53  
54  
55  
56  
57

- **Mobility.** To further evaluate mobility, participants will be performing the one-minute sit to stand test (STST) while being assessed via video conferencing by a research team member<sup>88</sup>.

Validation: While the one-minute STST has been validated for use in face-to-face settings<sup>89</sup>, there are no validations to our knowledge of its use in remote settings.

#### 6.4.10 Biological Markers: Polygenic Hazard Score (PHS)

PHS will be collected via saliva samples that participants will self-collect at any point in time throughout the trial. That is, participants will be mailed an unopened saliva sample collection kit from DNA Genotek© (a Canadian bio sample collection company).

Participants will be monitored and assisted during the sample collection process by a research team member. There are specific instructions that must be adhered during saliva collection (such as the requirement that the sample is collected in the morning prior to consuming any food or brushing one's teeth). These instructions will be shared with participants and they will be coached via video conferencing on how to collect, store, and ship their sample. Participants will be notified that providing a saliva sample is optional and they may refuse to do so and still continue their participation throughout the trial. Once collected, participants will be instructed to mail the unidentified sample in a mailing kit with a UNB return address to the lab in which analyses will take place. Samples will be sent to the Clinical Genomics Centre in the Mount Sinai Hospital, 600 University Ave, Toronto, ON M5G 1X5, Canada and will be processed under the guidance of Dr. Kathy Siminovitch.

The saliva sample will measure the following:

- **Biomarkers of ADRDs:** Polygenic Hazard Score (PHS). PHS is derived from a panel of 31 single nucleotide polymorphisms (SNPs) and has been shown to robustly predict the 10 year odds ratio of ADRDs<sup>50</sup>.

The genetic content known as DNA, or deoxyribonucleic acid, will be analyzed in order to learn about genetic information that may increase a person's risk for developing dementia. This test is part of the overall outcome measure and is not a diagnostic test.

1 Study participants will not receive results of this test. This test is not currently a standard  
2 of normal clinical care and is still under research to determine its utility in clinical  
3 practice.  
4  
5  
6  
7

## 8 **7. STUDY INTERVENTIONS**

### 9 **7.1 INTERVENTION DESCRIPTION**

10 All participants will participate in home-based intervention sessions of 90 minutes per  
11 session three times per week for 16 weeks (48 sessions), while in communication with  
12 the research team via *Zoom for Healthcare*®. This period of time for combined  
13 interventions of exercise and cognitive training has been conducted in previous studies  
14 in a clinical environment with significant and promising results<sup>90,91</sup>, but has yet to be  
15 tested with a home-based delivery approach. Each session will last approximately 90  
16 minutes and will consist of 20-25 minutes cognitive training (NEUROPEAK®) or the  
17 cognitive training control followed by approximately 60 minutes of combined exercise  
18 intervention (AE and RT) or BAT control exercise.  
19  
20  
21  
22  
23  
24  
25  
26  
27  
28  
29

30 **Cognitive interventions: Active (NEUROPEAK™) or Control (Website**  
31 **searching/video watching (WS+V))** will be set up remotely by the research team for  
32 the participant, allowing the participant to complete the cognitive training on her/his own.  
33 There will be a research assistant available online to assist with technical questions  
34 during this testing.  
35  
36  
37  
38  
39

40 **Exercise interventions: Active (Aerobic Exercise + Resistance Training (AE+RT))**  
41 **or Control (Balance and Toning (BAT))** will be conducted under the direct supervision  
42 and coaching of a certified exercise physiologist with certification from the Canadian  
43 Society for Exercise Physiology (CSEP; or equivalent certification). These certified  
44 trainers will administer the exercise interventions in a one trainer to one participant ratio.  
45 All arms will have an equal volume and frequency of contact over the entire duration of  
46 the study. To avoid potential imbalances in exposure time, control conditions for  
47 exercise and cognitive training will have the same duration as the active interventions.  
48  
49  
50  
51  
52  
53  
54  
55  
56  
57  
58  
59  
60

## 7.2 INTERVENTIONS

### 7.2.1 Active Exercise Intervention: Aerobic Exercise + Resistance Training (AE+RT)

The combined aerobic exercise and resistance training intervention (AE+RT) will be home-based and held three times per week between Monday and Saturday, ensuring that it is not on three consecutive days. Whenever possible, the research coordinator will ensure that the days of the week in which interventions occur are consistent within participants (i.e., a given participant may have a training schedule of Mondays, Wednesdays, and Fridays every week, or alternatively Tuesdays, Thursdays and Saturdays). Staff trained and certified in exercise training will supervise all sessions on a one-to-one trainer to participant ratio remotely. Trainers will connect virtually using video conferencing with participants and will coach them throughout the entire session for all sessions.

Difficulty of aerobic and resistance exercise will be tailored to their individual functioning level, with constant monitoring by the trainers. For this reason the intervention RA will be required to review the participant's Get Active Questionnaire completed at the screening assessment.

The exercise program described here has been developed by a trained and certified Kinesiologist. As such, it adheres to all safety guidelines and precautions necessary in developing such programs. 3 (below) presents a general overview of the active exercise intervention (AE+RT) regimen structure with the approximate time taken to complete each portion.

**Table 3.** General overview of active intervention exercise regimen structure.

| Section | Type of Exercise                                   | Duration (min) |
|---------|----------------------------------------------------|----------------|
| Warm Up | Marching in one place with arm swings for 1 minute | 1              |
|         | Dynamic Hamstring Stretching: 15 per side          | 1              |
|         | Shoulder Circles: 15 per direction                 | 1              |
|         | 15 Arm Reaches                                     | 0.5            |
|         | Torso Twists: 15 per direction                     | 1              |
|         | Ankle Circles: 15 per direction per side           | 2              |
|         | Side Stepping for 1 minute                         | 1              |

| Section                       | Type of Exercise                   | Duration (min)    |
|-------------------------------|------------------------------------|-------------------|
|                               | 15 Quarter Squats                  | 1                 |
|                               | Total Warm Up Duration             | 8                 |
| Break                         |                                    | 1                 |
| 7 Strength Training Exercises | Chest                              | 5                 |
|                               | Upper Back                         | 5                 |
|                               | Bicep Curls                        | 2.5               |
|                               | Abdominals                         | 2.5               |
|                               | Mid/Lower Back                     | 5                 |
|                               | Quadriceps                         | 5                 |
|                               | Hamstrings                         | 5                 |
|                               | Total Strength Training Duration   | 30                |
| Break                         |                                    | 3                 |
| Aerobic Exercise              | Alternating Video for Participants | 15                |
|                               | Total Aerobic Exercise Duration    | 15                |
| Break                         |                                    | 3                 |
| Cool Down                     | Quadriceps Stretch                 | 0.5               |
|                               | Hamstring Stretch                  | 0.5               |
|                               | Calf Stretch                       | 0.5               |
|                               | 2 Hip Stretches                    | 0.5               |
|                               | Static Torso Rotation              | 0.5               |
|                               | Seated Side Bend                   | 0.5               |
|                               | Back and Shoulder Stretch          | 0.5               |
|                               | Chest Stretch                      | 0.5               |
|                               | Triceps Stretch                    | 0.5               |
|                               | Neck Stretch                       | 0.5               |
|                               | Total Cool Down Duration           | 5                 |
| <b>Total Time</b>             |                                    | <b>Approx. 65</b> |

**Warm Up.** The first 5-10 minutes of the intervention exercise session will consist of a general warm-up using dynamic stretches, which include marching in place, various stretching warm up exercises, and quarter squats.

**Strength training.** Following the general warm-up, participants will execute the strength-training portion by performing progressive strengthening exercises (including pushes and pulls using resistance bands, and chair stands). Participants will complete 7

exercises which target major muscles, including quadriceps, hamstrings, chest, back, abdominals, and synergists such as biceps and triceps. Exercise dose characteristics will be structured to elicit the greatest muscular fitness benefits with a general starting regimen consisting of 1-2 sets of high repetition, low resistance training for the first 1 to 5 weeks of the intervention. Following this, weeks 6 to 10 will consist of 2 sets of moderate repetition, moderate resistance training. And finally, weeks 11 to 16 will consist of 1-2 sets of low repetition, high resistance training. For a visual depiction of the strength training progression across the 16 weeks, please see Table 4 (below).

**Table 4.** Example progression of strength training guideline across intervention.

| Weeks    | Sets | Repetitions | Resistance Bands                                         |
|----------|------|-------------|----------------------------------------------------------|
| 1 to 5   | 1    | 15 to 20    | <i>Band Intensity will increase throughout the trial</i> |
| 6 to 10  | 2    | 10 to 15    |                                                          |
| 11 to 16 | 3    | 8 to 12     |                                                          |

Table 4 presents a general guideline demonstrating the overall progression goals of the intervention. However, realistically there are significant individual differences in starting ability and mobility levels. Therefore, while the exercise physiologist will aim to follow the progression guideline of Table 4—individualized and tailored progressive training regimens may be necessary. Therefore, the certified exercise physiologist who developed the exercise program for SYNERGIC@Home has also recommended a series of progressions across the intervention that are tailored to suit individuals at varying levels of ability. These ability levels will be assessed by the site exercise physiologist at the outset of the study. Three main progressions will be offered for each muscle group to increase challenge throughout the training period for individuals of each starting mobility and exercise ability level. All participants will be instructed to rest 30-60 seconds between sets. Training prescription for all exercises was made in accordance to the ACSM guidelines for strength development in older adults (ACSM, 1998). For details pertaining to the tailored training prescription by baseline ability, please see Table 5 (below).

**Table 5. Tailored resistance training prescription by mobility and exercise ability.**

| Low Fitness/Mobility Ability     |                                                                                    |                                                                             |                                                        |
|----------------------------------|------------------------------------------------------------------------------------|-----------------------------------------------------------------------------|--------------------------------------------------------|
| Muscle Group                     | Starting Exercise                                                                  | Moderate Progression                                                        | High Progression                                       |
| Quadriceps                       | Seated leg press with resistance band                                              | Add resistance                                                              | Progress to sit-to-stand                               |
| Chest                            | Seated chest press (light band)/chest fly (light band)                             | Add Resistance                                                              | Lengthen rep time (count 3 down, 3 up)                 |
| Hamstrings                       | Standing hamstring curl/hip raise                                                  | Lengthen rep time (count 3 down, 3 up) + (hip raise)                        | Add resistance                                         |
| Upper Back                       | Scapular squeeze/scapular wall hold                                                | Seated resistance tube row/seated reverse fly (light band)                  | Add resistance                                         |
| Mid/Low Back                     | Reverse Snow angels                                                                | Include legs simultaneously                                                 | Progress to pullover                                   |
| Abdominals                       | Bird Dog variation (arms/legs separate)/dead bug variation                         | Progress to include simultaneous movements of limbs                         | Longer hold                                            |
| Average Fitness/Mobility Ability |                                                                                    |                                                                             |                                                        |
| Muscle Group                     | Starting Exercise                                                                  | Moderate Progression                                                        | High Progression                                       |
| Quadriceps                       | Squat/wall squat (knee pain)                                                       | Add resistance (either with normal bands or thigh bands to activate glutes) | Lengthen rep time (count 3 down, 3 up)/pulse           |
| Chest                            | Counter Push-Up (incline approximately 45)/chest fly (mod band)                    | Reduce incline (shorter surface)                                            | Lengthen rep time (count 3 down, 3 up)                 |
| Hamstrings                       | Resistance Tube Hamstring Curl/single-leg hip raise                                | Add resistance/Lengthen rep time (count 3 down, 3 up)                       | Change surface of planted foot (e.g. foam, bosu, etc.) |
| Upper Back                       | Standing Resistance Tube Row/Reverse Fly (mod band)                                | Add resistance                                                              | Lengthen rep time (count 3 out, 3 in)                  |
| Mid/Low Back                     | Resistance Tube Lat Pullover                                                       | Add resistance                                                              | Lengthen rep time (count 3 out, 3 in)                  |
| Abdominals                       | Incline Plank/bird dog progressions (simultaneous legs/arms)/dead bug progressions | Reduce incline towards horizontal)/banded bird dog/deadbug                  | Longer hold                                            |
| High Fitness/Mobility Ability    |                                                                                    |                                                                             |                                                        |
| Muscle Group                     | Starting Exercise                                                                  | Moderate Progression                                                        | High Progression                                       |
| Quadriceps                       | Split Squat/lunges/walking lunges                                                  | Add resistance/change footing                                               | Lengthen rep time (count 3 down, 3 up)/pulse           |

|              |                                                                                            |                                                       |                                                                 |
|--------------|--------------------------------------------------------------------------------------------|-------------------------------------------------------|-----------------------------------------------------------------|
| Chest        | Floor Push-Ups (from knees or feet)/chest fly (hard band)                                  | Lengthen rep time (count 3 down, 3 up)                | Add resistance band/change hand positioning                     |
| Hamstrings   | Romanian deadlift                                                                          | Lengthen rep time (count 3 down, 3 up)/add resistance | Single Leg Romanian deadlift                                    |
| Upper Back   | Standing single arm resistance tube row/single arm reverse fly (at reasonable resistance)  | Add resistance                                        | Lengthen rep time (count 3 out, 3 in)                           |
| Mid/Low Back | Resistance Tube Lat Pulldown (high anchor, seated, kneeling, standing depending on set-up) | Add resistance                                        | Lengthen rep time (count 3 out, 3 in), change arm position/grip |
| Abdominals   | Forearm Plank/Hollow Hold                                                                  | Hand plank/lower legs                                 | Dynamic plank                                                   |

**Aerobic Exercise.** The aerobic training portion will consist of 10-20 minutes of moderate intensity activity. Participants will be given one of two instructional, at home, exercise videos specifically designed for aerobic and cardiac fitness for older adults to complete via YouTube. Each video is approximately 15 minutes in length and participants will be encouraged to pause or slow down as needed; thus we expect the aerobic training to take approximately 20 minutes to complete. All participants will be monitored via video conferencing by a certified exercise physiologist while partaking in the YouTube home-based exercise. Participants will alternate between the following two videos in order to reduce boredom and maintain their interest.

Video 1: <https://www.youtube.com/watch?v=aVilzXtqi8c&t=167s>

Video 2: [https://www.youtube.com/watch?v=afvTMIT\\_ZTc](https://www.youtube.com/watch?v=afvTMIT_ZTc)

French adaptations for Francophone participants are as follows:

French Video 1: [https://youtu.be/nk0LcCl\\_UJQ](https://youtu.be/nk0LcCl_UJQ)

French Video 2: <https://youtu.be/5MI5QWHc7II>



Intensity will be set using the talk-test, whereby participants state in short sentences and Ratings of Perceived Exertion (RPE; 4-6 on Borg’s 10-point scale). This intensity score will allow us to individually tailor and modify exercises based on the participant’s rating.

**Cool Down.** Each session will end with a five-minute cool down, which will consist of the following stretches (each held for 20-30 seconds); quadriceps stretch, hamstring stretch, calf stretch, 2 hip stretches, static torso rotation, seated side bend, back and shoulder stretch, chest stretch, triceps stretch, and neck stretch.

### 7.2.2 Control Exercise Intervention: Balance and Toning (BAT)

Participants assigned to the BAT control exercise condition will take part in home-based balance and toning exercises, while supervised by a trainer through the video conferencing platform as outlined for the intervention exercise group.<sup>92-97</sup> The format of the control exercises including the duration of activities and the amount of coaching devoted will mirror that of the intervention condition. However, in the control condition, exercises will be devoted to improving muscle tone and flexibility, without improving strength, and cardiorespiratory capacity. Resistant load and number of repetitions will not progress across exercise sessions, unless participants were unable to complete required repetitions at the beginning of the intervention. All BAT sessions will include a simple stretching mat (rather than progressive resistance bands) that will be sent to participants at the study outset. For a general overview of the BAT program, please see Table 6 (below).

**Table 6.** General overview of control BAT regimen structure.

| Section | Type of Exercise                                   | Duration (min) |
|---------|----------------------------------------------------|----------------|
| Warm Up | Marching in one place with arm swings for 1 minute | 1              |
|         | Dynamic Hamstring Stretching: 15 per side          | 1              |
|         | Shoulder Circles: 15 per direction                 | 1              |
|         | 15 Arm Reaches                                     | 0.5            |
|         | Torso Twists: 15 per direction                     | 1              |
|         | Ankle Circles: 15 per direction per side           | 2              |
|         | Side Stepping for 1 minute                         | 1              |
|         | 15 Quarter Squats                                  | 1              |

| Section                         | Type of Exercise                                        | Duration (min)    |
|---------------------------------|---------------------------------------------------------|-------------------|
|                                 | Total Warm Up Duration                                  | 8                 |
| Break                           |                                                         | 1                 |
| 7 Balance and Toning Activities | Standing with Feet Together + Tandem + Single Leg Stand | 10                |
|                                 | Core Contractions + Core & Arm Raises                   | 8                 |
|                                 | Shoulder Retractions                                    | 3                 |
|                                 | Isometric Quadriceps Strength                           | 3                 |
|                                 | Seated Hamstring Curls                                  | 3                 |
|                                 | Seated Arm Shake                                        | 3                 |
|                                 | Total Balance and Toning Duration                       | 30                |
| Break                           |                                                         | 3                 |
| Stretching Exercise             | Alternating Video for Participants                      | 15                |
|                                 | Total Stretching Duration                               | 15                |
| Break                           |                                                         | 3                 |
| Cool Down                       | Quadriceps Stretch                                      | 0.5               |
|                                 | Hamstring Stretch                                       | 0.5               |
|                                 | Calf Stretch                                            | 0.5               |
|                                 | 2 Hip Stretches                                         | 0.5               |
|                                 | Static Torso Rotation                                   | 0.5               |
|                                 | Seated Side Bend                                        | 0.5               |
|                                 | Back and Shoulder Stretch                               | 0.5               |
|                                 | Chest Stretch                                           | 0.5               |
|                                 | Triceps Stretch                                         | 0.5               |
|                                 | Neck Stretch                                            | 0.5               |
|                                 | Total Cool Down Duration                                | 5                 |
| <b>Total Time</b>               |                                                         | <b>Approx. 65</b> |

**Warm Up.** The session will start with the same 5-10-minute warm-up completed in the combined AE and RT group.

**Balance and Toning.** This will be followed by a variety of balance and toning exercises that will target the entire body. These activities are designed to match the intervention condition with respect to the time and duration—but they are not intended to physically challenge participants or progress in any way across the trial.

**Stretching.** Like the intervention condition, participants will alternate between two Youtube videos—but rather than an aerobic portion, the video will consist of a stretching

1 session geared toward older adults. The following are the two videos that participants in  
2 the control condition will be presented with in alternating order.  
3  
4

5  
6 *Video 1:* <https://www.youtube.com/watch?v=eHXbj2Uq8mM>  
7

8  
9 *Video 2:* <https://www.youtube.com/watch?v=zVCqkiqsz4I>  
10

11 **Cool Down.** All participants in the BAT condition will end with cool down stretching that  
12 is identical to the active intervention condition.  
13  
14

### 15 16 **7.2.3 Cognitive Training: NEUROPEAK™**

17 The cognitive training intervention will take place remotely using a tablet or computer-  
18 based multimodal and multi-domain dual-task training with memory load. Participants  
19 will be instructed on how to access the program from their home computer and will be  
20 asked to complete the cognitive training program called NEUROPEAK™ on their home  
21 computer prior to each exercise training session. Specifically, participants will be  
22 assisted by research staff in connecting to the platform from their home computer/tablet.  
23 The research assistant will connect with the participant via *Zoom for Healthcare*© in  
24 order to assist with the technical questions and offer technical assistance.  
25  
26

27 NEUROPEAK™ has several cognitive training modules but for this study the custom-  
28 written program consists of a dual-task training program developed at University of  
29 Western Ontario for neurorehabilitation, which has been used in previous Canadian  
30 studies<sup>98-100</sup>. The cognitive training includes dual-task training that requires participants  
31 to maintain and prepare for many response alternatives (working memory) and to share  
32 attention between two concurrent tasks (divided attention). Difficulty of cognitive training  
33 is tailored to their individual functioning level. The training uses a custom-written  
34 program developed for neuro-rehabilitation and has been used in previous research  
35 trials for cognitive<sup>82,83</sup> and mobility outcomes<sup>39</sup>. Cognitive training will take 30 minutes at  
36 maximum to complete, and each participant will perform the cognitive training in their  
37 own home with no assistance for the cognitive training tasks, but will have the  
38 opportunity to ask for help on setting up the program or technical questions. The  
39 participant will be asked to do this training in a quiet room within their home to reduce  
40 any potential distractions.  
41  
42  
43  
44  
45  
46  
47  
48  
49  
50  
51  
52  
53  
54  
55  
56  
57

1 During each cognitive training session, participants will perform one of two different  
2 visuo-motor tasks, which include sets of visual stimuli (e.g., letters, numbers, animals,  
3 vehicles, fruits, celestial bodies) and respective hand-button correspondences (i.e., keys  
4 that are to be tapped on either the right or the left side of the screen). Participants are  
5 instructed to perform these tasks as fast as possible, while maintaining accuracy. Tasks  
6 will be performed both separately and concurrently so that task-set cost and dual-task  
7 cost can be isolated, allowing us to determine the rate at which accuracy decreases  
8 when task demands are high. At each session, task combination for the sets of stimuli  
9 will change (from a total 18 combinations). Training will also include online feedback as  
10 well as a histogram of daily performance (a simple graph showing progression but  
11 without specific numbers) to encourage improvement.

#### 21 **7.2.4 Control Cognitive Training: Web Search and Video (WS+V)**

22 The cognitive training control home-based sessions will last a maximum of 20-25  
23 minutes to align with the same time frame as the cognitive training group. Participants  
24 will alternate between 2 different tasks (touristic searching using internet and video  
25 watching) completed using the same method as the intervention cognitive training (i.e.,  
26 on a computer within a quiet room in their home). In the first session, participants will  
27 receive a short introductory lesson on how to navigate the internet. For the touristic  
28 searching using internet, participants will be required to find 3 hotels, 3 touristic places,  
29 and 3 restaurants of their own preference in a city assigned by the instructor (a new city  
30 will be selected each session). They will also need to include the respective addresses  
31 of those places on their log sheet.

32 For the video watching task, participants will watch a National Geographic video on  
33 YouTube selected by the instructor with a different video selected for each session.  
34 They will watch the video for 20 minutes and during the remaining 5 minutes they will  
35 answer the following questions on their log sheet: 1) What is the video about? 2) What  
36 is the most important information in your opinion? 3) Create a question based on the  
37 video and answer your own question. Regardless of whether or not participants have  
38 completed the above control cognitive training tasks, they will be stopped at 25 minutes.

## 7.3 RANDOMIZATION

Upon completion of the baseline assessments (T0), participants will be randomly allocated to one of the four study arms (as shown in Figure 1). Randomization will be completed by Nellie Kamkar, the study Research Coordinator located at Lawson Research Health Institute in Parkwood Hospital, London Ontario, who will distribute randomization codes (using a random number generator) to determine the treatment arm to which each participant is allocated. Assessors and Research Assistants administering the interventions will be blinded and as such, only Nellie Kamkar and Andrew Sexton (the project manager at the University of New Brunswick) will have access to the randomization lists.

### 7.3.1 Method

The randomization sequence of the participants will be generated centrally using a simple excel formula that generates a random number within a sequence. A block randomization by four will be applied to ensure an appropriate balance of the participants between each arm. Permuted blocks will be employed to ensure balance over time. This trial includes 4 possible treatment arms: 1) AE+RT and NEUROPEAK™; 2) AE+RT and WS+V; 3) BAT and NEUROPEAK™; 4) BAT and WS+V. Simple randomization will not necessarily ensure that an equal number of participants will be allocated to each group (for example, we may randomly have a large proportion of participants in one group and very few or none in another). Block randomization ensures that this does not occur. Every four participants will be put into a block. For example, the first block (Block A), will consist of our first participant whose treatment arm allocation will be determined using a random number ranging from 1 to 4 (each representing the respective arms listed). Let's assume that this number happened to be 3 (BAT and NEUROPEAK™). Then, for the next participant in the block, a random number ranging from 1 to 3 will be generated (with all treatment arms *except* the BAT and NEUROPEAK™). Now, the number 1 represents AE+RT and NEUROPEAK™ (like before), the number 2 represents AE+RT and WS+V (also like before). But the number 3 represents BAT and WS+V (what used to be arm 4). This ensures that the second participant will be randomly allocated to a different arm than the first participant. The

1 third participant in Block A will be randomly assigned to one of the two remaining arms  
2 and the fourth participant will be assigned to the last remaining arm.  
3  
4

### 6 **7.3.2 Procedure**

7 Each participant will have an allocated sequential randomization number. After the  
8 baseline assessment, the SYNERGIC@Home Research Coordinator at UNB (not  
9 involved in measurement or intervention) will access the randomization list to determine  
10 the arm allocation for the participant. The Research Coordinator will maintain a separate  
11 file stored in SharePoint (accessible only by the Coordinators and PI's) that links the  
12 participant's ID with their treatment group allocation.  
13  
14  
15  
16  
17

## 19 **7.4 BLINDING**

20  
21 In order to minimize a source of bias, this is a double-blinded study. Research  
22 personnel performing the outcome assessments will be blinded to group allocation.  
23 Participants will be blinded to the intervention received and study hypotheses.  
24  
25  
26

### 28 **7.4.1 Maintaining Blinding**

29 Only the designated Research Assistants (RAs) delivering the interventions will know  
30 the treatment group that participants belong to. As part of the training for RAs during on-  
31 boarding (in our trial SoP), they will be informed of the importance of blinding and  
32 instructed to avoid conversing with participants in a way that could reveal their group  
33 membership.  
34  
35  
36  
37  
38

39 Participants will be informed at consent and reminded at enrollment of the importance of  
40 blinding and that they should refrain from discussing their treatment program with  
41 friends and family and especially with others they may know that are participating in the  
42 study.  
43  
44  
45  
46

### 47 **7.4.2 Unblinding**

48  
49 If it is medically necessary to un-blind a participant during the trial, the RA assigned to  
50 doing the assessments or interventions will contact the study Physician and Principal  
51 Investigators to discuss the reason for the code to be broken. If it is deemed relevant to  
52 unblind the participant the study Physician will contact the Research Coordinator to  
53 break the blinding. The participant will then withdraw from the study.  
54  
55  
56  
57

### 7.4.3 Debriefing

At the end of the trial (immediately after participants complete their T10 assessment), participants will be unblinded such that a research assistant divulges the exact condition that the participant was randomly allocated to. During this debriefing session, participants will have an opportunity to ask questions and to give feedback.

## 7.5 EARLY WITHDRAWAL

Participants will be withdrawn from the study if: 1) they no longer wish to continue their participation in the study (voluntary withdrawal), or 2) in the opinion of one of the study physicians, it is medically necessary to withdraw the participant (medically necessary withdrawal).

### *Voluntary withdrawal*

Participants who inform their Intervention Research Assistant (RA) that they wish to voluntarily withdraw will be asked by the Intervention Coordinator (to protect blinding) if they would be willing to continue their participation in either intervention on its own and return for their follow-up assessments. For example, a participant who indicates that s/he would like to withdraw from the exercise intervention will subsequently be asked if s/he would be willing to continue with the cognitive training intervention on its own, and to return for T4 and T10 assessments. Or if they wish to discontinue both interventions, s/he would be asked if they would agree to return for T4 and T10 assessments.

If the participant remains in the study with either of these scenarios, they will not be withdrawn from the study provided they agreed to at least the T4 assessment. Voluntary non-adherence will be captured by entering 0 values in their intervention logs for the remainder of the weekly session(s) they withdrew from. These participants will also be considered eligible for the one-on-one interviews planned after the T10 assessment.

If the participant wishes to completely withdraw from the study, s/he will be asked to complete the Exit Survey (which will be mailed out to them) and will subsequently be withdrawn from the study. Voluntary non-adherence will be captured by entering 0 values in their intervention logs for the remainder of the weekly session(s) they withdrew from, and intention-to-treat applied to imputing follow-up assessment scores.

### ***Medically necessary withdrawal***

Medically necessary withdrawals may be required if participants experience unanticipated AEs or SAEs that cannot be readily ameliorated and would, in the judgement of a study physician, place the participant at risk of harm if they continued to participate in the study. Changes in medication or health status during the course of the study are other reasons for consideration of medically necessary withdrawal.

Upon first recognition of a medical issue being experienced by a participant, the Intervention RA will immediately notify the Intervention Coordinator, Clinical Research Coordinator/ Nurse, and the Lead Study Physician, who will provide direction to the Intervention Coordinator as to the whether or not the intervention should continue, be modified or stopped within 24 hours of receiving the information. A follow up telephone or videoconference session will be arranged as soon as possible (24-48 hours during the week) to review the situation, which may or may not involve the participant. The purpose of this meeting will be to arrive at a decision related to withdrawal of the participant to protect their health and welfare and to ensure that participant is receiving appropriate care.

If it is deemed medically necessary to withdraw the participant, the Clinical Research Coordinator/Nurse and/or Study Physician will meet with the participant (if not already) to follow up with the participant and review the reasons for withdrawal and to inquire about the elements of the study that may have led to their change in health status. If willing, the participant will be asked to complete the Exit Survey either verbally during that meeting or have it mailed out to them for them to return to the Clinical Coordinator and will subsequently be withdrawn from the study. These participants adherence will be measured relative to their time in the study, and intention-to-treat applied to imputing follow-up assessment scores.

## **7.6 MIXED METHODS DESIGN: EXPERIENCE OF STUDY PARTICIPANTS**

One of the secondary feasibility objectives as described at the outset aims to measure the experience of study participants who have participated in this intervention trial being conducted in home-based, on-line settings using *Zoom for Healthcare*®. Using key concepts such as satisfaction, knowledge gained, motivation/commitment, adherence,



and benefits, and challenges, we will collect data about the feasibility of conducting a home-based, on-line intervention trial with an older, community-dwelling population.

### 7.6.1 Mixed Methods Design

An explanatory sequential mixed methods design will be used<sup>101</sup> where qualitative data will be collected to explore quantitative findings. This design is implemented in two phases where initially data collected using a quantitative instrument in the first phase is followed by a qualitative phase. Using mixed methods enables the quantitative results to be “sequentially” explored in more detail through this phase two qualitative approach.

A questionnaire (Appendix D) will be administered to the 64 study participants upon completion of the study intervention (T4). Semi-structured interviews will be conducted with study participants using the guide in Appendix E following the completion of their six month post-intervention follow-up assessment (T10).

### 7.6.2 Data Collection Instruments

Questions developed for both the quantitative and qualitative instruments were constructed using Kirkpatrick’s (1975) framework—a four-level model that has been used to assess participants’ benefits and experiences with different types of programs<sup>4</sup>. This framework consists of four dimensions as illustrated in Table 7 and has been used in numerous settings to conduct a process-focused program evaluation.

**Table 7.** Kirkpatrick’s Framework for Evaluation of Participant Experience

| Kirkpatrick’s Framework for Evaluation |                                                                                                                                                                                                                      |
|----------------------------------------|----------------------------------------------------------------------------------------------------------------------------------------------------------------------------------------------------------------------|
| Dimension                              | Possible Areas for Exploration                                                                                                                                                                                       |
| <b>Reaction</b> (to research study)    | <ul style="list-style-type: none"> <li>• How did participants feel about components of the study?</li> <li>• Were participants satisfied with the research team members implementing the intervention(s)?</li> </ul> |

| Kirkpatrick's Framework for Evaluation                                                    |                                                                                                                                                                                                                                                                                                                                                        |
|-------------------------------------------------------------------------------------------|--------------------------------------------------------------------------------------------------------------------------------------------------------------------------------------------------------------------------------------------------------------------------------------------------------------------------------------------------------|
| Dimension                                                                                 | Possible Areas for Exploration                                                                                                                                                                                                                                                                                                                         |
| <b>Learning</b> (new knowledge / skills; what knowledge / skills unlearned)               | <ul style="list-style-type: none"> <li>• What new knowledge and skills were learned? Any new knowledge about how to improve thinking and memory?</li> <li>• Did participants become aware of new evidence-informed practices that required them to 'unlearn' skills? For example, was there new learning with respect to physical exercise?</li> </ul> |
| <b>Behaviour</b> (change in behaviour as a result of participating in the research study) | <ul style="list-style-type: none"> <li>• What does the participant identify as changes in behaviours as a result of participating in the study?</li> <li>• What new skills were learned?</li> <li>• What were motivators to change?</li> </ul>                                                                                                         |
| <b>Results</b> (Measurable outcomes)                                                      | <ul style="list-style-type: none"> <li>• Benefits identified by participants</li> </ul>                                                                                                                                                                                                                                                                |

### 7.6.3 Participant Exit Questionnaire

The purpose of using a quantitative instrument (Appendix D) is to obtain a snapshot of the study circumstances and logistics from the participants' perspective. Upon completing the study intervention (at T4) each participant will be sent a one-page, short-form questionnaire via email. This questionnaire consists of 19 closed-ended questions using a 5 point Likert scale and one open-ended question. The questions consist of alternating positive and negative statements which collect participants' impressions about their experience and satisfaction with various elements of this study; i.e., such as using a computer or video-conferencing to complete the intervention and assessments. Study participants will either return the scanned questionnaire by email or mail a completed hard copy to the research coordinator using a stamped, self-addressed envelope.

#### 7.6.3.1 Quantitative Data Analysis

The results of these questionnaires will be analyzed using a standard statistics software program such as SPSS. Descriptive statistics for the anonymized questionnaires will be compiled such as the number of responses, the percentages for each question, and the group mean and standard deviation.

## 7.6.4 Participant Semi-Structured Interview

A semi-structured interview guide has been developed (Appendix E) consisting of question that ask participants to comment on their study experiences. For example, the benefits of this research approach for exercise and cognitive training programs including their reaction to the type of training they completed, their user satisfaction, the ease of participation in a virtual setting, the quality of information received; and support provided by research team members and the extent of burden and fatigued from completing the assessments will be explored.

### 7.6.4.1 Qualitative Data Analysis

Transcribed data from the interviews will be uploaded into NVivo, a qualitative software program used for data analysis by the team's qualitative researchers. Transcripts will be divided amongst the qualitative researchers. These team members will code the interview data, initially independently, and then meet as a group to arrive at a consensus of codes. Following coding of the data, through thematic analysis, themes and sub-themes will be generated to identify participants' perspectives of the feasibility, experience and satisfaction with this type of virtually delivered study. Study participants will be invited to review and validate the themes generated; this validation adds rigor to analysis, which ensures that the researchers "got it right".

## 7.6.5 Triangulation

The mixed methods design promotes methodical rigor. For this aspect of the study, triangulation of the findings takes place from two perspectives. Collecting both quantitative and qualitative data gives more insight than any one method will provide. In addition, having more than one member of the research team conduct the semi-structured interviews can significantly enhance the credibility of the findings and is particularly important for decreasing bias in gathering, analyzing data and/or reporting study findings.

## 7.7 COMPENSATION

In recognition for the participant's time commitment they will be given \$50.00 after the immediate post-intervention follow-up (T4) assessment and \$50.00 the 6-month post-intervention follow-up (T10), for a total amount of \$100. Compensation will be in the

1 form of gift cards to local grocers (Sobeys and Atlantic Superstore) and gas stations  
2 (Irving Circle K and Ultramar) of the individual's choice, or equivalent cash value paid by  
3 cheque.  
4  
5  
6  
7  
8  
9

## 10 **8. STATISTICAL CONSIDERATIONS**

### 11 **8.1 SAMPLE SIZE AND POWER ANALYSIS**

12  
13  
14 A total of 64 participants will be enrolled in the SYNERGIC@Home study. Participants  
15 will be randomly allocated to each of the four arms with 16 participants per arm. Power  
16 analysis was calculated a-priori using G\*Power 3.1 based on our primary analytic goal  
17 of assessing the relationship between intervention preference and subsequent  
18 adherence. Specifically, we plan on examining correlations among continuous variables  
19 with a final total sample size needed of 48 (25% loss) and with one-tailed analyses at  $\alpha$   
20 = .05 for two correlation tests (equivalent to a two-tailed test at  $\alpha = .1$ ), thus we will have  
21 96% power to detect a moderate to large effect size (of .5 or larger) and 82% power to  
22 detect an effect size of .4 or larger. For any  $r$  greater than .6, power will be well over  
23 99%, meaning that we will have greater than 99% power to explain a minimum of 36%  
24 of the variability in our dependent variable.  
25  
26  
27  
28  
29  
30  
31  
32  
33  
34  
35

### 36 **8.2 PLANNED DATA ANALYSIS**

37  
38 Descriptive statistics for demographic and baseline characteristics will be provided with  
39 means and standard deviations, or medians and the interquartile range where  
40 appropriate, for continuous characteristics, and frequencies and percentages for  
41 categorical variables. Analysis will be conducted as intention-to-treat (ITT) and as per-  
42 protocol analysis (PPA).  
43  
44  
45  
46  
47  
48

#### 49 **8.2.1 Primary Feasibility Outcomes**

50 Adherence to the interventions will be analyzed using a one-sample t-test that will test  
51 the hypothesis that participants complete at least 36 of the 48 (75%) scheduled  
52 interventions sessions. This test will be used to determine if the adherence is similar to  
53 hypothesize, better than hypothesized or worse than hypothesized.  
54  
55  
56  
57

## 8.2.2 Secondary Feasibility Outcomes

Enrollment recruitment target of 75% will be tested using a Chi-square goodness-of-fit test ( $\alpha=.05$ ) of actual distribution (# eligible and # screen fails) versus hypothesized distribution (75% and 25% of N). This test will be used to determine if the achieved distribution of eligible participants is similar to that hypothesized, significantly better than that hypothesized, or significantly lower than that hypothesized.

To answer the research questions pertaining to trial retention, we will examine proportions reaching our 75% enrollment retention target at the immediate post-intervention follow-up (T4) assessment and the 75% follow-up retention target at the 6-month post-intervention follow-up (T10) assessment with 95% confidence intervals (when possible). In addition, Chi-square good-of-fit test will also be used to quantify the significance of the difference between the observed and hypothesized proportions.

Assessment tolerability will use descriptive statistics (counts) to describe how many and under what circumstances (documented in CRF notes) that participants decided to drop out of the trial, not because of the interventions, but because of the extensive battery of testing they must undergo in order to start the trial.

Descriptive statistics will be used to analyze the quantitative Exit survey to determine where on the spectrum of satisfaction (completely unsatisfied to completely satisfied) participants fall in terms of the trial components (see Appendix D). Data will be analyzed using a two-way ANOVA on exercise intervention (active and control) and cognitive intervention (active and control) to determine if there is a significant interaction effect induced by the combined active treatments.

Adverse events will be analyzed using a Chi-square cross-tabulation analysis between AE severity and AE relation-to-trial. We will use this analysis to test the hypothesis that there is a relationship between AE severity and being in the trial. Furthermore, we will stratify the sample by treatment arm and use a Chi-square goodness-of-fit test to determine if AEs are distributed differently across treatment arms against the null hypothesis of an even distribution (no relation to treatment arm).

## 8.2.3 Primary Analytic Outcomes

For primary analytic outcomes examining the relationship between interest level in and adherence to the interventions, we will correlate interest level (responses given on the Intervention Preference Questionnaire, See Appendix A) for each intervention with adherence rates calculated from trial logs, using Pearson's  $r$ . This analysis will tell us if adherence to the trial is related to participants' affinity for any one or more interventions.

- **Interest in the Interventions:** Question 1 on the survey rates their interest in each intervention independently, **INT\_EX** and **INT\_CT**, on a 0-10 scale.
- **Intervention Preference:** The second question rates their relative preference for either intervention. This will generate a single variable that gives the relative preference (-2 to 2 scale), **PR**, where low scores prefer exercise and high scores prefer cognitive training. Because we will administer preference survey at baseline and then at 4mo, we will have two measures **PR1** and **PR2**. The difference scores (**dPR=PR2-PR1**) would be negative if their preference moved toward exercise, and positive if it moved toward cognitive training.
- **Intervention Allocated:** The treatment arms can be represented by two dummy (0,1) variables **EX\_ARM** and **CT\_ARM**.
- **Adherence to Interventions:** Adherence to the interventions at the end of the trial, **AD\_EX** and **AD\_CT**, is a continuous scale variable (% exercise and cognitive training sessions attended, respectively).

### 8.2.3.1 Analysis Plan

***What is the Relationship between Adherence and Intervention Interest?*** For each of the two interventions we will calculate the Pearson correlation coefficient ( $\rho_{X,Y}$ ) with a one-tailed alpha of .05.

H0:  $\rho_{X,Y} = 0$ , H1:  $\rho_{X,Y} > 0$ , where X=**INT\_EX** and Y=**AD**

H0:  $\rho_{X,Y} = 0$ , H1:  $\rho_{X,Y} > 0$ , where X=**INT\_CT** and Y=**AD**

Rejection of the null hypothesis for either test will allow us to conclude that interest level in the intervention type prior to the trial explains a significant amount of variance in adherence to the trial. Failure to reject the null hypothesis would suggest that prior

1 attitudes about the interventions does not influence how well they adhere to the  
2 interventions.  
3  
4  
5  
6  
7

### 8 8.2.3.2 Other Analyses 9

10 ***Which intervention type (physical exercise or cognitive training) do the majority***  
11 ***of participants prefer over the other?*** To answer this question we will use a single-  
12 sample t-test to test if the mean **PR** is directionally biased from the middle score (no  
13 preference).  
14  
15  
16

17  
18 ***What proportion of participants have no particular preference for either***  
19 ***intervention?*** To answer this question we will compute the proportion of participants  
20 that selected “Equal preference” response.  
21  
22  
23

24  
25 ***Do their attitudes change after completing the active interventions versus the***  
26 ***control interventions?*** To answer this question we will calculate the mean preference  
27 change **dPR** and test whether it is different from zero using a single-sample t-test.  
28  
29  
30

31  
32 ***Do participants adhere better if they receive the active treatments they prefer?***  
33

34 Because some participants will be randomly assigned to the active intervention that  
35 matches their preference and others will not (will get the control version of the  
36 intervention), we will transform the preference score into a logical variable **PR\_MET**  
37 (1=preference met, 0=preference not met).  
38  
39  
40  
41  
42

43 if (**PR1**<3 and **EX\_ARM**=1) or (**PR1**>3 and **CT\_ARM**=1),  
44  
45

46 then **PR\_MET**= 1, else **PR\_MET**=0  
47  
48

49 We will test the hypothesis that

50  $H_0: \rho_{X,Y} = 0$ ,  $H_1: \rho_{X,Y} \neq 0$ , where  $X=PR\_MET$  and  $Y=AD$

51 Rejection of the null hypothesis ( $p<.05$ ) will allow us to conclude that adherence to the  
52 interventions is significantly influenced by receiving the active intervention they prefer.  
53  
54  
55  
56  
57

### 8.2.4 Secondary Analytic Outcomes

Clinical and activity assessments will yield a rich source of information for quantifying effect sizes of trial outcomes. We will calculate Cohen's d effect sizes (mean difference/standard deviation) for cognitive, mobility and lifestyle outcomes (e.g., diet and sleep) listed in Table 2.

All statistical tests will be two-tailed, and a p-value of less than 0.05 will be considered to indicate statistical significance. All calculations will be made using the Statistical Package for the Social Sciences (SPSS version 23.0, SPSS Inc., Chicago, IL) and Stata (Stata Statistical Software: Release 14. College Station, TX: StataCorp LP.).

### 8.3 FREQUENCY OF THE DATA ANALYSES

Preliminary analysis will be performed after finishing recruitment to ascertain descriptive characteristics at baseline assessment. Interim efficacy analyses will be performed when recruitment is reaching 50% of target sample (N = 32) and final efficacy analysis will be performed at the end of the trial (N = 64, but 48 are need for final analyses), as no safety issues are anticipated in this study.

## 9. ADVERSE EVENTS

### 9.1 DEFINITIONS

#### 9.1.1 Adverse Event (AE)

An adverse event (AE) is any untoward medical occurrence in a subject that may present itself during the conduct of a research study and which may or may not have a causal relationship with the study procedures. An AE can therefore be any unfavourable or unintended sign (e.g., including an abnormal laboratory finding), symptom, or disease temporally associated with a study procedure. An AE may be a



1 new illness, worsening of a sign or symptom of a condition, or an effect from a study  
2 procedure.  
3  
4  
5

### 6 **9.1.2 Serious Adverse Event (SAE)**

7 A serious adverse event (SAE) is any untoward medical occurrence that:  
8  
9

- 10 • Results in death
- 11 • Is life-threatening, i.e., the subject was at immediate risk of death at the time of  
12 the event; it does not include any event which hypothetically might have caused  
13 death if it had occurred in a more severe form.
- 14 • Requires inpatient hospitalization or prolongation of existing hospitalization.  
15 Hospitalizations and/or surgical procedures that are scheduled to occur during  
16 the study period, for an illness or disease that existed before subject enrolment in  
17 the trial, will not be considered AEs provided the pre-existing condition did not  
18 deteriorate (e.g., surgery performed earlier than the planned date).
- 19 • Results in persistent or significant disability/incapacity

20  
21  
22  
23  
24  
25  
26  
27  
28  
29 Medical and scientific judgement should be exercised in deciding whether expedited  
30 reporting is appropriate. In other situations, such as important medical events that may  
31 not be immediately life-threatening or result in death or hospitalization but may  
32 jeopardize the subject or may require intervention to prevent one of the other outcomes  
33 listed in the definition above. These should also usually be considered serious.  
34  
35  
36  
37  
38

## 39 **9.2 CLASSIFICATION**

### 40 **9.2.1 Severity**

41 Adverse events will be classified as mild, moderate or severe in severity as follows:  
42  
43  
44

- 45 • **Mild:** Discomfort noticed but no disruption of normal daily activity.
- 46 • **Moderate:** Discomfort sufficient to reduce or affect normal daily activity.
- 47 • **Severe:** Incapacitating with inability to work or perform normal daily activity.

48  
49  
50  
51  
52 The term “severe” is often used to describe the intensity (severity) of a specific event  
53 (as in mild, moderate, or severe myocardial infarction); the event itself, however, may  
54 be of relative minor medical significance (such as severe headache). This is not the  
55  
56  
57

1 same as “serious”, which is based on subject/event outcome or action criteria usually  
2 associated with events that pose a threat to a subject’s life or functioning. Seriousness  
3 (not severity) serves as a guide for defining regulatory reporting obligations.  
4  
5

## 6 7 8 **9.2.2 Attribution**

9 The relationship of the AE to study procedure will be assessed by the investigator to be  
10 not related, unlikely, possible, probable or definite, as follows:  
11

- 12  
13  
14 • **Not related:** No relationship between the AE and the study procedure, judged  
15 clearly and incontrovertibly due to extraneous causes such as concomitant  
16 medication(s) or the subject’s clinical state.  
17
- 18  
19 • **Unlikely:** The AE is more likely due to an alternative explanation such as  
20 concomitant medication(s), concomitant disease(s) and/or the time relationship  
21 suggests that a causal relationship is unlikely.  
22
- 23  
24 • **Possible:** The AE might be due to a study procedure. An alternative  
25 explanation such as concomitant medication(s), concomitant disease(s) is  
26 inconclusive. The time relationship is reasonable therefore the causal  
27 relationship cannot be excluded.  
28
- 29  
30 • **Probable:** The AE might be due to a study procedure. An alternative  
31 explanation such as concomitant medication(s), concomitant disease(s) is less  
32 likely. The time relationship is suggestive, i.e. it is confirmed by de-challenge.  
33
- 34  
35 • **Definite:** The AE cannot be reasonably explained by an alternative explanation  
36 such as concomitant medication(s), concomitant disease(s). The time  
37 relationship is very suggestive, i.e. it is confirmed by de-challenge and re-  
38 challenge.  
39  
40  
41  
42  
43

44 For the purposes of safety analyses, all SAEs classified with a relationship to a study  
45 procedure of possible, probable or definite will be considered study-related events.  
46  
47  
48

## 49 **9.3 PROCEDURES FOR AE AND SAE REPORTING**

### 50 51 **9.3.1 Adverse Event (AE) Reporting**

52 All AEs experienced by the subject between the signing of the Informed Consent and  
53 discontinuation of the study will be reported. All AEs must be recorded in the CRF. For  
54  
55  
56  
57

1 both serious and non-serious AEs, the investigator must determine both the intensity of  
2 the event and the relationship of the event to study procedures.  
3  
4

### 6 **9.3.2 Serious Adverse Event (SAE) Reporting**

7 All SAEs will be recorded in the CRF starting from the time of the signing of the  
8 Informed Consent up to and including the end of study. All SAEs, regardless of the  
9 relationship to study procedures, must be reported within one working day of site  
10 personnel being notified of the occurrence of the event.  
11  
12  
13

14 SAE forms will be provided to each study site. The initial SAE report should include at a  
15 minimum: subject number, a narrative description of the event, and an assessment by  
16 the investigator of the intensity of the event and relationship of the event to study drug.  
17 The initial SAE report received from the site should be complete as soon as possible. A  
18 complete follow-up SAE report must be submitted when the information, not available at  
19 the time of the initial report, becomes available. The sponsor (or designee) may request  
20 SAE follow-up information.  
21  
22  
23  
24  
25  
26  
27

28 Any SAE that occurs at any time after completion of the study, which the investigator  
29 considers to be related to study procedures, must be recorded in the CRF.  
30  
31  
32

33 All SAE will be submitted to the REB.  
34  
35

### 36 **9.3.3 Period of Observation**

37 All AEs should be monitored to determine the outcome or until the investigator  
38 considers it medically justifiable to terminate follow-up.  
39  
40  
41

42 All SAEs should be monitored until resolved or until the SAE is clearly determined to be  
43 due to a subject's stable or chronic condition or intercurrent illness(es).  
44  
45  
46

## 47 **10. ETHICAL AND OPERATIONAL CONSIDERATIONS**

48 This study is conducted in compliance with International Conference on Harmonization  
49 Good Clinical Practice (ICH-GCP) and all applicable regulatory requirements. This  
50 SYNERGIC@Home study will undergo review and approval from the Research Ethics  
51 Committees/Boards of Vitalité Health Network In Moncton, New Brunswick, Horizon  
52  
53  
54  
55  
56  
57

1 Health Network in Fredericton, New Brunswick, the University of New Brunswick in  
2 Fredericton New Brunswick, and Université de Moncton in Moncton, New Brunswick.

## 6 **10.1 ETHICAL CONSIDERATIONS**

### 8 **10.1.1 Informed Consent**

9  
10 When potential participants have self-identified as being interested in learning more  
11 about the study to decide if they want to participate, the Clinical Research  
12 Coordinator/Nurse will contact the individual to discuss an overview of the study. If they  
13 are interested in pursuing more information the informed consent will be emailed or  
14 mailed to them for their review. Potential participants will be given a copy of the  
15 informed consent form in their language of choice.

16  
17  
18  
19  
20  
21 After the potential participant agrees to be considered for recruitment the clinical  
22 research coordinator/nurse will arrange a time for a more detailed videoconference  
23 meeting for the Screening Visit. Opportunity for discussion of the study and Informed  
24 consent will be provided and all questions will be answered. The informed consent will  
25 be completed and signed prior to beginning any study related assessments/procedures.  
26 Signing of the consent will be done via videoconference and then returned by mail using  
27 a stamped, self-addressed envelope to the clinical research coordinator/nurse who will  
28 then sign it and file the original with the participant research documents. A final signed  
29 copy of the informed consent will be provided to the participant either by email or mail  
30 depending on their choice.

31  
32  
33  
34  
35  
36  
37  
38  
39  
40 Optionally, the participant will be asked to show the clinical research coordinator/nurse  
41 their signed informed consent form over the video-call so that they can ascertain and  
42 verify that the form has been signed in all the appropriate locations. Once verified, the  
43 clinical research coordinator/nurse will consider the participant to be consented for the  
44 study and will proceed with scheduling the study assessments and procedures and will  
45 not be required to wait until the returned mailed consent form is received before  
46 proceeding with the study.

### 10.1.2 Confidentiality and Privacy

Participants' private and identifiable information will be held in strict confidence and will not be shared outside the research team, with the exception of enforcement of applicable civil or federal laws. Research team members will only have access to private and identifiable information on a need-to-know basis or as necessary for carrying out their study tasks.

Due to the COVID-19 pandemic, many research team members will be working from a home environment. All RAs involved in assessing or delivering interventions to study participants will be provided a secure UNB laptop administered by the study Project Manager. The study laptop may only be used for study related activities and must be used for all videoconferencing activity and data storage. All research coordinators in the Health Network will be working within their institutions or from a home environment. They will be provided a secure Health authority laptop administered by Service New Brunswick. All connection will be protected behind the institution firewall. Research team members and investigators will be prohibited from discussing participant cases or sharing of private and identifiable information by email or non-secure videoconferencing.

### 10.1.3 Biospecimen Collection Privacy

To ensure participant privacy and confidentiality in biospecimen collection, storage, shipment, participants will be instructed to print their study ID number on their saliva sample box (rather than their name) and to ensure that their name or any personally identifiable information is *not* indicated on their sample box. They will be given mailing materials to pack their sample in and will be given instructions on how to mail the sample back for analysis. This is in accordance with standard operating procedures for storing, shipping, and handling of bio-samples for research purposes.

## 10.2 STUDY SAFETY AND MONITORING COMMITTEE

There will be a Study Safety and Monitoring Committee that will consist of all NB-PALM principal investigators and site physicians, project manager and research coordinator(s), as well as a physician not associated with the study (TBD) and a community member (TBD). This committee will be responsible to receive all reports of AEs and SAEs

1 reported for any participant as well as to monitor the overall operations of the entire  
2 research project. A log of these reports will be kept and reviewed regularly to monitor  
3 the safety of the clinical trial.  
4  
5

### 6 7 8 **10.3 RISK MANAGEMENT AND SAFETY MONITORING PLAN** 9

10 All participants will be monitored by trained research staff, and should any adverse  
11 events arise, the research team directly working with the participant will notify the  
12 Clinical Research Coordinator/Nurse, who will gather and document the appropriate  
13 information and will contact the Physician Principal Investigator and/or Study Physician.  
14 Adverse events will be documented as described above in Section 10.  
15  
16  
17

18  
19  
20 Participants will be given a phone number and e-mail address to contact if there is an  
21 adverse event, or they may report AEs at the start of their training session with the RAs  
22 delivering their interventions. There will be a member from the research team available  
23 to assist with this Monday to Friday 0800-1600 (excluding statutory holidays). All  
24 participants will be encouraged to use the contact information provided to them to ask  
25 any non-urgent questions and address their concerns throughout the entirety of the  
26 study trial.  
27  
28  
29  
30  
31

32  
33 In order to ensure that participant safety is the utmost focus of the research project, we  
34 have put forth the following plan and answered the following risk management and  
35 safety monitoring questions:  
36  
37  
38

#### 39 **10.3.1 Safety Monitoring** 40

41 Participant safety will be regularly monitored during each assessment and intervention  
42 session using an ongoing paper log. This log will be filled out by the study assessor  
43 conducting the intervention session and she/he will insert detailed session notes  
44 pertaining to the events that transpired during each event. This log will be reviewed by  
45 the clinical research coordinator/nurse and if there are any concerns it will be reported  
46 to the physician principal investigator and/study physician. These will be reported to the  
47 Safety and Monitoring Committee on a monthly basis.  
48  
49  
50  
51  
52  
53  
54  
55  
56  
57

### 10.3.2 Withdrawal for Safety Reasons

During their intervention sessions which occur three times per week, participants will be monitored the Research Assistant administering the intervention. Any concerns that are medical in nature will be communicated to the Clinical Research Coordinator/nurse. Further information will be collected from the patient by the nurse and the physician principal investigator/study physician will be notified. Follow up on any medical matters will be done by the nurse and/or physician as required. If further medical care is needed the participant will be referred to their primary care physician/provider for follow up. A decision regarding early withdrawal from the study will be made by the principal investigator/study physician and all the appropriate document will be completed.

### 10.3.3 Study-wide Stopping Rules

In light of the fact that this intervention program has been implemented previously in the SYNERGIC trial, it is unlikely that this study would be required to stop early due to safety concerns. However, SYNERGIC@Home will be conducted remotely so it is possible that adverse events may arise that are not anticipated requiring the entire study to stop. The decision to stop the study early will rest with Study Safety and Monitoring Committee.

## 10.4 INCIDENTAL FINDINGS

Incidental findings include any previously undiagnosed medical finding observed throughout the trial, identified purely accidentally within the research trial. Any incidental findings observed throughout the trial will be addressed by the Clinical Research Coordinators/Nurse and Physician Principal Investigator/Study Physician. All incidental findings will be appropriately documented. Depending on the finding the participants' primary care physician/provider will be contacted so that appropriate follow up and care if necessary is received. All findings and their follow-up actions will be documented and monitored until it has been resolved or as long as the participant remains in the study.

## 10.5 PROTOCOL DEVIATIONS

A protocol deviation occurs when the activities of the study deviate from that which is detailed in the study protocol. All research staff will make it their priority to ensure that

1 the protocol is abided by as closely as possible. However, in the event that a participant  
2 deviates from the protocol, a protocol deviation form (see Appendix I) will be filed and  
3 details pertaining to the deviation will be noted in a hard copy stored in locked cabinets  
4 on the UNB campus. Attempts will be made to return to study procedure as outlined in  
5 the protocol as much as possible and as swiftly as possible.  
6  
7  
8  
9

## 10.6 DATA MANAGEMENT AND STORAGE

### 10.6.1 Primary Source Data

15 Primary source data will be stored using SharePoint, a secure platform through the  
16 University of New Brunswick to which only designated research staff have access.  
17 Primary source data are defined as the copies of the original hard copy assessment  
18 forms completed by the research team member conducting the assessments along with  
19 any hard copy self-report questionnaires and other study document sent by a participant  
20 of collected by the site research coordinators. Hard copies of any data collection forms  
21 will be stored in locked cabinets located at the workplaces of study research staff and  
22 accessible only by study staff.  
23  
24  
25  
26  
27  
28  
29

### 10.6.2 Secondary Source Data

31 Upon completion of the study, all data collected in paper form with the unique  
32 identification numbers will be uploaded to the Longitudinal Online Research and  
33 Imaging System (LORIS) system (<https://ccna.loris.ca/>) at the McGill Centre for  
34 Integrative Neuroscience, McGill University, Montreal, Quebec. The LORIS is an OPEN  
35 SOURCE toolset framework for storing and processing behavioural, clinical,  
36 neuroimaging and genetic data. LORIS is designed to simplify management of large  
37 datasets acquired over time in a longitudinal study, and at different locations in a multi-  
38 site study. It provides a secure web-based access to data validation and quality control  
39 modules, as well as visualization and basic statistical tools. The LORIS servers in which  
40 the data is stored are physically located on the McGill University campus, in a secure  
41 data facility. Study staff will enter data into LORIS via web-portal.  
42  
43  
44  
45  
46  
47  
48  
49  
50

### 10.6.3 Video and Audio Recording

51 All study procedures including intervention sessions (physical activity and cognitive  
52 training) will occur via Video Conferencing using *Zoom for Healthcare*®. The screening  
53  
54  
55  
56  
57



1 and baseline (T0), immediate post-intervention follow-up (T4), and 6-month post-  
2 intervention follow-up (T10) assessments will be video and audio recorded. In addition,  
3 a subset of 3 intervention sessions will be selected to be video recorded per participant  
4 for quality control. Anytime during which participants will be video recorded, they will be  
5 told ahead of time that their session will be video recorded.  
6  
7  
8  
9

10  
11 The audio and video recordings will only be accessed by members of the research team  
12 to verify the data that is needed for populating the assessment forms. Once scores are  
13 verified from video and audio recordings, they will be transferred to the Case Report  
14 Forms and data will be input into a data collection sheet (Appendix F) for input to LORIS  
15 as described in section 11.6.2. Data will only be linked to each study participant's  
16 unique study identification number. The audio and video recordings, will be stored at  
17 UNB on a secure Sharepoint server and discarded after the data has been transferred.  
18 Recordings will never be shared, uploaded or distributed to any individuals or  
19 organizations outside of the research team. Data obtained from the ActiGraph GT9X  
20 devices (i.e., gait parameters, heart rate, and sleep cycle data) will also be stored at  
21 UNB on a secure Sharepoint server and discarded after it has been transferred.  
22  
23  
24  
25  
26  
27  
28  
29  
30

31 Participant names will not be associated with their video recording and participants will  
32 be asked to set their *Zoom for Healthcare*® user password as their initials. Video and  
33 audio recordings will be discarded after their data has been extracted.  
34  
35  
36

### 37 **10.7 FUTURE USE OF STORED SPECIMENS AND DATA**

38  
39  
40 Biological samples will be stored at the Clinical Genomics Centre in the Mount Sinai  
41 Hospital, 600 University Ave, Toronto, ON M5G 1X5, Canada and will be processed  
42 under the guidance of Dr. Kathy Siminovitch. Approximately half of the samples will be  
43 used for planned analyses (polygenic hazard score (PHS) testing). The rest may be  
44 available for investigators who wish to perform further analyses on the whole cohort or a  
45 subset. Participants will be asked if they are willing to be contacted at a later date to be  
46 asked whether or not they consent to have their sample biobanked for future research  
47 use. Only participants who consent being contacted at the later date, and then consent  
48 to biobanking their sample for future studies will have their sample analyzed for other  
49 purposes, the samples from patients who didn't agree for this biobanking will be  
50  
51  
52  
53  
54  
55  
56  
57

1 destroyed. Access to these samples will be regulated by the Biological Sample Access  
2 Committee which is made up of members of CCNA (members list available on request).  
3 Requests for access will be assessed for feasibility, scientific rigour, and alignment with  
4 the consent of the participants. In order to be granted access to samples, investigators  
5 must agree that the data they generate from the samples will be included in the larger  
6 CCNA database on LORIS within 2 years of sample batch receipt. Samples will be  
7 shared within Canada only for a period of 3 years after the last sample has been  
8 collected. After that 3-year period, they will be available to international researchers, if  
9 not already depleted. The full Biological Sample Access policy document is under  
10 development and will be made available upon its finalization.  
11  
12  
13  
14  
15  
16  
17  
18

19 PHS testing is still in its early embryonic stages in terms of clinical development and  
20 while it holds great promise for clinical utility in the future, it is not currently a validated  
21 diagnostic tool used in medical practice.<sup>102</sup> Thus, the research team will be entirely  
22 transparent with participants and inform them at the study outset that their results will  
23 not be shared with them or their healthcare professional—as it is not currently a  
24 diagnostic tool. Any and all published work from the data will only include group  
25 statistics (and not individual trends) and will always include de-identified participant  
26 identification numbers (and not participant names).  
27  
28  
29  
30  
31  
32  
33

## 34 **10.8 PUBLICATION AND DATA SHARING POLICY**

### 35 **10.8.1 Dissemination of Study Findings**

36 Prior to submission for publication or for presentation of any data or results obtained in  
37 this study, notification of the study Investigators (Principal and Co-Principal  
38 Investigators) is required. Draft manuscripts, abstracts and presentations should be  
39 submitted to the study Investigators for review and approval well in advance of  
40 applicable submission deadlines.  
41  
42  
43  
44  
45  
46  
47

### 48 **10.8.2 Authorship**

49 Authorship of publications resulting from this study should accurately reflect the  
50 academic contribution of individuals to the design and implementation of the trial,  
51 analysis of the data and preparation of the manuscript. No researcher shall include  
52 identifiable personal health information in any publication or presentation.  
53  
54  
55  
56  
57

### 10.8.3 Data Ownership

The University of New Brunswick will retain the ownership of the data obtained in this study. All publications that arise from the use of data will give acknowledgement, attribution, or co-authorship as appropriate in accordance with the International Committee of Medication Journal Editors (ICMJE) standards.

## 11. DISCUSSION

Older adults at risk for ADRDs have incident rates of related syndromes several times higher than their cognitively healthy counterparts<sup>103</sup>. Additionally, these populations of individuals at risk for ADRDs have an increased risk of falling and mobility decline<sup>104,105</sup>. Physical exercise, and cognitive training are emerging and promising non-pharmacological interventions to enhance mobility and cognitive functioning in older adults, especially in pre-dementia states prior to onset. These interventions have been tested separately, with positive results for physical exercise and cognitive training in improving cognitive function<sup>30,32,35,42,46</sup>. To our knowledge, this is the first study establishing the feasibility of conducting an entirely home-based combined exercise and cognitive training intervention program for older adults at risk for ADRDs.

### 11.1 SIGNIFICANCE OF ESTABLISHING FEASIBILITY

The goal of establishing the feasibility of conducting a home-based combined intervention program is critical, as it has the potential to inform other researchers on the logistics of designing remote intervention programs. In addition, in light of the physical distancing procedures implemented worldwide after the 2020 COVID-19 pandemic—many older adults have been further isolated in their homes. The SYNERGIC@Home trial is one of the first studies that has adapted to these unique times, allowing older adults to take part in various intervention and assessment procedures from the safety and comfort of their homes. If successful, the methodology and procedures tested in this feasibility trial will set the standard for a new platform in which participants are no longer restricted to intervention studies conducted in a physical laboratory.

## 11.2 SIGNIFICANCE OF EXAMINING INTERVENTION PREFERENCE

To address our primary analytic goal of assessing participant's intervention preference, we will examine the potential relationship between preference given for an intervention and the subsequent efficacy of it. We will assess participant's preference both prior to and after the intervention and correlate these values with their adherence to the intervention that they were randomized to receive. If we find that preferences given prior to intervention are strongly related to subsequent intervention compliance/adherence—then our data will provide unique insights on factors related to the success of lifestyle modification trials with community-dwelling older adults. We may find that strong preferences are weakly correlated with our measures of intervention fidelity. This will suggest that subsequent intervention trials will not benefit from the added complexity and cost associated with formally estimating preference effects in randomized control trials of future intervention studies. Therefore, regardless of the results of our primary analyses, we believe that the SYNERGIC@Home trial will provide unique insights the relationship between intervention preference and subsequent fidelity.

## 11.3 SIGNIFICANCE OF SECONDARY OUTCOMES

We believe that the two combined interventions of physical activity and cognitive training used in conjunction will lead to a cascade of improvements on our secondary outcomes, such that those in the combined intervention groups will outperform the control groups on tests of cognitive functioning. We further believe that, if successful, the combined intervention will further demonstrate a delay in their progression to dementia. The reasons why each of the interventions will pose benefits to cognitive, neurological, physical, and psychological health are delineated below.

## 11.4 BENEFITS OF INTERVENTIONS

### 11.4.1 Benefits of Exercise

Mechanistically, AE and RT exercises can provoke a cascade of biochemical, physiological, and structural changes in the brain including increases in blood flow, neurotrophic factor release, neurogenesis, immune system efficacy and metabolism. These effects of exercise could combat inflammatory processes and the atrophy of brain structures both often associated with aging and ADRDs<sup>32,34</sup>. Interventions using

1 RT exercises have found substantial improvements in high-order cognition (e.g.  
2 executive functions), whereas low-order cognition (e.g. attention, processing speed) is  
3 less benefited<sup>34</sup>. The reason for this selective improvement in cognition is unknown, but  
4 it is hypothesized that areas in the brain that modulate executive functions are more  
5 susceptible to both aging and physical exercises interventions. Mechanisms suggested  
6 involve modulation of insulin-like growth factor-1 and insulin sensitivity, decreasing  
7 inflammation, enhancing release of brain-derived neurotrophic factor pathways, and  
8 even decrease brain amyloid load.<sup>35,106,107</sup> Combined exercise interventions have also  
9 shown increased brain volume and muscle mass in older adults.<sup>93</sup>

#### 11.4.2 Benefits of Cognitive Training

19 Cognitive training can also improve cognition through enhancing brain functioning.  
20 Individuals who practiced monitoring of two tasks at the same time (i.e. dual-task  
21 training) on computer devices have presented with improved connectivity between  
22 prefrontal and temporal cortices, areas known to be important for executive functioning  
23 and memory, when compared to control participants.<sup>40</sup> Furthermore, imaging in these  
24 participants showed increased activity in these cortical areas during resting state, as  
25 shown by increased blood flow. With this, implementing a dual-task cognitive training  
26 program in older adults has the potential to selectively improve high-order cognitive  
27 functioning through brain plasticity and improved activation.

#### 11.5 STRENGTHS AND CONCLUDING REMARKS

38 To our knowledge, this feasibility randomized control trial is the first to test the feasibility  
39 of implementing a combined physical aerobic exercise and resistance training program  
40 with cognitive training program at home to improve cognition in a sample of community-  
41 dwelling older adults at risk for ADRDs. We also believe this is one of the first home-  
42 based intervention trials for older adults, in which all aspects of the study protocol are  
43 being administered remotely. With this study, we will build capacity in implementing a  
44 multifaceted home-based intervention to delay dementia in a sample of community-  
45 dwelling older adults. We will also establish the extent to which measuring participant  
46 preference for a given intervention is related to subsequent adherence and compliance  
47 to the intervention treatment. We believe that this will inform other researchers and  
48 scholars alike on whether or not the costs and efforts associated with tailoring  
49

1 interventions in future studies to match participant preferences are a worthwhile  
2 endeavor.  
3

4  
5  
6 Furthermore, we are collaborating with a team of expert engineers and scientists to  
7 collect and examine a wealth of data from the actigraphy devices (ActiGraph GT9X).  
8 This collaboration with an engineering team will allow us to collect and analyze a large  
9 subset of objective measures of sleep and wake cycles, cardiovascular measures  
10 including heart rate, and mobility and gait parameters on a continuous basis.  
11  
12

13  
14  
15 In conclusion, SYNERGIC@Home will build capacity for future research RCT design  
16 using home-based interventions in older adults at risk for ADRDs.  
17  
18  
19  
20  
21  
22

## 23 **12. RESEARCH TIMELINE**

24  
25  
26 We wish to begin this project in January 2021. This study will be completed within two  
27 years of its start date: end date estimated for October 31, 2022. It is anticipated that  
28 patient recruitment will occur over at least a 10-month period and could be extended  
29 beyond this time depending on the results obtained.  
30  
31  
32  
33  
34  
35  
36  
37  
38  
39  
40  
41  
42  
43  
44  
45  
46  
47  
48  
49  
50  
51  
52  
53  
54  
55  
56  
57  
58  
59  
60

### 13. LIST OF ABBREVIATIONS

AD: Alzheimer's Disease

ADAS-Cog: Alzheimer's Disease Assessment Scale-Cognitive

ADCS-ADL: Alzheimer Disease Cooperative Study Activities of Daily Living

ADNI: Alzheimer's Disease Neuroimaging Initiative

ADRD: Alzheimer's Disease and Related Dementia

AE: Aerobic exercise

ANCOVA: Analysis of Covariance

A $\beta$ : amyloid- $\beta$

BAT: Balance and Toning

BDNF: Brain-Derived Neurotrophic Factor

BHSP: Brain Health Support Program

BNT: Boston Naming Test

CCNA: Canadian Consortium in Neurodegeneration and Aging

CDR: Clinical Dementia Rating

CFC 2: Cognitive Functional Composite

CI: Cognitively Intact

COMPASS-ND: The Comprehensive Assessment of Neurodegeneration and Dementia

CV: Coefficient of Variation

1 FACETS: Functional Assessment of Currently Employed Technology Scale  
2  
3  
4 GAD 7: Generalized Anxiety Disorder 7  
5  
6  
7 GDS-30: Geriatric Depression Scale  
8  
9  
10 IADL: Instrumental Activities of Daily Living  
11  
12  
13 ICH-GCP: International Conference on Harmonization Good Clinical Practice  
14  
15  
16 ITT: Intention-To-Treat  
17  
18  
19 LSQ: Life Space Questionnaire  
20  
21  
22 MCI: Mild Cognitive Impairment  
23  
24  
25 MDA-14: Mediterranean Diet Assessment 14-items  
26  
27  
28 MoCA: Montreal Cognitive Assessment  
29  
30  
31 NTB: Neuropsychological Test Battery  
32  
33  
34 PASE: Physical Activity Scale for the Elderly  
35  
36  
37 PSQI-18: Pittsburgh Sleep Quality Index 18-items  
38  
39  
40 PPA: Per-Protocol Analysis  
41  
42  
43 RT: Resistance training  
44  
45  
46 SCI: Subjective Cognitive Impairment  
47  
48  
49 SF-36: Short Form quality of life questionnaire  
50  
51  
52 SPSS: The Statistical Package for the Social Sciences  
53  
54  
55 STOFHLA: Short Test of Functional Health Literacy  
56  
57



1 STST: One Minute Sit to Stand Test  
2

3  
4 SYNERGIC: SYNchronizing Exercises, Remedies in Galt and Cognition  
5

6  
7 TCOGS: Telephone Cognitive Screening  
8

9  
10 TMT: Trail-Making Test  
11

12  
13 VBM: Voxel-Based Morphometry  
14

15  
16 VEGF: Vascular Endothelial Growth Factor  
17

18  
19 VRF = Vascular Risk Factors  
20

21  
22 WMHs: White Matter Hyper-intensities  
23  
24  
25  
26  
27

## 28 14. DECLARATIONS

29  
30  
31 This study is conducted in compliance with International Conference on Harmonization  
32 Good Clinical Practice (ICH-GCP) and all applicable regulatory and ethical  
33 requirements. All authors and research staff have no declarations, financial or  
34 otherwise, to disclose.  
35  
36  
37  
38  
39  
40  
41  
42  
43  
44

## 45 15. APPENDICES

### 46 APPENDIX A: INTERVENTION PREFERENCE QUESTIONNAIRE

47 Participant ID # \_\_\_\_\_  
48

49 Date (dd-mm-yyyy) \_\_\_\_\_  
50  
51

- 52  
53 1. Given what you know *at this point in time*, please indicate how interested you are  
54 in each of the following interventions, by placing a mark along the line between  
55 no interest and strong interest.  
56  
57

1 Rate your level of interest in **physical exercise** as a way to improve your brain health

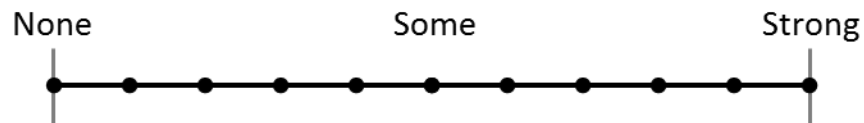

8 Rate your level of interest in **brain exercise** as a way to improve your brain health

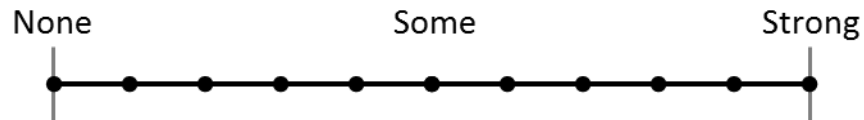

- 14 2. Please rate your preference between physical exercise and brain exercise  
15 training. Select the response below that best describes your preference at this  
16 point in time.

- 17  
18  
19  
20  
21  
22  
23  
24
- Strong preference for **physical exercise**
  - Slight preference for **physical exercise**
  - No preference
  - Slight preference for **brain exercise**
  - Strong preference for **brain exercise**

- 25 3. If you have selected that you prefer one of the interventions over the other,  
26 please indicate *why* you prefer it. If you have an equal preference, then you may  
27 skip this question.

28  
29  
30  
31  
32  
33

- 34 4. Are there other interventions (besides physical exercise and cognitive training)  
35 that you would prefer? If so, please describe them below:

36  
37  
38  
39  
40  
41

- 42 5. Please indicate if you have any additional comments pertaining to the  
43 interventions in this study below:

44  
45  
46  
47  
48  
49

1  
2  
3  
4  
5  
6  
7  
8  
9  
10  
11  
12  
13  
14  
15  
16  
17  
18  
19  
20  
21  
22  
23  
24  
25  
26  
27  
28  
29  
30  
31  
32  
33  
34  
35  
36  
37  
38  
39  
40  
41  
42  
43  
44  
45  
46  
47  
48  
49  
50  
51  
52  
53  
54  
55  
56  
57  
58  
59  
60

For peer review only

## APPENDIX B: MATERIALS GIVEN TO PARTICIPANTS

The following items will be given to participants.

1. An ActiGraph GT9X Activity Monitor
2. A blood pressure cuff and monitor
3. A set of colourful exercise resistance bands for individuals in the AE+RT exercise condition.
4. An exercise mat for individuals in the BAT exercise condition.
5. A standard roll of measuring tape
6. A saliva kit

**APPENDIX C: RECRUITMENT PLAN AND MATERIALS**

| <b>SYNERGIC@Home RECRUITMENT PLAN</b>                                                                               |                                                                                                                                                                                                                                                                                                                                                                                                                                                        |
|---------------------------------------------------------------------------------------------------------------------|--------------------------------------------------------------------------------------------------------------------------------------------------------------------------------------------------------------------------------------------------------------------------------------------------------------------------------------------------------------------------------------------------------------------------------------------------------|
| <b>Target Organization / Group / Provider / Platform</b>                                                            | <b>Methods</b>                                                                                                                                                                                                                                                                                                                                                                                                                                         |
| <b>NB-PALM website</b>                                                                                              | <ul style="list-style-type: none"> <li>Promote SYNERGIC@Home study through email synergic@unb.ca</li> </ul>                                                                                                                                                                                                                                                                                                                                            |
| <b>Horizon Health Research Registry Patient Database</b>                                                            | <ul style="list-style-type: none"> <li>Identify potential research participants who have joined the Research Registry and have volunteered to be included in brain health related studies.</li> </ul>                                                                                                                                                                                                                                                  |
| <b>Social Media</b>                                                                                                 | <ul style="list-style-type: none"> <li>Materials will be specifically developed with messages appropriate for posting on Facebook and other platforms popular with community dwelling older adults</li> </ul>                                                                                                                                                                                                                                          |
| <b>Senior Goodwill Ambassador Program</b><br><b>Go Ahead Seniors/Aînés en Marche</b>                                | <ul style="list-style-type: none"> <li>Trained community volunteers who promote exercise and healthy living throughout NB</li> <li>Email and flyers will be provided to the volunteer leaders of these programs for distribution to participants</li> </ul>                                                                                                                                                                                            |
| <b>Provincial Anglophone and Francophone Seniors' Organizations</b><br><b>Seniors and Healthy Aging Secretariat</b> | <ul style="list-style-type: none"> <li>Email and flyers to numerous seniors' organizations for posting on website and / or distribution to members</li> <li>Association francophone des aîné(e)s du Nouveau-Brunswick</li> <li>NB Senior Citizen's Federation</li> <li>Association des universités du 3e âge du Nouveau-Brunswick T</li> </ul>                                                                                                         |
| <b>NB Alzheimer's Society</b>                                                                                       | <ul style="list-style-type: none"> <li>Distribute flyer to facilitators/ coordinators of care giver and patient support groups</li> <li>Post flyer on website</li> <li>Possible e-blast using generic email</li> </ul>                                                                                                                                                                                                                                 |
| <b>Senior Centres</b>                                                                                               | <ul style="list-style-type: none"> <li>Distribute flyer for posting</li> <li>Have centre distribute if membership list is available</li> <li>Seniors' Information Centre – Moncton</li> <li>Seniors' Resource Centre – Saint John</li> <li>Stepping Stone Senior Centre - Fredericton</li> <li>Johnston Avenue Senior Centre – Fredericton</li> <li>Université de troisième Age Nord Ouest</li> <li>Third Age Centre, St. Thomas University</li> </ul> |

| <b>SYNERGIC@Home RECRUITMENT PLAN</b>                                            |                                                                                                                                                                                                                                                                                                                                                                                                                         |
|----------------------------------------------------------------------------------|-------------------------------------------------------------------------------------------------------------------------------------------------------------------------------------------------------------------------------------------------------------------------------------------------------------------------------------------------------------------------------------------------------------------------|
| <b>Target Organization /<br/>Group / Provider /<br/>Platform</b>                 | <b>Methods</b>                                                                                                                                                                                                                                                                                                                                                                                                          |
| <b>Targeted Provincial<br/>Special<br/>Interest/Membership<br/>Organizations</b> | <ul style="list-style-type: none"> <li>• Use list from Seniors and Healthy Aging Secretariat to distribute flyers, email</li> <li>• Distribute flyer for publication in seniors' newsletters, website</li> <li>• NB Society of Retired Teachers</li> <li>• Société des Enseignantes et des Enseignants Retraités Francophones du Nouveau-Brunswick</li> <li>• Email to UNB, U du M. Mt A alumni associations</li> </ul> |
| <b>Geriatric Clinics</b>                                                         | <ul style="list-style-type: none"> <li>• Provide Information Sheet to Geriatricians</li> <li>• Distribute flyer for posting</li> </ul>                                                                                                                                                                                                                                                                                  |
| <b>Primary Care<br/>Physician/Providers</b>                                      | <ul style="list-style-type: none"> <li>• Provide Information Sheet for physicians and NPs</li> <li>• Distribute flyer for posting in office locations</li> </ul>                                                                                                                                                                                                                                                        |
| <b>Community Health<br/>Centres and Community<br/>Mental Health Centres</b>      | <ul style="list-style-type: none"> <li>• Distribute flyer for posting</li> </ul>                                                                                                                                                                                                                                                                                                                                        |
| <b>Community Developers</b>                                                      | <ul style="list-style-type: none"> <li>• Community Developers to distribute generic email, flyers to networks and organizations they work with</li> </ul>                                                                                                                                                                                                                                                               |
| <b>Print media</b>                                                               | <ul style="list-style-type: none"> <li>• Newspaper advertisements in Fredericton, Moncton, Saint John</li> <li>• Advertise in selected rural papers</li> </ul>                                                                                                                                                                                                                                                          |
| <b>Community-based<br/>businesses</b>                                            | <ul style="list-style-type: none"> <li>• Flyers in selected physical locations where community dwelling older adults congregate i.e., libraries, recreation centres</li> </ul>                                                                                                                                                                                                                                          |

# RECRUITMENT FLYER (Image Based)

60-90 years old?

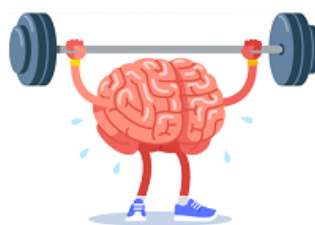

# NB-PALM

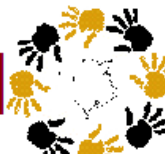

## SYNERGIC@Home

Research Study

Want to exercise your body and brain in the comfort of your own home?

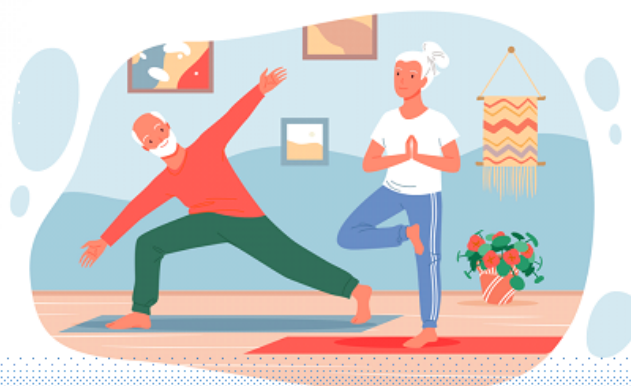

Have access to the Internet at your home?

### 12-month Commitment

- 4-months of body and brain exercise, 3 times a week
- 6 assessment sessions

### Contact Information:

Website: [www.nbpalm.ca](http://www.nbpalm.ca)  
 Email: [synergic@unb.ca](mailto:synergic@unb.ca)  
 Phone: (506) 453-5137

Offered in English and French!

New Brunswick's brain health initiative: Preventing Alzheimer's by Lessening Modifiable risks

Research Ethics Boards: UNB: #2020-168; UdeM: #2021-049; HHN: #2020-2954; VHN

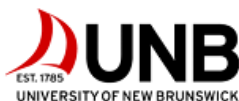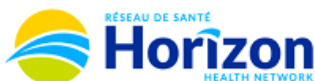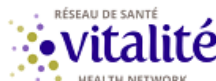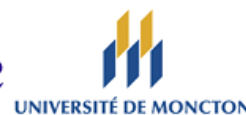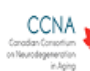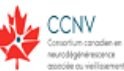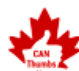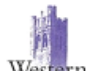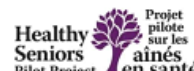

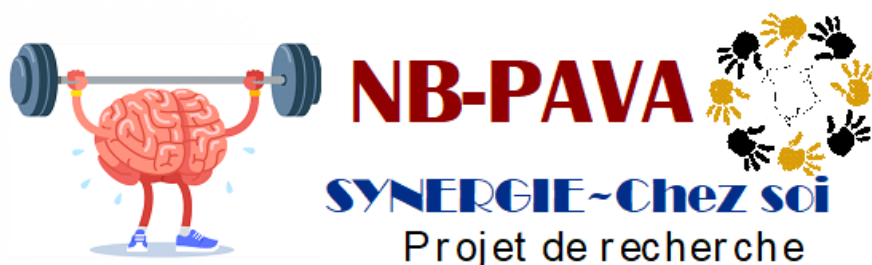

Vous avez entre  
60 et 90 ans ?

Vous voulez entraîner  
votre corps et votre  
cerveau dans le confort  
de votre maison ou  
résidence ?

Vous avez accès à  
l'internet chez vous ?

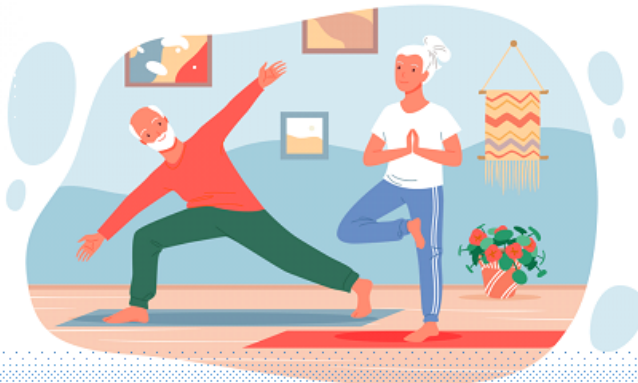

Participation de 12 mois

Informations :

- 4 mois d'exercices pour le corps et le cerveau, 3 fois par semaine
- 6 séances d'évaluation

Site web : [www.nbpalm.ca](http://www.nbpalm.ca)

Courriel : [synergic@unb.ca](mailto:synergic@unb.ca)

Téléphone : (506) 453-5137

Offert en français  
et en anglais

Cerveaux en santé du **Nouveau-Brunswick**: Prévenir l'Alzheimer en Vivant Autrement

Comités d'éthique de la recherche : UNB #2020-168, UdeM #2021-049, HHN #2020-2954, VHN

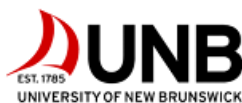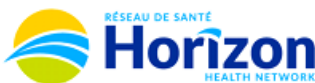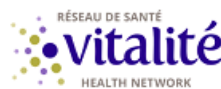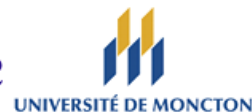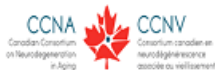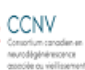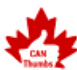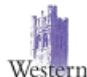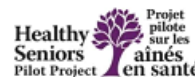



Version 8.0, Feb 20<sup>th</sup>, 2022

# SYNERGIC@Home

**SYN**chronizing Exercises,  
**R**emedies in **G**ait and **C**ognition at **H**ome: Feasibility of a home- based  
 double-blind randomized controlled trial to improve gait and cognition in  
 individuals at risk for dementia

**SYNERGIC@Home is a research project assessing if it is possible to virtually deliver a home-based physical exercise and cognitive training program to older adults in New Brunswick. The hope is that this intervention will have a positive impact on memory for those at risk of developing dementia.**

## RESEARCH STUDY INVESTIGATORS

### Dr. Chris A. McGibbon, PhD

Faculty of Kinesiology and Institute of  
 Biomedical Engineering,  
 University of New Brunswick, New  
 Brunswick, Canada

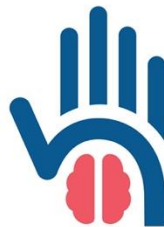

## NB-PALM

Preventing Alzheimer's  
 by Lessening Modifiable risks

### Dr. Pamela Jarrett, MD FRCPC FACP

Department of Geriatric Medicine,  
 Horizon Health Network,  
 Dalhousie Medicine New Brunswick,  
 Saint John, New Brunswick Canada

### Dr. Grant Handrigan, PhD

School of Kinesiology and Recreation, Faculty of Health Sciences and Community Services, Université de Moncton, New Brunswick, Canada

### Dr. Ludivine Witkowski, MD

Department of Neuroscience, Dr. Georges-L.-Dumont University Hospital Centre, Moncton, New Brunswick, Canada

### Dr. Manuel Montero-Odasso, MD, PhD, FRCPC

Schulich School of Medicine & Dentistry, London, Ontario, Canada;  
 Departments of Medicine (Geriatrics) and of Epidemiology and Biostatistics,  
 University of Western Ontario, London, Ontario, Canada

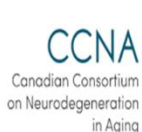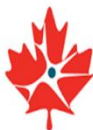

CCNV  
 Consortium canadien en  
 neurodégénérescence  
 associée au vieillissement

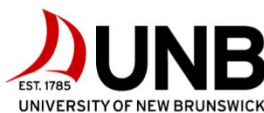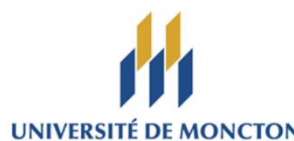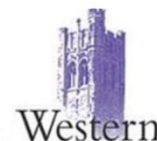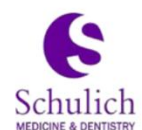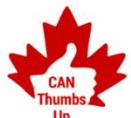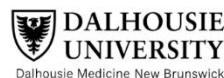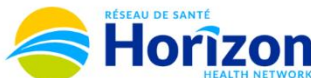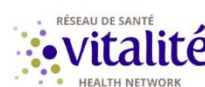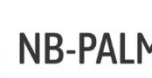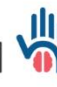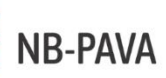

## INTRODUCTION AND BACKGROUND

Page 106 of 147

Version 8.0, Feb 20<sup>th</sup>, 2022

A study called SYNERGIC taking place in Canada, is showing promising results that exercise and cognitive training can be beneficial for older adults who are experiencing early problems with their memory. This study—**SYNERGIC@Home**— is an extension of the SYNERGIC trial. This study will engage older adults at risk of developing memory problems in a home-based program that will use an online virtual platform called Zoom.

This study is also part of the *New Brunswick Brain Health Initiative: Preventing Alzheimer's through Lifestyle Modification* (NB-PALM), funded by the HealthySeniors Pilot Projects, Public Health Agency of Canada, Province of New Brunswick.

## POPULATION UNDER STUDY

We are looking for interested older adults living in New Brunswick who are at risk for developing dementia between the age of 60 and 90 years.

You may be eligible to participate if you have:

1. **No Memory Problems** but have two or more of the following risk factors:

- Overweight
- Hypertension/High blood pressure
- Diabetes
- Cardiovascular disease
- Physical inactivity
- First-degree family history of dementia (parents, children, siblings)
- High cholesterol
- Poor sleep
- Poor diet

2. Been diagnosed by a physician or nurse practitioner as having **Subjective Cognitive Impairment** or **Mild Cognitive Impairment**.

## DESCRIPTION OF STUDY

This study will take place over 10 months and includes an initial general health questionnaire, memory tests, and mobility assessments. Assessments will occur before the start of the physical exercise and cognitive training, immediately after the training intervention and again at 10 months follow-up. The training intervention will take place over 4 months. The physical exercise and cognitive training sessions will be done virtually over a computer or tablet with a research assistant who is a personal trainer, 3 times per week. Each session will take about 90 minutes.

You are encouraged to have someone close to you who can assist you during the study, but this is not mandatory for everyone.

**IF YOU HAVE FURTHER QUESTIONS REGARDING PARTICIPATION OR ARE INTERESTED IN HEARING MORE ABOUT THIS PLEASE CONTACT:**

**Research Coordinator**

Alana Gullison

Phone: 1 (506) 453-5137

email: synergic@unb.ca

**Research Assistant**

Molly Gallibois

Phone: 1 (506) 447-3197

email: synergic@unb.ca

Version 8.0, Feb 20<sup>th</sup>, 2022

## RECRUITMENT FLYER

### RECRUITING PARTICIPANTS FOR ONLINE EXERCISE AND MEMORY STUDY TO TAKE PLACE IN YOUR OWN HOME!

Researchers at the University of New Brunswick, Université de Moncton, Horizon Health Network, and Vitalité Health Network are inviting you to participate in *SYNERGIC@Home*, a study about the role of exercise and cognitive training in delaying the onset of dementia and Alzheimer's disease.

#### WHO?

We want to hear from community dwelling older adults living in Anglophone and Francophone communities throughout New Brunswick who may be otherwise healthy, but feel their memory is worsening or have received a medical diagnosis of Mild Cognitive Impairment. If you are between the ages of 60 and 90 years, and meet the following criteria please contact us at [synergicinfo@nb-palm.ca](mailto:synergicinfo@nb-palm.ca)

- Have access to a computer in your home that is connected to high-speed Internet,
- Capable of sending and receiving emails,
- Can read/write/speak in either English or French, and
- Able to walk 10 meters (about 32 feet) independently, with/without a walking aid.
- Have a spouse, relative, or close friend interested in being a study care partner (an exception will be made if a study partner cannot be found)

#### WHERE?

*Research activities* usually done in an exercise lab or hospital setting, will be completed in your own home. This study will help us learn how practical it is to conduct research using video-conferencing to train participants and collect data. Participants' activity and sleep patterns will be monitored using a wrist-watch like device called an activity monitor.

#### WHAT?

Participants will be enrolled for a total of 10 months. You will be assigned an exercise and cognitive training program delivered in 3 – 90 minute sessions per week over 16 weeks. Sessions consist of both prescribed cognitive training and exercises. A research assistant trained in exercise science will guide participants through the exercises.

Version 8.0, Feb 20<sup>th</sup>, 2022

1  
2  
3 Questionnaires and assessments will be completed at various time points such as: screening for  
4 enrollment, baseline, and two follow-up sessions. Your medical history and cognitive functioning  
5 will be assessed and information collected about your lifestyle habits (e.g., how much exercise  
6 and physical activity you do, how well you sleep, your diet, and mental health)  
7  
8  
9  
10  
11

**STUDY CONTACT INFORMATION:**

Synergic@Home Study Research Coordinator

email: synergic@unb.ca

Version 8.0, Feb 20<sup>th</sup>, 2022

# Initial Recruitment Email

## PROCEDURE:

Following REB approval, this email along the flyer will be sent to organizations that post on their website and do an eblast to members and others including:

- Seniors organizations to include on website and newsletters
- Senior Ambassadors through Healthy Aging and Seniors Secretariat
- Community developers with HHN and VHN

**Email Subject Line:** Take part in a new virtual study called **SYNERGIC@Home!**

## Email Content:

## **NB PARTICIPANTS WANTED FOR AN ONLINE EXERCISE AND MEMORY STUDY IN YOUR OWN HOME!**

You are invited to take part in *SYNERGIC@Home* – a research project studying how exercise and cognitive training may delay the onset of dementia and Alzheimer's disease. We want to hear from community dwelling older adults living in Anglophone and Francophone communities throughout New Brunswick who may be otherwise healthy, but feel their memory is worsening or they have a medical diagnosis of Mild Cognitive Impairment. If you are between the ages of 60 and 90 years and meet the following criteria, we would like to hear from you:

- Have access to a computer in your home that is connected to the high-speed Internet,
- Capable of sending and receiving emails,
- Can read/write/speak in either English or French, and
- Able to walk 10 meters (about 32 feet) independently, with or without a walking aid.
- Have a spouse, relative, or close friend interested in being a study care partner (an exception will be made if a study partner cannot be found)

You are **INELIGIBLE** for our study if you have received a medical diagnosis of dementia or Alzheimer's disease by your family or specialist physician.

Version 8.0, Feb 20<sup>th</sup>, 2022

1  
2  
3 Promising Canadian research has shown that older adults who are at risk can benefit  
4 from participating in physical exercise and cognitive training. *We want to learn if* study  
5 activities usually done in an exercise laboratory setting can be virtually completed in a  
6 participant's home. We also want to find out how practical it is to collect data from  
7 participants' about their activity levels and sleep patterns using a wrist-watch like device  
8 called an activity monitor.  
9

10  
11  
12 For further information, please email: synergicinfo@nb-palm.ca  
13

14  
15  
16  
17 *SYNERGIC@Home is conducted by researchers at University of New Brunswick,*  
18 *Université de Moncton, Horizon and Vitalité Health Networks as well the University of*  
19 *Western Ontario. It is part of the project New Brunswick Brain Health Initiative:*  
20 *Preventing Alzheimer's through Lifestyle Modification NB-PALM, which is funded by the*  
21 *Healthy Seniors Pilot Project (NB government) and the Canadian Consortium of*  
22 *Neurodegeneration on Aging. We are always looking for additional participants. If you*  
23 *think someone you know may be interested in taking part in this SYNERGIC@Home,*  
24 *please forward them this email.*  
25  
26  
27  
28  
29  
30

31  
32 Thank you for your interest!  
33

34  
35 Synergic@Home Study Research Coordinator  
36

37  
38 Email: synergic@unb.ca  
39  
40  
41  
42  
43  
44  
45  
46  
47  
48  
49  
50  
51  
52  
53  
54  
55  
56  
57

Version 8.0, Feb 20<sup>th</sup>, 2022

# Recruitment Newspaper Advertisement

## Recruitment Newspaper Advertisement Content as follows:

SYNERGIC@Home Newspaper Advertisement

### Procedure

- To advertise in selected NB newspapers assuming budget is available; i.e., Telegraph Journal (Saint John, Fredericton, Moncton issues)
- To advertise in selected rural newspapers assuming budget availability.

## RECRUITING PARTICIPANTS FOR AN ONLINE EXERCISE AND MEMORY STUDY IN YOUR OWN HOME!

Feeling as if your memory is worsening?

Have you received a medical diagnosis of Mild Cognitive Impairment?

If so, you may be eligible to be a participant in

**SYNERGIC@Home**

A home-based virtual exercise and cognitive training research study for community living older adults residing in Anglophone and Francophone communities at risk of developing dementia and Alzheimer's Disease

For more information contact us at [synergic@unb.ca](mailto:synergic@unb.ca)

## Follow-up Email

Dear\*\*\*\*

I am a Study Research Coordinator with the SYNERGIC@Home study. I understand that you are interested in learning about our study.

I have enclosed a copy of the consent forms that provides detailed information on this project including the requirements of your participation.

I will follow up with you in a few weeks to see if you might be interested in participating.

In the meantime, if you have any questions, please email or call me as per the information below.

Thank you for your interest!

Synergic@Home Study Research Coordinator

Email: synergic@unb.ca



Version 8.0, Feb 20<sup>th</sup>, 2022

# Study Information for Physicians / Providers

We are inviting you to discuss the following opportunity with your patients.

## *SYNERGIC@Home*

**An online exercise and cognitive training program taking place in the participant's own home**

### *What is the Synergic@Home study?*

*SYNERGIC@Home*, is a provincial study taking place throughout New Brunswick and will involve 64 participants from rural and urban locations who will “virtually” participate.

The study goals are twofold. The first is to learn about the role of exercise and cognitive training in preventing or delaying the onset of dementia and Alzheimer's disease; while the second goal is to find out how practical it is to conduct this research in a participant's home.

By participating in this study your patients will be making a valuable contribution about how to conduct research in a home environment that previously was conducted in hospital and university settings.

### *What is expected of participants?*

*Study participants must meet detailed inclusion and exclusion criteria which will be provide to you. A brief overview is as follows:*

- Have access to a home computer that is connected to the high-speed Internet
- Capable of sending and receiving emails,
- Can read/write/speak in either English or French
- Able to walk 10 meters (about 32 feet) independently, with or without a walking aid
- Have a spouse, relative, or close friend interested in being a study care partner (an exception will be made if a study partner cannot be found)

*Study participants will be randomly assigned to one of four exercise and cognitive training groups and asked to participate via Zoom. as outlined below:*

Version 8.0, Feb 20<sup>th</sup>, 2022

The following table contains details of the study procedures /activities that you may wish to share/discuss with your patient.

| <b>Details of Research Study Assessments and Intervention</b> |                                                        |                                                                                                                                                                                                                                                                                                                                                                                                                                                                                                  |
|---------------------------------------------------------------|--------------------------------------------------------|--------------------------------------------------------------------------------------------------------------------------------------------------------------------------------------------------------------------------------------------------------------------------------------------------------------------------------------------------------------------------------------------------------------------------------------------------------------------------------------------------|
| <b>Participant Activities</b>                                 | <b>When does this happen? How long will this take?</b> | <b>Description</b>                                                                                                                                                                                                                                                                                                                                                                                                                                                                               |
| Consent & Clinical / Cognitive Screening                      | At consent: 2 hours                                    | <p>Screening is what you take part in to see if you are eligible to enter our study. The study team will review the Informed Consent Form with you to answer your questions about the study. After you sign the consent, the study team will ask questions about your:</p> <ul style="list-style-type: none"> <li>▪ Personal and demographic information</li> <li>▪ Health, family medical history, medications</li> </ul> <p>The study team will also test your memory and thinking skills.</p> |
| Mobility & Lifestyle Screening                                | After giving your consent: 2 hours                     | You will be asked to questions about your lifestyle, physical activity, sleep patterns, and diet. You will be asked to perform tests to assess your walking speed and mobility. The study team will assist via you in taking measurements such blood pressure and waist size.                                                                                                                                                                                                                    |
| Physician & Participant Conference                            | After giving your consent: 1 hour                      | You will meet with a research physician who will review your medical history and discuss any specific concerns or questions related to your eligibility for participation in our study.                                                                                                                                                                                                                                                                                                          |
| Activity Monitoring                                           | Before the intervention begins: 10 days                | You will wear an activity monitoring device similar to a wristwatch for 24 hours each day. This device records information about your activities and hours of sleep. This equipment will be sent to you via a secure courier and you will return it to the study team at the end of the 10 days.                                                                                                                                                                                                 |
| Activity Assessment                                           | Before the intervention begins: 2 hours                | You will be asked to perform tests to assess your mobility and walking speed.                                                                                                                                                                                                                                                                                                                                                                                                                    |
| Cognitive Assessment                                          | Before the Intervention begins: 2 hours                | The study team will conduct tests to assess your memory, language, attention span, and problem-solving abilities.                                                                                                                                                                                                                                                                                                                                                                                |
| Study Intervention                                            | After you are enrolled: 96 hours                       | The research team will assign to a study group. You will follow exercise and cognitive training programs via Zoom for 2 hours per day, 3 times                                                                                                                                                                                                                                                                                                                                                   |

Version 8.0, Feb 20<sup>th</sup>, 2022

| <b>Details of Research Study Assessments and Intervention</b> |                                                        |                                                                                                                                                                                                                                                               |
|---------------------------------------------------------------|--------------------------------------------------------|---------------------------------------------------------------------------------------------------------------------------------------------------------------------------------------------------------------------------------------------------------------|
| <b>Participant Activities</b>                                 | <b>When does this happen? How long will this take?</b> | <b>Description</b>                                                                                                                                                                                                                                            |
|                                                               |                                                        | per week for 16 weeks. A research assistant will be present during each of the exercise sessions.                                                                                                                                                             |
| Activity Monitoring                                           | After completing the intervention: 10 days             | About four months after you began your exercise and cognitive training program, you will once again wear an activity monitoring device for a period of 10 days. This equipment will be sent to you via a secure courier and you will return it after 10 days. |
| Activity Assessment                                           | After completing the intervention:<br><br>2 hours      | You will be asked to perform tests to assess your mobility and walking speed.                                                                                                                                                                                 |
| Cognitive Assessment                                          | After completing the intervention: 2 hours             | The study team will conduct tests to assess your memory, language, attention span, and problem-solving abilities.                                                                                                                                             |
| Activity Monitoring                                           | 10 months after beginning the study: 10 days           | For the final time, you will wear an activity monitoring device. Equipment will be provided as before and you will return it after 10 days.                                                                                                                   |
| Activity Assessment                                           | 10 months after beginning the study: 2 hours           | You will be asked to perform tests to assess your mobility and walking speed.                                                                                                                                                                                 |
| Cognitive Assessment                                          | 10 months after beginning the study: 2 hours           | The study team will perform tests to assess your memory, language, attention span, and problem-solving abilities.                                                                                                                                             |
| Semi-structured interview                                     | 10 months after beginning the study: 30-45 minutes     | A member of the study team will arrange a time for you to be interviewed via Zoom. You will be asked questions about your experience as a study participant.                                                                                                  |

If you have questions about this study or would like to send along a referral, please contact the Synergic@Home Study Research Coordinator.

Email: synergic@unb.ca

# Recruitment Discussion Guide for Obtaining Consent

## PROCEDURE

- Following REB approval, this discussion guide will be used by the Research Coordinators at HHN and VHN to review the consent form with the prospective participant and obtain consent.

## INTRODUCTION

Hi my name is [*insert name*]. I am a Research coordinator with [*insert name*] which is one of our study sites.

I'm calling about the research study called Synergic@Home. I understand that you contacted us to say you were interested in becoming a participant. You indicated you saw the flyer in [*insert if this information is known*]. The reason I am calling is to discuss the study and proceed with obtaining your consent to participate in our study if you are ready to make that decision today.

Before we start, I'd like to [*confirm or obtain*] some basic personal information.

**Name of Potential Study Participant:**

\_\_\_\_\_

**Email:** \_\_\_\_\_

**Phone number:** \_\_\_\_\_

**Home address:** \_\_\_\_\_

**Age:** \_\_\_\_\_

Version 8.0, Feb 20<sup>th</sup>, 2022

1  
2  
3 Next, I'd like to carefully go over different sections of our form to make sure you  
4 understand what's involved and your role as a study participant.  
5  
6

7  
8 So if you're okay to start, let's begin.  
9

10 Did you receive the consent form that we recently mailed to you or sent via email?  
11

- 12  
13
- 14 • You did receive it – that's terrific.
- 15

16 Have you had an opportunity to read through it in detail?  
17

- 18  
19
- 20 • You did – that's wonderful.
- 21

22 As you were reading through it, did you make notes by any sections or sentences that  
23 you want to discuss with me? Or that you want me to explain or clarify?  
24

25 RESPONSE 1:  
26

- 27  
28
- 29 • The form was very informative and I am ready to sign it.
- 30

31 If that's the case, then before we sign it, I'd like to go over some particular sections of  
32 the form. It's my role to make sure that you fully understand and are informed about  
33 your rights as a study participant.  
34  
35

36 RESPONSE 2:  
37

- 38  
39
- 40 • Answer the specific questions.
- 41

42 Then move on to reviewing the sections of the form that were not addressed by the  
43 questions. "It's my role to make sure that you fully understand and are informed about  
44 your rights as a study participant. I noticed that there are some sections of the form that  
45 you didn't have any questions about, so before we sign it, I'd like to go over some  
46 particular sections of the form".  
47  
48  
49  
50

51  
52  
53  
54  
55 **BEGIN TO REVIEW THE SPECIFIC SECTIONS OF THE CONSENT FORM**  
56

1  
2  
3 Let's start with you answering a FEW KEY QUESTIONS and then we'll walk through  
4 other sections of the consent. Here's the first question:  
5  
6

7  
8 Have you discussed your participation with your any family members, friends or your  
9 family physician?  
10

- 11
- 12 • Yes or no
- 13

14 Do you understand that your participation in Synergic @ Home is your decision?  
15

- 16
- 17 • Yes or no
- 18

19 Are you aware that your participation in Synergic @ Home is entirely voluntary?  
20

- 21
- 22 • Yes or no
- 23

24 I want to stress that you can withdraw from the study at any time  
25

- 26
- 27 • Understood or not
- 28

29  
30 Finally, will you be having a study care partner? A study care partner is a spouse or  
31 family member or friend who will be asked information about your health behaviors at  
32 various time as well as provide you with support and encouragement throughout the  
33 study.  
34  
35

- 36
- 37
- 38 • Yes – I have a study partner.
  - 39 ○ Who is going to be your study partner?
  - 40 ○ What is their relationship?
  - 41 ○ I will need contact information as this person will also need to sign a
  - 42 consent form.
- 43 • No study partner.
- 44
- 45

#### 46 **RESEARCH PURPOSE AND BACKGROUND:**

47

48  
49 Do you have any questions about why we are doing this study?  
50

- 51
- 52 • Yes - no
- 53
- 54
- 55
- 56
- 57

Version 8.0, Feb 20<sup>th</sup>, 2022

1  
2  
3 We are pleased to be offering the SYNERGIC@Home feasibility trial to NB residents.  
4 We are used to doing this research in a laboratory setting at a university or health  
5 center. So, since we can no longer bring people in during the pandemic, we decided to  
6 conduct a study about exercise and cognitive training in a participant's home using  
7 video-conferencing. Your participation will help us learn about the practicalities of doing  
8 this type of research remotely.  
9

## 14 **STUDY PROCEDURES**

15  
16  
17 The consent describes the study activities in various sections. When you become a  
18 participant, you will be enrolled in an exercise and cognitive training program that you  
19 take part in for three sessions each week over 16 weeks. Each of these weekly  
20 sessions will consist of both cognitive training and exercises and will last about an hour  
21 and one-half. During each of these sessions a research coordinator who is trained in  
22 exercise science will guide you through your program.  
23  
24  
25  
26  
27

28  
29 Do you have any questions about the amount of time needed to participate each week?  
30

31  
32 As a participant in our study there are numerous questionnaires you will be asked to  
33 complete along with assessments that research coordinators such as myself will be  
34 conducting with you [and your study partner].  
35  
36  
37

38  
39 Now as you saw in the different sections describing the study activities, there are  
40 various times during the study when we will collect information from you [and your study  
41 partner if available]. This is when we will ask you questions about your medical history  
42 as well as assess your cognitive functioning. We do this by asking you questions that  
43 test your memory and thinking skills. We also use questionnaires that ask your lifestyle  
44 habits such as how much exercise and physical activity you do, how well you sleep,  
45 your diet as well your mental health.  
46  
47  
48  
49

50  
51  
52  
53  
54 Any questions about the assessments and questionnaires?  
55  
56  
57

Version 8.0, Feb 20<sup>th</sup>, 2022

1  
2  
3 In order to complete the study exercise activities you will need some equipment which  
4 we will send to your home for you to use throughout the study. Some examples are an  
5 activity monitor, exercise mat, blood pressure cuff, and so on. If you are familiar with a  
6 Fitbit – this is what the activity monitor looks like and you wear it like a wristwatch such  
7 as shown in the picture. It records information about your activity and sleep levels and  
8 you will return this to us at various times throughout the study. We will also get you to  
9 take your blood pressure and certain other measurements.  
10  
11  
12  
13  
14  
15

16 I imagine this is a lot of information to take in, however there will always be someone  
17 guiding you on the video-conference while you are using this equipment. Some of the  
18 equipment you will be able to keep, while others like the activity monitor and blood  
19 pressure cuff you will return at the end of the study.  
20  
21  
22  
23

24 Do you have any questions about the equipment?  
25  
26

27 You may be wondering about our sanitation procedures. Each time after you return the  
28 equipment, it will be thoroughly cleaned and sanitized prior to mailing it back to you.  
29  
30  
31

32 We will also be sending you a manual that will contain easy to read instructions about  
33 various aspects of the study. And remember that someone will always be available by  
34 phone, video-conference, or email if you have any questions.  
35  
36  
37

38 It's important for you to understand that before you can become a participant, we will  
39 need to collect information during a screening visit that will help us determine if you  
40 meet the study eligibility criteria. Do you have any questions about this aspect?  
41  
42  
43  
44

45 It will no doubt be me that will meet with you [and your study partner] to complete this  
46 assessment. There may also be another nurse who has a background in research who  
47 will interview you. Between the two of us, we will gather information to help us decide  
48 about your suitability for our study.  
49  
50  
51

## 52 **RISKS AND DISCOMFORTS**

53  
54  
55  
56  
57



Version 8.0, Feb 20<sup>th</sup>, 2022

1  
2  
3 Do you have any questions about the section in the form that described the risks and  
4 discomforts?  
5  
6

7  
8 As I previously mentioned, we will be giving your cognitive training tests and exercises  
9 to do three times a week. And, depending on how much exercise you are used to  
10 doing, you may experience some discomfort while you are performing the exercises. If  
11 you do, you can stop at any time. And our research coordinator will be watching you as  
12 you exercise. S/he will ask you to stop if you are experiencing shortness of breath,  
13 chest pain, dizziness, or unsteadiness.  
14  
15  
16  
17

18  
19 During the cognitive training part of each session you may experience some frustration  
20 as you complete the tasks. Also, you may feel a bit of discomfort if you are not used to  
21 wearing a wrist watch but hopefully that won't happen!  
22  
23  
24

25  
26 Finally, you know that we have various questions and assessments that will take some  
27 time to complete. We know this can be frustrating for some people. And we know from  
28 our experience that some questions may trigger an unpleasant memory or distressing  
29 feelings. We will watch closely for your reactions and will suggest taking a break. And  
30 as always, you can ask to take a break at any time.  
31  
32  
33  
34

35 We are not aware of any side effects from wearing the activity monitor.  
36  
37

38 I also want to stress that it's your right to stop your participation in the study at any time  
39 and there is no judgement or penalty if you decide to do so. Also you don't need to give  
40 a written note notifying your withdrawal. Okay?  
41  
42  
43  
44

## 45 **COST/BENEFIT**

46

47 There is no direct cost for you to participate. We will provide everything you need except  
48 of course your computer or laptop and the internet connection.  
49  
50

51  
52 In relation to benefits, so far some of our participants have mentioned they are pleased  
53 to be taking part in a NB study that will help researchers learn more about how to do  
54 this type of research in a participant's own home.  
55  
56  
57

1  
2  
3 Are there any questions about this section?  
4  
5

## 6 **PRIVACY AND CONFIDENTIALITY**

7

8  
9 The section on privacy and confidentiality is quite detailed.  
10

11  
12 Do you have any questions about the procedures we described about how your  
13 personal information including your name, email, phone number, address, medical  
14 conditions and so on will be protected and kept private throughout the study?  
15

- 16 • If yes, answer the questions.....  
17

18  
19 I know we also described numerous ways about how your personal research data will  
20 be stored. Do you have any concerns about the information that is included in this  
21 section of the form?  
22

- 23 • If yes, answer the questions.  
24

25  
26 Now if you're ready, I'm going to ask if you would like to participate in this study?  
27

- 28 • If no - thank you very much for your time.  
29
- 30 • If yes – let's proceed to the section of the form where I need to obtain your  
31 consent.  
32

33  
34 Direction: Proceed to review the different sections where you need to obtain consent.  
35 I.e., get initials in each box or sentence pertaining to the various study components.  
36

37  
38 After finalizing the consent form, provide directions as to how to return the form.  
39

- 40 • If returned by email they will need to scan the original and email it to you.  
41
- 42 • If returned by mail, the research coordinator will need to make a copy which is  
43 then returned by email or mail to the participant.  
44

45  
46 Now before I finish our call, I'd like to get the contact information for your study partner  
47 [if one is participating]  
48  
49  
50  
51

Version 8.0, Feb 20<sup>th</sup>, 2022**Name of Potential Study Partner:**  
\_\_\_\_\_**Email:** \_\_\_\_\_**Phone number:** \_\_\_\_\_**Home address:** \_\_\_\_\_

Thank you for taking the time to review the form and agreeing to participate. I will be in touch with you to confirm a time when we will conduct the screening assessment. In the meantime, you have my contact information [provide email and phone number]. If you have any questions don't hesitate to be in touch. Good bye for now.

## APPENDIX D: EXIT QUESTIONNAIRE

## SYNERGIC@Home Exit Questionnaire

| Rate how much you agree or disagree with each statement                              | Strongly Disagree     | Disagree              | Neutral               | Agree                 | Strongly Agree        |
|--------------------------------------------------------------------------------------|-----------------------|-----------------------|-----------------------|-----------------------|-----------------------|
| 1. Zoom was easy to use in completing my exercise program.                           | <input type="radio"/> |
| 2. Wearing the activity monitor was not a problem for me.                            | <input type="radio"/> |
| 3. I did not like using my own computer/laptop to participate.                       | <input type="radio"/> |
| 4. I did not like having a research assistant supervise my exercises.                | <input type="radio"/> |
| 5. Taking part in the program 3 days per week was the right amount of time for me.   | <input type="radio"/> |
| 6. Exercising in my own home was convenient.                                         | <input type="radio"/> |
| 7. I encountered many problems with my internet connection.                          | <input type="radio"/> |
| 8. The research assistant was helpful in assisting me to complete my exercises.      | <input type="radio"/> |
| 9. I was frustrated because the exercises were too difficult to complete in my home. | <input type="radio"/> |
| 10. I did not enjoy completing the assessments and testing on Zoom.                  | <input type="radio"/> |
| 11. Each week I looked forward to my cognitive training program.                     | <input type="radio"/> |
| 12. Participating took too much time away from my other activities.                  | <input type="radio"/> |

Version 8.0, Feb 20<sup>th</sup>, 2022

1  
2  
3  
4  
5  
6  
7  
8  
9  
10  
11  
12  
13  
14  
15  
16  
17  
18  
19  
20  
21  
22  
23  
24  
25  
26  
27  
28  
29  
30  
31  
32  
33  
34  
35  
36  
37  
38  
39  
40  
41  
42  
43  
44  
45  
46  
47  
48  
49  
50  
51  
52  
53  
54  
55  
56  
57  
58  
59  
60

13. Wearing the activity monitor interfered with my sleep and other activities.

14. I was able to form a positive relationship with the research assistant.

15. I would have preferred exercising with a group of my peers.

16. I felt anxious when I was asked questions that tested my memory.

17. I enjoyed doing the cognitive exercises.

18. I would have preferred having one of my peers or someone who is my age assist with my exercises.

19. There were 4 intervention groups participating in the SYNERGIC@Home research study. Of the four groups listed below, which one do you think you were assigned to?

- Active exercises and active cognitive training
- Active exercises and limited cognitive training
- Limited exercises and active cognitive training
- Limited exercises and limited cognitive training

20. We are interested in hearing about what motivated you to complete the interventions. Please describe the factors or reasons that influenced your decision.

---

---

---

---

---

## APPENDIX E: SEMI-STRUCTURED INTERVIEW GUIDE

| Semi-Structured Interview Guide                         |                                                                                                                                                                                                                                                                                                                                                                                                                                                            |
|---------------------------------------------------------|------------------------------------------------------------------------------------------------------------------------------------------------------------------------------------------------------------------------------------------------------------------------------------------------------------------------------------------------------------------------------------------------------------------------------------------------------------|
| Dimension                                               | Questions                                                                                                                                                                                                                                                                                                                                                                                                                                                  |
| <b>Reaction to Participation in Research Study</b>      | <p><b>Overarching Questions:</b></p> <p>How satisfied were you with the study?</p> <p>How was the support you received during the study?</p> <p><b>Probing Questions:</b></p> <p>What was your experience:</p> <ul style="list-style-type: none"> <li>▪ Doing this study over the Internet?</li> <li>▪ With the equipment you used?</li> </ul> <p>What are your thoughts about the assessments that took place?</p> <p>How can this study be improved?</p> |
| <b>Learning That Occurred During the Research Study</b> | <p><b>Overarching Questions:</b></p> <p>What knowledge or information about exercise did you learn from your participation?</p> <p>What did you learn from your involvement with cognitive training?</p> <p><b>Probing Questions:</b></p>                                                                                                                                                                                                                  |

Version 8.0, Feb 20<sup>th</sup>, 2022

| <b>Semi-Structured Interview Guide</b>                                                                                                  |                                                                                                                                                                                                                                            |
|-----------------------------------------------------------------------------------------------------------------------------------------|--------------------------------------------------------------------------------------------------------------------------------------------------------------------------------------------------------------------------------------------|
|                                                                                                                                         | <p>Were there any areas that you had to “unlearn”? For example, did you find out that you had been doing exercises inappropriately?</p> <p>Have you identified any differences in your memory or concentration?</p>                        |
| <b>Behaviour Changes That Occurred During the Research Study</b>                                                                        | <p><b>Overarching Questions:</b></p> <p>Have you modified your behaviour as a result of participating in the study? If yes, what are they?</p> <p>Can you identify any motivators that helped you to change or modify your behaviours?</p> |
| <b>Results Identified by the Participants</b>                                                                                           | <p><b>Overarching Questions</b></p> <p>What have been the greatest results for you?</p>                                                                                                                                                    |
| <b>Concluding Questions / Comments</b>                                                                                                  |                                                                                                                                                                                                                                            |
| <p>Is there anything that has not been asked that needs to be brought forward?</p> <p>Are there any comments you would like to add?</p> |                                                                                                                                                                                                                                            |

1  
2  
3  
4  
5  
6  
7  
8  
9  
10  
11  
12  
13  
14  
15  
16  
17  
18  
19  
20  
21  
22  
23  
24  
25  
26  
27  
28  
29  
30  
31  
32  
33  
34  
35  
36  
37  
38  
39  
40  
41  
42  
43  
44  
45  
46  
47  
48  
49  
50  
51  
52  
53  
54  
55  
56  
57  
58  
59  
60

**APPENDIX F: CASE REPORT FORMS**

For peer review only



Version 8.0, Feb 20<sup>th</sup>, 2022

## APPENDIX G BUDGET SUMMARY

**Budget Summary for Synergic@Home Study**

|                              |                                                                                                          |
|------------------------------|----------------------------------------------------------------------------------------------------------|
| <b>Funding Source:</b>       | Health Seniors Pilot Project (HSPP)                                                                      |
| <b>Project Title:</b>        | The New Brunswick Brain Health Initiative: Preventing Alzheimer's by Lessening Modifiable risk (NB-PALM) |
| <b>Project Award Amount:</b> | \$2.69M                                                                                                  |
| <b>Study Title:</b>          | SYNERGIC@Home/SYNERGIE~Chez soi                                                                          |
| <b>Study Budget Amount:</b>  | \$559,049.69                                                                                             |

| <b>Synergic@Home<br/>Study Budget</b>      | <b>Study Budget<br/>Nov 2020 to end Oct 2022</b> |
|--------------------------------------------|--------------------------------------------------|
| <b>A) Personnel (include 20% benefits)</b> |                                                  |
| HHN Clinical Research Coordinator          | \$ 149,760.00                                    |
| VHN Clinical Research Coordinator          | \$ 140,400.00                                    |
| UNB Study Research Coordinator             | \$ 112,589.28                                    |
| (4) Intervention Research Assistants       | \$ 119,172.41                                    |
| <b>Subtotal</b>                            | <b>\$ 521,921.69</b>                             |
| <b>B) Evaluation</b>                       |                                                  |
| Community Consultations                    |                                                  |
| Focus Groups                               |                                                  |
| Surveys                                    |                                                  |
| Venues                                     | \$ -                                             |
| Software                                   |                                                  |
| <b>Subtotal</b>                            | <b>\$ -</b>                                      |
| <b>C) Travel</b>                           |                                                  |
| Transportation                             |                                                  |
| Accommodation                              |                                                  |
| Meals and Incidentals                      |                                                  |
| Meeting Space                              | \$ -                                             |
| <b>Subtotal</b>                            | <b>\$ -</b>                                      |
| <b>D) Materials</b>                        |                                                  |
| Office Supplies                            |                                                  |

Version 8.0, Feb 20<sup>th</sup>, 2022

|                                  |           |                   |
|----------------------------------|-----------|-------------------|
| Project Materials                |           |                   |
| Printing                         | \$        | 1,000.00          |
| Postage                          | \$        | 1,000.00          |
| Other                            | \$        | -                 |
| <b>Subtotal</b>                  | <b>\$</b> | <b>2,000.00</b>   |
| <b>E) Equipment</b>              |           |                   |
| Office Equipment                 | \$        | 1,000.00          |
| Computer                         | \$        | 10,500.00         |
| Furniture                        | \$        | 1,000.00          |
| Special Equipment                | \$        | 22,628.00         |
| Other                            |           |                   |
| <b>Subtotal</b>                  | <b>\$</b> | <b>35,128.00</b>  |
| <b>F) Rent and Utilities</b>     |           |                   |
| Rent                             | \$        | -                 |
| Utilities                        | \$        | -                 |
| <b>Subtotal</b>                  | <b>\$</b> | <b>-</b>          |
| <b>G) Other (specify)</b>        |           |                   |
| Training                         | \$        | -                 |
| Translation/ Interpretation Fees | \$        | -                 |
| Membership Fees                  | \$        | -                 |
| <b>Subtotal</b>                  | <b>\$</b> | <b>-</b>          |
| <b>Total Cost</b>                |           |                   |
| <b>Total Budget</b>              | <b>\$</b> | <b>559,049.69</b> |

APPENDIX H: NEUROPEAK DUAL TASK SOFTWARE - SAMPLES

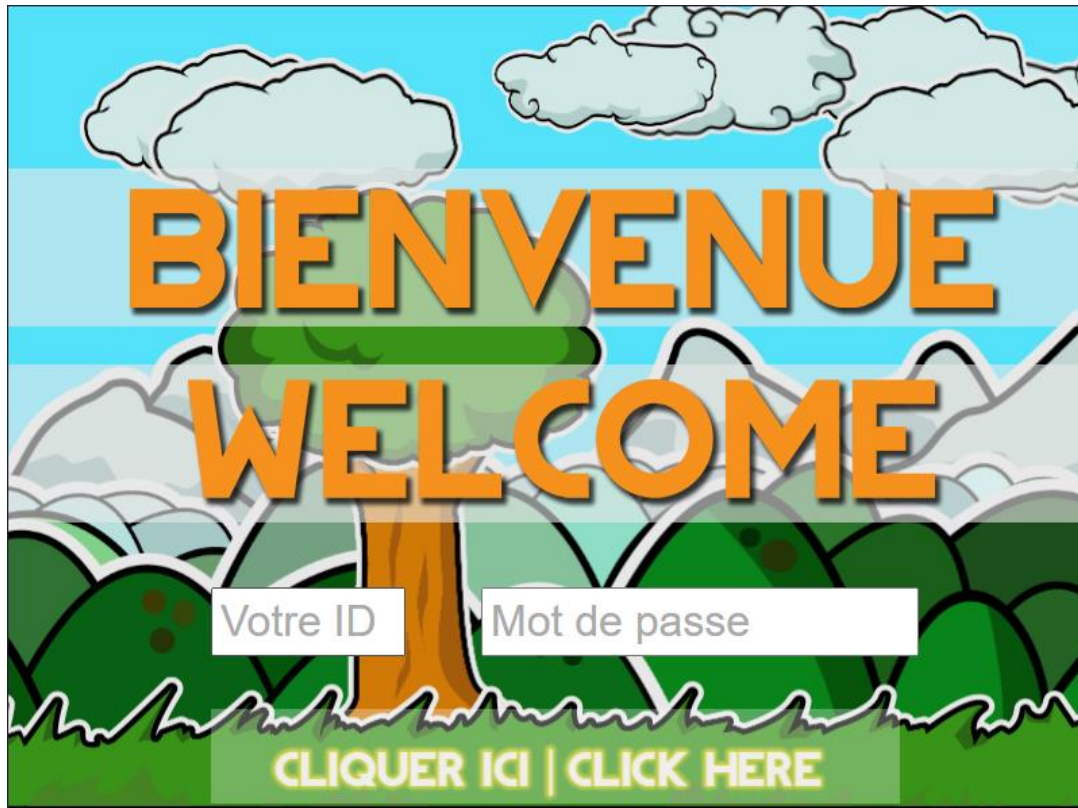

**HELLO PARTICIPANT 999!**

Are you ready for a new training session?  
 For any comments or questions, do not hesitate to contact us by clicking [here](#).

You have reached training session #3. Keep up the good work!

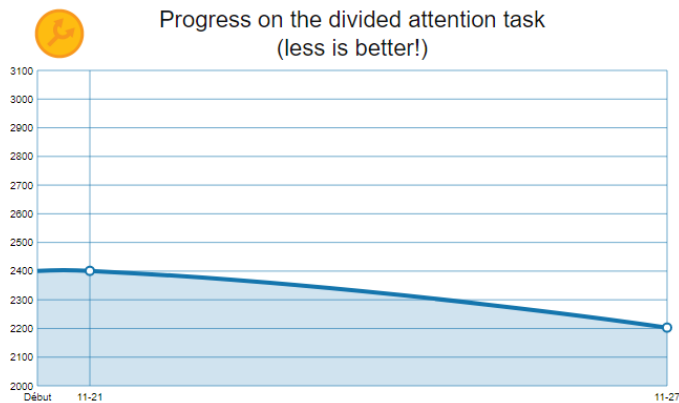

 **CONTINUE**

1  
2  
3  
4  
5  
6  
7  
8  
9  
10  
11  
12  
13  
14  
15  
16  
17  
18  
19  
20  
21  
22  
23  
24  
25  
26  
27  
28  
29  
30  
31  
32  
33  
34  
35  
36  
37  
38  
39  
40  
41  
42  
43  
44  
45  
46  
47  
48  
49  
50  
51  
52  
53  
54  
55  
56  
57  
58  
59  
60

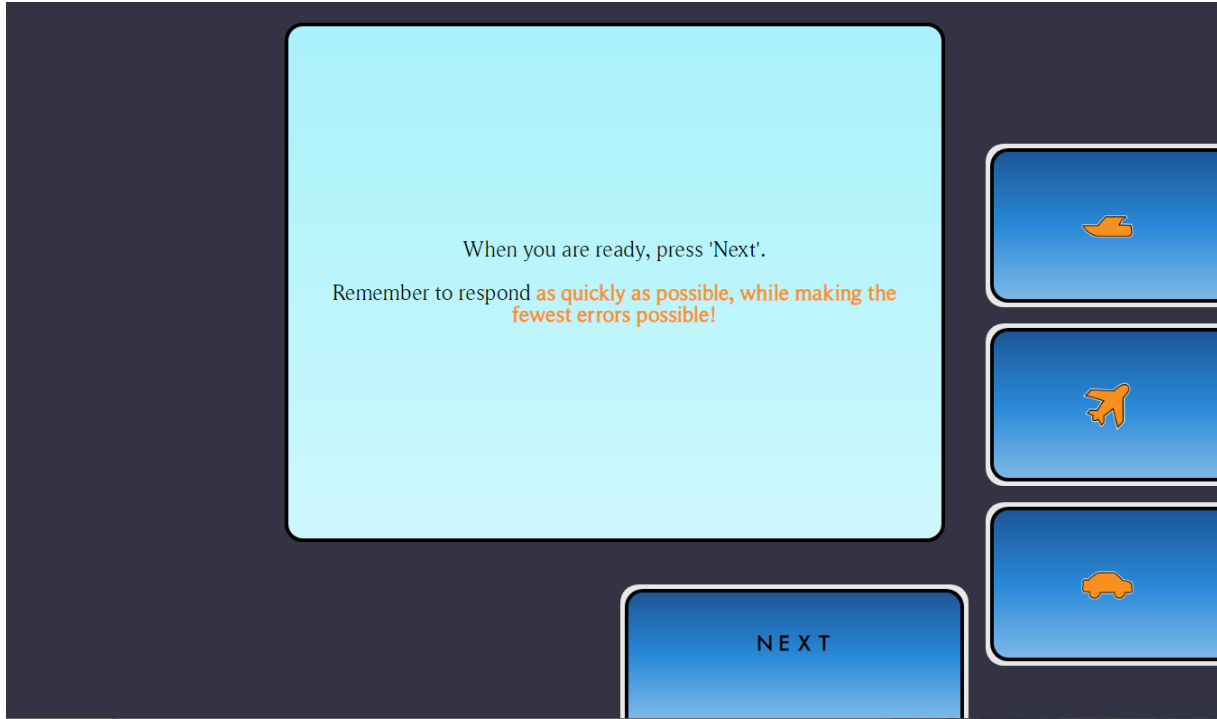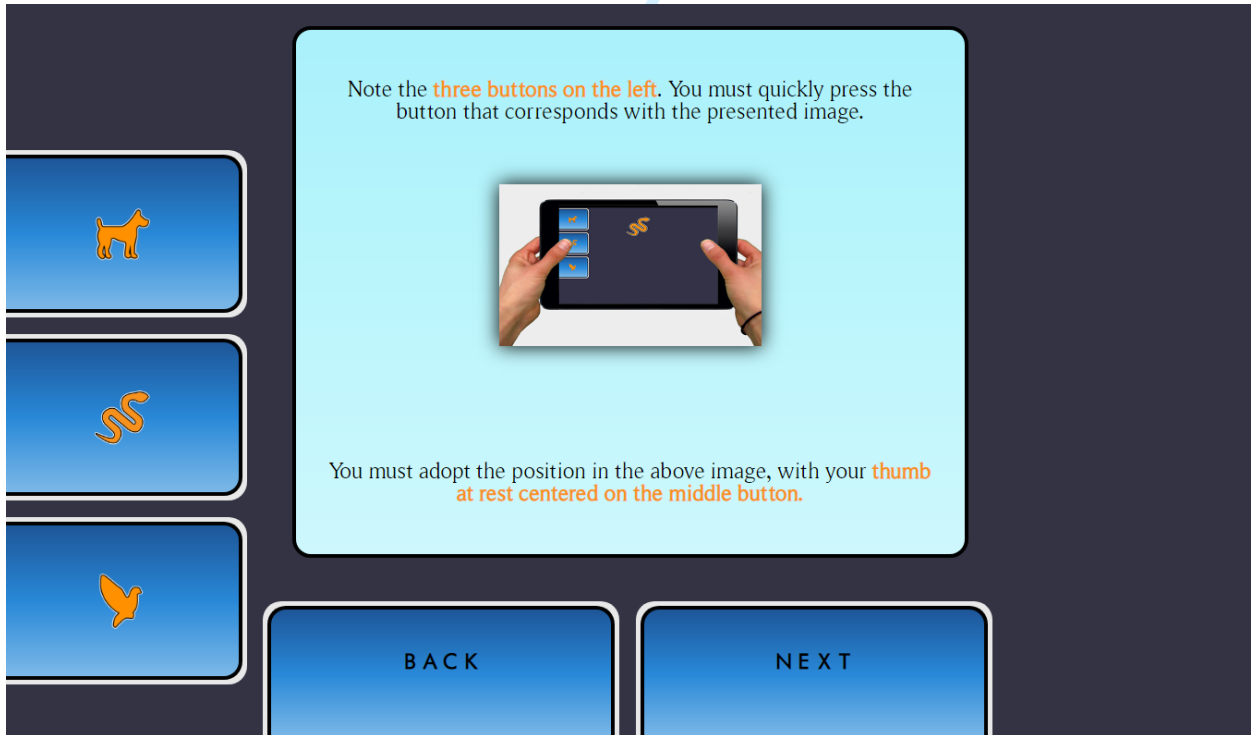

Version 8.0, Feb 20<sup>th</sup>, 2022

1  
2  
3  
4  
5  
6  
7  
8  
9  
10  
11  
12  
13  
14  
15  
16  
17  
18  
19  
20  
21  
22  
23  
24  
25  
26  
27  
28  
29  
30  
31  
32  
33  
34  
35  
36  
37  
38  
39  
40  
41  
42  
43  
44  
45  
46  
47  
48  
49  
50  
51  
52  
53  
54  
55  
56  
57  
58  
59  
60

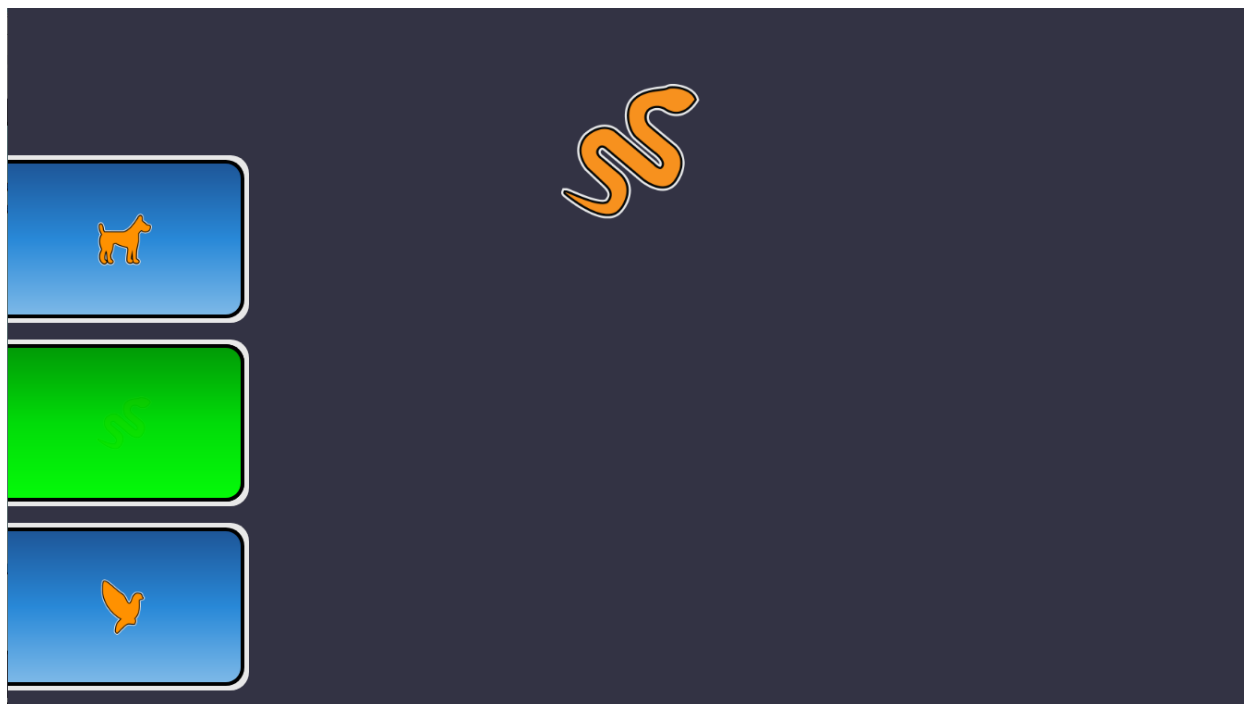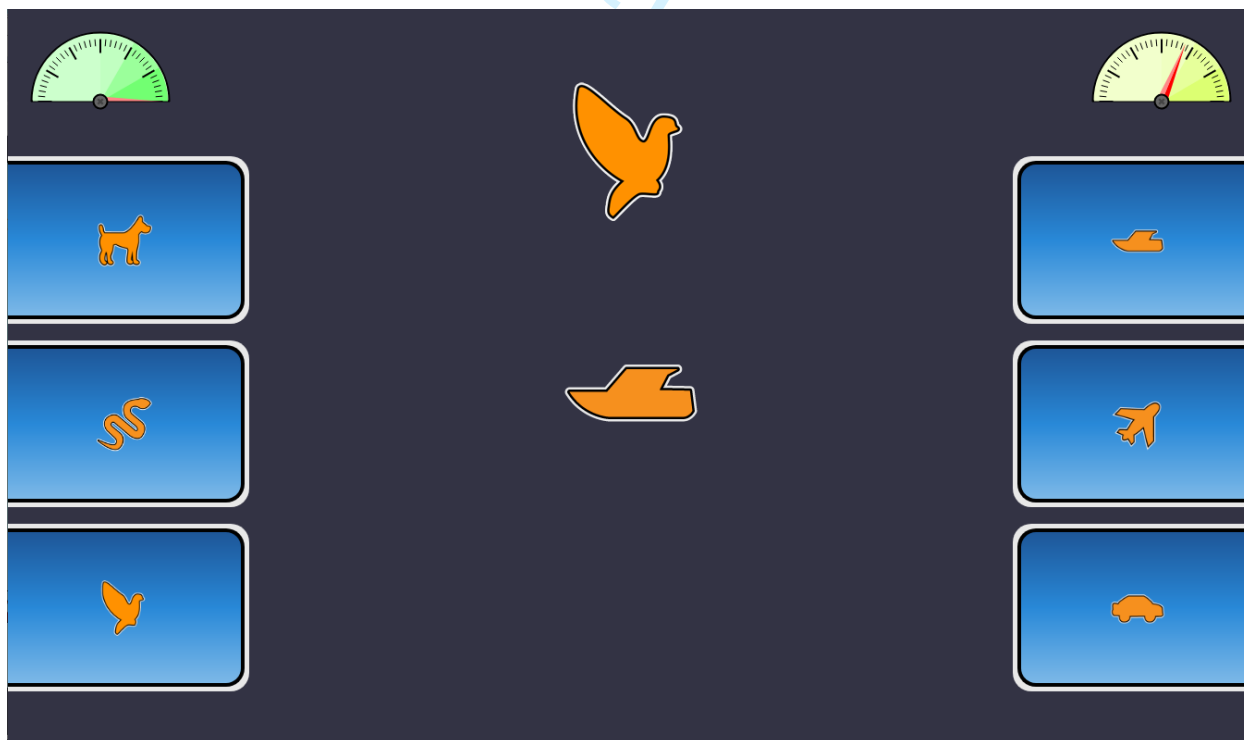



**\*DEVIATION CATEGORIES:**

- A. Safety
- B. Informed Consent
- C. Eligibility
- D. Protocol implementation
- E. Other, specify in log

\*\*DEVIATION CODES: Numbers listed by the sample protocol deviations

Safety (Category A)

1. Not reporting an SAE within 24 hours
2. Laboratory tests not done
3. AE/SAE is not reported to REB
4. Other, specify in log

Informed Consent (Category B)

10. Failure to obtain informed consent
11. Consent form used was not current REB-approved version
12. Consent form does not include updates or information required by REB
13. Consent form missing

14. Consent form not signed and dated by participant
15. Consent form does not contain all required signatures
16. Other, specify in log

Eligibility (Category C)

20. Participant did not meet eligibility criterion
21. Randomization of an ineligible participant
22. Participant randomized prior to completing Baseline Assessment, etc.
23. Randomization and/or treatment of participant prior to REB approval of protocol
24. Other, specify in log

Protocol implementation (Category D)

30. Failure to keep REB approval up to date
31. Participant receives wrong treatment
32. Participant seen outside visit window
33. Use of unallowable concomitant treatments
34. Prescribed dosing outside protocol guidelines
35. Missed assessment
36. Missed visit
37. Other, specify in log

# Protocol Deviation Form (Descriptive)

1  
2  
3  
4  
5  
6  
7  
8  
9  
10  
11  
12  
13  
14  
15  
16  
17  
18  
19  
20  
21  
22  
23  
24  
25  
26  
27  
28  
29  
30  
31  
32  
33  
34  
35  
36  
37  
38  
39  
40  
41  
42  
43  
44  
45  
46  
47  
48  
49  
50  
51  
52  
53  
54  
55  
56  
57  
58  
59  
60

|                                                                                                                 |  |              |                |
|-----------------------------------------------------------------------------------------------------------------|--|--------------|----------------|
| <b>Subject ID:</b>                                                                                              |  | <b>Date:</b> | mm / dd / yyyy |
| <b>Description of Protocol Deviation:</b>                                                                       |  |              |                |
| <p style="color: lightblue; font-size: 48px; opacity: 0.5; transform: rotate(-30deg);">For peer review only</p> |  |              |                |
| <b>This form completed by:</b>                                                                                  |  |              |                |

Version: 8.0 Feb 20<sup>th</sup>, 2022

Page 137 of 147



**Study Title:** SYNERGIC@Home

1  
2  
3  
4  
5  
6  
7  
8  
9  
10  
11  
12  
13  
14  
15  
16  
17  
18  
19  
20  
21  
22  
23  
24  
25  
26  
27  
28  
29  
30  
31  
32  
33  
34  
35  
36  
37  
38  
39  
40  
41  
42  
43  
44  
45  
46  
47  
48  
49  
50  
51  
52  
53  
54  
55  
56  
57  
58  
59  
60

|  |  |
|--|--|
|  |  |
|--|--|

For peer review only

Version: 8.0 Feb 20<sup>th</sup>, 2022

Page 138 of 147

## 16. REFERENCES

1. International AD. The Global Impact of Dementia: An analysis of prevalence, incidence, cost and trends. *The World Alzheimer Report 2015*. 2016.
2. The Comprehensive Assessment of Neurodegeneration and Dementia (COMPASS-ND) Study. <https://ccna-ccnv.ca/compass-nd-study/>. Published 2020. Accessed.
3. Lawton MP, Brody EM. Assessment of older people: self-maintaining and instrumental activities of daily living. *Gerontologist*. 1969;9(3):179-186.
4. Kurt S. Kirkpatrick Model: Four Levels of Learning Evaluation. *Educational Technology*. 2014.
5. Jutten RJ, Harrison J, Lee Meeuw Kjoer PR, et al. A novel cognitive-functional composite measure to detect changes in early Alzheimer's disease: Test-retest reliability and feasibility. *Alzheimers Dement (Amst)*. 2018;10:153-160.
6. Raghavan N, Samtani MN, Farnum M, et al. The ADAS-Cog revisited: novel composite scales based on ADAS-Cog to improve efficiency in MCI and early AD trials. *Alzheimers Dement*. 2013;9(1 Suppl):S21-31.
7. Fiatarone Singh MA, Gates N, Saigal N, et al. The Study of Mental and Resistance Training (SMART) study-resistance training and/or cognitive training in mild cognitive impairment: a randomized, double-blind, double-sham controlled trial. *J Am Med Dir Assoc*. 2014;15(12):873-880.
8. Suzuki T, Shimada H, Makizako H, et al. A randomized controlled trial of multicomponent exercise in older adults with mild cognitive impairment. *PLoS One*. 2013;8(4):e61483.
9. Yoshida K, Yamaoka Y, Eguchi Y, et al. Remote neuropsychological assessment of elderly Japanese population using the Alzheimer's Disease Assessment Scale: A validation study. *J Telemed Telecare*. 2020;26(7-8):482-487.
10. Ricker JH, Axelrod BN. Analysis of an Oral Paradigm for the Trail Making Test. *Assessment*. 1994;1(1):47-52.
11. Mack WJ, Freed DM, Williams BW, Henderson VW. Boston Naming Test: shortened versions for use in Alzheimer's disease. *J Gerontol*. 1992;47(3):P154-158.
12. Abikoff H, Alvir J, Hong G, et al. Logical memory subtest of the Wechsler Memory Scale: age and education norms and alternate-form reliability of two scoring systems. *J Clin Exp Neuropsychol*. 1987;9(4):435-448.
13. Delis DC, Kramer JH, Kaplan E, Holdnack J. Reliability and validity of the Delis-Kaplan Executive Function System: an update. *J Int Neuropsychol Soc*. 2004;10(2):301-303.

Version: 8.0 Feb 20<sup>th</sup>, 2022

Page 139 of 147

**Study Title: SYNERGIC@Home**

14. Rapp SR, Legault C, Espeland MA, et al. Validation of a cognitive assessment battery administered over the telephone. *J Am Geriatr Soc*. 2012;60(9):1616-1623.
15. Berrigan LI, Fisk JD, Walker LA, et al. Reliability of regression-based normative data for the oral symbol digit modalities test: an evaluation of demographic influences, construct validity, and impairment classification rates in multiple sclerosis samples. *Clin Neuropsychol*. 2014;28(2):281-299.
16. **Unpublished.**
17. Group SMIfSR, Williamson JD, Pajewski NM, et al. Effect of Intensive vs Standard Blood Pressure Control on Probable Dementia: A Randomized Clinical Trial. *JAMA*. 2019;321(6):553-561.
18. Livingston G, Sommerlad A, Orgeta V, et al. Dementia prevention, intervention, and care. *Lancet*. 2017;390(10113):2673-2734.
19. Yu JT, Xu W, Tan CC, et al. Evidence-based prevention of Alzheimer's disease: systematic review and meta-analysis of 243 observational prospective studies and 153 randomised controlled trials. *J Neurol Neurosurg Psychiatry*. 2020.
20. Livingston G, Huntley J, Sommerlad A, et al. Dementia prevention, intervention, and care: 2020 report of the Lancet Commission. *Lancet*. 2020;396(10248):413-446.
21. Montero-Odasso M, Ismail Z, Livingston G. One third of dementia cases can be prevented within the next 25 years by tackling risk factors. The case "for" and "against". *Alzheimers Res Ther*. 2020;12(1):81.
22. Montero-Odasso M, Almeida QJ, Burhan AM, et al. SYNERGIC TRIAL (SYNchronizing Exercises, Remedies in Gait and Cognition) a multi-Centre randomized controlled double blind trial to improve gait and cognition in mild cognitive impairment. *BMC Geriatr*. 2018;18(1):93.
23. M Montero Odasso QA, R Camicioli, K Li, T Liu-Ambrose, L Middleton, and L Bherer. PRELIMINARY RESULTS FROM THE SYNERGIC TRIAL: A MULTIMODAL INTERVENTION FOR MILD COGNITIVE IMPAIRMENT. *Innovation in Aging*. 2018;2(1):439-440.
24. Alzheimer Society of C. Report summary Prevalence and monetary costs of dementia in Canada (2016): a report by the Alzheimer Society of Canada. *Health Promot Chronic Dis Prev Can*. 2016;36(10):231-232.
25. Ostbye T, Crosse E. Net economic costs of dementia in Canada. *CMAJ*. 1994;151(10):1457-1464.
26. Takeda A, Loveman E, Clegg A, et al. A systematic review of the clinical effectiveness of donepezil, rivastigmine and galantamine on cognition, quality of life and adverse events in Alzheimer's disease. *Int J Geriatr Psychiatry*. 2006;21(1):17-28.

Version: 8.0 Feb 20<sup>th</sup>, 2022

Page 140 of 147

- 1
  - 2
  - 3
  - 4
  - 5
  - 6
  - 7
  - 8
  - 9
  - 10
  - 11
  - 12
  - 13
  - 14
  - 15
  - 16
  - 17
  - 18
  - 19
  - 20
  - 21
  - 22
  - 23
  - 24
  - 25
  - 26
  - 27
  - 28
  - 29
  - 30
  - 31
  - 32
  - 33
  - 34
  - 35
  - 36
  - 37
  - 38
  - 39
  - 40
  - 41
  - 42
  - 43
  - 44
  - 45
  - 46
  - 47
  - 48
  - 49
  - 50
  - 51
  - 52
  - 53
  - 54
  - 55
  - 56
  - 57
  - 58
  - 59
  - 60
27. Albert MS, DeKosky ST, Dickson D, et al. The diagnosis of mild cognitive impairment due to Alzheimer's disease: recommendations from the National Institute on Aging-Alzheimer's Association workgroups on diagnostic guidelines for Alzheimer's disease. *Alzheimers Dement*. 2011;7(3):270-279.
28. Petersen RC. Clinical practice. Mild cognitive impairment. *N Engl J Med*. 2011;364(23):2227-2234.
29. Cheng ST, Chow PK, Song YQ, et al. Mental and physical activities delay cognitive decline in older persons with dementia. *Am J Geriatr Psychiatry*. 2014;22(1):63-74.
30. Bherer L, Erickson KI, Liu-Ambrose T. Physical exercise and brain functions in older adults. *J Aging Res*. 2013;2013:197326.
31. Liu-Ambrose T, Nagamatsu LS, Voss MW, Khan KM, Handy TC. Resistance training and functional plasticity of the aging brain: a 12-month randomized controlled trial. *Neurobiol Aging*. 2012;33(8):1690-1698.
32. Ohman H, Savikko N, Strandberg TE, Pitkala KH. Effect of physical exercise on cognitive performance in older adults with mild cognitive impairment or dementia: a systematic review. *Dement Geriatr Cogn Disord*. 2014;38(5-6):347-365.
33. Lautenschlager NT, Cox KL, Flicker L, et al. Effect of physical activity on cognitive function in older adults at risk for Alzheimer disease: a randomized trial. *JAMA*. 2008;300(9):1027-1037.
34. Colcombe S, Kramer AF. Fitness effects on the cognitive function of older adults: a meta-analytic study. *Psychol Sci*. 2003;14(2):125-130.
35. Langlois F, Vu TT, Chasse K, Dupuis G, Kergoat MJ, Bherer L. Benefits of physical exercise training on cognition and quality of life in frail older adults. *J Gerontol B Psychol Sci Soc Sci*. 2013;68(3):400-404.
36. Gates N, Fiatarone Singh MA, Sachdev PS, Valenzuela M. The effect of exercise training on cognitive function in older adults with mild cognitive impairment: a meta-analysis of randomized controlled trials. *Am J Geriatr Psychiatry*. 2013;21(11):1086-1097.
37. Li KZ, Roudaia E, Lussier M, Bherer L, Leroux A, McKinley PA. Benefits of cognitive dual-task training on balance performance in healthy older adults. *J Gerontol A Biol Sci Med Sci*. 2010;65(12):1344-1352.
38. Reijnders J, van Heugten C, van Boxtel M. Cognitive interventions in healthy older adults and people with mild cognitive impairment: a systematic review. *Ageing Res Rev*. 2013;12(1):263-275.

**Study Title: SYNERGIC@Home**

- 1
  - 2
  - 3
  - 4
  - 5
  - 6
  - 7
  - 8
  - 9
  - 10
  - 11
  - 12
  - 13
  - 14
  - 15
  - 16
  - 17
  - 18
  - 19
  - 20
  - 21
  - 22
  - 23
  - 24
  - 25
  - 26
  - 27
  - 28
  - 29
  - 30
  - 31
  - 32
  - 33
  - 34
  - 35
  - 36
  - 37
  - 38
  - 39
  - 40
  - 41
  - 42
  - 43
  - 44
  - 45
  - 46
  - 47
  - 48
  - 49
  - 50
  - 51
  - 52
  - 53
  - 54
  - 55
  - 56
  - 57
  - 58
  - 59
  - 60
39. Ballesteros S, Prieto A, Mayas J, et al. Brain training with non-action video games enhances aspects of cognition in older adults: a randomized controlled trial. *Front Aging Neurosci*. 2014;6:277.
40. Chapman SB, Aslan S, Spence JS, et al. Neural mechanisms of brain plasticity with complex cognitive training in healthy seniors. *Cereb Cortex*. 2015;25(2):396-405.
41. Teixeira CVL, Ribeiro de Rezende TJ, Weiler M, et al. Cognitive and structural cerebral changes in amnesic mild cognitive impairment due to Alzheimer's disease after multicomponent training. *Alzheimers Dement (N Y)*. 2018;4:473-480.
42. Ballesteros S, Voelcker-Rehage C, Bherer L. Editorial: Cognitive and Brain Plasticity Induced by Physical Exercise, Cognitive Training, Video Games, and Combined Interventions. *Front Hum Neurosci*. 2018;12:169.
43. Ngandu T, Lehtisalo J, Solomon A, et al. A 2 year multidomain intervention of diet, exercise, cognitive training, and vascular risk monitoring versus control to prevent cognitive decline in at-risk elderly people (FINGER): a randomised controlled trial. *Lancet*. 2015;385(9984):2255-2263.
44. Lauenroth A, Ioannidis AE, Teichmann B. Influence of combined physical and cognitive training on cognition: a systematic review. *BMC Geriatr*. 2016;16:141.
45. Shah TMM, R.N. Synergistic Effects of Combined Physical Activity and Brain Training on Neurological Functions. In: *Physical Activity and the Aging Brain: Effects of Exercise on Neurological Function*. Academic Press; 2017:175-185.
46. Pothier K, Gagnon C, Fraser SA, et al. A comparison of the impact of physical exercise, cognitive training and combined intervention on spontaneous walking speed in older adults. *Aging Clin Exp Res*. 2018;30(8):921-925.
47. Lipardo DS, Aseron AMC, Kwan MM, Tsang WW. Effect of Exercise and Cognitive Training on Falls and Fall-Related Factors in Older Adults With Mild Cognitive Impairment: A Systematic Review. *Arch Phys Med Rehabil*. 2017;98(10):2079-2096.
48. Gauthier S, Reisberg B, Zaudig M, et al. Mild cognitive impairment. *Lancet*. 2006;367(9518):1262-1270.
49. Tan CH, Bonham LW, Fan CC, et al. Polygenic hazard score, amyloid deposition and Alzheimer's neurodegeneration. *Brain*. 2019;142(2):460-470.
50. Desikan RS, Fan CC, Wang Y, et al. Genetic assessment of age-associated Alzheimer disease risk: Development and validation of a polygenic hazard score. *PLoS Med*. 2017;14(3):e1002258.
51. El-Kotob R, Giangregorio LM. Pilot and feasibility studies in exercise, physical activity, or rehabilitation research. *Pilot Feasibility Stud*. 2018;4:137.

Version: 8.0 Feb 20<sup>th</sup>, 2022

Page 142 of 147

- 1  
2  
3 52. Calculate Your Body Mass Index. National Heart Lung and Blood Institute.  
4 [https://www.nhlbi.nih.gov/health/educational/lose\\_wt/BMI/bmi-m.htm](https://www.nhlbi.nih.gov/health/educational/lose_wt/BMI/bmi-m.htm). Accessed.  
5  
6  
7 53. Get Active Questionnaire. In: (CSEP-PATH®) CSFEPATFH, ed2017.  
8  
9 54. Jessen F, Amariglio RE, van Boxtel M, et al. A conceptual framework for research on subjective  
10 cognitive decline in preclinical Alzheimer's disease. *Alzheimers Dement*. 2014;10(6):844-852.  
11  
12 55. Kurlowicz L, Wallace M. The Mini Mental State Examination (MMSE). *Director*. 1999;7(2):62.  
13  
14 56. Molloy DW, Alemayehu E, Roberts R. Reliability of a Standardized Mini-Mental State  
15 Examination compared with the traditional Mini-Mental State Examination. *Am J Psychiatry*.  
16 1991;148(1):102-105.  
17  
18 57. Newkirk LA, Kim JM, Thompson JM, Tinklenberg JR, Yesavage JA, Taylor JL. Validation of a 26-  
19 point telephone version of the Mini-Mental State Examination. *J Geriatr Psychiatry Neurol*.  
20 2004;17(2):81-87.  
21  
22 58. John KCPS. VIRTUAL APPROACHES TO COGNITIVE SCREENING DURING PANDEMICS. *Canadian*  
23 *Geriatrics Society Journal of CME*. 2020;10(1).  
24  
25 59. Nasreddine ZS, Phillips NA, Bedirian V, et al. The Montreal Cognitive Assessment, MoCA: a brief  
26 screening tool for mild cognitive impairment. *J Am Geriatr Soc*. 2005;53(4):695-699.  
27  
28 60. Chapman JE, Cadilhac DA, Gardner B, Ponsford J, Bhalla R, Stolwyk RJ. Comparing face-to-face  
29 and videoconference completion of the Montreal Cognitive Assessment (MoCA) in community-  
30 based survivors of stroke. *J Telemed Telecare*. 2019:1357633X19890788.  
31  
32 61. Morris JC. The Clinical Dementia Rating (CDR): current version and scoring rules. *Neurology*.  
33 1993;43(11):2412-2414.  
34  
35 62. Esther Strauss EMSS, Otfried Spreen. Trail Making Tests. In: SE SO, ed. *A compendium of*  
36 *Neuropsychological Tests:Administration, norms and commentary*. New York: Oxford University  
37 Press; 1998:533-547.  
38  
39 63. Wechsler D. *Wechsler adult intelligence scale—Fourth Edition (WAIS—IV)*. Vol 22. San Antonio, TX:  
40 NCS Pearson; 2008.  
41  
42 64. Christodoulou G, Gennings C, Hupf J, et al. Telephone based cognitive-behavioral screening for  
43 frontotemporal changes in patients with amyotrophic lateral sclerosis (ALS). *Amyotroph Lateral*  
44 *Scler Frontotemporal Degener*. 2016;17(7-8):482-488.  
45  
46 65. Ryan JJ, Schnakenberg-Ott SD. Scoring reliability on the Wechsler Adult Intelligence Scale-Third  
47 Edition (WAIS-III). *Assessment*. 2003;10(2):151-159.  
48  
49  
50  
51  
52  
53  
54  
55  
56  
57  
58  
59  
60

**Study Title: SYNERGIC@Home**

- 1  
2  
3 66. Buysse DJ, Reynolds CF, 3rd, Monk TH, Berman SR, Kupfer DJ. The Pittsburgh Sleep Quality  
4 Index: a new instrument for psychiatric practice and research. *Psychiatry Res.* 1989;28(2):193-  
5 213.  
6  
7  
8 67. Martinez-Gonzalez MA, Garcia-Arellano A, Toledo E, et al. A 14-item Mediterranean diet  
9 assessment tool and obesity indexes among high-risk subjects: the PREDIMED trial. *PLoS One.*  
10 2012;7(8):e43134.  
11  
12 68. Hedlund L, Brekke HK, Brembeck P, Augustin H. A short questionnaire for assessment of dietary  
13 vitamin D intake. *European Journal of Nutrition and Food Safety.* 2014;4:150-156.  
14  
15  
16 69. Washburn RA, Smith KW, Jette AM, Janney CA. The Physical Activity Scale for the Elderly (PASE):  
17 development and evaluation. *J Clin Epidemiol.* 1993;46(2):153-162.  
18  
19 70. Stalvey B, Owsley, C., Sloane, M.E., Ball, K. The Life Space Questionnaire: A measure of the  
20 extent of mobility of older adults. *Journal of Applied Gerontology.* 1999;18:479-498.  
21  
22 71. Rockwood K, Song X, MacKnight C, et al. A global clinical measure of fitness and frailty in elderly  
23 people. *CMAJ.* 2005;173(5):489-495.  
24  
25  
26 72. Lyons RA, Perry HM, Littlepage BN. Evidence for the validity of the Short-form 36 Questionnaire  
27 (SF-36) in an elderly population. *Age Ageing.* 1994;23(3):182-184.  
28  
29 73. Spitzer RL, Kroenke K, Williams JB, Lowe B. A brief measure for assessing generalized anxiety  
30 disorder: the GAD-7. *Arch Intern Med.* 2006;166(10):1092-1097.  
31  
32  
33 74. Yesavage JA, Brink TL, Rose TL, et al. Development and validation of a geriatric depression  
34 screening scale: a preliminary report. *J Psychiatr Res.* 1982;17(1):37-49.  
35  
36 75. National Alzheimer's Coordinating Center. COVID-19 Impact Survey: Retrieved from  
37 <https://www.alz.washington.edu/>. June, 2020.  
38  
39  
40 76. Lepkowsky C, & Arndt, S. Functional assessment of currently employed technology scale  
41 (FACETS): Reliability and validity. *Int J Med Sci Clin Invest.* 2018;5(09):4064-4068.  
42  
43 78. Charles M. Lepkowsky SA. Functional Assessment of Currently Employed Technology Scale  
44 (FACETS) 4.0: Update on a Brief Intake Instrument to Facilitate Treatment Planning and  
45 Communication with Patients. *Int J Med Sci Clin Invest.* 2019;7(5):4802-4809.  
46  
47 79. Verghese J, Kuslansky G, Holtzer R, et al. Walking while talking: effect of task prioritization in the  
48 elderly. *Arch Phys Med Rehabil.* 2007;88(1):50-53.  
49  
50  
51 80. Stuck AK, Bachmann M, Fullemann P, Josephson KR, Stuck AE. Effect of testing procedures on  
52 gait speed measurement: A systematic review. *PLoS One.* 2020;15(6):e0234200.  
53  
54  
55

Version: 8.0 Feb 20<sup>th</sup>, 2022

Page 144 of 147

- 1
- 2
- 3
- 4 81. Montero-Odasso M, Casas A, Hansen KT, et al. Quantitative gait analysis under dual-task in older
- 5 people with mild cognitive impairment: a reliability study. *J Neuroeng Rehabil.* 2009;6:35.
- 6
- 7 82. Hittmair-Delazer M, Semenza C, Denes G. Concepts and facts in calculation. *Brain.* 1994;117 ( Pt
- 8 4):715-728.
- 9
- 10 83. Weiss EM, Siedentopf C, Hofer A, et al. Brain activation pattern during a verbal fluency test in
- 11 healthy male and female volunteers: a functional magnetic resonance imaging study. *Neurosci*
- 12 *Lett.* 2003;352(3):191-194.
- 13
- 14 84. Konig A, Klaming L, Pijl M, Demeurraux A, David R, Robert P. Objective measurement of gait
- 15 parameters in healthy and cognitively impaired elderly using the dual-task paradigm. *Aging Clin*
- 16 *Exp Res.* 2017;29(6):1181-1189.
- 17
- 18 85. Montero-Odasso MM, Sarquis-Adamson Y, Speechley M, et al. Association of Dual-Task Gait
- 19 With Incident Dementia in Mild Cognitive Impairment: Results From the Gait and Brain Study.
- 20 *JAMA Neurol.* 2017;74(7):857-865.
- 21
- 22 86. Montero-Odasso M, Oteng-Amoako A, Speechley M, et al. The motor signature of mild cognitive
- 23 impairment: results from the gait and brain study. *J Gerontol A Biol Sci Med Sci.*
- 24 2014;69(11):1415-1421.
- 25
- 26 87. Tinetti ME, Baker DI, McAvay G, et al. A multifactorial intervention to reduce the risk of falling
- 27 among elderly people living in the community. *N Engl J Med.* 1994;331(13):821-827.
- 28
- 29 88. Reyckler G, Boucard E, Peran L, et al. One minute sit-to-stand test is an alternative to 6MWT to
- 30 measure functional exercise performance in COPD patients. *Clin Respir J.* 2018;12(3):1247-1256.
- 31
- 32 89. Crook S, Busching G, Schultz K, et al. A multicentre validation of the 1-min sit-to-stand test in
- 33 patients with COPD. *Eur Respir J.* 2017;49(3).
- 34
- 35 90. Legault C, Jennings JM, Katula JA, et al. Designing clinical trials for assessing the effects of
- 36 cognitive training and physical activity interventions on cognitive outcomes: the Seniors Health
- 37 and Activity Research Program Pilot (SHARP-P) study, a randomized controlled trial. *BMC*
- 38 *Geriatr.* 2011;11:27.
- 39
- 40 91. Coelho FG, Andrade LP, Pedroso RV, et al. Multimodal exercise intervention improves frontal
- 41 cognitive functions and gait in Alzheimer's disease: a controlled trial. *Geriatr Gerontol Int.*
- 42 2013;13(1):198-203.
- 43
- 44 92. Liu-Ambrose T, Nagamatsu LS, Graf P, Beattie BL, Ashe MC, Handy TC. Resistance training and
- 45 executive functions: a 12-month randomized controlled trial. *Arch Intern Med.* 2010;170(2):170-
- 46 178.
- 47
- 48
- 49
- 50
- 51
- 52
- 53
- 54
- 55
- 56
- 57
- 58
- 59
- 60



**Study Title: SYNERGIC@Home**

- 1  
2  
3 93. Nagamatsu LS, Handy TC, Hsu CL, Voss M, Liu-Ambrose T. Resistance training promotes cognitive  
4 and functional brain plasticity in seniors with probable mild cognitive impairment. *Arch Intern*  
5 *Med.* 2012;172(8):666-668.  
6  
7  
8 94. Schwenk M, Zieschang T, Oster P, Hauer K. Dual-task performances can be improved in patients  
9 with dementia: a randomized controlled trial. *Neurology.* 2010;74(24):1961-1968.  
10  
11 95. Silsupadol P, Shumway-Cook A, Lugade V, et al. Effects of single-task versus dual-task training on  
12 balance performance in older adults: a double-blind, randomized controlled trial. *Arch Phys Med*  
13 *Rehabil.* 2009;90(3):381-387.  
14  
15 96. Verghese J, Mahoney J, Ambrose AF, Wang C, Holtzer R. Effect of cognitive remediation on gait  
16 in sedentary seniors. *J Gerontol A Biol Sci Med Sci.* 2010;65(12):1338-1343.  
17  
18 97. You JH, Shetty A, Jones T, Shields K, Belay Y, Brown D. Effects of dual-task cognitive-gait  
19 intervention on memory and gait dynamics in older adults with a history of falls: a preliminary  
20 investigation. *NeuroRehabilitation.* 2009;24(2):193-198.  
21  
22 98. Bherer L, Kramer AF, Peterson MS, Colcombe S, Erickson K, Becic E. Training effects on dual-task  
23 performance: are there age-related differences in plasticity of attentional control? *Psychol*  
24 *Aging.* 2005;20(4):695-709.  
25  
26 99. Bherer L, Kramer AF, Peterson MS, Colcombe S, Erickson K, Becic E. Testing the limits of  
27 cognitive plasticity in older adults: application to attentional control. *Acta Psychol (Amst).*  
28 2006;123(3):261-278.  
29  
30 100. Bherer L, Kramer AF, Peterson MS, Colcombe S, Erickson K, Becic E. Transfer effects in task-set  
31 cost and dual-task cost after dual-task training in older and younger adults: further evidence for  
32 cognitive plasticity in attentional control in late adulthood. *Exp Aging Res.* 2008;34(3):188-219.  
33  
34 101. JW WJaC. *Mixed Methods: Integrating Quantitative and Qualitative Data Collection and Analysis*  
35 *While Studying Patient-Centered Medical Home Models.* Rockville, MD: AHRQ Publication No.13-  
36 0028-EF; February 2013.  
37  
38 102. Lambert SA, Abraham G, Inouye M. Towards clinical utility of polygenic risk scores. *Hum Mol*  
39 *Genet.* 2019;28(R2):R133-R142.  
40  
41 103. Petersen RC, Smith GE, Waring SC, Ivnik RJ, Tangalos EG, Kokmen E. Mild cognitive impairment:  
42 clinical characterization and outcome. *Arch Neurol.* 1999;56(3):303-308.  
43  
44 104. Camicioli R, Majumdar SR. Relationship between mild cognitive impairment and falls in older  
45 people with and without Parkinson's disease: 1-Year Prospective Cohort Study. *Gait Posture.*  
46 2010;32(1):87-91.  
47  
48  
49  
50  
51  
52  
53  
54  
55  
56  
57  
58  
59  
60

Version: 8.0 Feb 20<sup>th</sup>, 2022

Page 146 of 147

- 1  
2  
3 105. Davis JC, Best J, Hsu CL, Nagamatsu LS, Dao E, Liu-Ambrose T. Examining the effect of the  
4 relationship between falls and mild cognitive impairment on mobility and executive functions in  
5 community-dwelling older adults. *J Am Geriatr Soc.* 2015;63(3):590-593.  
6  
7  
8 106. Sage MD, Almeida QJ. A positive influence of vision on motor symptoms during sensory  
9 attention focused exercise for Parkinson's disease. *Mov Disord.* 2010;25(1):64-69.  
10  
11 107. Sage MD, Almeida QJ. Symptom and gait changes after sensory attention focused exercise vs  
12 aerobic training in Parkinson's disease. *Mov Disord.* 2009;24(8):1132-1138.  
13  
14 108. Baker DW, Williams MV, Parker RM, Gazmararian JA, Nurss J. Development of a brief test to  
15 measure functional health literacy. *Patient Education and Counseling.* 1999;38(1):33-42.  
16 doi:10.1016/S0738-3991(98)00116  
17  
18 109. Chesser AK, Keene Woods N, Wiperman J, Wilson R, Dong F. Health Literacy Assessment of the  
19 STOFHLA: Paper Versus Electronic Administration Continuation Study. *Health Educ Behav.*  
20 2014;41(1):19-24. doi:10.1177/109019811347742  
21  
22 110. Connor M, Mantwill S, Schulz PJ. Functional health literacy in Switzerland—Validation of a  
23 German, Italian, and French health literacy test. *Patient Education and Counseling.*  
24 2013;90(1):12-17. doi:10.1016/j.pec.2012.08.018  
25  
26 111. Gavelin HM, Dong C, Minkov R, Bahar-Fuchs A, Ellis KA, Lautenschlager NT, Mellow ML, Wade  
27 AT, Smith AE, Finke C, Krohn S, Lampit A. Combined physical and cognitive training for older  
28 adults with and without cognitive impairment: A systematic review and network meta-analysis  
29 of randomized controlled trials. *Ageing Res Rev.* 2021;66:101232. doi:  
30 10.1016/j.arr.2020.101232.  
31  
32  
33  
34  
35  
36  
37  
38  
39  
40  
41  
42  
43  
44  
45  
46  
47  
48  
49  
50  
51  
52  
53  
54  
55  
56  
57  
58  
59  
60

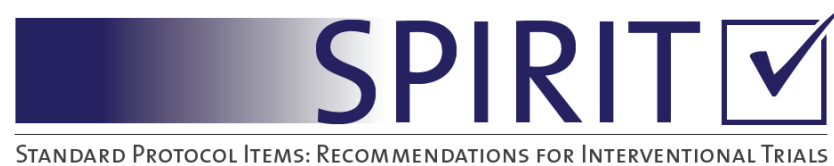

SPIRIT 2013 Checklist: Recommended items to address in a clinical trial protocol and related documents\*

| Section/item                      | Item No | Description                                                                                                                                                                                                                                                                              | Addressed on page number |
|-----------------------------------|---------|------------------------------------------------------------------------------------------------------------------------------------------------------------------------------------------------------------------------------------------------------------------------------------------|--------------------------|
| <b>Administrative information</b> |         |                                                                                                                                                                                                                                                                                          |                          |
| Title                             | 1       | Descriptive title identifying the study design, population, interventions, and, if applicable, trial acronym                                                                                                                                                                             | ___1___                  |
| Trial registration                | 2a      | Trial identifier and registry name. If not yet registered, name of intended registry                                                                                                                                                                                                     | ___1___                  |
|                                   | 2b      | All items from the World Health Organization Trial Registration Data Set                                                                                                                                                                                                                 | ___n/a___                |
| Protocol version                  | 3       | Date and version identifier                                                                                                                                                                                                                                                              | ___1___                  |
| Funding                           | 4       | Sources and types of financial, material, and other support                                                                                                                                                                                                                              | ___16___                 |
| Roles and responsibilities        | 5a      | Names, affiliations, and roles of protocol contributors                                                                                                                                                                                                                                  | ___1,16___               |
|                                   | 5b      | Name and contact information for the trial sponsor                                                                                                                                                                                                                                       | ___n/a___                |
|                                   | 5c      | Role of study sponsor and funders, if any, in study design; collection, management, analysis, and interpretation of data; writing of the report; and the decision to submit the report for publication, including whether they will have ultimate authority over any of these activities | ___n/a___                |
|                                   | 5d      | Composition, roles, and responsibilities of the coordinating centre, steering committee, endpoint adjudication committee, data management team, and other individuals or groups overseeing the trial, if applicable (see Item 21a for data monitoring committee)                         | ___n/a___                |

|    |                                                           |     |                                                                                                                                                                                                                                                                                                                                                                                |                                                                                                                                                                                                |           |
|----|-----------------------------------------------------------|-----|--------------------------------------------------------------------------------------------------------------------------------------------------------------------------------------------------------------------------------------------------------------------------------------------------------------------------------------------------------------------------------|------------------------------------------------------------------------------------------------------------------------------------------------------------------------------------------------|-----------|
| 1  | <b>Introduction</b>                                       |     |                                                                                                                                                                                                                                                                                                                                                                                |                                                                                                                                                                                                |           |
| 2  |                                                           |     |                                                                                                                                                                                                                                                                                                                                                                                |                                                                                                                                                                                                |           |
| 3  | Background and rationale                                  | 6a  | Description of research question and justification for undertaking the trial, including summary of relevant studies (published and unpublished) examining benefits and harms for each intervention                                                                                                                                                                             | ___4,5___                                                                                                                                                                                      |           |
| 4  |                                                           |     |                                                                                                                                                                                                                                                                                                                                                                                |                                                                                                                                                                                                |           |
| 5  |                                                           |     |                                                                                                                                                                                                                                                                                                                                                                                |                                                                                                                                                                                                |           |
| 6  |                                                           | 6b  | Explanation for choice of comparators                                                                                                                                                                                                                                                                                                                                          | ___4___                                                                                                                                                                                        |           |
| 7  |                                                           |     |                                                                                                                                                                                                                                                                                                                                                                                |                                                                                                                                                                                                |           |
| 8  | Objectives                                                | 7   | Specific objectives or hypotheses                                                                                                                                                                                                                                                                                                                                              | ___5___                                                                                                                                                                                        |           |
| 9  |                                                           |     |                                                                                                                                                                                                                                                                                                                                                                                |                                                                                                                                                                                                |           |
| 10 | Trial design                                              | 8   | Description of trial design including type of trial (eg, parallel group, crossover, factorial, single group), allocation ratio, and framework (eg, superiority, equivalence, noninferiority, exploratory)                                                                                                                                                                      | ___5___                                                                                                                                                                                        |           |
| 11 |                                                           |     |                                                                                                                                                                                                                                                                                                                                                                                |                                                                                                                                                                                                |           |
| 12 |                                                           |     |                                                                                                                                                                                                                                                                                                                                                                                |                                                                                                                                                                                                |           |
| 13 |                                                           |     |                                                                                                                                                                                                                                                                                                                                                                                |                                                                                                                                                                                                |           |
| 14 | <b>Methods: Participants, interventions, and outcomes</b> |     |                                                                                                                                                                                                                                                                                                                                                                                |                                                                                                                                                                                                |           |
| 15 |                                                           |     |                                                                                                                                                                                                                                                                                                                                                                                |                                                                                                                                                                                                |           |
| 16 | Study setting                                             | 9   | Description of study settings (eg, community clinic, academic hospital) and list of countries where data will be collected. Reference to where list of study sites can be obtained                                                                                                                                                                                             | ___6___                                                                                                                                                                                        |           |
| 17 |                                                           |     |                                                                                                                                                                                                                                                                                                                                                                                |                                                                                                                                                                                                |           |
| 18 |                                                           |     |                                                                                                                                                                                                                                                                                                                                                                                |                                                                                                                                                                                                |           |
| 19 | Eligibility criteria                                      | 10  | Inclusion and exclusion criteria for participants. If applicable, eligibility criteria for study centres and individuals who will perform the interventions (eg, surgeons, psychotherapists)                                                                                                                                                                                   | ___6,7___                                                                                                                                                                                      |           |
| 20 |                                                           |     |                                                                                                                                                                                                                                                                                                                                                                                |                                                                                                                                                                                                |           |
| 21 |                                                           |     |                                                                                                                                                                                                                                                                                                                                                                                |                                                                                                                                                                                                |           |
| 22 | Interventions                                             | 11a | Interventions for each group with sufficient detail to allow replication, including how and when they will be administered                                                                                                                                                                                                                                                     | ___9,10___                                                                                                                                                                                     |           |
| 23 |                                                           |     |                                                                                                                                                                                                                                                                                                                                                                                |                                                                                                                                                                                                |           |
| 24 |                                                           |     | 11b                                                                                                                                                                                                                                                                                                                                                                            | Criteria for discontinuing or modifying allocated interventions for a given trial participant (eg, drug dose change in response to harms, participant request, or improving/worsening disease) | ___8,9___ |
| 25 |                                                           |     |                                                                                                                                                                                                                                                                                                                                                                                |                                                                                                                                                                                                |           |
| 26 |                                                           |     |                                                                                                                                                                                                                                                                                                                                                                                |                                                                                                                                                                                                |           |
| 27 |                                                           | 11c | Strategies to improve adherence to intervention protocols, and any procedures for monitoring adherence (eg, drug tablet return, laboratory tests)                                                                                                                                                                                                                              | ___9___                                                                                                                                                                                        |           |
| 28 |                                                           |     |                                                                                                                                                                                                                                                                                                                                                                                |                                                                                                                                                                                                |           |
| 29 |                                                           |     |                                                                                                                                                                                                                                                                                                                                                                                |                                                                                                                                                                                                |           |
| 30 |                                                           | 11d | Relevant concomitant care and interventions that are permitted or prohibited during the trial                                                                                                                                                                                                                                                                                  | ___7___                                                                                                                                                                                        |           |
| 31 |                                                           |     |                                                                                                                                                                                                                                                                                                                                                                                |                                                                                                                                                                                                |           |
| 32 | Outcomes                                                  | 12  | Primary, secondary, and other outcomes, including the specific measurement variable (eg, systolic blood pressure), analysis metric (eg, change from baseline, final value, time to event), method of aggregation (eg, median, proportion), and time point for each outcome. Explanation of the clinical relevance of chosen efficacy and harm outcomes is strongly recommended | ___10,11___                                                                                                                                                                                    |           |
| 33 |                                                           |     |                                                                                                                                                                                                                                                                                                                                                                                |                                                                                                                                                                                                |           |
| 34 |                                                           |     |                                                                                                                                                                                                                                                                                                                                                                                |                                                                                                                                                                                                |           |
| 35 | Participant timeline                                      | 13  | Time schedule of enrolment, interventions (including any run-ins and washouts), assessments, and visits for participants. A schematic diagram is highly recommended (see Figure)                                                                                                                                                                                               | ___Fig 1___                                                                                                                                                                                    |           |
| 36 |                                                           |     |                                                                                                                                                                                                                                                                                                                                                                                |                                                                                                                                                                                                |           |
| 37 |                                                           |     |                                                                                                                                                                                                                                                                                                                                                                                |                                                                                                                                                                                                |           |
| 38 |                                                           |     |                                                                                                                                                                                                                                                                                                                                                                                |                                                                                                                                                                                                |           |
| 39 |                                                           |     |                                                                                                                                                                                                                                                                                                                                                                                |                                                                                                                                                                                                |           |
| 40 |                                                           |     |                                                                                                                                                                                                                                                                                                                                                                                |                                                                                                                                                                                                |           |
| 41 |                                                           |     |                                                                                                                                                                                                                                                                                                                                                                                |                                                                                                                                                                                                |           |
| 42 |                                                           |     |                                                                                                                                                                                                                                                                                                                                                                                |                                                                                                                                                                                                |           |
| 43 |                                                           |     |                                                                                                                                                                                                                                                                                                                                                                                |                                                                                                                                                                                                |           |
| 44 |                                                           |     |                                                                                                                                                                                                                                                                                                                                                                                |                                                                                                                                                                                                |           |
| 45 |                                                           |     |                                                                                                                                                                                                                                                                                                                                                                                |                                                                                                                                                                                                |           |
| 46 |                                                           |     |                                                                                                                                                                                                                                                                                                                                                                                |                                                                                                                                                                                                |           |

|   |             |    |                                                                                                                                                                                       |          |
|---|-------------|----|---------------------------------------------------------------------------------------------------------------------------------------------------------------------------------------|----------|
| 1 | Sample size | 14 | Estimated number of participants needed to achieve study objectives and how it was determined, including clinical and statistical assumptions supporting any sample size calculations | ___11___ |
| 2 |             |    |                                                                                                                                                                                       |          |
| 3 |             |    |                                                                                                                                                                                       |          |
| 4 | Recruitment | 15 | Strategies for achieving adequate participant enrolment to reach target sample size                                                                                                   | ___7___  |
| 5 |             |    |                                                                                                                                                                                       |          |

### Methods: Assignment of interventions (for controlled trials)

#### Allocation:

|    |                                  |     |                                                                                                                                                                                                                                                                                                                                                          |         |
|----|----------------------------------|-----|----------------------------------------------------------------------------------------------------------------------------------------------------------------------------------------------------------------------------------------------------------------------------------------------------------------------------------------------------------|---------|
| 10 | Sequence generation              | 16a | Method of generating the allocation sequence (eg, computer-generated random numbers), and list of any factors for stratification. To reduce predictability of a random sequence, details of any planned restriction (eg, blocking) should be provided in a separate document that is unavailable to those who enrol participants or assign interventions | ___8___ |
| 11 |                                  |     |                                                                                                                                                                                                                                                                                                                                                          |         |
| 12 |                                  |     |                                                                                                                                                                                                                                                                                                                                                          |         |
| 13 |                                  |     |                                                                                                                                                                                                                                                                                                                                                          |         |
| 14 |                                  |     |                                                                                                                                                                                                                                                                                                                                                          |         |
| 15 |                                  |     |                                                                                                                                                                                                                                                                                                                                                          |         |
| 16 | Allocation concealment mechanism | 16b | Mechanism of implementing the allocation sequence (eg, central telephone; sequentially numbered, opaque, sealed envelopes), describing any steps to conceal the sequence until interventions are assigned                                                                                                                                                | ___8___ |
| 17 |                                  |     |                                                                                                                                                                                                                                                                                                                                                          |         |
| 18 |                                  |     |                                                                                                                                                                                                                                                                                                                                                          |         |
| 19 |                                  |     |                                                                                                                                                                                                                                                                                                                                                          |         |
| 20 |                                  |     |                                                                                                                                                                                                                                                                                                                                                          |         |
| 21 | Implementation                   | 16c | Who will generate the allocation sequence, who will enrol participants, and who will assign participants to interventions                                                                                                                                                                                                                                | ___8___ |
| 22 |                                  |     |                                                                                                                                                                                                                                                                                                                                                          |         |
| 23 |                                  |     |                                                                                                                                                                                                                                                                                                                                                          |         |
| 24 | Blinding (masking)               | 17a | Who will be blinded after assignment to interventions (eg, trial participants, care providers, outcome assessors, data analysts), and how                                                                                                                                                                                                                | ___8___ |
| 25 |                                  |     |                                                                                                                                                                                                                                                                                                                                                          |         |
| 26 |                                  |     |                                                                                                                                                                                                                                                                                                                                                          |         |
| 27 |                                  | 17b | If blinded, circumstances under which unblinding is permissible, and procedure for revealing a participant's allocated intervention during the trial                                                                                                                                                                                                     | ___8___ |
| 28 |                                  |     |                                                                                                                                                                                                                                                                                                                                                          |         |
| 29 |                                  |     |                                                                                                                                                                                                                                                                                                                                                          |         |

### Methods: Data collection, management, and analysis

|    |                         |     |                                                                                                                                                                                                                                                                                                                                                                                                              |           |
|----|-------------------------|-----|--------------------------------------------------------------------------------------------------------------------------------------------------------------------------------------------------------------------------------------------------------------------------------------------------------------------------------------------------------------------------------------------------------------|-----------|
| 33 | Data collection methods | 18a | Plans for assessment and collection of outcome, baseline, and other trial data, including any related processes to promote data quality (eg, duplicate measurements, training of assessors) and a description of study instruments (eg, questionnaires, laboratory tests) along with their reliability and validity, if known. Reference to where data collection forms can be found, if not in the protocol | ___13___  |
| 34 |                         |     |                                                                                                                                                                                                                                                                                                                                                                                                              |           |
| 35 |                         |     |                                                                                                                                                                                                                                                                                                                                                                                                              |           |
| 36 |                         |     |                                                                                                                                                                                                                                                                                                                                                                                                              |           |
| 37 |                         |     |                                                                                                                                                                                                                                                                                                                                                                                                              |           |
| 38 |                         |     |                                                                                                                                                                                                                                                                                                                                                                                                              |           |
| 39 |                         | 18b | Plans to promote participant retention and complete follow-up, including list of any outcome data to be collected for participants who discontinue or deviate from intervention protocols                                                                                                                                                                                                                    | ___7,8___ |
| 40 |                         |     |                                                                                                                                                                                                                                                                                                                                                                                                              |           |
| 41 |                         |     |                                                                                                                                                                                                                                                                                                                                                                                                              |           |
| 42 |                         |     |                                                                                                                                                                                                                                                                                                                                                                                                              |           |

|    |                                 |     |                                                                                                                                                                                                                                                                                                                                       |             |
|----|---------------------------------|-----|---------------------------------------------------------------------------------------------------------------------------------------------------------------------------------------------------------------------------------------------------------------------------------------------------------------------------------------|-------------|
| 1  | Data management                 | 19  | Plans for data entry, coding, security, and storage, including any related processes to promote data quality (eg, double data entry; range checks for data values). Reference to where details of data management procedures can be found, if not in the protocol                                                                     | ___13___    |
| 2  |                                 |     |                                                                                                                                                                                                                                                                                                                                       |             |
| 3  |                                 |     |                                                                                                                                                                                                                                                                                                                                       |             |
| 4  |                                 |     |                                                                                                                                                                                                                                                                                                                                       |             |
| 5  | Statistical methods             | 20a | Statistical methods for analysing primary and secondary outcomes. Reference to where other details of the statistical analysis plan can be found, if not in the protocol                                                                                                                                                              | ___11,12___ |
| 6  |                                 |     |                                                                                                                                                                                                                                                                                                                                       |             |
| 7  |                                 |     |                                                                                                                                                                                                                                                                                                                                       |             |
| 8  |                                 | 20b | Methods for any additional analyses (eg, subgroup and adjusted analyses)                                                                                                                                                                                                                                                              | ___11,12___ |
| 9  |                                 |     |                                                                                                                                                                                                                                                                                                                                       |             |
| 10 |                                 | 20c | Definition of analysis population relating to protocol non-adherence (eg, as randomised analysis), and any statistical methods to handle missing data (eg, multiple imputation)                                                                                                                                                       | ___n/a___   |
| 11 |                                 |     |                                                                                                                                                                                                                                                                                                                                       |             |
| 12 |                                 |     |                                                                                                                                                                                                                                                                                                                                       |             |
| 13 |                                 |     |                                                                                                                                                                                                                                                                                                                                       |             |
| 14 | <b>Methods: Monitoring</b>      |     |                                                                                                                                                                                                                                                                                                                                       |             |
| 15 |                                 |     |                                                                                                                                                                                                                                                                                                                                       |             |
| 16 | Data monitoring                 | 21a | Composition of data monitoring committee (DMC); summary of its role and reporting structure; statement of whether it is independent from the sponsor and competing interests; and reference to where further details about its charter can be found, if not in the protocol. Alternatively, an explanation of why a DMC is not needed | ___13___    |
| 17 |                                 |     |                                                                                                                                                                                                                                                                                                                                       |             |
| 18 |                                 |     |                                                                                                                                                                                                                                                                                                                                       |             |
| 19 |                                 |     |                                                                                                                                                                                                                                                                                                                                       |             |
| 20 |                                 |     |                                                                                                                                                                                                                                                                                                                                       |             |
| 21 |                                 |     |                                                                                                                                                                                                                                                                                                                                       |             |
| 22 |                                 | 21b | Description of any interim analyses and stopping guidelines, including who will have access to these interim results and make the final decision to terminate the trial                                                                                                                                                               | ___n/a___   |
| 23 |                                 |     |                                                                                                                                                                                                                                                                                                                                       |             |
| 24 |                                 |     |                                                                                                                                                                                                                                                                                                                                       |             |
| 25 | Harms                           | 22  | Plans for collecting, assessing, reporting, and managing solicited and spontaneously reported adverse events and other unintended effects of trial interventions or trial conduct                                                                                                                                                     | ___11___    |
| 26 |                                 |     |                                                                                                                                                                                                                                                                                                                                       |             |
| 27 |                                 |     |                                                                                                                                                                                                                                                                                                                                       |             |
| 28 | Auditing                        | 23  | Frequency and procedures for auditing trial conduct, if any, and whether the process will be independent from investigators and the sponsor                                                                                                                                                                                           | ___13___    |
| 29 |                                 |     |                                                                                                                                                                                                                                                                                                                                       |             |
| 30 |                                 |     |                                                                                                                                                                                                                                                                                                                                       |             |
| 31 |                                 |     |                                                                                                                                                                                                                                                                                                                                       |             |
| 32 | <b>Ethics and dissemination</b> |     |                                                                                                                                                                                                                                                                                                                                       |             |
| 33 |                                 |     |                                                                                                                                                                                                                                                                                                                                       |             |
| 34 | Research ethics approval        | 24  | Plans for seeking research ethics committee/institutional review board (REC/IRB) approval                                                                                                                                                                                                                                             | ___14___    |
| 35 |                                 |     |                                                                                                                                                                                                                                                                                                                                       |             |
| 36 |                                 |     |                                                                                                                                                                                                                                                                                                                                       |             |
| 37 | Protocol amendments             | 25  | Plans for communicating important protocol modifications (eg, changes to eligibility criteria, outcomes, analyses) to relevant parties (eg, investigators, REC/IRBs, trial participants, trial registries, journals, regulators)                                                                                                      | ___13___    |
| 38 |                                 |     |                                                                                                                                                                                                                                                                                                                                       |             |
| 39 |                                 |     |                                                                                                                                                                                                                                                                                                                                       |             |
| 40 |                                 |     |                                                                                                                                                                                                                                                                                                                                       |             |
| 41 |                                 |     |                                                                                                                                                                                                                                                                                                                                       |             |
| 42 |                                 |     |                                                                                                                                                                                                                                                                                                                                       |             |

|    |                               |     |                                                                                                                                                                                                                                                                                     |                              |
|----|-------------------------------|-----|-------------------------------------------------------------------------------------------------------------------------------------------------------------------------------------------------------------------------------------------------------------------------------------|------------------------------|
| 1  | Consent or assent             | 26a | Who will obtain informed consent or assent from potential trial participants or authorised surrogates, and how (see Item 32)                                                                                                                                                        | <u>7</u>                     |
| 2  |                               |     |                                                                                                                                                                                                                                                                                     |                              |
| 3  |                               |     |                                                                                                                                                                                                                                                                                     |                              |
| 4  |                               | 26b | Additional consent provisions for collection and use of participant data and biological specimens in ancillary studies, if applicable                                                                                                                                               | <u>7</u>                     |
| 5  |                               |     |                                                                                                                                                                                                                                                                                     |                              |
| 6  |                               |     |                                                                                                                                                                                                                                                                                     |                              |
| 7  | Confidentiality               | 27  | How personal information about potential and enrolled participants will be collected, shared, and maintained in order to protect confidentiality before, during, and after the trial                                                                                                | <u>13</u>                    |
| 8  |                               |     |                                                                                                                                                                                                                                                                                     |                              |
| 9  |                               |     |                                                                                                                                                                                                                                                                                     |                              |
| 10 | Declaration of interests      | 28  | Financial and other competing interests for principal investigators for the overall trial and each study site                                                                                                                                                                       | <u>16</u>                    |
| 11 |                               |     |                                                                                                                                                                                                                                                                                     |                              |
| 12 |                               |     |                                                                                                                                                                                                                                                                                     |                              |
| 13 | Access to data                | 29  | Statement of who will have access to the final trial dataset, and disclosure of contractual agreements that limit such access for investigators                                                                                                                                     | <u>13</u>                    |
| 14 |                               |     |                                                                                                                                                                                                                                                                                     |                              |
| 15 |                               |     |                                                                                                                                                                                                                                                                                     |                              |
| 16 | Ancillary and post-trial care | 30  | Provisions, if any, for ancillary and post-trial care, and for compensation to those who suffer harm from trial participation                                                                                                                                                       | <u>n/a</u>                   |
| 17 |                               |     |                                                                                                                                                                                                                                                                                     |                              |
| 18 |                               |     |                                                                                                                                                                                                                                                                                     |                              |
| 19 |                               |     |                                                                                                                                                                                                                                                                                     |                              |
| 20 | Dissemination policy          | 31a | Plans for investigators and sponsor to communicate trial results to participants, healthcare professionals, the public, and other relevant groups (eg, via publication, reporting in results databases, or other data sharing arrangements), including any publication restrictions | <u>14</u>                    |
| 21 |                               |     |                                                                                                                                                                                                                                                                                     |                              |
| 22 |                               |     |                                                                                                                                                                                                                                                                                     |                              |
| 23 |                               |     |                                                                                                                                                                                                                                                                                     |                              |
| 24 |                               | 31b | Authorship eligibility guidelines and any intended use of professional writers                                                                                                                                                                                                      | <u>14</u>                    |
| 25 |                               |     |                                                                                                                                                                                                                                                                                     |                              |
| 26 |                               | 31c | Plans, if any, for granting public access to the full protocol, participant-level dataset, and statistical code                                                                                                                                                                     | <u>13</u>                    |
| 27 |                               |     |                                                                                                                                                                                                                                                                                     |                              |
| 28 |                               |     |                                                                                                                                                                                                                                                                                     |                              |
| 29 | <b>Appendices</b>             |     |                                                                                                                                                                                                                                                                                     |                              |
| 30 |                               |     |                                                                                                                                                                                                                                                                                     |                              |
| 31 | Informed consent materials    | 32  | Model consent form and other related documentation given to participants and authorised surrogates                                                                                                                                                                                  | <u>Appendix C &amp; D</u>    |
| 32 |                               |     |                                                                                                                                                                                                                                                                                     |                              |
| 33 |                               |     |                                                                                                                                                                                                                                                                                     |                              |
| 34 | Biological specimens          | 33  | Plans for collection, laboratory evaluation, and storage of biological specimens for genetic or molecular analysis in the current trial and for future use in ancillary studies, if applicable                                                                                      | <u>Appendix A, D &amp; E</u> |
| 35 |                               |     |                                                                                                                                                                                                                                                                                     |                              |
| 36 |                               |     |                                                                                                                                                                                                                                                                                     |                              |

\*It is strongly recommended that this checklist be read in conjunction with the SPIRIT 2013 Explanation & Elaboration for important clarification on the items. Amendments to the protocol should be tracked and dated. The SPIRIT checklist is copyrighted by the SPIRIT Group under the Creative Commons [“Attribution-NonCommercial-NoDerivs 3.0 Unported”](https://creativecommons.org/licenses/by-nc-nd/3.0/) license.
